# Supplementary material for: Molecular and functional signatures in a novel Alzheimer’s disease mouse model assessed by quantitative proteomics
Source: Mol Neurodegener. 2018 Jan 16;13:2. doi: 10.1186/s13024-017-0234-4 (PMC5771139; doi:10.1186/s13024-017-0234-4)
Supplement: Supplementary file 3 — All identified protein groups. (XLSX 1130 kb) [file 13024_2017_234_MOESM3_ESM.xlsx]

## Sheet: Identified proteins
Identifiers						Information on identification										GO classification					Normalized protein abundance (Ratio to pooled sample)
Master	Accession	Description	Gene ID	Entrez Gene ID	Ensembl Gene ID	Protein FDR Confidence	Contaminant	# Peptides	# PSMs	# Unique Peptides	Exp. q-value	Sum PEP Score	Score Sequest HT	Coverage (%)	emPAI	Chromosome	Biological Process	Cellular Component	Molecular Function	Pfam IDs	4M Wild type B1 T1	4M Wild type B1 T2	4M Wild type B2 T1	4M Wild type B2 T2	4M Wild type B3 T1	4M Wild type B3 T2	4M APP/PS1 B1 T1	4M APP/PS1 B1 T2	4M APP/PS1 B2 T1	4M APP/PS1 B2 T2	4M APP/PS1 B3 T1	4M APP/PS1 B3 T2	4M Tau B1 T1	4M Tau B1 T2	4M Tau B2 T1	4M Tau B2 T2	4M Tau B3 T1	4M Tau B3 T2	4M APT B1 T1	4M APT B1 T2	4M APT B2 T1	4M APT B2 T2	4M APT B3 T1	4M APT B3 T2	7M Wild type B1 T1	7M Wild type B1 T2	7M Wild type B2 T1	7M Wild type B2 T2	7M Wild type B3 T1
Master Protein	P16546	Spectrin alpha chain, non-erythrocytic 1 OS=Mus musculus GN=Sptan1 PE=1 SV=4	Spna2; Sptan1	20740	ENSMUSG00000057738	High	FALSE	304	17625	10	0	3403.38	72653.7	87.9045	6217	2	cell organization and biogenesis;regulation of biological process	cytoplasm;cytoskeleton;membrane	metal ion binding;protein binding	Pf00018, Pf00036, Pf00435, Pf07653, Pf08239, Pf08726, Pf12128, Pf13405, Pf13499, Pf14604	1.008	1.007	0.975	0.966	1.017	1.012	0.891	0.905	1.007	1.002	0.941	0.942	1.015	1.021	1.033	1.032	0.924	0.93	1.021	1.012	0.943	0.945	0.935	0.934	0.978	0.981	1.029	1.023	1.033
Master Protein	Q9JHU4	Cytoplasmic dynein 1 heavy chain 1 OS=Mus musculus GN=Dync1h1 PE=1 SV=2	Dync1h1	13424	ENSMUSG00000018707	High	FALSE	329	9715	329	0	3377.19	38616.5	71.8992	414.007	12	cell organization and biogenesis;cellular component movement;metabolic process;transport	cytoplasm;cytoskeleton;membrane	catalytic activity;motor activity;nucleotide binding;protein binding;RNA binding	Pf00769, Pf03028, Pf03915, Pf04156, Pf07246, Pf07728, Pf08385, Pf08393, Pf12774, Pf12775, Pf12777, Pf12780, Pf12781, Pf13173, Pf13207, Pf13401	0.973	0.98	0.934	0.928	0.962	0.965	0.93	0.935	1.018	1.017	0.964	0.964	0.956	0.964	0.988	0.994	0.902	0.901	1.021	1.02	0.938	0.94	0.962	0.962	0.988	0.992	1.013	1.01	0.991
Master Protein	E9Q447	Spectrin alpha chain, non-erythrocytic 1 OS=Mus musculus GN=Sptan1 PE=1 SV=1	Spna2; Sptan1	20740	ENSMUSG00000057738	High	FALSE	297	17525	3	0	3335.89	72385.2	86.4407	5178.48	2	cell organization and biogenesis;regulation of biological process	cytoplasm;cytoskeleton;membrane	metal ion binding;protein binding	Pf00018, Pf00036, Pf00435, Pf07653, Pf08239, Pf08726, Pf12128, Pf13405, Pf13499, Pf14604	0.997	1.004	0.995	0.994	0.991	0.971	0.851	0.883	0.999	1.027	0.948	0.971	1.028	1.055	1.03	1.042	0.881	0.885	1.016	1.031	0.848	0.964	0.91	0.963	0.997	0.98	1.029	1.057	1.039
Master Protein	B7ZWK3	Spna2 protein OS=Mus musculus GN=Sptan1 PE=2 SV=1	Spna2; Sptan1	20740		High	FALSE	296	17111	2	0	3334.28	71204.3	87.0167	5536.52	2	cell organization and biogenesis;regulation of biological process	cytoplasm;cytoskeleton;membrane	metal ion binding;protein binding	Pf00018, Pf00036, Pf00435, Pf07653, Pf08239, Pf08726, Pf12128, Pf13405, Pf13499, Pf14604	1.046	0.873	0.942	0.963	0.975	0.969	1.067		1.026	0.941	1.018	1.017	1.015	1.06	1.04	0.964	0.97		0.951	0.915	0.952	0.976	0.92	0.941	1.026	1.008	1.036	1	0.975
Master Protein	Q9QXS1-11	Isoform PLEC-1E,2A of Plectin OS=Mus musculus GN=Plec	Plec			High	FALSE	374	6537	369	0	2855.98	25334.8	74.9669	99			cytoskeleton	protein binding	Pf00307, Pf00681, Pf07812, Pf11971	0.968	0.966	0.875	0.868	0.954	0.96	0.89	0.903	0.985	0.981	0.918	0.912	0.95	0.947	0.983	0.982	0.887	0.895	1.018	1.007	0.925	0.919	0.873	0.867	0.967	0.978	1.05	1.043	1.016
Master Protein	Q62261	Spectrin beta chain, non-erythrocytic 1 OS=Mus musculus GN=Sptbn1 PE=1 SV=2	Spnb2; Sptbn1	20742	ENSMUSG00000020315	High	FALSE	243	13335	218	0	2671.07	52135.7	85.019	3644.26	11	cell organization and biogenesis;metabolic process;regulation of biological process;transport	cytoplasm;cytoskeleton;membrane;nucleus	protein binding;RNA binding;structural molecule activity	Pf00169, Pf00307, Pf00435, Pf11971, Pf12128, Pf15410	0.973	0.969	0.951	0.942	0.983	0.983	0.891	0.902	0.994	0.983	0.934	0.931	0.972	0.973	0.998	0.989	0.914	0.917	1.003	0.995	0.925	0.926	0.922	0.922	0.975	0.977	1.005	0.998	1.004
Master Protein	Q68FG2	Protein Sptbn2 OS=Mus musculus GN=Sptbn2 PE=1 SV=1	Spnb3; Sptbn2	20743	ENSMUSG00000067889	High	FALSE	193	7365	17	0	2087.47	30984.1	82.0771	551.499	19	cell organization and biogenesis;response to stimulus;transport	cytoplasm;endosome;membrane	protein binding;structural molecule activity	Pf00169, Pf00307, Pf00435, Pf11971, Pf15410	1.027	1.034	1.006	0.988	1.067	1.056	0.903	0.908	0.989	0.995	0.931	0.928	1.029	1.047	1.059	1.06	0.971	0.977	0.991	0.995	0.962	0.957	0.938	0.934	0.975	0.976	1.029	1.033	1.068
Master Protein	Q9QXZ0	Microtubule-actin cross-linking factor 1 OS=Mus musculus GN=Macf1 PE=1 SV=2	Macf1	11426		High	FALSE	307	2814	3	0	2080.07	10923.9	47.8107	9.095	4	cell organization and biogenesis;cellular component movement;metabolic process;regulation of biological process;response to stimulus;transport	cytoplasm;cytoskeleton;Golgi;membrane	catalytic activity;metal ion binding;motor activity;protein binding	Pf00036, Pf00307, Pf00435, Pf00681, Pf01576, Pf02187, Pf02463, Pf11971, Pf13499, Pf13514, Pf13833	0.982	0.99	0.945	0.929	0.991	0.983	0.909	0.906	1.01	1.017	0.996	0.985	0.972	0.984	0.997	0.99	0.921	0.916	1.026	1.031	0.971	0.96	0.949	0.947	0.983	0.985	1.028	1.034	0.998
Master Protein	Q9QXZ0-4	Isoform 4 of Microtubule-actin cross-linking factor 1 OS=Mus musculus GN=Macf1	Macf1			High	FALSE	285	2728	0	0	1984.2	10596.4	59.1639	17.174		regulation of biological process		metal ion binding;protein binding	Pf00036, Pf00307, Pf00435, Pf02187, Pf02463, Pf11971, Pf13499, Pf13514, Pf13833			0.883	0.86		0.79					0.907	0.821									0.924	0.877	0.924	0.851		0.876
Master Protein	Q5SXR6	Clathrin heavy chain OS=Mus musculus GN=Cltc PE=1 SV=1	Cltc	67300	ENSMUSG00000047126	High	FALSE	137	12351	113	0	1911.59	53472.3	81.4771	9999	11	cell differentiation;cell organization and biogenesis;metabolic process;regulation of biological process;transport	membrane;mitochondrion	protein binding;RNA binding;structural molecule activity	Pf00637, Pf01394, Pf04053, Pf09268, Pf13838	0.956	0.935	1.001	0.998	0.97	0.964	0.917	0.916	0.945	0.918	0.958	0.96	0.974	0.95	0.952	0.932	0.955	0.951	0.946	0.921	0.974	0.98	0.946	0.95	0.957	0.954	0.987	0.962	1.028
Master Protein	Q8C8R3-2	Isoform 2 of Ankyrin-2 OS=Mus musculus GN=Ank2	Ank2			High	FALSE	226	4473	3	0	1828.59	17527.6	66.4289	70.658		regulation of biological process;response to stimulus		protein binding	Pf00023, Pf00531, Pf00791, Pf03326, Pf12796, Pf13606, Pf13637, Pf13857	0.99	0.981	0.949	0.952	0.988	0.983	0.926	0.937	1	0.987	0.943	0.953	0.963	0.966	0.993	0.984	0.921	0.93	1.057	1.043	0.944	0.958	0.937	0.95	0.994	1.001	1.04	1.042	1.028
Master Protein	Q8C8R3-4	Isoform 4 of Ankyrin-2 OS=Mus musculus GN=Ank2	Ank2			High	FALSE	224	4297	4	0	1816.87	16770.2	65.9763	66.002		regulation of biological process;response to stimulus		protein binding	Pf00023, Pf00531, Pf00791, Pf03326, Pf12796, Pf13606, Pf13637, Pf13857	0.932	0.986	0.98	0.91	1.058	0.966	1.017	0.897	0.957	0.968	0.95	0.901	0.937	0.963	0.934	0.946	0.867	0.814	1.041	1.027	0.929	0.957	0.919	0.936	1.013	1.009	1.016	1.007	1.073
Master Protein	F6Q750	Microtubule-actin cross-linking factor 1 (Fragment) OS=Mus musculus GN=Macf1 PE=1 SV=1	Macf1	11426	ENSMUSG00000028649	High	FALSE	254	2396	1	0	1797.13	9431.29	65.4775	23.317	4	cell organization and biogenesis;cellular component movement;metabolic process;regulation of biological process;response to stimulus;transport	cytoplasm;cytoskeleton;Golgi;membrane	catalytic activity;metal ion binding;protein binding	Pf00036, Pf00435, Pf02187, Pf02463, Pf13499, Pf13833	0.953	1.015	0.948	0.927	1.008	1.057	0.9	0.89	0.984	1.074	0.967	0.976	0.981	1.002	0.961	1.015	0.907	0.893	0.975	1.044	0.993	0.961	0.959	0.964	0.987	1.04	0.988	1.075	0.992
Master Protein	Q6A087	MKIAA0302 protein (Fragment) OS=Mus musculus GN=Sptbn2 PE=2 SV=1	Spnb3; Sptbn2	20743		High	FALSE	163	5920	2	0	1746.59	25296.8	83.8235	509.539	19	cell organization and biogenesis;response to stimulus;transport	cytoplasm;endosome;membrane	protein binding;structural molecule activity	Pf00169, Pf00435, Pf15410	0.574	0.573	1.422	1.501	0.51	0.732	0.93	0.94	0.539	0.578	1.133	1.067	0.828	0.721	0.858	0.784	0.903	0.847	0.604	0.638	1.16	1.13	1.437	1.567	0.433	0.706	1.061	1.014	1.027
Master Protein	O88737	Protein bassoon OS=Mus musculus GN=Bsn PE=1 SV=4	Bsn	12217	ENSMUSG00000032589	High	FALSE	194	3622	188	0	1732.41	14260.5	64.5865	65.651	9	cell organization and biogenesis	cell surface;cytoplasm;cytoskeleton	metal ion binding;protein binding	Pf05715	1.06	1.053	0.962	0.947	1.02	1.022	0.92	0.919	1.004	0.991	0.903	0.902	0.974	0.98	1.016	1.011	0.938	0.928	1.091	1.079	0.942	0.937	0.906	0.903	0.992	1	1.087	1.077	1.094
Master Protein	Q6ZWR6	Nesprin-1 OS=Mus musculus GN=Syne1 PE=1 SV=2	Syne1	64009		High	FALSE	298	1466	232	0	1654.67	5644.22	40.6637	3.74	10	cell differentiation;cell organization and biogenesis;regulation of biological process	cytoplasm;cytoskeleton;Golgi;membrane;nucleus	protein binding;RNA binding	Pf00307, Pf00435, Pf10541, Pf12128	0.972	0.984	0.95	0.935	0.991	1.008	0.907	0.895	0.998	1.006	0.959	0.961	0.957	0.982	0.994	1.004	0.9	0.891	0.984	0.987	0.946	0.945	0.918	0.922	0.988	0.998	1.009	1.02	1.011
Master Protein	B1ARU1	Microtubule-actin cross-linking factor 1 OS=Mus musculus GN=Macf1 PE=1 SV=1	Macf1	11426	ENSMUSG00000028649	High	FALSE	228	2092	3	0	1609.43	8354.94	45.8185	8.291	4	cell organization and biogenesis;cellular component movement;metabolic process;regulation of biological process;response to stimulus;transport	cytoplasm;cytoskeleton;Golgi;membrane	catalytic activity;metal ion binding;protein binding	Pf00036, Pf00435, Pf00681, Pf02187, Pf02463, Pf03938, Pf13499, Pf13514, Pf13833	0.908					0.904			0.913				0.891		0.877				0.964							0.926	0.952
Master Protein	P20357	Microtubule-associated protein 2 OS=Mus musculus GN=Map2 PE=1 SV=2	Map2; Mtap2	17756	ENSMUSG00000015222	High	FALSE	162	4947	93	0	1557.99	19797.5	76.0941	1815.6	1	cell organization and biogenesis;regulation of biological process;response to stimulus	cytoplasm;cytoskeleton;endoplasmic reticulum	protein binding	Pf00418, Pf08377	1.112	1.124	0.985	0.968	1.081	1.089	0.936	0.949	0.993	1.007	0.909	0.899	0.988	1.006	0.962	0.975	0.86	0.854	1.133	1.146	1.117	1.11	0.922	0.923	1.049	1.054	1.207	1.218	1.232
Master Protein	A2ARP8	Microtubule-associated protein 1A OS=Mus musculus GN=Map1a PE=1 SV=1	Map1a; Mtap1a	17754	ENSMUSG00000027254	High	FALSE	182	4243	180	0	1538.08	16999.7	59.29	273.382	2	cell organization and biogenesis;regulation of biological process	cytoplasm;cytoskeleton;cytosol	protein binding	Pf02463	1.052	1.065	0.95	0.949	1.095	1.105	0.931	0.917	0.992	0.99	0.889	0.885	1.007	1.025	1.001	1.008	0.893	0.879	1.082	1.083	0.993	0.989	0.875	0.879	1.041	1.056	1.126	1.13	1.141
Master Protein	Q9QYX7	Protein piccolo OS=Mus musculus GN=Pclo PE=1 SV=4	Pclo	26875	ENSMUSG00000061601	High	FALSE	209	2589	202	0	1498.38	10005.9	48.0466	23.347	5	cell organization and biogenesis;regulation of biological process;response to stimulus;transport	cytoskeleton	metal ion binding;protein binding	Pf00168, Pf00595, Pf05715, Pf09770, Pf15449	1.091	1.072	0.968	0.953	1.053	1.055	0.9	0.9	0.986	0.981	0.931	0.927	1.017	0.999	1.045	1.029	0.955	0.958	1.054	1.04	0.975	0.967	0.934	0.928	1.009	1.028	1.085	1.077	1.079
Master Protein	Q3UH59	Myosin-10 OS=Mus musculus GN=Myh10 PE=1 SV=1	Myh10	77579	ENSMUSG00000020900	High	FALSE	167	3101	2	0	1458.15	12483.8	65.4744	332.485	11	cell organization and biogenesis;cell proliferation;cellular component movement;metabolic process;regulation of biological process;transport	cytoplasm;cytoskeleton;extracellular;membrane;mitochondrion;nucleus	catalytic activity;motor activity;nucleotide binding;protein binding;transporter activity	Pf00063, Pf00769, Pf01442, Pf01496, Pf01576, Pf02736, Pf02841, Pf04012, Pf04111, Pf05622, Pf05667, Pf05911, Pf06637, Pf07888, Pf09726, Pf09731, Pf12128, Pf13094, Pf13514	1.085	1.031	0.948	0.817	1.001	1.044	0.87	0.909	1.09	1.143	0.872	0.922	0.953	0.978	1.096	1.071	0.934	0.903	1.045	1.066	0.934	0.904	0.983	0.903	1.02	1.062	1.11	1.123	1.03
Master Protein	Q5SV64	Myosin-10 OS=Mus musculus GN=Myh10 PE=1 SV=1	Myh10	77579	ENSMUSG00000020900	High	FALSE	168	3088	3	0	1456.2	12463.3	67.3642	335.614	11	cell organization and biogenesis;cell proliferation;cellular component movement;metabolic process;regulation of biological process;transport	cytoplasm;cytoskeleton;membrane;mitochondrion;nucleus	catalytic activity;motor activity;nucleotide binding;protein binding;transporter activity	Pf00063, Pf00769, Pf01496, Pf01576, Pf02736, Pf02841, Pf04111, Pf05622, Pf05667, Pf05911, Pf06637, Pf07888, Pf09726, Pf09731, Pf12128, Pf13094, Pf13514	0.99	0.999	0.945	0.937	0.975	0.978	0.937	0.933	1.007	1.015	0.991	0.993	0.978	0.996	0.999	1.003	0.937	0.926	1.03	1.041	0.969	0.978	0.942	0.947	1.006	1.013	1.045	1.059	1.037
Master Protein	E9Q401	Ryanodine receptor 2 OS=Mus musculus GN=Ryr2 PE=1 SV=1	Ryr2	20191	ENSMUSG00000021313	High	FALSE	208	1944	194	0	1441.58	7608.99	48.8321	10.986	13	cell communication;cell death;cellular homeostasis;development;regulation of biological process;response to stimulus;transport	cytoplasm;cytosol;endoplasmic reticulum;membrane	metal ion binding;protein binding;transporter activity	Pf00520, Pf00622, Pf01365, Pf02026, Pf02815, Pf06459, Pf08454, Pf08709, Pf13499, Pf13833, Pf14070	1.004	1.016	0.978	0.973	1.018	1.041	0.879	0.882	0.967	0.983	0.954	0.961	1.021	1.035	1.046	1.052	0.985	1.001	0.953	0.97	0.928	0.94	0.96	0.973	0.971	0.991	0.993	1.01	1.023
Master Protein	S4R1P5	Dystonin OS=Mus musculus GN=Dst PE=1 SV=1	Dst	13518	ENSMUSG00000103888	High	FALSE	227	1395	8	0	1296.82	5100.49	32.72	3.548	1	cell organization and biogenesis;cellular component movement;regulation of biological process;transport	cytoplasm;cytoskeleton;endoplasmic reticulum;membrane;nucleus	metal ion binding;protein binding	Pf00036, Pf00307, Pf00435, Pf00681, Pf02187, Pf06008, Pf11971, Pf12128, Pf13499, Pf13514, Pf13833	0.949	0.961	0.877	0.87	0.941	0.938	0.925	0.918	0.999	0.997	0.944	0.933	0.925	0.953	0.975	0.979	0.872	0.861	1.009	1.011	0.926	0.926	0.929	0.925	1.006	1.002	0.994	1.003	0.996
Master Protein	B2RQQ5	Microtubule-associated protein 1B OS=Mus musculus GN=Map1b PE=2 SV=1	Map1b; Mtap1b	17755		High	FALSE	152	3687	2	0	1279.93	14207.9	60.1867	264.461	13	cell growth;cell organization and biogenesis;cellular component movement;regulation of biological process;transport	cytoplasm;cytoskeleton;cytosol;membrane	protein binding		1.043	1.045	0.961	0.958	1.029	1.016	0.996	1.015	1.003	1.005	0.966	0.957	0.961	0.958	1	0.994	0.926	0.931	0.995	0.994	1.031	1.024	0.96	0.952	1.004	1.005	1.053	1.058	1.056
Master Protein	P14873	Microtubule-associated protein 1B OS=Mus musculus GN=Map1b PE=1 SV=2	Map1b; Mtap1b	17755	ENSMUSG00000052727	High	FALSE	151	3665	1	0	1274.91	14135.5	60.0649	259.615	13	cell growth;cell organization and biogenesis;cellular component movement;regulation of biological process;transport	cytoplasm;cytoskeleton;cytosol;membrane	protein binding		1.683	1.628	0.425	0.35	1.476	1.129	1.152	1.186	0.373	0.357	0.442	0.356	0.254	0.3	1.58	1.512	1.052	1.124	0.294	0.299	1.24	1.288	0.446	0.407	0.398	0.515	0.35	0.321	0.421
Master Protein	Q91ZU6	Dystonin OS=Mus musculus GN=Dst PE=1 SV=2	Dst	13518	ENSMUSG00000026131	High	FALSE	220	1378	1	0	1272.19	5043.46	33.0448	3.657	1	cell organization and biogenesis;cellular component movement;regulation of biological process;transport	cytoplasm;cytoskeleton;endoplasmic reticulum;membrane;nucleus	metal ion binding;protein binding	Pf00036, Pf00307, Pf00435, Pf00681, Pf02187, Pf02463, Pf06008, Pf11971, Pf12128, Pf13499, Pf13514, Pf13833	0.943	1.019	0.841	0.902			0.944	1.001	1.088	1.091	0.908	0.949	0.838	0.92	0.994	1.01	0.931	0.932	1.053	1.145	0.924	0.927	0.908	0.991			1.067	1.102
Master Protein	Q6PIC6	Sodium/potassium-transporting ATPase subunit alpha-3 OS=Mus musculus GN=Atp1a3 PE=1 SV=1	Atp1a3	232975	ENSMUSG00000040907	High	FALSE	97	20146	66	0	1217.43	87893.9	67.7196	87331.6	7	cellular homeostasis;metabolic process;regulation of biological process;response to stimulus;transport	cytoplasm;endoplasmic reticulum;Golgi;membrane;nucleus	catalytic activity;metal ion binding;nucleotide binding;protein binding;transporter activity	Pf00122, Pf00689, Pf00690, Pf00702, Pf08282, Pf12710, Pf13246	0.948	0.942	0.989	0.991	0.952	0.952	0.961	0.969	0.957	0.948	0.996	1.007	0.958	0.952	0.945	0.937	0.935	0.936	0.908	0.899	0.968	0.979	0.965	0.977	0.963	0.966	0.958	0.951	0.982
Master Protein	B2RY15	Tln2 protein OS=Mus musculus GN=Tln2 PE=2 SV=1	Tln2	70549		High	FALSE	145	1851	42	0	1184.71	7444.15	69.3548	42.804	9	cell organization and biogenesis	cytoplasm;cytoskeleton;membrane	protein binding;structural molecule activity	Pf00373, Pf01608, Pf02174, Pf08913, Pf09141, Pf09379	0.989	0.996	0.959	0.937	0.966	0.969	0.925	0.928	1.037	1.034	0.973	0.956	0.962	0.971	1.002	1.005	0.926	0.929	0.991	0.994	0.965	0.951	0.95	0.941	0.98	0.98	1.024	1.026	1.013
Master Protein	Q8BPN8	DmX-like protein 2 OS=Mus musculus GN=Dmxl2 PE=1 SV=3	Dmxl2	235380	ENSMUSG00000041268	High	FALSE	140	2610	136	0	1184.13	10371.6	51.847	45.639	9		membrane	protein binding	Pf00400, Pf12234	1.009	1.021	0.99	0.981	1.024	1.013	0.926	0.94	0.987	0.987	0.964	0.957	0.991	1.019	1.004	1.02	0.94	0.947	0.963	0.966	0.955	0.95	0.927	0.924	0.999	1	1.013	1.014	1.039
Master Protein	P19096	Fatty acid synthase OS=Mus musculus GN=Fasn PE=1 SV=2	Fasn	14104	ENSMUSG00000025153	High	FALSE	120	2727	120	0	1165.94	10625.4	62.4201	70.626	11	cell differentiation;metabolic process;response to stimulus	cytoplasm;Golgi;membrane;mitochondrion	catalytic activity;nucleotide binding;protein binding;RNA binding	Pf00106, Pf00107, Pf00109, Pf00550, Pf00698, Pf00975, Pf02801, Pf08241, Pf08242, Pf08659, Pf12847, Pf13489, Pf13602, Pf13847, Pf14765	0.904	0.901	0.886	0.876	0.921	0.925	0.969	0.974	0.989	0.988	1.012	1.003	0.882	0.884	0.927	0.928	0.84	0.835	0.961	0.965	0.977	0.976	0.992	0.993	0.92	0.93	0.915	0.917	0.939
Master Protein	Q3UGX2	Spectrin beta 1 OS=Mus musculus GN=Sptb PE=1 SV=1	Spnb1; Sptb	20741	ENSMUSG00000021061	High	FALSE	146	1973	1	0	1152.75	7514.3	69.8154	38.701	12	cell organization and biogenesis;metabolic process;regulation of biological process	cell surface;cytoplasm;cytoskeleton;membrane	protein binding;structural molecule activity	Pf00169, Pf00307, Pf00435, Pf11971, Pf13514, Pf15410		1.537	0.638	0.652	0.936	0.978	0.672	0.583		1.252	0.534	0.629		1.04		1.576	0.737	0.751		0.837	0.827	0.838	0.879	0.876	0.94	0.947		0.804	0.825
Master Protein	Q8VDD5	Myosin-9 OS=Mus musculus GN=Myh9 PE=1 SV=4	Myh9	17886	ENSMUSG00000022443	High	FALSE	145	2350	116	0	1151.44	9365.38	62.8571	134.451	15	cell differentiation;cell organization and biogenesis;cellular component movement;metabolic process;regulation of biological process;transport	cytoplasm;cytoskeleton;cytosol;extracellular;membrane;nucleus	catalytic activity;motor activity;nucleotide binding;protein binding;RNA binding;transporter activity	Pf00063, Pf01442, Pf01496, Pf01576, Pf01765, Pf02463, Pf02736, Pf03962, Pf04111, Pf04156, Pf05667, Pf05911, Pf06160, Pf06637, Pf07111, Pf07888, Pf08317, Pf09726, Pf09731, Pf10498, Pf11559, Pf11917, Pf12128, Pf13094, Pf13166	0.95	0.958	0.869	0.852	0.947	0.945	0.911	0.932	0.972	0.985	0.944	0.93	0.967	0.967	0.949	0.954	0.898	0.901	0.969	0.973	0.949	0.944	0.891	0.886	0.944	0.956	0.982	0.99	0.98
Master Protein	B2RX08	Spectrin beta 1 OS=Mus musculus GN=Sptb PE=2 SV=1	Spnb1; Sptb	20741		High	FALSE	146	1966	1	0	1150.42	7492.06	69.8154	38.157	12	cell organization and biogenesis;metabolic process;regulation of biological process	cell surface;cytoplasm;cytoskeleton;membrane	protein binding;structural molecule activity	Pf00169, Pf00307, Pf00435, Pf11971, Pf13514, Pf15410	1.023	1.039	0.997	0.989	1.082	1.061	0.843	0.851	0.972	0.971	0.912	0.916	1.037	1.076	1.047	1.061	1	0.98	0.974	0.982	0.9	0.899	0.918	0.915	0.936	0.939	0.994	1.009	1.013
Master Protein	W6PPR4	480-kDa ankyrinG OS=Mus musculus GN=Ank3 PE=4 SV=1	Ank3	11735		High	FALSE	163	1884	79	0	1143.56	7135.46	43.952	9	10	cell organization and biogenesis;cellular component movement;regulation of biological process;response to stimulus;transport	cell surface;cytoplasm;cytoskeleton;endoplasmic reticulum;membrane;vacuole	protein binding;structural molecule activity	Pf00023, Pf00531, Pf00791, Pf12796, Pf13606, Pf13637, Pf13857	1.025	0.995	0.952	0.938	1.023	1.022	0.924	0.916	1.029	1.004	0.935	0.938	1.029	1.016	1.028	0.99	0.921	0.902	1.034	1.011	0.931	0.945	0.943	0.946	1.005	1.012	1.053	1.028	1.025
Master Protein	D3Z4J3	Unconventional myosin-Va OS=Mus musculus GN=Myo5a PE=1 SV=1	Myo5a	17918	ENSMUSG00000034593	High	FALSE	144	2872	132	0	1133.84	10570.8	60.1078	236.137	9	cell communication;cell differentiation;cell organization and biogenesis;cellular component movement;metabolic process;regulation of biological process;response to stimulus;transport	cytoplasm;cytoskeleton;cytosol;endoplasmic reticulum;endosome;extracellular;Golgi;membrane;vacuole	catalytic activity;metal ion binding;motor activity;nucleotide binding;protein binding;RNA binding	Pf00063, Pf00261, Pf00612, Pf00769, Pf01442, Pf01843, Pf02463, Pf04111, Pf04156, Pf05483, Pf05557, Pf05622, Pf06160, Pf06548, Pf06705, Pf07028, Pf07888, Pf07926, Pf08317, Pf09311, Pf09726, Pf10174, Pf12128	1.002	1.001	0.963	0.945	0.968	0.948	0.945	0.949	1	0.999	0.99	0.973	0.949	0.953	1.017	1.016	0.965	0.966	1.007	1.005	0.975	0.964	0.954	0.944	0.99	0.974	1.032	1.031	1.036
Master Protein	S4R2H6	Ankyrin-2 OS=Mus musculus GN=Ank2 PE=1 SV=1	Ank2		ENSMUSG00000032826	High	FALSE	110	3107	1	0	1067.24	12588.9	66.7207	127.265	3	regulation of biological process;response to stimulus		protein binding	Pf00023, Pf00531, Pf00791, Pf12796, Pf13606, Pf13637, Pf13857	0.995	0.972	0.831	0.995	1.002	0.997	0.922	0.987	0.943	0.979	0.81	0.901	0.919	0.948	1.017	1.002	0.893	0.915	0.91	0.95	0.861	0.932	0.813	0.907	0.95	0.985	0.924	0.977	1.034
Master Protein	Q6ZQ49	MCG142115, isoform CRA_b (Fragment) OS=Mus musculus GN=Atp1a2 PE=2 SV=1	Atp1a2	98660		High	FALSE	90	11265	59	0	1019.16	47749.6	63.6986	8857.67	1	cellular homeostasis;metabolic process;regulation of biological process;response to stimulus;transport	cytoplasm;endosome;membrane	catalytic activity;metal ion binding;nucleotide binding;protein binding;transporter activity	Pf00122, Pf00689, Pf00690, Pf00702, Pf08282, Pf12710, Pf13246	0.913	0.922	0.903	0.887	0.931	0.913	0.967	0.976	0.973	0.985	0.98	0.978	0.891	0.906	0.905	0.91	0.887	0.89	0.933	0.937	0.939	0.942	0.93	0.931	0.954	0.95	0.966	0.975	0.96
Master Protein	P39053-4	Isoform 4 of Dynamin-1 OS=Mus musculus GN=Dnm1	Dnm1	13429	ENSMUSG00000026825	High	FALSE	91	6175	2	0	994.199	22884.4	88.5417	6994.64	2	cell communication;cell organization and biogenesis;metabolic process;regulation of biological process;response to stimulus;transport	cytoplasm;cytoskeleton;Golgi;membrane	catalytic activity;nucleotide binding;protein binding;RNA binding	Pf00169, Pf00350, Pf01031, Pf02212	1.018	1.029	0.983	0.962	1.022	1.02	0.928	0.935	1.027	1.032	0.968	0.964	1.028	1.034	1.025	1.026	0.941	0.945	0.99	0.992	0.95	0.944	0.976	0.966	0.975	0.977	1.029	1.032	1.035
Master Protein	P39053-3	Isoform 3 of Dynamin-1 OS=Mus musculus GN=Dnm1	Dnm1	13429	ENSMUSG00000026825	High	FALSE	88	6352	2	0	973.612	23653	86.0165	5297.32	2	cell communication;cell organization and biogenesis;metabolic process;regulation of biological process;response to stimulus;transport	cytoplasm;cytoskeleton;Golgi;membrane	catalytic activity;nucleotide binding;protein binding;RNA binding	Pf00169, Pf00350, Pf01031, Pf02212	0.997	0.974	0.935	0.938	0.976	0.982	0.938	0.99	0.959	0.943	0.976	0.99	1.005	0.934	0.97	0.941	0.919	0.967	0.909	0.902	0.916	0.934	0.941	0.975	0.929	0.938	0.991	0.977	1.016
Master Protein	P11499	Heat shock protein HSP 90-beta OS=Mus musculus GN=Hsp90ab1 PE=1 SV=3	Hsp90ab1	15516	ENSMUSG00000023944	High	FALSE	84	7960	24	0	966.817	31625.4	82.7348	61757.6	17	cell organization and biogenesis;metabolic process;regulation of biological process;response to stimulus	cell surface;cytoplasm;cytosol;membrane;mitochondrion	enzyme regulator activity;nucleotide binding;protein binding;RNA binding	Pf00183, Pf02518, Pf13589	0.966	0.976	0.909	0.891	0.967	0.97	0.98	0.982	1.019	1.028	1.046	1.03	0.958	0.974	0.97	0.977	0.864	0.864	1.031	1.033	1.015	1.007	0.964	0.952	0.986	0.995	1.06	1.061	1.028
Master Protein	P63017	Heat shock cognate 71 kDa protein OS=Mus musculus GN=Hspa8 PE=1 SV=1	Hspa8	15481	ENSMUSG00000015656	High	FALSE	85	8865	62	0	958.971	37416.9	95.2012	366523	9	cell organization and biogenesis;metabolic process;regulation of biological process;transport	cell surface;cytoplasm;cytosol;endosome;membrane;nucleus;spliceosomal complex;vacuole	catalytic activity;nucleotide binding;protein binding;RNA binding	Pf00012, Pf02463, Pf06723	0.974	0.986	0.951	0.935	0.964	0.973	0.981	0.973	0.994	1.003	1.017	1.006	0.959	0.971	0.977	0.983	0.894	0.888	1.011	1.014	0.986	0.974	0.955	0.948	0.979	0.994	1.026	1.029	1.023
Master Protein	P39053-6	Isoform 6 of Dynamin-1 OS=Mus musculus GN=Dnm1	Dnm1	13429	ENSMUSG00000026825	High	FALSE	87	5953	1	0	955.043	22028.3	86.4583	4892.9	2	cell communication;cell organization and biogenesis;metabolic process;regulation of biological process;response to stimulus;transport	cytoplasm;cytoskeleton;Golgi;membrane	catalytic activity;nucleotide binding;protein binding;RNA binding	Pf00169, Pf00350, Pf01031, Pf02212		0.981	1.003	1.095	1.189	1.133	0.904			0.92	0.962	0.886		1.119		1.094	0.886			0.899	0.902	0.879	0.956	0.934	1.092	1.056		1.003	1.01
Master Protein	P46460	Vesicle-fusing ATPase OS=Mus musculus GN=Nsf PE=1 SV=2	Nsf	18195	ENSMUSG00000034187	High	FALSE	82	7452	81	0	947.686	28183.1	89.7849	9181.54	11	cell organization and biogenesis;metabolic process;regulation of biological process;response to stimulus;transport	cytoplasm;membrane	catalytic activity;metal ion binding;nucleotide binding;protein binding;RNA binding	Pf00004, Pf00910, Pf01078, Pf02359, Pf02933, Pf05272, Pf05496, Pf06068, Pf07724, Pf07728, Pf13173, Pf13191, Pf13207, Pf13401	1.027	1.012	0.989	0.978	1.019	1.009	0.904	0.886	1.005	0.982	0.972	0.963	1.008	0.989	1.049	1.032	0.966	0.968	0.972	0.956	0.953	0.951	0.95	0.943	0.967	0.967	1.025	1.009	1.033
Master Protein	P56480	ATP synthase subunit beta, mitochondrial OS=Mus musculus GN=Atp5b PE=1 SV=2	Atp5b	11947	ENSMUSG00000025393	High	FALSE	50	12754	50	0	936.261	55023.5	87.7127	282886	10	cell differentiation;cellular homeostasis;metabolic process;regulation of biological process;transport	cell surface;membrane;mitochondrion;nucleus	catalytic activity;metal ion binding;nucleotide binding;protein binding;receptor activity;transporter activity	Pf00006, Pf00306, Pf02874	1.026	1.02	0.946	0.941	1.028	1.022	0.902	0.913	1.015	1.009	0.955	0.954	1.052	1.051	1.01	1.001	0.877	0.886	0.97	0.967	0.937	0.94	0.905	0.911	1.023	1.008	1.019	1.015	1.019
Master Protein	Q80Y52	Heat shock protein 90, alpha (Cytosolic), class A member 1 OS=Mus musculus GN=Hsp90aa1 PE=2 SV=2	Hsp90aa1	15519	ENSMUSG00000021270	High	FALSE	77	7812	12	0	928.907	30081.7	76.3984	54712.6	12	cell death;cell organization and biogenesis;cellular component movement;metabolic process;regulation of biological process;response to stimulus;transport	cell surface;cytoplasm;cytosol;membrane;nucleus	catalytic activity;enzyme regulator activity;nucleotide binding;protein binding;RNA binding	Pf00183, Pf02518, Pf13589	0.952	0.95	0.948	0.918	0.954	0.93	1.037	1.029	1.01	1.014	1.074	1.057	0.929	0.929	0.945	0.937	0.905	0.901	1.006	1.01	1.017	1.006	1.014	1.001	0.994	0.982	1.055	1.063	1.056
Master Protein	Q80TJ1-4	Isoform 4 of Calcium-dependent secretion activator 1 OS=Mus musculus GN=Cadps	Cadps	27062		High	FALSE	81	2585	1	0	902.184	9976.31	67.4315	349.19	14	cell organization and biogenesis;regulation of biological process;transport	membrane	metal ion binding;protein binding	Pf00169, Pf06292	0.992	1.008	0.99	0.969	1.035	1.028	0.916	0.927	0.965	0.976	0.966	0.943	1.003	1.022	1.005	1.01	0.952	0.956	0.956	0.971	0.949	0.93	0.948	0.927	0.966	0.969	1.007	1.017	1.028
Master Protein	Q80TJ1	Calcium-dependent secretion activator 1 OS=Mus musculus GN=Cadps PE=1 SV=3	Cadps	27062	ENSMUSG00000054423	High	FALSE	81	2570	1	0	892.972	9908.44	67.4539	329.36	14	cell organization and biogenesis;regulation of biological process;transport	membrane	metal ion binding;protein binding	Pf00169, Pf06292				0.998		0.87	0.839					0.846					0.78					0.945		0.986		0.942
Master Protein	P26039	Talin-1 OS=Mus musculus GN=Tln1 PE=1 SV=2	Tln1	21894	ENSMUSG00000028465	High	FALSE	127	1203	104	0	890.106	4843.69	61.2751	17.912	4	cell organization and biogenesis	cell surface;cytoplasm;cytoskeleton;membrane	protein binding;structural molecule activity	Pf00373, Pf01608, Pf02174, Pf08913, Pf09141, Pf09379	0.93	0.903	0.843	0.832	0.883	0.893	0.9	0.884	1.017	0.983	0.938	0.933	0.928	0.908	0.937	0.905	0.829	0.818	0.985	0.968	0.947	0.945	0.895	0.885	0.902	0.905	0.999	0.97	0.904
Master Protein	Q8BX70	Vacuolar protein sorting-associated protein 13C OS=Mus musculus GN=Vps13c PE=1 SV=2	Vps13c	320528	ENSMUSG00000035284	High	FALSE	132	1080	131	0	880.518	4148.14	44.6371	7.83	9	transport			Pf06650, Pf12624	1.025	1	0.922	0.904	1.024	1.022	0.896	0.903	1.032	1.005	0.962	0.959	1.047	1.003	1.016	0.991	0.876	0.879	0.997	0.973	0.946	0.935	0.921	0.91	0.985	0.994	1.034	1	1.026
Master Protein	Q69ZX3	MKIAA0866 protein (Fragment) OS=Mus musculus GN=Myh11 PE=2 SV=1	Myh11	17880		High	FALSE	118	1365	86	0	879.995	5325.69	57.5605	38.667	16	cell differentiation;cell organization and biogenesis;metabolic process;transport	cytoplasm;extracellular	catalytic activity;motor activity;nucleotide binding;protein binding;structural molecule activity	Pf00038, Pf00063, Pf01442, Pf01576, Pf02463, Pf02736, Pf04111, Pf04156, Pf07111, Pf07888, Pf09726, Pf09731, Pf10079, Pf12128, Pf12252, Pf12325, Pf13166	1.033	1.048	0.944	0.935	0.83	0.814	0.854	0.878	1.083	1.105	0.84	0.84	1.076	1.112	0.984	1.003	1.093	1.102	0.917	0.904	0.939	0.931	0.737	0.734	0.884	0.888	1.243	1.284	0.912
Master Protein	A2AN08-5	Isoform 5 of E3 ubiquitin-protein ligase UBR4 OS=Mus musculus GN=Ubr4	Ubr4			High	FALSE	135	824	135	0	878.409	3257.67	35.1767	4.137				metal ion binding	Pf02207, Pf13764	0.962	0.993	0.926	0.896	0.965	0.977	0.935	0.939	0.995	1.01	0.965	0.954	0.966	0.995	0.976	0.998	0.915	0.903	0.989	0.995	0.956	0.93	0.949	0.932	0.962	0.98	0.998	1.005	0.981
Master Protein	E9PX29	Protein Sptbn4 OS=Mus musculus GN=Sptbn4 PE=1 SV=1	Spnb4; Sptbn4	80297	ENSMUSG00000011751	High	FALSE	134	1296	128	0	877.122	5183.79	64.8965	13.874	7	cell organization and biogenesis;regulation of biological process;response to stimulus	cytoplasm;membrane	protein binding;structural molecule activity	Pf00169, Pf00307, Pf00435, Pf11971, Pf15410	1	0.997	0.917	0.903	1.006	1.005	0.902	0.909	1.01	1.006	0.911	0.916	1.006	1.018	1.02	1.016	0.908	0.896	0.997	0.988	0.903	0.915	0.917	0.916	1.011	1.003	1.028	1.015	1.006
Master Protein	Q80TJ1-2	Isoform 2 of Calcium-dependent secretion activator 1 OS=Mus musculus GN=Cadps	Cadps	27062	ENSMUSG00000054423	High	FALSE	77	2515	1	0	862.107	9673.24	64.2175	310.535	14	cell organization and biogenesis;regulation of biological process;transport	membrane	metal ion binding;protein binding	Pf00169, Pf06292	1.026	0.997	0.894	0.898	1.032	1.026	0.856	0.783	1.088	1.04	0.801	0.909	1.084	1.081	1.046	1.043	0.91	0.876	1.093	1.084	0.833	0.91	0.882	0.913	1.023	0.989	1.148	1.121	1.083
Master Protein	Q5SWR1	Putative uncharacterized protein OS=Mus musculus GN=Ap2b1 PE=2 SV=1	Ap2b1	71770	ENSMUSG00000035152	High	FALSE	70	4107	39	0	856.496	16199.7	70.9779	3800.89	11	cell organization and biogenesis;transport	membrane	protein binding;transporter activity	Pf01602, Pf02883, Pf09066, Pf12717, Pf13646	0.992	0.971	1	0.991	0.986	0.987	0.933	0.932	0.978	0.946	0.973	0.97	1	0.972	1.002	0.977	0.968	0.958	0.968	0.939	0.976	0.967	0.958	0.956	0.955	0.972	0.999	0.971	1
Master Protein	Q9EPN1	Neurobeachin OS=Mus musculus GN=Nbea PE=2 SV=1	Nbea	26422	ENSMUSG00000027799	High	FALSE	108	1136	100	0	846.084	4363.39	48.7398	13.175	3	transport	cytosol;membrane	protein binding	Pf02138, Pf06469, Pf13385, Pf14844	1.003	1.008	0.953	0.954	1.003	0.992	0.921	0.933	0.99	1.003	0.966	0.965	0.981	0.992	0.991	1.001	0.949	0.932	1.013	1.031	0.96	0.974	0.961	0.976	0.939	0.941	1.004	1.016	1.004
Master Protein	O08788	Dynactin subunit 1 OS=Mus musculus GN=Dctn1 PE=1 SV=3	Dctn1	13191	ENSMUSG00000031865	High	FALSE	84	1637	7	0	843.371	6925.05	68.306	264.863	6	cell organization and biogenesis;cellular component movement;metabolic process;regulation of biological process;transport	chromosome;cytoplasm;cytoskeleton;cytosol;membrane	catalytic activity;motor activity;protein binding	Pf01302, Pf05622, Pf05667, Pf06160, Pf12128, Pf12455, Pf13166, Pf15035	1	1.003	0.925	0.914	0.989	0.994	0.916	0.941	1.053	1.047	0.984	0.995	1.001	0.988	0.998	0.998	0.874	0.884	1.083	1.075	0.952	0.962	0.956	0.962	0.983	0.998	1.061	1.046	1.022
Master Protein	O08599	Syntaxin-binding protein 1 OS=Mus musculus GN=Stxbp1 PE=1 SV=2	Stxbp1	20910	ENSMUSG00000026797	High	FALSE	68	6780	4	0	840.921	27077.6	87.8788	14423.2	2	cell communication;cell organization and biogenesis;regulation of biological process;transport	cytoplasm;cytosol;membrane;mitochondrion	protein binding;RNA binding	Pf00995	0.97	0.963	0.979	0.96	0.944	0.946	0.951	0.934	1.063	1.048	1	0.988	0.993	0.985	0.967	0.961	0.899	0.899	1.076	1.056	0.999	0.994	1.003	0.998	1.066	1.068	1.081	1.07	1.049
Master Protein	O08599-2	Isoform 2 of Syntaxin-binding protein 1 OS=Mus musculus GN=Stxbp1	Stxbp1	20910	ENSMUSG00000026797	High	FALSE	67	6749	3	0	835.615	26979.4	84.4113	12989.8	2	cell communication;cell organization and biogenesis;regulation of biological process;transport	cytoplasm;membrane;mitochondrion	protein binding;RNA binding	Pf00995	0.951	0.903	0.872	0.883	1.077	1.021	0.846	0.878	1.089	1.009	0.866	0.874	0.941	0.868	0.953	0.941	0.791	0.81	0.958	0.896	0.869	0.873	0.868	0.877	1.059	0.946	1.024	0.93	0.995
Master Protein	Q8VDN2	Sodium/potassium-transporting ATPase subunit alpha-1 OS=Mus musculus GN=Atp1a1 PE=1 SV=1	Atp1a1	11928	ENSMUSG00000033161	High	FALSE	75	9964	36	0	832.644	43221.5	60.2151	2214.41	3	cellular homeostasis;metabolic process;regulation of biological process;response to stimulus;transport	endoplasmic reticulum;endosome;Golgi;membrane	catalytic activity;metal ion binding;nucleotide binding;protein binding;transporter activity	Pf00122, Pf00689, Pf00690, Pf00702, Pf08282, Pf12710, Pf13246	0.983	0.982	0.938	0.919	0.962	0.958	0.895	0.903	1.017	1.022	0.946	0.936	0.957	0.957	0.973	0.97	0.909	0.918	1.147	1.156	0.957	0.949	0.957	0.952	1.033	1.033	1.052	1.052	1.043
Master Protein	G5E829	Calcium-transporting ATPase OS=Mus musculus GN=Atp2b1 PE=1 SV=1	Atp2b1	67972	ENSMUSG00000019943	High	FALSE	82	3973	42	0	830.171	14994.1	56.3115	473.756	10	cell communication;cellular homeostasis;metabolic process;response to stimulus;transport	membrane;nucleus	catalytic activity;metal ion binding;nucleotide binding;protein binding;transporter activity	Pf00122, Pf00689, Pf00690, Pf00702, Pf08282, Pf12424, Pf12710, Pf13246	0.996	1.012	1.019	1.02	1.023	1.023	0.963	0.972	0.957	0.961	0.957	0.954	0.989	1.006	0.984	0.989	1.024	1.024	0.982	0.986	0.974	0.984	0.952	0.957	0.949	0.957	0.974	0.979	1.019
Master Protein	P52480-2	Isoform M1 of Pyruvate kinase PKM OS=Mus musculus GN=Pkm	Pkm	18746	ENSMUSG00000032294	High	FALSE	66	11340	4	0	821.439	47905.6	84.3691	26365.5	9	cell death;metabolic process	cytoplasm;membrane;mitochondrion;nucleus	catalytic activity;metal ion binding;nucleotide binding;protein binding;RNA binding	Pf00224, Pf02887	0.897	0.941	0.873	0.863	0.905	0.932	0.875	0.889	0.961	1.006	0.916	0.907	0.834	0.894	0.937	0.969	0.836	0.834	0.92	0.951	0.885	0.891	0.896	0.893	0.888	0.915	0.924	0.958	0.914
Master Protein	Q68FD6	Tln2 protein OS=Mus musculus GN=Tln2 PE=2 SV=1	Tln2	70549		High	FALSE	95	1297	3	0	816.852	5238.21	68.7887	34.622	9	cell organization and biogenesis	cytoplasm;cytoskeleton;membrane	protein binding;structural molecule activity	Pf01608, Pf08913, Pf09141	0.977	1.05	0.947	0.982	0.979	1.043	0.915	0.9	1.04	1.119	0.999	1.021	0.949	1.07	0.939	0.984	0.93	0.9	1.002	1.049	0.992	0.998	0.821	0.875	0.962	1.078	1.006	1.021	1.009
Master Protein	Q7TSJ2	Microtubule-associated protein 6 OS=Mus musculus GN=Map6 PE=1 SV=2	Map6; Mtap6	17760	ENSMUSG00000055407	High	FALSE	90	2451	90	0	812.911	10110.2	89.1832	507.022	7	cell organization and biogenesis;transport	cytoplasm;cytoskeleton;Golgi	protein binding	Pf05217	1.013	1.005	0.883	0.873	0.878	0.865	0.965	0.966	1.086	1.066	0.894	0.89	0.851	0.843	0.98	0.959	0.837	0.835	1.148	1.127	1.002	1.005	1.007	1.012	1.117	1.134	1.134	1.113	1.113
Master Protein	Q9Z1B3	1-phosphatidylinositol 4,5-bisphosphate phosphodiesterase beta-1 OS=Mus musculus GN=Plcb1 PE=2 SV=2	Plcb1	18795	ENSMUSG00000051177	High	FALSE	80	1754	79	0	810.638	7177.42	64.227	431.876	2	cell differentiation;metabolic process;regulation of biological process;response to stimulus	cytoplasm;cytosol;membrane;nucleus	catalytic activity;enzyme regulator activity;metal ion binding;protein binding;signal transducer activity	Pf00168, Pf00387, Pf00388, Pf08703, Pf09279	1.025	1.034	1.035	1.012	1.017	1.041	0.904	0.903	1.022	1.016	0.988	0.974	1.048	1.06	1.017	1.032	0.982	0.97	1.125	1.114	0.996	0.98	0.978	0.963	0.981	1.006	1.107	1.099	1.067
Master Protein	Q3TB96	Putative uncharacterized protein OS=Mus musculus GN=Dctn1 PE=2 SV=1	Dctn1	13191		High	FALSE	81	1542	4	0	804.652	6420.49	70.2986	228.674	6	cell organization and biogenesis;cellular component movement;transport	chromosome;cytoplasm;cytoskeleton;membrane	catalytic activity;motor activity;protein binding	Pf01302, Pf05622, Pf05667, Pf06160, Pf12128, Pf12455, Pf15035	1.257	1.199	0.792	0.815		1.197	0.936	1.287	1.29	1.367	0.842	0.833	0.626	0.624	1.268	1.192	0.831	0.857	1.416	1.342	0.813	0.814	0.777	0.803		0.657	1.003	1.054
Master Protein	P52480	Pyruvate kinase PKM OS=Mus musculus GN=Pkm PE=1 SV=4	Pkm	18746	ENSMUSG00000032294	High	FALSE	67	10711	5	0	803.192	46692.6	83.8041	23897.9	9	cell death;metabolic process	cytoplasm;membrane;mitochondrion;nucleus	catalytic activity;metal ion binding;nucleotide binding;protein binding;RNA binding	Pf00224, Pf02887	0.896	0.9	0.933	0.921	0.914	0.923	0.948	0.954	0.963	0.956	0.981	0.986	0.902	0.913	0.913	0.918	0.872	0.87	0.929	0.922	0.963	0.96	0.977	0.974	0.937	0.948	0.958	0.95	0.955
Master Protein	P63038	60 kDa heat shock protein, mitochondrial OS=Mus musculus GN=Hspd1 PE=1 SV=1	Hspd1	15510	ENSMUSG00000025980	High	FALSE	56	4598	56	0	783.363	20940.9	84.6422	26100.6	1	cell organization and biogenesis;cell proliferation;metabolic process;regulation of biological process;response to stimulus	cell surface;cytoplasm;cytosol;endoplasmic reticulum;endosome;Golgi;membrane;mitochondrion;organelle lumen	nucleotide binding;protein binding;RNA binding	Pf00118	0.984	1.013	0.962	0.947	0.988	0.994	0.968	0.973	1.03	1.057	1.059	1.049	1.003	1.042	0.957	0.979	0.892	0.894	0.968	0.994	1.003	1.001	0.986	0.983	1.048	1.056	1.019	1.045	1.037
Master Protein	P58281-2	Isoform 2 of Dynamin-like 120 kDa protein, mitochondrial OS=Mus musculus GN=Opa1	Opa1	74143	ENSMUSG00000038084	High	FALSE	82	1768	82	0	782.695	6976.99	74.0221	427.897	16	cell death;cell organization and biogenesis;regulation of biological process;response to stimulus	cytoplasm;membrane;mitochondrion	catalytic activity;nucleotide binding;protein binding	Pf00350, Pf01926	1.008	1.01	0.987	0.985	1.049	1.06	0.915	0.935	1.029	1.032	0.99	0.983	1.04	1.042	1.015	1.012	0.932	0.947	1.018	1.031	0.941	0.968	0.929	0.943	0.998	1.012	1.043	1.052	1.031
Master Protein	P12960	Contactin-1 OS=Mus musculus GN=Cntn1 PE=1 SV=1	Cntn1	12805	ENSMUSG00000055022	High	FALSE	65	3445	65	0	779.777	14191.2	65.4902	684.592	15	cell organization and biogenesis;regulation of biological process;response to stimulus	membrane	protein binding	Pf00041, Pf00047, Pf07679, Pf07686, Pf13895, Pf13927	0.973	0.97	0.958	0.934	0.954	0.979	0.898	0.917	1.002	0.992	0.952	0.937	0.958	0.961	0.998	0.992	0.932	0.939	1.004	0.999	0.926	0.912	0.93	0.912	0.941	0.977	1.021	1.017	0.978
Master Protein	A2AS98	Nck-associated protein 1 OS=Mus musculus GN=Nckap1 PE=4 SV=1	Nckap1	50884	ENSMUSG00000027002	High	FALSE	69	2461	67	0	778.319	8413.29	64.1975	373.567	2	cell organization and biogenesis;cellular component movement;regulation of biological process;response to stimulus	cytoplasm;membrane	protein binding	Pf09735	1.04	1.038	0.948	0.934	0.982	1.002	0.898	0.896	1.004	0.991	0.955	0.956	0.923	0.921	1.043	1.035	0.973	0.97	1.023	1.007	0.96	0.952	0.943	0.937	0.943	0.968	1.019	1.01	0.999
Master Protein	P08553	Neurofilament medium polypeptide OS=Mus musculus GN=Nefm PE=1 SV=4	Nefm	18040		High	FALSE	92	4081	85	0	773.101	15223.8	75.9434	2370.37	14	cell organization and biogenesis;cellular component movement;regulation of biological process;transport	cytoskeleton	protein binding;structural molecule activity	Pf00038, Pf07888, Pf10186, Pf10498, Pf12128, Pf13166	0.918	0.915	0.899	0.884	0.94	0.948	1.077	1.072	1.049	1.037	0.927	0.921	0.888	0.889	0.985	0.984	0.801	0.799	1.03	1.032	0.901	0.898	0.873	0.866	1.089	1.093	0.998	0.985	1.014
Master Protein	O08553	Dihydropyrimidinase-related protein 2 OS=Mus musculus GN=Dpysl2 PE=1 SV=2	Dpysl2	12934	ENSMUSG00000022048	High	FALSE	56	12268	49	0	767.897	53312.8	85.1399	36208.6	14	cell differentiation;cell organization and biogenesis;cellular component movement;development;metabolic process;regulation of biological process;response to stimulus;transport	cytoplasm;cytoskeleton;cytosol;membrane;mitochondrion	catalytic activity;protein binding	Pf01979, Pf07969, Pf13147, Pf13594	0.957	0.959	0.911	0.903	0.954	0.956	0.907	0.912	0.986	0.982	0.945	0.945	0.97	0.976	0.965	0.966	0.849	0.848	0.997	0.996	0.952	0.955	0.959	0.96	1.002	1.008	1.012	1.012	0.998
Master Protein	Q5DTI2	ATPase, Ca++ transporting, cardiac muscle, slow twitch 2, isoform CRA_b (Fragment) OS=Mus musculus GN=Atp2a2 PE=2 SV=1	Atp2a2	11938		High	FALSE	63	2761	40	0	763.63	11056.3	51.6494	1041.75	5	cell organization and biogenesis;cellular homeostasis;metabolic process;regulation of biological process;response to stimulus;transport	cytoplasm;endoplasmic reticulum;membrane	catalytic activity;metal ion binding;nucleotide binding;protein binding;transporter activity	Pf00122, Pf00689, Pf00690, Pf00702, Pf08282, Pf12710, Pf13246	0.954	0.957	1.034	1.026	0.955	0.988	0.955	0.951	0.923	0.921	1.001	1.006	0.949	0.958	0.955	0.955	1.002	0.986	0.931	0.931	0.959	0.967	0.97	0.977	0.933	0.964	0.944	0.952	0.971
Master Protein	Q9JMH9-6	Isoform 6 of Unconventional myosin-XVIIIa OS=Mus musculus GN=Myo18a	Myo18a		ENSMUSG00000000631	High	FALSE	111	1079	111	0	760.647	4249.24	55.2376	18.587	11	cell differentiation;cell organization and biogenesis;cellular component movement;metabolic process;regulation of biological process;transport	cytoplasm;cytoskeleton;Golgi	catalytic activity;motor activity;nucleotide binding;protein binding;structural molecule activity;transporter activity	Pf00038, Pf00063, Pf00595, Pf00769, Pf01496, Pf01576, Pf02463, Pf02841, Pf03962, Pf04111, Pf04156, Pf04502, Pf04615, Pf05483, Pf05557, Pf05622, Pf05667, Pf05701, Pf05911, Pf06160, Pf07111, Pf07888, Pf09726, Pf09728, Pf09730, Pf09755, Pf09787, Pf10174, Pf12128, Pf12329, Pf12889, Pf13166, Pf13514, Pf13851, Pf15397	0.959	0.979	0.921	0.918	0.962	0.975	0.937	0.936	0.972	0.989	0.963	0.981	0.936	0.971	0.965	0.992	0.916	0.915	0.998	1.002	0.967	0.983	0.943	0.95	0.983	0.996	0.995	1.012	1.018
Master Protein	Q8CC13	Putative uncharacterized protein OS=Mus musculus GN=Ap1b1 PE=2 SV=1	Ap1b1	11764		High	FALSE	66	3053	1	0	755.311	11583.1	73.0325	1196.93	11	cell organization and biogenesis;transport	Golgi;membrane	protein binding;transporter activity	Pf01602, Pf02883, Pf09066, Pf12717, Pf13646	0.989	0.967	1.016	0.995	0.953	0.961	0.923	0.942	0.996	0.968	1	0.989	0.993	0.97	0.974	0.954	0.939	0.933	1.027	0.992	0.99	0.986	0.987	0.99	0.965	0.956	1.006	0.983	0.991
Master Protein	P50516	V-type proton ATPase catalytic subunit A OS=Mus musculus GN=Atp6v1a PE=1 SV=2	Atp6v1a	11964	ENSMUSG00000052459	High	FALSE	54	7882	54	0	752.154	30778.4	88.3306	8885.24	16	metabolic process;transport	cytosol;membrane;mitochondrion	catalytic activity;nucleotide binding;transporter activity	Pf00006, Pf00306, Pf02874	0.976	0.983	0.918	0.915	0.981	0.978	0.859	0.86	0.977	0.976	0.9	0.898	0.997	1.012	0.983	0.989	0.878	0.876	0.931	0.926	0.918	0.919	0.902	0.907	0.951	0.958	0.963	0.963	0.984
Master Protein	O35643	AP-1 complex subunit beta-1 OS=Mus musculus GN=Ap1b1 PE=2 SV=2	Ap1b1	11764	ENSMUSG00000009090	High	FALSE	66	3080	1	0	748.738	11680.8	73.4889	1144.05	11	cell organization and biogenesis;transport	Golgi;membrane	protein binding;transporter activity	Pf01602, Pf02883, Pf09066, Pf12717, Pf13646	1.013	1.046	0.934	0.989	0.975	0.961	0.909	0.985	1.017	1.021	0.972	0.99	0.998	1.022	1.045	1.033	0.942	0.947	1.01	1.011	0.966	0.991	0.91	0.983	1.018	1.007	1.006	1.002	0.99
Master Protein	B1AQX9	SRC kinase-signaling inhibitor 1 OS=Mus musculus GN=Srcin1 PE=1 SV=1	Srcin1	56013	ENSMUSG00000038453	High	FALSE	91	2013	3	0	746.509	7795.43	76.7461	120.433	11	cell organization and biogenesis;regulation of biological process;transport	cytoplasm;cytoskeleton;membrane	protein binding		1.052	1.045	0.942	0.933	1.004	1.003	0.921	0.916	1.068	1.056	0.939	0.929	0.982	0.979	1.025	1.012	0.922	0.921	1.07	1.058	0.965	0.966	0.937	0.923	0.999	1.008	1.066	1.057	1.052
Master Protein	O88935	Synapsin-1 OS=Mus musculus GN=Syn1 PE=1 SV=2	Syn1	20964	ENSMUSG00000037217	High	FALSE	56	6013	2	0	735.344	27164.5	82.7195	18076.7	X	metabolic process;regulation of biological process;transport	cytosol;Golgi;membrane	catalytic activity;nucleotide binding;protein binding	Pf02078, Pf02750, Pf08443, Pf10581	1.043	1.043	0.994	0.988	1.019	1.015	0.9	0.923	0.995	0.998	0.942	0.948	0.997	1.016	1.025	1.02	0.921	0.934	1.013	1.015	0.964	0.968	0.941	0.946	0.996	0.999	1.033	1.039	1.064
Master Protein	Q571M2	MKIAA4025 protein (Fragment) OS=Mus musculus GN=Hspa4 PE=2 SV=1	Hspa4	15525		High	FALSE	74	2361	70	0	732.022	9197.42	73.5484	492.797	11	cell organization and biogenesis;regulation of biological process;response to stimulus;transport	cytoplasm;cytosol;nucleus	nucleotide binding;protein binding	Pf00012, Pf06723	0.996	0.996	0.948	0.946	0.964	0.961	1.012	1.022	1.01	1.013	1.028	1.045	0.975	0.982	0.994	0.996	0.945	0.949	1.034	1.041	1.008	1.021	0.987	0.999	0.997	1.005	1.06	1.064	1.036
Master Protein	G5E8K5	Ankyrin-3 OS=Mus musculus GN=Ank3 PE=1 SV=1	Ank3	11735	ENSMUSG00000069601	High	FALSE	87	1407	1	0	726.531	5479.97	53.0852	23.816	10	cell organization and biogenesis;cellular component movement;regulation of biological process;response to stimulus;transport	cell surface;cytoplasm;cytoskeleton;endoplasmic reticulum;membrane;vacuole	protein binding;structural molecule activity	Pf00023, Pf00531, Pf00791, Pf12796, Pf13606, Pf13637, Pf13857	0.983					0.766	1.003	0.886	0.846				0.882		0.905		0.937	0.859	0.988							0.842	1.059
Master Protein	Q99KI0	Aconitate hydratase, mitochondrial OS=Mus musculus GN=Aco2 PE=1 SV=1	Aco2	11429	ENSMUSG00000022477	High	FALSE	64	4697	64	0	724.7	18828.5	63.0769	4902.16	15	metabolic process	mitochondrion;nucleus	catalytic activity;metal ion binding	Pf00330, Pf00694	0.997	0.996	0.979	0.971	1.003	1.011	0.926	0.933	0.995	0.989	0.989	0.976	0.953	0.951	0.986	0.976	0.921	0.922	0.967	0.962	0.94	0.934	0.95	0.937	0.999	1.018	0.992	0.99	1.016
Master Protein	B1AQX7	SRC kinase-signaling inhibitor 1 OS=Mus musculus GN=Srcin1 PE=1 SV=1	Srcin1	56013	ENSMUSG00000038453	High	FALSE	89	1990	1	0	724.222	7677.93	75.1252	96.327	11	cell organization and biogenesis;regulation of biological process;transport	cytoplasm;cytoskeleton;membrane	protein binding		1.013	0.983	0.973	0.976	1.078	1.061	0.968	0.928	1.037	0.99	0.981	0.95	0.974	1.009	1.073	1.115	1.074	0.944	1.127	1.105	1.008	1.03	0.945	0.926	0.994	1.024	1.065	1.068	1.062
Master Protein	A1BN54	Alpha actinin 1a OS=Mus musculus GN=Actn1 PE=2 SV=1	Actn1	109711	ENSMUSG00000015143	High	FALSE	66	2169	2	0	723.561	8453.45	81.398	373.775	12	cell differentiation;cell organization and biogenesis;regulation of biological process	cytoplasm;cytoskeleton;membrane;nucleus	metal ion binding;protein binding;RNA binding	Pf00307, Pf00435, Pf08726, Pf11971, Pf13499, Pf13833	0.847	0.855	1.06	1.058	0.894	0.912	1.122	0.999	0.984	0.846	1.042	1.089	0.821	0.846	0.987	0.835	1.244	1.103	0.832	0.907	1.069	1.085	0.984	1.02	0.906	0.905	1.025	0.958	0.992
Master Protein	Q6URW6-2	Isoform 2 of Myosin-14 OS=Mus musculus GN=Myh14	Myh14	71960	ENSMUSG00000030739	High	FALSE	109	1078	1	0	722.244	4149.22	55.1205	18.356	7	cell organization and biogenesis;cellular component movement;regulation of biological process;response to stimulus	cytoplasm;membrane	catalytic activity;motor activity;nucleotide binding;protein binding	Pf00063, Pf01576, Pf09726	0.933	0.934	0.829	0.811	0.942	0.95	0.874	0.873	1.009	1.005	0.923	0.933	0.908	0.926	0.968	0.956	0.845	0.848	0.97	0.963	0.877	0.868	0.886	0.892	0.982	0.984	0.976	0.97	0.952
Master Protein	Q6URW6	Myosin-14 OS=Mus musculus GN=Myh14 PE=1 SV=1	Myh14	71960	ENSMUSG00000030739	High	FALSE	109	1076	1	0	721.981	4143.34	55.3	18.014	7	cell organization and biogenesis;cellular component movement;metabolic process;regulation of biological process;response to stimulus	cytoplasm;membrane	catalytic activity;motor activity;nucleotide binding;protein binding	Pf00063, Pf01576, Pf09726					1.004																				0.933				0.919
Master Protein	F7BQW7	Synaptojanin-1 (Fragment) OS=Mus musculus GN=Synj1 PE=1 SV=1	Synj1		ENSMUSG00000022973	High	FALSE	77	2846	73	0	721.666	11167.3	69.0332	93.406	16	metabolic process		catalytic activity;nucleotide binding	Pf02383, Pf03372, Pf08952	1.035	1.036	0.979	0.97	1.001	1.005	0.929	0.935	1.001	1.002	0.967	0.965	1.002	1.013	1.029	1.034	0.928	0.932	0.94	0.937	0.962	0.971	0.949	0.951	0.973	0.987	1.015	1.02	1.017
Master Protein	F6SEU4	Ras/Rap GTPase-activating protein SynGAP OS=Mus musculus GN=Syngap1 PE=1 SV=2	Syngap1	240057	ENSMUSG00000067629	High	FALSE	68	2484	2	0	717.87	8937.92	59.5522	105.082	17	cell organization and biogenesis;regulation of biological process;response to stimulus	cytoplasm;membrane	enzyme regulator activity;protein binding	Pf00168, Pf00169, Pf00616, Pf02463, Pf04156, Pf09744, Pf12004, Pf12037	1.035	1.043	0.978	0.964	1.059	1.044	0.887	0.881	0.993	1.006	0.91	0.902	1.003	1.012	1.051	1.051	0.987	0.978	1.005	1.018	0.933	0.925	0.9	0.895	0.921	0.922	1.024	1.03	1.01
Master Protein	Q7TPR4	Alpha-actinin-1 OS=Mus musculus GN=Actn1 PE=1 SV=1	Actn1	109711	ENSMUSG00000015143	High	FALSE	67	2132	3	0	717.371	8361.29	81.7265	346.523	12	cell differentiation;cell organization and biogenesis;regulation of biological process	cytoplasm;cytoskeleton;membrane;nucleus	metal ion binding;protein binding;RNA binding	Pf00036, Pf00307, Pf00435, Pf08726, Pf11971, Pf13405, Pf13499	0.946	0.956	0.961	0.949	0.977	0.98	0.912	0.91	0.963	0.972	0.949	0.946	0.935	0.949	0.961	0.965	0.957	0.96	0.979	0.996	0.959	0.963	0.921	0.921	0.968	0.969	1.031	1.038	1.054
Master Protein	Q3V3U0	Phosphorylase OS=Mus musculus GN=Pygb PE=2 SV=1	Pygb	110078		High	FALSE	72	2898	57	0	715.241	11808.4	73.9027	810.131	2	metabolic process	cytoplasm;membrane	catalytic activity;protein binding	Pf00343	0.968	0.962	0.889	0.885	0.948	0.943	0.893	0.901	0.998	0.98	0.989	0.994	0.955	0.954	0.94	0.931	0.844	0.845	1.013	0.998	0.953	0.955	0.967	0.977	0.951	0.953	1.012	1.004	0.98
Master Protein	J3QQ18	Ras/Rap GTPase-activating protein SynGAP OS=Mus musculus GN=Syngap1 PE=1 SV=1	Syngap1		ENSMUSG00000067629	High	FALSE	67	2485	1	0	713.34	8962.77	60.474	111.884	17	regulation of biological process;response to stimulus		enzyme regulator activity;protein binding	Pf00168, Pf00169, Pf00616, Pf02463, Pf12004, Pf12037, Pf12718, Pf13863, Pf15346	1.014	1.07	0.927	0.882	1.18	1.125	0.853	0.861	1.022	1.064	0.812	0.796	0.971	1.124	1.069	1.148	1.023	1.015	1.008	1.045	0.848	0.855	0.81	0.782	0.971	0.941	1.056	1.064	1.074
Master Protein	E9Q616	Protein Ahnak OS=Mus musculus GN=Ahnak PE=1 SV=1	Ahnak	66395	ENSMUSG00000069833	High	FALSE	135	849	135	0	711.959	2604.17	53.4477	1.681	19	cell organization and biogenesis;regulation of biological process	cytoplasm;cytoskeleton;cytosol;membrane;nucleus	protein binding;RNA binding;structural molecule activity		0.861	0.85	0.773	0.763	0.813	0.812	0.877	0.86	1.015	1.021	0.894	0.884	0.897	0.866	0.876	0.86	0.777	0.753	0.964	0.964	0.917	0.906	0.779	0.777	0.852	0.86	1.079	1.074	0.885
Master Protein	P08551	Neurofilament light polypeptide OS=Mus musculus GN=Nefl PE=1 SV=5	Nefl	18039	ENSMUSG00000022055	High	FALSE	72	4882	67	0	707.084	19434.8	84.3462	6379.84	14	cell organization and biogenesis;cellular component movement;regulation of biological process;response to stimulus;transport	cytoplasm	catalytic activity;motor activity;protein binding;structural molecule activity	Pf00038, Pf01576	0.929	0.933	0.887	0.873	0.925	0.92	1.038	1.06	1.045	1.04	0.953	0.948	0.897	0.905	0.927	0.923	0.771	0.767	0.994	0.994	0.891	0.883	0.883	0.879	1.106	1.107	1.039	1.035	1.016
Master Protein	O88935-1	Isoform Ib of Synapsin-1 OS=Mus musculus GN=Syn1	Syn1	20964	ENSMUSG00000037217	High	FALSE	53	5968	1	0	706.327	26926.3	82.0896	12180.9	X	transport	cytosol;membrane	protein binding	Pf02078, Pf02750, Pf08443, Pf10581	1.214	1.25	0.865	0.857	1.097	1.072	0.657	0.72	0.876	0.837	0.724	0.645	1.045	1.081	1.137	1.197	0.809	0.894	1.009	1.09	0.859	0.851	0.835	0.805	0.918	1.012	1.123	1.177	1.147
Master Protein	Q4JG03	Mcl-1 ubiquitin ligase OS=Mus musculus GN=Huwe1 PE=2 SV=1	Huwe1	59026		High	FALSE	116	732	3	0	705.332	2915.79	35.4957	4.257	X	cell differentiation;cell organization and biogenesis;metabolic process;response to stimulus	cytoplasm;membrane;nucleus	catalytic activity;DNA binding;protein binding;RNA binding	Pf00632, Pf02825, Pf06012, Pf06025, Pf14377	1.011	0.985	0.968	0.959	0.985	0.98	0.98	0.975	1.001	0.984	0.984	0.993	0.998	0.965	1.003	0.985	0.969	0.954	1.005	0.964	0.962	0.976	0.961	0.968	0.946	0.957	1.017	1.002	0.991
Master Protein	P17710	Hexokinase-1 OS=Mus musculus GN=Hk1 PE=1 SV=3	Hk1	15275		High	FALSE	75	5756	65	0	701.563	21753.9	66.3244	561.341	10	cellular homeostasis;metabolic process;regulation of biological process;response to stimulus	cytosol;membrane;mitochondrion	catalytic activity;nucleotide binding;protein binding	Pf00349, Pf03727	0.98	0.979	0.975	0.956	0.976	0.976	0.918	0.914	0.97	0.97	0.965	0.958	0.983	0.983	0.979	0.973	0.921	0.913	0.951	0.947	0.967	0.959	0.945	0.94	0.956	0.962	0.978	0.979	0.985
Master Protein	Q920I9	WD repeat-containing protein 7 OS=Mus musculus GN=Wdr7 PE=1 SV=3	Wdr7	104082	ENSMUSG00000040560	High	FALSE	75	1243	75	0	700.057	5038.28	61.182	68.723	18	cell differentiation	cytoplasm	protein binding	Pf00400	0.976	0.988	1.02	1.016	0.987	0.988	0.965	0.96	0.963	0.972	0.988	0.975	0.957	0.96	0.971	0.982	0.974	0.978	0.944	0.944	0.996	0.983	0.967	0.955	0.961	0.963	0.987	0.986	1.025
Master Protein	P17426	AP-2 complex subunit alpha-1 OS=Mus musculus GN=Ap2a1 PE=1 SV=1	Ap2a1	11771	ENSMUSG00000060279	High	FALSE	69	3855	48	0	696.151	13933.2	72.1597	403.164	7	regulation of biological process;transport	membrane	protein binding;transporter activity	Pf01602, Pf02296, Pf02883, Pf13646	0.909	0.921	1.003	0.985	0.925	0.942	0.935	0.955	0.907	0.927	0.982	0.963	0.895	0.907	0.926	0.941	0.99	0.987	0.904	0.92	0.977	0.966	0.975	0.96	0.91	0.936	0.919	0.942	0.964
Master Protein	P70398	Probable ubiquitin carboxyl-terminal hydrolase FAF-X OS=Mus musculus GN=Usp9x PE=1 SV=2	Usp9x	22284		High	FALSE	93	1109	84	0	693.586	4210.71	40.9144	14.29	X	cell division;cell growth;cell organization and biogenesis;cellular component movement;metabolic process;regulation of biological process;response to stimulus	cytoplasm;membrane	catalytic activity;protein binding	Pf00443, Pf13423	0.928	0.937	0.94	0.928	0.96	0.933	0.972	0.971	0.983	0.957	0.983	0.972	0.917	0.933	0.95	0.956	0.968	0.968	0.984	0.959	0.957	0.951	0.955	0.956	0.965	0.943	1.001	0.97	0.994
Master Protein	B9EHN0	Ubiquitin-activating enzyme E1, Chr X OS=Mus musculus GN=Uba1 PE=2 SV=1	Uba1	22201	ENSMUSG00000001924	High	FALSE	59	2601	59	0	693.468	10974.9	67.5803	244.375	X	metabolic process;response to stimulus	cytoplasm;cytosol;membrane;mitochondrion;nucleus	catalytic activity;nucleotide binding;protein binding;RNA binding	Pf00899, Pf02134, Pf09358, Pf10585	0.958	0.977	0.945	0.93	0.962	0.97	0.956	0.953	0.972	0.975	0.981	0.973	0.94	0.965	0.961	0.973	0.922	0.921	0.982	0.979	0.959	0.958	0.972	0.969	0.956	0.961	0.997	1.001	0.981
Master Protein	Q8CAQ8-2	Isoform 2 of MICOS complex subunit Mic60 OS=Mus musculus GN=Immt	Immt	76614	ENSMUSG00000052337	High	FALSE	76	2711	6	0	692.892	10262.4	81.2332	661.87	6	cell organization and biogenesis;cellular homeostasis	membrane;mitochondrion	protein binding;RNA binding	Pf09731	1.003	1.006	0.951	0.925	0.992	0.99	0.921	0.935	1.028	1.02	0.965	0.947	0.975	0.981	0.997	0.998	0.906	0.912	0.999	0.992	0.943	0.931	0.9	0.886	0.981	0.986	1.029	1.018	1.038
Master Protein	Q6ZQ38	Cullin-associated NEDD8-dissociated protein 1 OS=Mus musculus GN=Cand1 PE=2 SV=2	Cand1	71902	ENSMUSG00000020114	High	FALSE	75	1861	72	0	691.736	7463.27	64.878	136.686	10	cell differentiation;cell organization and biogenesis;metabolic process;regulation of biological process	cytoplasm;Golgi;membrane;nucleus	protein binding	Pf08623, Pf12755, Pf13513	0.963	0.95	0.995	0.977	0.939	0.952	1.001	0.989	0.975	0.954	1.018	1.013	0.964	0.939	0.974	0.959	0.988	0.973	0.973	0.958	0.996	0.99	0.997	0.995	0.94	0.96	1.003	0.987	0.992
Master Protein	P11881-3	Isoform 3 of Inositol 1,4,5-trisphosphate receptor type 1 OS=Mus musculus GN=Itpr1	Itpr1		ENSMUSG00000030102	High	FALSE	115	948	101	0	691.31	3505.6	44.032	9.574	6	transport	membrane	transporter activity	Pf00520, Pf01365, Pf02815, Pf08454, Pf08709	0.995	0.994	0.985	0.969	1.002	1.019	0.915	0.909	0.984	0.983	0.972	0.957	0.978	0.976	1.009	1.003	0.98	0.98	1.034	1.042	0.971	0.966	0.965	0.95	0.949	0.947	0.993	0.999	0.979
Master Protein	E9Q3L2	Protein Pi4ka OS=Mus musculus GN=Pi4ka PE=1 SV=1	Pi4ka	224020	ENSMUSG00000041720	High	FALSE	94	999	94	0	690.919	3903.62	54.0607	18.255	16	metabolic process	cytoplasm;membrane	catalytic activity	Pf00454, Pf00613	0.996	1.034	0.994	0.984	1.002	0.957	0.964	0.978	0.986	0.994	0.976	0.973	0.987	1.03	1.001	1.034	0.978	0.977	0.95	0.949	0.974	0.963	0.957	0.944	0.977	0.957	0.986	0.992	1.017
Master Protein	Q7TMY8-3	Isoform 3 of E3 ubiquitin-protein ligase HUWE1 OS=Mus musculus GN=Huwe1	Huwe1			High	FALSE	114	718	1	0	690.231	2836.93	35.0757	4.187				catalytic activity	Pf00632, Pf02825, Pf06012, Pf06025, Pf14377
Master Protein	Q01853	Transitional endoplasmic reticulum ATPase OS=Mus musculus GN=Vcp PE=1 SV=4	Vcp	269523	ENSMUSG00000028452	High	FALSE	67	2476	66	0	688.585	9456.72	86.6005	1614.6	4	cell organization and biogenesis;metabolic process;regulation of biological process;response to stimulus;transport	cytoplasm;cytosol;endoplasmic reticulum;membrane;nucleus;proteasome	catalytic activity;enzyme regulator activity;nucleotide binding;protein binding;RNA binding	Pf00004, Pf00910, Pf01057, Pf01078, Pf02359, Pf02933, Pf05496, Pf05673, Pf06068, Pf07724, Pf07726, Pf07728, Pf09336, Pf13191, Pf13207, Pf13401	0.929	0.933	0.938	0.929	0.904	0.924	0.955	0.967	0.968	0.97	1.003	1.002	0.913	0.915	0.933	0.934	0.888	0.898	0.994	0.99	0.982	0.981	0.974	0.975	0.928	0.947	0.976	0.975	0.96
Master Protein	Q8C5U3	Putative uncharacterized protein (Fragment) OS=Mus musculus GN=Hsp90aa1 PE=2 SV=1	Hsp90aa1	15519		High	FALSE	57	6202	1	0	683.496	24278.2	71.2747	21062.4	12	cell organization and biogenesis;cellular component movement;metabolic process;regulation of biological process;response to stimulus;transport	cell surface;cytoplasm;cytosol;membrane;nucleus	catalytic activity;enzyme regulator activity;nucleotide binding;protein binding;RNA binding	Pf00183, Pf02518, Pf13589
Master Protein	F8VPK5	Rho-associated protein kinase OS=Mus musculus GN=Rock2 PE=3 SV=1	Rock2	19878	ENSMUSG00000020580	High	FALSE	107	1222	98	0	683.372	4403.33	63.9769	61.203	12	cell organization and biogenesis;metabolic process;regulation of biological process;response to stimulus	cytoplasm;cytoskeleton;membrane;nucleus	catalytic activity;metal ion binding;motor activity;nucleotide binding;protein binding;RNA binding;structural molecule activity	Pf00038, Pf00069, Pf00130, Pf01576, Pf01636, Pf02185, Pf02463, Pf04111, Pf04156, Pf05557, Pf05622, Pf05667, Pf06160, Pf07714, Pf07888, Pf08912, Pf09726, Pf09731, Pf11559, Pf12128, Pf12718, Pf12795, Pf14531	1	1.011	0.973	0.969	1.002	0.996	0.965	0.979	1.021	1.035	1.014	1.004	0.949	0.976	1.007	1.017	0.939	0.955	0.987	1	0.99	0.986	0.967	0.953	1.012	1.015	1.049	1.071	1.084
Master Protein	P68369	Tubulin alpha-1A chain OS=Mus musculus GN=Tuba1a PE=1 SV=1	Tuba1a	22142	ENSMUSG00000072235	High	FALSE	46	20166	2	0	681.474	90628.1	88.6918	681291	15	metabolic process	cytoplasm;cytoskeleton;endosome;nucleus	catalytic activity;nucleotide binding;protein binding;structural molecule activity	Pf00091, Pf03953	0.878	0.903	0.991	0.978	0.933	0.936	0.94	0.935	0.896	0.895	0.994	0.989	0.926	0.929	0.921	0.923	0.934	0.92	0.898	0.898	1.005	1.001	1.011	1.006	0.913	0.926	0.903	0.918	0.928
Master Protein	Q3U804	Putative uncharacterized protein OS=Mus musculus GN=Actb PE=2 SV=1	Actb	11461		High	FALSE	47	18685	2	0	679.379	83391	94.385	908517	5	cell organization and biogenesis;response to stimulus	cytoplasm;cytoskeleton;cytosol;membrane	DNA binding;nucleotide binding;protein binding	Pf00022	0.952	0.938	0.956	0.954	0.931	0.935	0.913	0.906	0.942	0.926	0.959	0.967	0.929	0.922	0.969	0.951	0.939	0.929	0.935	0.918	0.934	0.941	0.931	0.944	0.892	0.9	0.952	0.938	0.936
Master Protein	D5L240	Calcium-transporting ATPase OS=Mus musculus GN=Atp2b2 PE=2 SV=1	Atp2b2	11941		High	FALSE	75	2716	7	0	678.828	10380.7	54.8673	219.437	6	cell differentiation;cell organization and biogenesis;cellular homeostasis;metabolic process;regulation of biological process;response to stimulus;transport	cytoplasm;cytosol;endoplasmic reticulum;membrane	catalytic activity;metal ion binding;nucleotide binding;protein binding;transporter activity	Pf00122, Pf00689, Pf00690, Pf00702, Pf08282, Pf12424, Pf12710, Pf13246	0.969	0.991	1.029	1.005	0.957	0.967	0.839	0.834	0.885	0.891	1.06	1.034	1.048	1.09	0.85	0.847	0.996	1.004	1.079	1.096	1.033	1.022	1.048	1.01	0.992	1.01	1.026	1.038	1.048
Master Protein	K3W4R5	Cytoskeleton-associated protein 5 OS=Mus musculus GN=Ckap5 PE=4 SV=1	Ckap5	75786	ENSMUSG00000040549	High	FALSE	101	995	101	0	677.208	3796.79	52.4114	18.207	2	cell division;cell organization and biogenesis	cytoplasm;cytoskeleton;membrane	protein binding	Pf12348	0.976	0.983	0.926	0.915	0.975	0.983	0.956	0.963	1.024	1.011	0.984	0.99	0.979	0.97	1.008	1.015	0.93	0.936	1.013	1.008	0.95	0.959	0.957	0.965	1.011	1.019	1.009	1.011	1.006
Master Protein	Q7TMM9	Tubulin beta-2A chain OS=Mus musculus GN=Tubb2a PE=1 SV=1	Tubb2a	22151	ENSMUSG00000058672	High	FALSE	38	17242	2	0	676.238	61890.1	85.8427	1.10529e+06	13	metabolic process	cytoplasm;cytoskeleton;nucleus	catalytic activity;nucleotide binding;structural molecule activity	Pf00091, Pf03953, Pf10644	0.897	0.908	0.958	0.941	0.92	0.914	0.951	0.961	0.919	0.919	0.981	0.975	0.894	0.91	0.92	0.926	0.929	0.931	0.937	0.942	1.011	1.007	1.006	1	0.917	0.919	0.954	0.959	0.962
Master Protein	Q9WV92	Band 4.1-like protein 3 OS=Mus musculus GN=Epb41l3 PE=1 SV=1	Epb4.1l3; Epb41l3	13823	ENSMUSG00000024044	High	FALSE	70	1973	4	0	673.937	7897.97	69.6448	451.035	17	cell death;cell organization and biogenesis;regulation of biological process	cytoplasm;cytoskeleton;membrane	protein binding;structural molecule activity	Pf00373, Pf04382, Pf05902, Pf08736, Pf09379, Pf09380	1	0.994	0.964	0.95	0.936	0.956	0.994	1.002	1.02	1.005	0.969	0.955	0.928	0.926	0.936	0.931	0.877	0.875	1.114	1.088	0.991	0.996	0.991	0.981	1.042	1.069	1.121	1.097	1.058
Master Protein	F6XCT0	Microtubule-actin cross-linking factor 1 (Fragment) OS=Mus musculus GN=Macf1 PE=1 SV=1	Macf1	11426	ENSMUSG00000028649	High	FALSE	107	963	1	0	673.184	3524.17	62.2754	15.774	4	cell organization and biogenesis;cellular component movement;metabolic process;regulation of biological process;response to stimulus;transport	cytoplasm;cytoskeleton;Golgi;membrane	catalytic activity;metal ion binding;protein binding	Pf00307, Pf02463, Pf03938, Pf11971, Pf13514	0.856					0.923	1.035		0.952				0.945		0.808		0.879		0.94							1.074	0.956
Master Protein	Q5FW97	Enolase 1, alpha non-neuron OS=Mus musculus GN=EG433182 PE=2 SV=1	Eno1; Gm5506; Eno1b	13806; 433182	ENSMUSG00000059040; ENSMUSG00000063524	High	FALSE	56	11776	46	0	670.89	51127.7	94.47	117876	4; 18	metabolic process;regulation of biological process;response to stimulus	cytoplasm;membrane;nucleus	catalytic activity;metal ion binding;protein binding;RNA binding	Pf00113, Pf03952, Pf13378	0.958	0.962	0.936	0.928	0.96	0.956	0.915	0.932	0.986	0.982	0.961	0.958	0.948	0.964	0.959	0.958	0.866	0.875	0.965	0.962	0.957	0.96	0.954	0.96	0.977	0.98	0.99	0.989	0.99
Master Protein	Q61301-3	Isoform 3 of Catenin alpha-2 OS=Mus musculus GN=Ctnna2	Ctnna2	12386	ENSMUSG00000063063	High	FALSE	63	1444	48	0	666.125	6050.33	73.6383	248.202	6	cell differentiation;cell organization and biogenesis;cellular component movement;development;regulation of biological process	cytoplasm;cytoskeleton;membrane;nucleus	protein binding;structural molecule activity	Pf01044	1.004	1.004	0.993	0.98	1	1.01	0.952	0.959	1.024	1.034	0.977	0.975	1.004	1.007	1.013	1.014	0.961	0.957	1.008	1.013	0.976	0.975	0.954	0.954	0.986	1.004	1.027	1.038	1.026
Master Protein	P68372	Tubulin beta-4B chain OS=Mus musculus GN=Tubb4b PE=1 SV=1	Tubb4b	227613	ENSMUSG00000036752	High	FALSE	37	15153	2	0	660.928	55626.5	85.8427	904735	2	metabolic process	cytoplasm;cytoskeleton;nucleus	catalytic activity;nucleotide binding;RNA binding;structural molecule activity	Pf00091, Pf03953, Pf10644	0.954	0.971	0.903	0.893	0.959	0.954	0.909	0.929	0.998	1.009	0.945	0.937	0.963	0.984	0.983	0.997	0.85	0.857	1.01	1.021	0.962	0.96	0.95	0.946	1.012	1.011	1.025	1.039	0.991
Master Protein	S4R1C4	Calcium-transporting ATPase OS=Mus musculus GN=Atp2b2 PE=3 SV=1	Atp2b2		ENSMUSG00000030302	High	FALSE	75	2712	3	0	658.923	10241.4	56.7591	277.256	6	metabolic process;transport	membrane	catalytic activity;metal ion binding;nucleotide binding;transporter activity	Pf00122, Pf00689, Pf00690, Pf00702, Pf08282, Pf12424, Pf12710, Pf13246	1.073	0.931	1.056	1.001	1.074	1.025	0.784	0.809	0.941	0.794	1.022	0.994	1.165	1.004	0.931	0.789	0.968	1.042	1.142	0.982	0.907	0.94	0.966	0.899	1.108	1.082	1.083	0.91	1.137
Master Protein	Q3TYV5	Cyclic nucleotide phosphodiesterase 1, isoform CRA_b OS=Mus musculus GN=Cnp PE=2 SV=1	Cnp	12799	ENSMUSG00000006782	High	FALSE	63	6462	61	0	656.351	26928.3	92.381	28479.4	11	cell differentiation;cell organization and biogenesis;metabolic process;response to stimulus	cytoplasm;membrane;nucleus	catalytic activity;nucleotide binding;RNA binding	Pf05881, Pf06414, Pf13207, Pf13238, Pf13401, Pf13671	0.849	0.836	0.917	0.914	0.861	0.866	1.016	1.031	0.964	0.96	0.915	0.92	0.803	0.811	0.886	0.89	0.834	0.835	0.943	0.935	0.882	0.888	1.042	1.037	1.061	1.06	0.896	0.889	0.92
Master Protein	Q5SQX6	Cytoplasmic FMR1-interacting protein 2 OS=Mus musculus GN=Cyfip2 PE=1 SV=2	Cyfip2	76884	ENSMUSG00000020340	High	FALSE	71	1995	13	0	656.045	7481.21	60.0958	80.331	11	cell death;metabolic process;regulation of biological process	cytoplasm;membrane;nucleus	protein binding	Pf05994, Pf07159	1.016	1.012	0.984	0.969	0.998	1.002	0.891	0.921	0.963	0.957	0.972	0.954	0.954	0.945	1.026	1.026	1.002	1.02	0.985	0.974	0.985	0.969	0.972	0.958	0.946	0.953	0.991	0.978	1.008
Master Protein	Q9CWF2	Tubulin beta-2B chain OS=Mus musculus GN=Tubb2b PE=1 SV=1	Tubb2b	73710	ENSMUSG00000045136	High	FALSE	38	16896	2	0	655.732	60371.7	85.8427	740567	13	cellular component movement;metabolic process	cytoplasm;cytoskeleton;nucleus	catalytic activity;nucleotide binding;structural molecule activity	Pf00091, Pf03953, Pf10644	1.031	1.066	0.893	0.893	1.021	1.036	1.096	1.089	1.083	1.073	1.005	1.051	1.01	1.051	1.066	1.059	0.94	0.931	1.25	1.25	1.135	1.199	1.053	1.113	1.042	1.023	1.049	1.051	1.165
Master Protein	Q3U7X9	Putative uncharacterized protein OS=Mus musculus GN=Ap2a2 PE=2 SV=1	Ap2a2	11772		High	FALSE	65	2928	1	0	653.83	10678.3	67.8038	369.651	7	regulation of biological process;transport	membrane	protein binding;transporter activity	Pf01602, Pf02296, Pf02883, Pf13646	1.29	1.181	0.901	0.768	0.966		0.761	0.723	1.003	1.036	0.809	0.794	1.094	1.183	1.257	1.276	0.829	0.896	1.046	0.994	0.76	0.766	0.681	0.638	0.915		1.104	1.12	0.987
Master Protein	Q69ZW4	MKIAA0899 protein (Fragment) OS=Mus musculus GN=Ap2a2 PE=2 SV=1	Ap2a2	11772		High	FALSE	65	2945	1	0	653.063	10720.6	65.7704	369.651	7	regulation of biological process;transport	membrane	protein binding;transporter activity	Pf01602, Pf02296, Pf02883, Pf13646	0.927	0.959	1.055	1.01	0.949	0.93	0.913	0.932	0.891	0.91	1.001	0.958	0.917	0.958	0.918	0.948	0.986	0.994	0.886	0.906	0.994	0.968	0.964	0.928	0.917	0.906	0.939	0.96	0.993
Master Protein	Q9QVP9	Protein-tyrosine kinase 2-beta OS=Mus musculus GN=Ptk2b PE=1 SV=2	Ptk2b	19229	ENSMUSG00000059456	High	FALSE	70	1355	2	0	652.396	5525.43	76.115	144.133	14	cell differentiation;cell organization and biogenesis;cell proliferation;cellular component movement;cellular homeostasis;defense response;metabolic process;regulation of biological process;response to stimulus	cytoplasm;cytoskeleton;cytosol;membrane;nucleus	catalytic activity;nucleotide binding;protein binding;receptor activity;signal transducer activity;transporter activity	Pf00069, Pf00373, Pf03623, Pf07714	1.012	0.992	1.061	1.027	1.079	1.067	0.926	0.928	0.968	0.965	0.996	0.98	1.065	1.056	1.018	0.999	1.055	1.057	0.932	0.918	0.938	0.933	0.967	0.958	0.888	0.889	0.968	0.963	0.987
Master Protein	F6SHS0	Microtubule-actin cross-linking factor 1 (Fragment) OS=Mus musculus GN=Macf1 PE=1 SV=1	Macf1	11426	ENSMUSG00000028649	High	FALSE	104	927	0	0	651.842	3378.91	54.5813	12.005	4	cell organization and biogenesis;cellular component movement;metabolic process;regulation of biological process;response to stimulus;transport	cytoplasm;cytoskeleton;Golgi;membrane	catalytic activity;metal ion binding;protein binding	Pf00307, Pf00435, Pf02463, Pf03938, Pf07926, Pf11971, Pf12128, Pf13514
Master Protein	G3X9H5	Huntingtin OS=Mus musculus GN=Htt PE=1 SV=1	Htt	15194	ENSMUSG00000029104	High	FALSE	96	809	96	0	650.271	3214.51	39.1026	7.132	5	cell death;cell differentiation;cell organization and biogenesis;cellular component movement;metabolic process;regulation of biological process;response to stimulus;transport	cytoplasm;cytosol;endoplasmic reticulum;endosome;Golgi;membrane;nucleus;vacuole	protein binding	Pf12372	0.987	1.02	0.94	0.964	1.006	0.989	0.935	0.948	1.006	1.043	0.943	0.969	0.979	1.019	1	1.018	0.947	0.954	0.996	1.021	0.919	0.968	0.935	0.963	0.969	0.961	1.004	1.018	1.021
Master Protein	Q60597	2-oxoglutarate dehydrogenase, mitochondrial OS=Mus musculus GN=Ogdh PE=1 SV=3	Ogdh	18293	ENSMUSG00000020456	High	FALSE	60	1555	3	0	649.992	6330.76	56.9892	329.003	11	cellular component movement;metabolic process	cytosol;membrane;mitochondrion;organelle lumen	catalytic activity;metal ion binding;protein binding	Pf00676, Pf02779	0.985	0.964	0.958	0.88	1.094	1.038	0.843	0.824	0.984	0.983	0.851	0.76	1.032	1.078	0.992	1.005	0.783	0.785	0.921	0.904	0.93	0.869	0.952	0.873	1.115	1.064	0.953	0.941	1.038
Master Protein	B9EKP5	Filamin, alpha OS=Mus musculus GN=Flna PE=2 SV=1	Flna	192176		High	FALSE	105	699	1	0	649.658	2773.7	50.701	9.792	X	cell organization and biogenesis;metabolic process;regulation of biological process;response to stimulus;transport	cytoplasm;cytoskeleton;cytosol;membrane;nucleus	protein binding;RNA binding;signal transducer activity	Pf00307, Pf00630	1.126	1.067	0.892	0.93	0.853	0.834	0.968	0.906	0.911	0.864	0.845	0.988	1.2	1.159	1.065	1.058	1.061	1.024	0.817	0.779	1.003	1.097	0.614	0.611	0.799	0.737	1.077	1.017	1.013
Master Protein	Q8BTM8	Filamin-A OS=Mus musculus GN=Flna PE=1 SV=5	Flna	192176	ENSMUSG00000031328	High	FALSE	105	687	1	0	649.22	2725.32	50.5478	9.792	X	cell organization and biogenesis;metabolic process;regulation of biological process;response to stimulus;transport	cytoplasm;cytoskeleton;cytosol;membrane;nucleus	protein binding;RNA binding;signal transducer activity	Pf00307, Pf00630	0.944	0.945	0.856	0.842	0.767	0.821	0.874	0.871	1.043	1.046	0.832	0.828	0.942	0.956	0.91	0.916	0.937	0.911	0.931	0.941	0.926	0.921	0.784	0.803	0.844	0.879	1.083	1.091	0.86
Master Protein	Q6ZPE2-2	Isoform 2 of Myotubularin-related protein 5 OS=Mus musculus GN=Sbf1	Sbf1	77980	ENSMUSG00000036529	High	FALSE	79	1095	75	0	647.117	4405.73	52.879	22.331	15	regulation of biological process	nucleus	enzyme regulator activity	Pf00169, Pf02141, Pf03455, Pf03456, Pf06602, Pf08616, Pf12335, Pf14593, Pf15413	1.025	1.015	0.923	0.913	1.045	1.033	0.903	0.91	1.024	1.02	0.925	0.928	1.024	1.024	1.042	1.024	0.927	0.915	1.04	1.028	0.929	0.933	0.916	0.927	0.988	0.997	1.039	1.034	1.035
Master Protein	P03995	Glial fibrillary acidic protein OS=Mus musculus GN=Gfap PE=1 SV=4	Gfap	14580	ENSMUSG00000020932	High	FALSE	77	8000	11	0	646.75	32206.9	93.7209	49769.2	11	cell differentiation;cell organization and biogenesis;regulation of biological process;response to stimulus	cytoplasm;cytoskeleton;membrane	catalytic activity;motor activity;protein binding;structural molecule activity	Pf00038, Pf01576, Pf04732, Pf05761, Pf12128	0.618	0.632	0.535	0.54	0.666	0.675	0.725	0.734	0.738	0.745	0.816	0.813	0.641	0.658	0.636	0.646	0.55	0.551	0.729	0.733	0.837	0.838	0.752	0.756	0.67	0.685	0.658	0.665	0.652
Master Protein	E9Q800	Mitochondrial inner membrane protein OS=Mus musculus GN=Immt PE=1 SV=1	Immt	76614	ENSMUSG00000052337	High	FALSE	71	2509	2	0	641.962	9497.8	79.3814	796.923	6	cell organization and biogenesis;cellular homeostasis	membrane;mitochondrion	protein binding;RNA binding	Pf09731	1.177	1.135	0.94	0.965	1.172	1.081	0.915	0.94	1.16	1.102	0.909	0.908	1.133	1.129	1.14	1.095	0.927	0.974	1.089	1.102	0.865	0.86	0.897	0.905	1.06	1.1	1.063	1.097	1.224
Master Protein	A2ALL9	Calcium-transporting ATPase OS=Mus musculus GN=Atp2b3 PE=1 SV=1	Atp2b3	320707	ENSMUSG00000031376	High	FALSE	69	2728	2	0	640.859	10194.6	54.6462	242.835	X	cellular homeostasis;metabolic process;transport	Golgi;membrane	catalytic activity;metal ion binding;nucleotide binding;protein binding;transporter activity	Pf00122, Pf00689, Pf00690, Pf00702, Pf08282, Pf12424, Pf12710, Pf13246	1.007	1.001	1.012	1.066	1.008	0.957	0.974	0.987	1.007	1.001	0.986	1.022	0.984	0.989	1.008	0.998	1.041	1.018	0.981	0.958	0.977	1.015	0.954	0.996	0.924	0.905	0.999	0.992	0.999
Master Protein	Q0KL02-4	Isoform 4 of Triple functional domain protein OS=Mus musculus GN=Trio	Trio	223435	ENSMUSG00000022263	High	FALSE	97	860	78	0	639.443	3380.34	35.0306	6.157	15	metabolic process;regulation of biological process	cytoplasm;membrane	catalytic activity;nucleotide binding;protein binding	Pf00018, Pf00047, Pf00069, Pf00169, Pf00435, Pf00621, Pf00650, Pf02711, Pf06293, Pf07653, Pf07679, Pf07714, Pf13716, Pf13895, Pf13927, Pf14604	0.991	1.008	0.952	0.957	0.977	1.017	0.931	0.945	1.003	1.013	0.954	0.954	0.997	0.998	0.994	1.008	0.949	0.961	1.026	1.034	0.959	0.97	0.944	0.95	0.96	0.99	1.024	1.037	1.011
Master Protein	Q3UBP6	Putative uncharacterized protein OS=Mus musculus GN=Actb PE=2 SV=1	Actb	11461		High	FALSE	45	18901	1	0	636.671	80768.9	90.9333	818546	5	cell organization and biogenesis;response to stimulus	cytoplasm;cytoskeleton;cytosol;membrane	DNA binding;nucleotide binding;protein binding	Pf00022	0.994	0.993	0.939	0.931	1	1.002	0.869	0.872	0.998	0.989	0.928	0.932	0.995	0.999	1.016	1.013	0.918	0.902	0.984	0.975	0.916	0.921	0.921	0.926	0.952	0.96	1.009	0.998	0.99
Master Protein	Q8C2G0	Putative uncharacterized protein OS=Mus musculus GN=Ptk2b PE=2 SV=1	Ptk2b	19229		High	FALSE	67	1311	1	0	635.2	5386.43	74.6639	130.645	14	cell differentiation;cell organization and biogenesis;cellular component movement;cellular homeostasis;defense response;metabolic process;regulation of biological process;response to stimulus	cytoplasm;cytoskeleton;cytosol;membrane;nucleus	catalytic activity;nucleotide binding;protein binding;receptor activity;signal transducer activity;transporter activity	Pf00069, Pf00373, Pf03623, Pf07714		0.95				1.002	0.64			0.948				1.145		1.018	0.729			0.934						0.933		0.983
Master Protein	Q9WV92-8	Isoform 8 of Band 4.1-like protein 3 OS=Mus musculus GN=Epb41l3	Epb4.1l3; Epb41l3	13823		High	FALSE	68	1911	2	0	635.07	7595.15	58.4601	270.227	17	cell death;cell organization and biogenesis;regulation of biological process	cytoplasm;cytoskeleton;membrane	protein binding;structural molecule activity	Pf00373, Pf04382, Pf05902, Pf08736, Pf09379, Pf09380	0.997	0.951	0.909	0.9	0.95	0.942	0.929	1.077	1.044	0.994	0.942	0.923	0.955	0.906	1.025	0.958	0.895	0.89	1.009	0.981	0.896	0.896	0.883	0.887	1.068	1.01	1.033	0.998	1.019
Master Protein	Q545V3	Enolase 2, gamma neuronal, isoform CRA_a OS=Mus musculus GN=Eno2 PE=2 SV=1	Eno2	13807	ENSMUSG00000004267	High	FALSE	46	10115	36	0	634.547	43613.1	90.7834	31621.8	6	metabolic process	cytoplasm;membrane	catalytic activity;metal ion binding;protein binding	Pf00113, Pf03952, Pf13378	0.975	0.966	0.934	0.921	0.987	0.986	0.967	0.974	1.042	1.027	0.987	0.984	1.004	1.002	1.011	0.997	0.863	0.858	0.991	0.966	0.974	0.978	0.947	0.948	1.039	1.042	1.031	1.013	1.013
Master Protein	Q0VF55	Calcium-transporting ATPase OS=Mus musculus GN=Atp2b3 PE=2 SV=1	Atp2b3	320707	ENSMUSG00000031376	High	FALSE	68	2688	1	0	634.264	10065.7	51.8852	190.095	X	cellular homeostasis;metabolic process;transport	Golgi;membrane	catalytic activity;metal ion binding;nucleotide binding;protein binding;transporter activity	Pf00122, Pf00689, Pf00690, Pf00702, Pf08282, Pf12424, Pf12710, Pf13246	0.962	1.041	1.161	1.105	0.999	0.915	1.021	1.111	1.018	1.005	1.084	1.058	0.876	0.936	0.898	0.904	1.035	1.127	0.974	0.995	1.065	1.005	1.09	1.111	0.972	0.868	0.956	1.019	1.011
Master Protein	Q60597-4	Isoform 4 of 2-oxoglutarate dehydrogenase, mitochondrial OS=Mus musculus GN=Ogdh	Ogdh	18293	ENSMUSG00000020456	High	FALSE	60	1498	3	0	633.012	6011.89	56.4797	272.126	11	metabolic process	mitochondrion	catalytic activity;metal ion binding;protein binding	Pf00676, Pf02779	0.904	0.882	1.012	1.009	0.905	0.894	1.041	1.034	0.923	0.896	1.026	1.03	0.895	0.871	0.889	0.857	1.021	1.012	0.896	0.876	1.019	1.035	1.008	1.01	0.928	0.919	0.937	0.923	0.996
Master Protein	Q8BL66	Early endosome antigen 1 OS=Mus musculus GN=Eea1 PE=1 SV=2	Eea1	216238	ENSMUSG00000036499	High	FALSE	100	886	99	0	631.468	3386.49	64.9894	25.281	10	cell organization and biogenesis;transport	cytoplasm;cytosol;endosome;membrane	metal ion binding;protein binding	Pf01363, Pf07888, Pf09726	1.031	1.023	0.912	0.901	0.982	0.982	0.903	0.919	1.036	1.039	0.955	0.957	0.973	0.981	1.016	1.016	0.883	0.881	1.062	1.059	0.955	0.956	0.866	0.867	0.997	0.993	1.069	1.064	1.071
Master Protein	Q3V117	ATP-citrate synthase OS=Mus musculus GN=Acly PE=1 SV=1	Acly	104112	ENSMUSG00000020917	High	FALSE	66	1629	1	0	630.069	6263.14	64.5777	167.761	11	metabolic process	cytoplasm;membrane;mitochondrion	catalytic activity;metal ion binding;nucleotide binding;protein binding	Pf00285, Pf00549, Pf02629, Pf08442	0.901	0.911	0.875	0.857	0.885	0.88	1.006	0.988	0.965	0.975	1.012	1.008	0.866	0.88	0.902	0.907	0.856	0.822	0.943	0.955	0.992	0.996	0.994	0.998	0.983	0.993	0.939	0.948	0.951
Master Protein	Q03265	ATP synthase subunit alpha, mitochondrial OS=Mus musculus GN=Atp5a1 PE=1 SV=1	Atp5a1	11946	ENSMUSG00000025428	High	FALSE	62	10143	62	0	627.312	39931.4	77.7577	8295.96	18	metabolic process;regulation of biological process;transport	membrane;mitochondrion	catalytic activity;nucleotide binding;protein binding;RNA binding;transporter activity	Pf00006, Pf00306, Pf02663, Pf02874, Pf05943	1.032	1.035	0.951	0.946	1.024	1.023	0.905	0.918	1.029	1.028	0.966	0.972	1.035	1.043	1.015	1.017	0.896	0.902	0.977	0.971	0.931	0.943	0.894	0.906	1.029	1.034	1.031	1.03	1.027
Master Protein	Q4KMM3	Oxidation resistance protein 1 OS=Mus musculus GN=Oxr1 PE=2 SV=3	Oxr1	170719	ENSMUSG00000022307	High	FALSE	65	1627	4	0	626.476	6476.12	71.4781	380.784	15	metabolic process;regulation of biological process;response to stimulus	mitochondrion;nucleus	catalytic activity	Pf01476, Pf07534	1.055	1.06	0.935	0.92	0.999	1	0.9	0.899	1.064	1.054	0.954	0.944	0.992	0.996	1.022	1.022	0.896	0.889	1.005	1.008	0.978	0.979	0.929	0.92	1.009	1.009	1.087	1.085	1.097
Master Protein	P68373	Tubulin alpha-1C chain OS=Mus musculus GN=Tuba1c PE=1 SV=1	Tuba1c	22146	ENSMUSG00000043091	High	FALSE	42	18049	1	0	624.876	77851.4	82.8508	287297	15	metabolic process	cytoplasm;cytoskeleton;nucleus	catalytic activity;nucleotide binding;structural molecule activity	Pf00091, Pf03953	0.996	0.956	0.766	0.766	1.045	1.042	0.911	0.901	1.078	1.08	0.802	0.819	1.073	1.035	0.965	0.96	0.927	0.889	1.062	1.051	0.89	0.861	0.871	0.817	1.053	1.053	1.101	1.126	1.044
Master Protein	Q9D6F9	Tubulin beta-4A chain OS=Mus musculus GN=Tubb4a PE=1 SV=3	Tubb4a	22153	ENSMUSG00000062591	High	FALSE	36	12284	10	0	620.274	44631.7	86.036	272133	17	cell organization and biogenesis;metabolic process	cytoplasm;cytoskeleton;nucleus	catalytic activity;nucleotide binding;structural molecule activity	Pf00091, Pf03953, Pf10644	0.928	0.924	0.904	0.892	0.999	0.979	0.881	0.896	0.953	0.93	0.893	0.892	0.991	0.993	0.953	0.953	0.859	0.873	0.953	0.931	0.931	0.935	0.941	0.937	0.992	0.98	0.97	0.958	0.966
Master Protein	Q91V92	ATP-citrate synthase OS=Mus musculus GN=Acly PE=1 SV=1	Acly	104112	ENSMUSG00000020917	High	FALSE	66	1610	1	0	618.311	6178.46	64.7113	150.991	11	metabolic process	cytoplasm;membrane;mitochondrion	catalytic activity;metal ion binding;nucleotide binding;protein binding	Pf00285, Pf00549, Pf02629, Pf08442			0.826	0.797				0.751			1.066	1.021						0.666			0.943	0.911	1.035	0.961
Master Protein	P68368	Tubulin alpha-4A chain OS=Mus musculus GN=Tuba4a PE=1 SV=1	Tuba4a	22145	ENSMUSG00000026202	High	FALSE	42	17561	16	0	612.896	79057.9	84.5982	237136	1	metabolic process	cytoplasm;cytoskeleton	catalytic activity;nucleotide binding;protein binding;structural molecule activity	Pf00091, Pf03953	0.727	0.652	1.178	1.174	0.712	0.752	1.042	1.056	0.723	0.671	1.114	1.117	0.725	0.673	0.732	0.703	1.08	1.089	0.722	0.69	1.103	1.103	1.111	1.116	0.701	0.743	0.801	0.743	0.84
Master Protein	Q7TMB8	Cytoplasmic FMR1-interacting protein 1 OS=Mus musculus GN=Cyfip1 PE=1 SV=1	Cyfip1	20430	ENSMUSG00000030447	High	FALSE	67	1399	1	0	612.85	5236.97	60.8939	66.445	7	cell differentiation;cell growth;cell organization and biogenesis;development;regulation of biological process;response to stimulus	cytoplasm	protein binding	Pf05994, Pf07159	1.037	1.01	0.972	0.945	0.989	0.973	0.925	0.912	1.011	0.992	1.033	0.999	0.875	0.858	0.985	0.986	0.983	0.958	1.027	1.02	1.037	0.997	1.011	0.964	0.918	0.909	0.998	0.967	0.993
Master Protein	P16858	Glyceraldehyde-3-phosphate dehydrogenase OS=Mus musculus GN=Gapdh PE=1 SV=2	Gapdh; Gm20899; LOC100042025; Gapdh-ps15; Gm12033	14433; 100042025; 100042746	ENSMUSG00000057666	High	FALSE	35	14144	3	0	608.187	54421	92.1922	389859	6; Y; 11	cell death;cell organization and biogenesis;development;metabolic process;regulation of biological process;response to stimulus	cytoplasm;cytoskeleton;cytosol;membrane;mitochondrion;nucleus	catalytic activity;nucleotide binding;protein binding	Pf00044, Pf02800	0.976	0.973	0.936	0.928	0.996	0.991	0.957	0.968	1.03	1.026	0.984	0.983	0.98	0.976	0.98	0.977	0.879	0.884	1.023	1.018	0.959	0.966	0.98	0.984	1.014	1.02	1.03	1.027	1.017
Master Protein	E9PVA8	Protein Gcn1l1 OS=Mus musculus GN=Gcn1l1 PE=4 SV=1	Gcn1l1	231659	ENSMUSG00000041638	High	FALSE	103	604	102	0	606.803	2346.5	47.6601	5.277	5	cell communication;regulation of biological process;response to stimulus	cytoplasm;membrane	enzyme regulator activity;protein binding;RNA binding	Pf12074, Pf13646	0.998	1.016	0.966	0.962	0.926	0.946	0.92	0.917	1.003	1.035	0.996	0.993	1.025	1.025	0.986	0.994	0.889	0.88	1.035	1.056	0.943	0.945	1.009	0.994	0.948	0.966	0.981	0.997	0.934
Master Protein	Q64727	Vinculin OS=Mus musculus GN=Vcl PE=1 SV=4	Vcl	22330	ENSMUSG00000021823	High	FALSE	78	1233	78	0	606.415	4744.35	75.7036	45.416	14	cell growth;cell organization and biogenesis;regulation of biological process	cytoplasm;cytoskeleton;membrane	protein binding;structural molecule activity	Pf01044	0.9	0.926	0.882	0.866	0.852	0.847	0.922	0.911	0.976	0.992	0.924	0.929	0.919	0.934	0.918	0.936	0.855	0.848	0.937	0.946	0.993	0.98	0.911	0.905	0.935	0.929	0.983	0.993	0.923
Master Protein	P57780	Alpha-actinin-4 OS=Mus musculus GN=Actn4 PE=1 SV=1	Actn4	60595	ENSMUSG00000054808	High	FALSE	69	1699	27	0	604.54	6667.62	77.3026	172.02	7	cell organization and biogenesis;cellular component movement;regulation of biological process;response to stimulus;transport	cytoplasm;cytoskeleton;nucleus	DNA binding;metal ion binding;protein binding;RNA binding	Pf00307, Pf00435, Pf08726, Pf11971, Pf13499	0.973	0.989	0.932	0.929	0.982	0.962	0.904	0.912	1.004	1.01	0.944	0.936	0.947	0.958	0.99	0.986	0.934	0.943	1.012	1.013	0.967	0.965	0.916	0.907	0.987	0.981	1.041	1.042	1.046
Master Protein	B9EIU1	Glutamyl-prolyl-tRNA synthetase OS=Mus musculus GN=Eprs PE=2 SV=1	Eprs	107508		High	FALSE	83	787	82	0	604.083	3164.05	59.5899	29.494	1	metabolic process;regulation of biological process;response to stimulus	cytoplasm;membrane	catalytic activity;nucleotide binding;protein binding;RNA binding	Pf00458, Pf00587, Pf00749, Pf01406, Pf03129, Pf03950, Pf09180, Pf14497	0.969	0.976	0.918	0.969	0.966	0.966	0.995	0.998	1.009	1.006	0.954	1.031	0.943	0.958	0.998	0.992	0.983	0.974	1.003	1.013	0.949	1.009	0.966	1.035	1.01	1.011	0.989	0.999	1.011
Master Protein	P99024	Tubulin beta-5 chain OS=Mus musculus GN=Tubb5 PE=1 SV=1	Tubb5	22154	ENSMUSG00000001525	High	FALSE	37	13351	7	0	602.061	48584.3	86.036	246208	17	cell organization and biogenesis;metabolic process	cytoplasm;cytoskeleton;cytosol;nucleus	catalytic activity;nucleotide binding;protein binding;structural molecule activity	Pf00091, Pf03953, Pf10644	0.966	0.966	0.902	0.901	0.993	0.981	0.832	0.845	0.964	0.967	0.882	0.882	1.007	0.984	1.011	1.006	0.843	0.861	0.981	0.994	0.927	0.922	0.91	0.91	0.98	0.971	0.983	0.995	0.949
Master Protein	Q4KMM3-4	Isoform 4 of Oxidation resistance protein 1 OS=Mus musculus GN=Oxr1	Oxr1	170719		High	FALSE	62	1536	1	0	596.299	6114.85	71.3945	367.161	15	regulation of biological process;response to stimulus	mitochondrion;nucleus	catalytic activity	Pf01476, Pf07534			0.942	1.024							0.963	1.064									0.926	0.987	0.939	0.986
Master Protein	Q6P1J1	Crmp1 protein OS=Mus musculus GN=Crmp1 PE=1 SV=1	Crmp1	12933	ENSMUSG00000029121	High	FALSE	42	4873	4	0	596.01	21142.4	75.8017	1121.02	5	cell organization and biogenesis;cellular component movement;metabolic process	cytoplasm;cytoskeleton	catalytic activity;protein binding	Pf01979, Pf07969, Pf13147, Pf13594	0.988	0.98	0.951	0.94	1.012	1.022	0.887	0.889	1.013	0.995	0.954	0.953	1.019	1.022	0.996	0.985	0.902	0.902	1.056	1.042	0.966	0.971	0.972	0.969	0.989	1.008	1.034	1.025	1.006
Master Protein	Q91ZX7	Prolow-density lipoprotein receptor-related protein 1 OS=Mus musculus GN=Lrp1 PE=1 SV=1	Lrp1	16971		High	FALSE	96	967	94	0	594.385	3438.07	25.1485	2.931	10	cell proliferation;development;metabolic process;regulation of biological process;response to stimulus;transport	cytoplasm;endosome;membrane;nucleus	metal ion binding;protein binding;RNA binding	Pf00057, Pf00058, Pf07645, Pf12662, Pf14670	0.966	0.96	0.922	0.906	0.98	0.969	0.927	0.905	1.015	0.994	0.986	0.96	0.934	0.924	0.961	0.951	0.922	0.884	1.019	1.003	0.974	0.965	0.945	0.919	0.98	0.965	1.006	0.986	0.988
Master Protein	Q6P4T2	U5 small nuclear ribonucleoprotein 200 kDa helicase OS=Mus musculus GN=Snrnp200 PE=1 SV=1	Snrnp200	320632	ENSMUSG00000003660	High	FALSE	80	730	80	0	593.231	2982.84	48.7828	9.554	2	cell differentiation;metabolic process	membrane;nucleus;spliceosomal complex	catalytic activity;DNA binding;nucleotide binding;protein binding;RNA binding	Pf00270, Pf00271, Pf02889, Pf04851	0.986	0.977	0.943	0.943	0.946	0.959	0.92	0.91	1.01	1.001	0.99	0.986	0.996	0.972	0.985	0.976	0.914	0.904	1.009	0.993	0.958	0.968	0.971	0.976	0.94	0.942	1.009	0.999	0.98
Master Protein	Q8CHF1	MKIAA0531 protein (Fragment) OS=Mus musculus GN=mKIAA0531 PE=2 SV=1	Kif5c	16574		High	FALSE	77	1314	55	0	592.151	4920.11	69.5035	152.993	2	cellular component movement;metabolic process;transport	cytoplasm	catalytic activity;motor activity;nucleotide binding;protein binding	Pf00225, Pf09731, Pf14362	0.961	0.958	0.92	0.907	0.98	0.968	0.961	0.973	1.038	1.029	0.993	0.973	0.99	0.98	0.976	0.973	0.879	0.888	1.018	1.02	0.992	0.979	0.979	0.973	0.996	0.998	1.026	1.023	1.03
Master Protein	Q61699	Heat shock protein 105 kDa OS=Mus musculus GN=Hsph1 PE=1 SV=2	Hsph1	15505	ENSMUSG00000029657	High	FALSE	52	1633	49	0	592.142	6454.62	65.1515	256.463	5	metabolic process;regulation of biological process;response to stimulus;transport	cytoplasm;cytosol;extracellular;nucleus	nucleotide binding;protein binding	Pf00012	0.949	0.919	0.971	0.942	0.948	0.968	1.052	1.064	0.984	0.947	1.09	1.057	0.97	0.93	0.948	0.92	0.927	0.904	0.987	0.946	1.09	1.054	1.024	1.004	0.986	1.016	1.046	1.008	1.043
Master Protein	P38647	Stress-70 protein, mitochondrial OS=Mus musculus GN=Hspa9 PE=1 SV=3	Hspa9	15526	ENSMUSG00000024359	High	FALSE	57	2248	56	0	592.085	8539.81	72.3122	1231.85	18	cell organization and biogenesis;metabolic process;response to stimulus;transport	cytoplasm;mitochondrion;nucleus	nucleotide binding;protein binding;RNA binding	Pf00012, Pf06723	0.968	0.958	0.939	0.915	0.976	0.985	0.945	0.935	0.985	0.975	1.004	0.987	0.941	0.942	0.956	0.941	0.9	0.891	0.996	0.979	0.975	0.955	0.929	0.92	1.03	1.035	1.005	0.99	1.035
Master Protein	Q3UHJ0	AP2-associated protein kinase 1 OS=Mus musculus GN=Aak1 PE=1 SV=2	Aak1	269774	ENSMUSG00000057230	High	FALSE	50	1258	47	0	586.305	5477.98	77.1637	254.955	6	metabolic process;regulation of biological process;transport	cytoplasm;membrane	catalytic activity;nucleotide binding;protein binding	Pf00069, Pf07714	1.05	1.044	1.021	1.017	0.986	1.01	0.962	0.95	1.006	0.978	0.936	0.944	1.04	1.024	0.984	0.975	0.922	0.9	1.03	1.01	0.995	1.019	0.991	1.001	1.003	1.039	1.071	1.055	1.091
Master Protein	Q7TMB8-2	Isoform 2 of Cytoplasmic FMR1-interacting protein 1 OS=Mus musculus GN=Cyfip1	Cyfip1			High	FALSE	65	1244	1	0	583.673	4712.96	59.6323	52.367					Pf05994, Pf07159			0.97	1.101							1.043	1.036									0.941	1.026	0.989	0.71
Master Protein	Q9JLN9	Serine/threonine-protein kinase mTOR OS=Mus musculus GN=Mtor PE=1 SV=2	Mtor	56717	ENSMUSG00000028991	High	FALSE	93	652	91	0	583.146	2613.11	46.3319	6.554	4	cell communication;cell growth;cell organization and biogenesis;metabolic process;regulation of biological process;response to stimulus	cytoplasm;cytosol;endoplasmic reticulum;Golgi;membrane;mitochondrion;nucleus;vacuole	catalytic activity;DNA binding;nucleotide binding;protein binding	Pf00454, Pf02259, Pf02260, Pf08771, Pf11865	1.022	0.963	0.876	0.897	1.012	0.979	0.858	0.922	1.022	0.966	0.896	0.925	1.025	0.953	1.018	0.947	0.857	0.903	1.014	0.959	0.876	0.921	0.882	0.929	1.016	0.99	1.035	0.973	1.024
Master Protein	A2AGR0	MAP kinase-activating death domain protein OS=Mus musculus GN=Madd PE=1 SV=1	Madd	228355	ENSMUSG00000040687	High	FALSE	65	900	7	0	580.42	3783.94	46.9245	30.197	2	cell death;regulation of biological process	cytoplasm;cytosol;membrane;nucleus		Pf02141, Pf03455, Pf03456	1.008	1.024	0.961	0.972	1.026	1.033	0.951	0.96	1.028	1.05	0.971	0.992	1.032	1.058	1.022	1.033	0.942	0.931	0.986	1.006	0.955	0.982	0.945	0.974	0.975	0.987	0.999	1.017	1
Master Protein	E9Q0N0	Intersectin-1 OS=Mus musculus GN=Itsn1 PE=1 SV=1	Itsn1	16443	ENSMUSG00000022957	High	FALSE	81	926	75	0	576.785	3490.15	50.6108	26.977	16	cell differentiation;cellular component movement;metabolic process;regulation of biological process;response to stimulus;transport	membrane	catalytic activity;enzyme regulator activity;metal ion binding;nucleotide binding;protein binding;structural molecule activity	Pf00018, Pf00168, Pf00169, Pf00621, Pf02050, Pf02463, Pf02841, Pf03357, Pf03938, Pf04111, Pf04156, Pf04502, Pf04709, Pf05262, Pf05557, Pf06818, Pf07111, Pf07653, Pf07888, Pf09726, Pf09731, Pf09756, Pf10037, Pf10174, Pf10186, Pf11559, Pf11600, Pf12072, Pf12128, Pf12763, Pf13868, Pf14604, Pf14915, Pf15346, Pf15558, Pf15619	1.02	1.025	0.955	0.944	1	1.012	0.92	0.944	1.024	1.008	0.977	0.961	0.99	1.011	1.015	1.018	0.946	0.954	1.028	1.034	0.956	0.949	0.921	0.917	0.985	0.995	1.054	1.052	1.024
Master Protein	S4R1V6	Ankyrin-2 OS=Mus musculus GN=Ank2 PE=1 SV=1	Ank2		ENSMUSG00000032826	High	FALSE	55	1798	0	0	575.592	7161	65.5405	131.035	3	regulation of biological process;response to stimulus		protein binding	Pf00531, Pf00791
Master Protein	Q6PB66	Leucine-rich PPR motif-containing protein, mitochondrial OS=Mus musculus GN=Lrpprc PE=1 SV=2	Lrpprc	72416	ENSMUSG00000024120	High	FALSE	77	929	77	0	575.2	3538.66	61.9253	24.354	17	metabolic process;regulation of biological process;transport	chromosome;cytoplasm;cytoskeleton;membrane;mitochondrion;nucleus	DNA binding;protein binding;RNA binding	Pf12854, Pf13041, Pf13812	0.924	0.964	0.931	0.92	1.013	0.984	0.924	0.94	0.958	0.987	0.978	0.971	0.948	0.967	0.979	1.014	0.938	0.948	0.97	1	0.924	0.925	0.895	0.88	1.066	1.049	0.948	0.987	1.027
Master Protein	P03995-2	Isoform 2 of Glial fibrillary acidic protein OS=Mus musculus GN=Gfap	Gfap	14580	ENSMUSG00000020932	High	FALSE	67	7421	1	0	574.716	30568.7	90.1869	9999	11	cell differentiation;cell organization and biogenesis;regulation of biological process;response to stimulus	cytoplasm;cytoskeleton;membrane	catalytic activity;motor activity;protein binding;structural molecule activity	Pf00038, Pf01576, Pf04732, Pf05761, Pf12128								0.781										0.747
Master Protein	P46660	Alpha-internexin OS=Mus musculus GN=Ina PE=1 SV=3	Ina	226180	ENSMUSG00000034336	High	FALSE	67	3729	61	0	573.552	15118.7	86.6267	2388.89	19	cell differentiation;cell organization and biogenesis;development;regulation of biological process	cytoskeleton;membrane	protein binding;structural molecule activity	Pf00038, Pf04732, Pf10186	0.948	0.901	0.896	0.881	0.989	0.991	1.034	1.042	1.009	0.986	0.906	0.887	0.91	0.896	0.953	0.938	0.829	0.835	1.064	1.023	0.898	0.9	0.871	0.846	1.027	1.049	0.95	0.914	1.006
Master Protein	E9PUD2	Dynamin-1-like protein OS=Mus musculus GN=Dnm1l PE=1 SV=1	Dnm1l	74006	ENSMUSG00000022789	High	FALSE	64	1924	5	0	572.252	7375.93	84.8315	322.448	16	cell death;cell organization and biogenesis;metabolic process;regulation of biological process;transport	cytoplasm;cytoskeleton;cytosol;Golgi;membrane;mitochondrion	catalytic activity;nucleotide binding;protein binding	Pf00350, Pf01031, Pf02212	0.942	0.946	0.987	0.968	0.986	0.968	0.981	0.975	0.982	0.976	1.016	0.996	0.951	0.953	0.947	0.945	0.912	0.905	0.945	0.941	0.986	0.98	0.974	0.965	0.979	0.964	0.984	0.986	1.018
Master Protein	Q64521	Glycerol-3-phosphate dehydrogenase, mitochondrial OS=Mus musculus GN=Gpd2 PE=1 SV=2	Gpd2	14571	ENSMUSG00000026827	High	FALSE	63	2197	63	0	571.364	8241.65	81.293	456.088	2	metabolic process	membrane;mitochondrion	catalytic activity;metal ion binding	Pf00890, Pf01266, Pf03486, Pf07992, Pf12831, Pf13499	0.984	0.973	0.983	0.974	1.016	1.016	0.868	0.883	0.946	0.945	0.941	0.939	1.06	1.053	1.042	1.028	0.954	0.949	0.924	0.927	0.964	0.962	0.913	0.908	0.986	0.986	0.989	0.986	1.017
Master Protein	Q8K1M6	Dynamin-1-like protein OS=Mus musculus GN=Dnm1l PE=1 SV=2	Dnm1l	74006		High	FALSE	61	1952	4	0	571.339	7661.82	82.2102	227.292	16	cell death;cell organization and biogenesis;metabolic process;regulation of biological process;transport	cytoplasm;cytoskeleton;cytosol;Golgi;membrane;mitochondrion	catalytic activity;nucleotide binding;protein binding	Pf00350, Pf01031, Pf02212	1.022	0.935	0.988	0.999	0.969	0.962	0.972	0.945	1.019	0.975	0.99	1.021	1.022	0.952	0.993	0.908	0.884	0.83	1.03	0.961	0.99	1.004	1.004	1.013	0.974	1.006	1.053	0.994	1.033
Master Protein	Q64332	Synapsin-2 OS=Mus musculus GN=Syn2 PE=1 SV=2	Syn2	20965	ENSMUSG00000009394	High	FALSE	36	5322	4	0	570.614	24208.5	67.0648	9209.55	6	metabolic process;transport	membrane	catalytic activity;nucleotide binding;protein binding	Pf02078, Pf02750, Pf10581	1.028	1.031	1.065	1.035	1.005	1.017	0.923	0.925	0.965	0.96	1.002	0.982	1.033	1.047	0.99	0.987	0.964	0.947	0.932	0.925	1.011	0.998	0.983	0.965	0.961	0.977	1.042	1.042	1.05
Master Protein	P23819-4	Isoform 4 of Glutamate receptor 2 OS=Mus musculus GN=Gria2	Gria2			High	FALSE	64	1961	0	0	568.921	7646.07	60.8035	223.829			membrane	receptor activity;signal transducer activity;transporter activity	Pf00060, Pf00497, Pf01094, Pf10613, Pf13458	1.05	1.056	1.029	1.031	1.091	1.07	0.899	0.874	0.943	0.939	0.936	0.939	1.03	1.044	1.059	1.059	1.029	1.003	0.95	0.957	0.947	0.949	0.941	0.949	0.947	0.921	0.971	0.986	1.021
Master Protein	P97427	Dihydropyrimidinase-related protein 1 OS=Mus musculus GN=Crmp1 PE=1 SV=1	Crmp1	12933	ENSMUSG00000029121	High	FALSE	40	4756	2	0	568.036	20622.3	80.2448	2201.2	5	cell organization and biogenesis;cellular component movement;metabolic process;regulation of biological process;response to stimulus	cytoplasm;cytoskeleton	catalytic activity;protein binding	Pf01979, Pf07969, Pf13147, Pf13594	0.981	0.912	0.8	0.814	0.926	0.873	0.787	0.853	0.913	1.029	0.87	0.837	0.871	0.811	1.039	0.958	0.806	0.862	0.928	1.03	0.826	0.841	0.819	0.839	0.938	0.875	0.909	0.973	0.928
Master Protein	P48722	Heat shock 70 kDa protein 4L OS=Mus musculus GN=Hspa4l PE=1 SV=2	Hspa4l	18415	ENSMUSG00000025757	High	FALSE	65	1697	62	0	567.933	6457.26	76.3723	191.014	3	metabolic process;response to stimulus	cytoplasm;cytosol;nucleus	nucleotide binding;protein binding	Pf00012	0.943	0.94	0.966	0.947	0.916	0.93	1.019	1.03	1.009	0.999	1.038	1.02	0.927	0.928	0.948	0.933	0.931	0.926	0.958	0.956	1.009	0.998	1.011	0.992	0.952	0.975	1.015	1	0.997
Master Protein	A2AUK5	Band 4.1-like protein 1 OS=Mus musculus GN=Epb4.1l1 PE=1 SV=1	Epb4.1l1; Epb41l1	13821	ENSMUSG00000027624	High	FALSE	61	1796	7	0	567.908	6513.51	61.7747	308.433	2	cell organization and biogenesis	cytoplasm;cytoskeleton	protein binding;structural molecule activity	Pf00373, Pf04382, Pf05902, Pf08736, Pf09379, Pf09380	1.029	1.027	0.965	0.952	1.004	1.003	0.924	0.948	0.994	0.992	0.957	0.954	0.996	1.008	0.997	0.992	0.935	0.955	1.07	1.064	0.988	0.977	0.935	0.924	1.011	1.019	1.074	1.067	1.046
Master Protein	S4R1W1	Glyceraldehyde-3-phosphate dehydrogenase OS=Mus musculus GN=Gm3839 PE=3 SV=1	Gm3839		ENSMUSG00000097148	High	FALSE	32	13967	1	0	567.701	53727.6	90.3904	136886	14	metabolic process		catalytic activity;nucleotide binding	Pf00044, Pf02800			1.026	1.042			1.093	1.153			1.05	1.079					1.028	1.164			1.04	1.069	1.028	1.037
Master Protein	Q9QZ83	Gamma actin-like protein OS=Mus musculus GN=Actg1 PE=2 SV=1	Actg1	11465		High	FALSE	40	16433	1	0	567.273	75938.8	81.1705	135030	11	cell organization and biogenesis	cytoplasm;cytoskeleton;membrane;nucleus	nucleotide binding;protein binding;structural molecule activity	Pf00022	1.202	1.132		0.823					1.311	0.943		0.76	1.122	0.901	1.299	1.113			1.068	1.031		0.707		0.614			1.077	0.942
Master Protein	P06745	Glucose-6-phosphate isomerase OS=Mus musculus GN=Gpi PE=1 SV=4	Gpi1	14751	ENSMUSG00000036427	High	FALSE	46	3113	22	0	565.02	11391.8	74.1935	7126.56	7	metabolic process;regulation of biological process;response to stimulus	cytoplasm;cytosol;extracellular;membrane	catalytic activity;protein binding	Pf00342	0.99	0.987	0.907	0.906	0.995	0.996	0.927	0.95	1.031	1.033	0.95	0.948	0.986	0.984	0.998	0.997	0.868	0.876	1.022	1.024	0.934	0.934	0.941	0.933	0.992	0.996	1.021	1.022	1.018
Master Protein	P13595	Neural cell adhesion molecule 1 OS=Mus musculus GN=Ncam1 PE=1 SV=3	Ncam1	17967		High	FALSE	62	3583	10	0	563.619	13952.7	54.2601	158.731	9	cell organization and biogenesis;cellular component movement;regulation of biological process;response to stimulus	cell surface;cytoplasm;membrane	protein binding	Pf00041, Pf00047, Pf07654, Pf07679, Pf08205, Pf13895, Pf13927	0.977	0.978	0.991	0.983	0.957	0.956	0.927	0.949	1.022	1.02	0.998	0.98	0.953	0.966	0.987	0.985	0.931	0.953	1.021	1.012	0.983	0.974	0.973	0.962	0.989	0.996	1.033	1.029	0.989
Master Protein	P47857	ATP-dependent 6-phosphofructokinase, muscle type OS=Mus musculus GN=Pfkm PE=1 SV=3	Pfkm	18642	ENSMUSG00000033065	High	FALSE	45	2177	40	0	562.801	8981.16	67.4359	418.008	15	cell organization and biogenesis;cellular homeostasis;metabolic process;regulation of biological process	cytoplasm;cytosol;membrane	catalytic activity;metal ion binding;nucleotide binding;protein binding	Pf00365	0.952	0.939	0.934	0.912	0.971	0.958	0.945	0.965	0.989	0.962	0.978	0.97	0.93	0.915	0.959	0.941	0.911	0.913	0.993	0.974	0.965	0.949	0.948	0.935	0.989	0.982	1.02	0.998	1.023
Master Protein	Q8BYI9	Tenascin-R OS=Mus musculus GN=Tnr PE=1 SV=2	Tnr	21960	ENSMUSG00000015829	High	FALSE	53	3121	53	0	560.015	13518.4	46.9809	48.619	1	cell organization and biogenesis;cellular component movement;regulation of biological process;response to stimulus	cell surface;cytoplasm;extracellular;membrane;nucleus	protein binding	Pf00041, Pf00147, Pf01683, Pf07974	1.041	1.044	0.937	0.93	1.033	1.033	0.869	0.883	1.014	1.009	0.932	0.928	1.062	1.073	1.052	1.051	0.889	0.894	1.019	1.015	0.909	0.913	0.899	0.899	1.012	1.023	1.07	1.062	1.022
Master Protein	Q80UE5	Erythrocyte protein band 4.1-like 2, isoform CRA_c OS=Mus musculus GN=Epb4.1l2 PE=2 SV=1	Epb4.1l2; Epb41l2	13822		High	FALSE	71	1359	1	0	558.825	5029.91	57.1895	144.859	10	cell organization and biogenesis;regulation of biological process	cytoplasm;cytoskeleton;membrane;nucleus	protein binding;structural molecule activity	Pf00373, Pf05902, Pf08736, Pf09379, Pf09380			0.91	0.933			0.907	0.837			0.955	0.944					0.785	0.789			0.972	0.96	0.989	0.952
Master Protein	D3YZU5	SH3 and multiple ankyrin repeat domains protein 1 OS=Mus musculus GN=Shank1 PE=1 SV=1	Shank1	243961	ENSMUSG00000038738	High	FALSE	75	1088	72	0	557.074	4358.52	46.3855	16.993	7	cell differentiation;cell organization and biogenesis;regulation of biological process;response to stimulus	cytoplasm;membrane;nucleus	DNA binding;protein binding;structural molecule activity	Pf00018, Pf00023, Pf00536, Pf00595, Pf02198, Pf07647, Pf07653, Pf12796, Pf13637, Pf13857, Pf14604	1.053	1.054	0.957	0.944	1.015	0.991	0.898	0.897	1.026	1.017	0.909	0.902	1.011	1.013	1.063	1.054	0.912	0.903	0.929	0.924	0.938	0.928	0.927	0.918	0.965	0.956	1.006	0.994	1.041
Master Protein	B6ZHD0	Erythrocyte protein band 4.1-like 2 OS=Mus musculus GN=Epb4.1l2 PE=2 SV=1	Epb4.1l2; Epb41l2	13822		High	FALSE	72	1358	2	0	555.913	5022.16	53.7449	99	10	cell organization and biogenesis;regulation of biological process	cytoplasm;cytoskeleton;membrane;nucleus	protein binding;structural molecule activity	Pf00373, Pf04382, Pf05902, Pf08736, Pf09379, Pf09380	0.867	0.877	0.91	0.918	0.865	0.858	0.904	0.89	0.925	0.938	0.931	0.95	0.836	0.851	0.894	0.902	0.851	0.837	0.951	0.957	0.906	0.93	0.896	0.916	0.941	0.945	0.989	0.998	0.97
Master Protein	Q8R0Y6	Cytosolic 10-formyltetrahydrofolate dehydrogenase OS=Mus musculus GN=Aldh1l1 PE=1 SV=1	Aldh1l1	107747	ENSMUSG00000030088	High	FALSE	60	1241	55	0	555.11	5353.48	74.2794	102.847	6	metabolic process	cytoplasm;mitochondrion	catalytic activity;protein binding	Pf00171, Pf00550, Pf00551, Pf02911	0.892	0.891	0.83	0.819	0.896	0.883	0.86	0.892	1.004	1.001	0.96	0.964	0.861	0.876	0.879	0.875	0.828	0.836	0.988	0.988	0.936	0.939	0.929	0.933	0.928	0.93	0.948	0.948	0.946
Master Protein	D3Z3M7	CAP-Gly domain-containing linker protein 1 OS=Mus musculus GN=Clip1 PE=1 SV=1	Clip1	56430	ENSMUSG00000049550	High	FALSE	88	865	7	0	554.415	3199.35	61.6667	25.367	5	cell organization and biogenesis;regulation of biological process;transport	cytoplasm;cytoskeleton;endosome;membrane	catalytic activity;metal ion binding;motor activity;protein binding;structural molecule activity;transporter activity	Pf00038, Pf01302, Pf01496, Pf01576, Pf02463, Pf05483, Pf05557, Pf05667, Pf05701, Pf07888, Pf09726, Pf12128, Pf13166, Pf13514	1.022	1.005	0.93	0.919	1.025	1.013	0.893	0.905	1.023	1.001	0.947	0.933	0.989	0.973	1.01	0.982	0.918	0.903	1.065	1.032	0.96	0.968	0.907	0.899	0.992	0.992	1.064	1.034	1.067
Master Protein	Q99PV0	Pre-mRNA-processing-splicing factor 8 OS=Mus musculus GN=Prpf8 PE=1 SV=2	Prpf8	192159	ENSMUSG00000020850	High	FALSE	85	622	84	0	554.343	2408.37	43.2548	7.417	11	cell organization and biogenesis;metabolic process;response to stimulus	membrane;nucleus;spliceosomal complex	catalytic activity;protein binding;RNA binding	Pf01398, Pf08082, Pf08083, Pf08084, Pf10596, Pf10597, Pf10598, Pf12134	1	1.007	0.927	0.908	0.976	0.987	0.883	0.909	1.019	1.021	0.957	0.954	1.012	1.008	0.995	1.005	0.897	0.903	1.023	1.015	0.931	0.919	0.948	0.934	0.963	0.976	1.013	1.01	0.99
Master Protein	P58252	Elongation factor 2 OS=Mus musculus GN=Eef2 PE=1 SV=2	Eef2	13629	ENSMUSG00000034994	High	FALSE	62	1829	61	0	553.335	7059.56	75.9907	243.844	10	cell differentiation;cell proliferation;metabolic process;regulation of biological process;response to stimulus	cytoplasm;cytosol;membrane;nucleus;ribosome	catalytic activity;nucleotide binding;protein binding;RNA binding	Pf00009, Pf00679, Pf03144, Pf03764, Pf14492	0.916	0.923	0.962	0.946	0.906	0.913	0.991	1.011	0.956	0.961	1.041	1.035	0.891	0.894	0.921	0.926	0.931	0.938	0.989	0.991	1.039	1.039	1.008	1.005	0.895	0.91	0.982	0.98	0.951
Master Protein	O54774	AP-3 complex subunit delta-1 OS=Mus musculus GN=Ap3d1 PE=1 SV=1	Ap3d1	11776	ENSMUSG00000020198	High	FALSE	57	1173	57	0	552.529	4787.74	52.794	69.17	10	cell organization and biogenesis;cellular component movement;regulation of biological process;transport	cytoplasm;Golgi;membrane		Pf01602, Pf06375	0.954	0.946	0.977	0.968	0.938	0.962	0.961	0.943	0.982	0.972	1.01	1.012	0.933	0.933	0.965	0.947	0.932	0.918	0.966	0.955	0.99	0.994	0.988	0.992	0.927	0.954	0.983	0.972	0.971
Master Protein	Q3UAA9	Putative uncharacterized protein OS=Mus musculus GN=Actb PE=2 SV=1	Actb	11461		High	FALSE	44	13544	2	0	552.063	57910.4	93.0667	122167	5	cell organization and biogenesis;response to stimulus	cytoplasm;cytoskeleton;cytosol;membrane	DNA binding;nucleotide binding;protein binding	Pf00022	1.108	1.082				0.949	0.738	0.883	0.982	1.056			0.966	0.99	1.165	1.146	0.74	0.798	0.991	1.009						0.962	0.969	1.035
Master Protein	Q91VD9	NADH-ubiquinone oxidoreductase 75 kDa subunit, mitochondrial OS=Mus musculus GN=Ndufs1 PE=1 SV=2	Ndufs1	227197	ENSMUSG00000025968	High	FALSE	49	1884	49	0	551.762	7549.41	77.0289	487.527	1	cell organization and biogenesis;metabolic process;transport	membrane;mitochondrion	catalytic activity;metal ion binding	Pf00111, Pf00384, Pf09326, Pf10588, Pf13510	0.945	0.967	0.95	0.956	1.014	1.018	0.971	0.987	0.951	0.964	1.007	1.015	0.94	0.932	0.941	0.969	0.954	0.954	0.953	0.967	0.962	0.963	0.939	0.941	1.016	1.013	0.992	1.006	1.05
Master Protein	Q8K1M6-3	Isoform 3 of Dynamin-1-like protein OS=Mus musculus GN=Dnm1l	Dnm1l	74006	ENSMUSG00000022789	High	FALSE	60	1834	1	0	549.943	7054.48	84.5494	274.423	16	cell death;cell organization and biogenesis;regulation of biological process;transport	cytoplasm;cytoskeleton;cytosol;Golgi;membrane;mitochondrion	catalytic activity;nucleotide binding;protein binding	Pf00350, Pf01031, Pf02212							1.037	1.092									0.919	0.892
Master Protein	P62814	V-type proton ATPase subunit B, brain isoform OS=Mus musculus GN=Atp6v1b2 PE=1 SV=1	Atp6v1b2	11966	ENSMUSG00000006273	High	FALSE	42	5189	21	0	549.205	20909.6	85.91	4297.66	8	metabolic process;transport	cytoplasm;cytosol;membrane	catalytic activity;nucleotide binding;transporter activity	Pf00006, Pf00306, Pf02874	0.953	0.95	0.968	0.958	0.974	0.952	0.932	0.937	0.961	0.945	0.962	0.969	0.976	0.969	0.955	0.951	0.906	0.904	0.926	0.916	0.965	0.972	0.954	0.964	0.971	0.953	0.974	0.968	0.999
Master Protein	Q8C605	6-phosphofructokinase OS=Mus musculus GN=Pfkp PE=1 SV=1	Pfkp	56421	ENSMUSG00000021196	High	FALSE	53	1793	48	0	548.679	6575.36	63.7755	1117.87	13	cell organization and biogenesis;metabolic process	cytoplasm;cytosol;membrane;nucleus	catalytic activity;metal ion binding;nucleotide binding;protein binding	Pf00365	0.98	0.992	0.924	0.899	0.956	0.969	0.956	0.931	1.015	1.015	0.948	0.93	0.936	0.949	0.978	0.989	0.9	0.883	1.035	1.022	0.958	0.948	0.936	0.919	0.986	1.005	1.035	1.042	1.034
Master Protein	P23819-3	Isoform 3 of Glutamate receptor 2 OS=Mus musculus GN=Gria2	Gria2			High	FALSE	62	1884	1	0	547.127	7345.13	56.9755	156.191			membrane	receptor activity;signal transducer activity;transporter activity	Pf00060, Pf00497, Pf01094, Pf10613, Pf13458							0.841										0.929
Master Protein	Q4ACU6	SH3 and multiple ankyrin repeat domains protein 3 OS=Mus musculus GN=Shank3 PE=1 SV=3	Shank3	58234	ENSMUSG00000022623	High	FALSE	74	744	23	0	547.09	2926.1	52.7746	31.502	15	cell differentiation;cell organization and biogenesis;cellular homeostasis;metabolic process;regulation of biological process;response to stimulus	cytoplasm;membrane;nucleus	DNA binding;metal ion binding;protein binding;structural molecule activity	Pf00018, Pf00023, Pf00536, Pf02198, Pf07647, Pf07653, Pf12796, Pf13637, Pf13857, Pf14604	1.037	1.043	0.942	0.916	1.072	1.058	0.928	0.918	1.022	1.027	0.929	0.911	1.013	1.009	1.03	1.03	0.972	0.958	1.202	1.167	0.922	0.915	0.883	0.87	1.024	1.031	1.085	1.08	1.078
Master Protein	F6ZDS4	Nucleoprotein TPR OS=Mus musculus GN=Tpr PE=1 SV=1	Tpr	108989	ENSMUSG00000006005	High	FALSE	102	659	102	0	547.03	2335.67	40.1481	7.815	1	cell division;cell organization and biogenesis;metabolic process;regulation of biological process;response to stimulus;transport	chromosome;cytoplasm;cytoskeleton;Golgi;membrane;nucleus	catalytic activity;motor activity;protein binding;RNA binding;structural molecule activity;transporter activity	Pf00038, Pf01496, Pf01576, Pf02463, Pf04111, Pf04156, Pf07926, Pf08317, Pf09726, Pf12128, Pf13166, Pf14915, Pf15070	1.004	1.006	0.92	0.917	0.979	0.971	0.889	0.886	1.032	1.018	0.957	0.966	0.96	0.973	1.017	1.004	0.906	0.909	1.032	1.027	0.937	0.945	0.922	0.914	0.968	0.962	1.008	1.015	1
Master Protein	Q5J8K6	CAST1/ERC2 splicing variant-3 OS=Mus musculus GN=Erc2 PE=2 SV=1	Erc2	238988		High	FALSE	81	1267	3	0	546.303	4777.6	58.2027	125.748	14	transport	cytoplasm;cytoskeleton;membrane	protein binding;transporter activity	Pf01496, Pf04156, Pf10174, Pf13166	0.977	1.038	0.992	0.961	1.054	1.098	0.902	0.939	0.985	1.013	0.885	0.9	0.956	1.067	0.977	1.023	0.944	0.942	1.01	0.967	0.9	0.921	0.875	0.897	0.988	1.033	0.992	0.976	1.028
Master Protein	Q922J3	CAP-Gly domain-containing linker protein 1 OS=Mus musculus GN=Clip1 PE=1 SV=1	Clip1	56430	ENSMUSG00000049550	High	FALSE	87	836	6	0	544.881	3094	60.2444	19.134	5	cell organization and biogenesis;regulation of biological process;transport	cytoplasm;cytoskeleton;endosome;Golgi;membrane	catalytic activity;metal ion binding;motor activity;protein binding;structural molecule activity	Pf00038, Pf01302, Pf01576, Pf02463, Pf07888, Pf09730, Pf10174, Pf12128, Pf13166, Pf13514	1.019	1.102	0.866	0.91	1.171	1.016	0.801	0.843	1.017	0.983	0.872	0.909	1.04	1.1	1.006	0.99	1.028	0.923	0.988	0.969	0.911	0.902	0.865	0.856	0.973	0.915	1.065	1.088	1.168
Master Protein	A2AGQ8	MAP kinase-activating death domain protein OS=Mus musculus GN=Madd PE=1 SV=1	Madd	228355	ENSMUSG00000040687	High	FALSE	61	883	3	0	542.969	3703.64	45.7106	23.195	2	cell death;regulation of biological process	cytoplasm;cytosol;membrane;nucleus		Pf02141, Pf03455, Pf03456	0.901	0.991	0.973	0.975	1.064	1.027	0.984	0.941	0.999	1.017	0.925	0.994	0.845	1.056	0.919	0.963	0.903	0.913	0.938	1	0.947	0.963	0.876	0.964	1.033	0.995	0.947	1.02	1.11
Master Protein	B9EKK3	IQ motif containing GTPase activating protein 2 OS=Mus musculus GN=Iqgap2 PE=2 SV=1	Iqgap2	544963		High	FALSE	80	710	37	0	542.965	2823.86	56.5714	18.179	13	cell organization and biogenesis;regulation of biological process;response to stimulus	cell surface;cytoplasm	enzyme regulator activity;protein binding	Pf00307, Pf00616, Pf03836	1.075	1.083	0.935	0.965	1.098	1.096	0.903	0.933	0.92	0.934	0.849	0.882	1.002	1.006	1.112	1.102	1.022	1.041	0.889	0.904	0.886	0.907	0.876	0.893	0.951	0.946	0.943	0.945	1.038
Master Protein	Q04690	Neurofibromin OS=Mus musculus GN=Nf1 PE=1 SV=1	Nf1	18015	ENSMUSG00000020716	High	FALSE	85	703	62	0	542.938	2640.32	36.0788	5.511	11	cell communication;cell differentiation;cell organization and biogenesis;metabolic process;regulation of biological process;response to stimulus;transport	cytoplasm;membrane;nucleus	enzyme regulator activity;protein binding	Pf00616, Pf13716	0.972	0.954	0.953	0.939	0.973	0.958	0.924	0.956	1.019	0.991	0.982	0.971	0.973	0.959	0.985	0.972	0.911	0.918	1.038	0.999	0.954	0.941	0.971	0.964	1.032	1.006	1.029	0.984	1.008
Master Protein	Q3UHT7	Putative uncharacterized protein OS=Mus musculus GN=Erc2 PE=2 SV=1	Erc2	238988		High	FALSE	82	1237	4	0	540.779	4591.83	58.7513	109.53	14	transport	cytoplasm;cytoskeleton;membrane	protein binding;transporter activity	Pf01496, Pf04156, Pf10174, Pf13166	1.044	1.053	0.99	0.969	1.068	1.061	0.906	0.913	1.018	1.019	0.954	0.95	1.013	1.037	1.058	1.061	0.974	0.973	1.038	1.039	0.94	0.932	0.913	0.906	0.993	0.999	1.061	1.061	1.088
Master Protein	Q8BH59	Calcium-binding mitochondrial carrier protein Aralar1 OS=Mus musculus GN=Slc25a12 PE=1 SV=1	Slc25a12	78830	ENSMUSG00000027010	High	FALSE	46	2002	40	0	540.488	8656.82	79.0251	406.152	2	metabolic process;response to stimulus;transport	membrane;mitochondrion	metal ion binding;structural molecule activity;transporter activity	Pf00153, Pf13499	0.971	0.965	0.976	0.97	0.995	0.997	0.903	0.914	0.957	0.941	0.935	0.934	0.98	0.969	0.987	0.97	0.955	0.959	0.919	0.915	0.957	0.959	0.977	0.971	0.978	0.979	0.948	0.939	1.007
Master Protein	K3W4T3	V-type proton ATPase 116 kDa subunit a isoform 1 OS=Mus musculus GN=Atp6v0a1 PE=1 SV=1	Atp6v0a1		ENSMUSG00000019302	High	FALSE	41	2535	8	0	538.408	10259.1	44.0334	401.394	11	transport	membrane	transporter activity	Pf01496	0.973	0.982	0.976	0.957	0.995	0.971	0.932	0.953	0.977	0.977	0.965	0.946	0.961	0.974	0.97	0.98	0.931	0.941	0.95	0.954	0.963	0.943	0.951	0.933	0.978	0.961	0.986	0.987	1.026
Master Protein	P20029	78 kDa glucose-regulated protein OS=Mus musculus GN=Hspa5 PE=1 SV=3	Hspa5	14828	ENSMUSG00000026864	High	FALSE	54	2736	51	0	535.499	10766.7	64.1221	754.177	2	cell communication;cell organization and biogenesis;metabolic process;regulation of biological process;response to stimulus;transport	cell surface;cytoplasm;endoplasmic reticulum;extracellular;membrane;mitochondrion;nucleus;organelle lumen	catalytic activity;nucleotide binding;protein binding	Pf00012, Pf01968, Pf06723	0.986	0.982	0.91	0.898	0.978	0.976	0.957	0.985	1.045	1.038	1.028	1.047	0.977	0.979	0.975	0.974	0.859	0.876	1.04	1.028	1.014	1.029	0.924	0.941	1.003	1.013	1.037	1.026	1.009
Master Protein	Q4LG64	AMPA-selective glutamate receptor 2 flip type OS=Mus musculus GN=Gria2 PE=2 SV=1	Gria2	14800		High	FALSE	60	1846	1	0	535.444	7180.43	59.6829	202.092	3	cell communication;cell organization and biogenesis;metabolic process;regulation of biological process;response to stimulus;transport	cell surface;endoplasmic reticulum;membrane	protein binding;receptor activity;signal transducer activity;transporter activity	Pf00060, Pf00497, Pf01094, Pf10613, Pf13458		0.352	1.376	1.5		0.426		1.352		0.411	1.146	1.278		0.248		0.3		1.706		0.395	1.32	1.373	1.207	1.417		0.383		0.461
Master Protein	P17156	Heat shock-related 70 kDa protein 2 OS=Mus musculus GN=Hspa2 PE=1 SV=2	Hspa2	15512	ENSMUSG00000059970	High	FALSE	58	3150	33	0	535.182	13438.5	85.94	1480.6	12	cell differentiation;cell organization and biogenesis;metabolic process;regulation of biological process;response to stimulus	cell surface;cytoplasm;cytoskeleton;cytosol;membrane;mitochondrion;nucleus	nucleotide binding;protein binding	Pf00012, Pf06723	0.983	1.006	0.911	0.91	0.987	0.98	0.836	0.842	0.906	0.931	0.91	0.917	0.956	0.976	0.973	0.98	0.932	0.921	0.958	0.994	0.893	0.894	0.898	0.922	0.89	0.9	0.962	0.983	0.939
Master Protein	Q64487	Receptor-type tyrosine-protein phosphatase delta OS=Mus musculus GN=Ptprd PE=1 SV=3	Ptprd	19266	ENSMUSG00000028399	High	FALSE	71	861	55	0	534.401	3443.82	49.0063	10.103	4	cell differentiation;cell organization and biogenesis;metabolic process;regulation of biological process	membrane	catalytic activity;protein binding	Pf00041, Pf00047, Pf00102, Pf07679, Pf13895, Pf13927, Pf14566	1.015	1.006	0.938	0.957	0.963	0.976	0.888	0.913	1.022	1.026	0.943	0.967	1.018	0.998	1.019	1.009	0.892	0.92	1.023	1.024	0.934	0.961	0.963	0.976	0.945	0.967	1.021	1.013	0.985
Master Protein	P40142	Transketolase OS=Mus musculus GN=Tkt PE=1 SV=1	Tkt	21881	ENSMUSG00000021957	High	FALSE	42	1721	42	0	533.958	8114.05	68.8604	828.696	14	metabolic process;regulation of biological process	membrane;nucleus	catalytic activity;metal ion binding;protein binding	Pf00456, Pf00676, Pf02779, Pf02780	0.928	0.924	0.88	0.872	0.926	0.931	0.935	0.946	1.029	1.01	0.976	0.974	0.899	0.901	0.951	0.952	0.833	0.829	1.057	1.035	0.93	0.932	0.969	0.972	1.004	1.011	1.022	1.005	0.967
Master Protein	B9EJA4	Clasp2 protein OS=Mus musculus GN=Clasp2 PE=2 SV=1	Clasp2	76499		High	FALSE	74	946	2	0	533.224	3500.55	65.2141	34.287	9	cell division;cell organization and biogenesis;cellular component movement;regulation of biological process;response to stimulus	chromosome;cytoplasm;cytoskeleton;Golgi;membrane	protein binding	Pf12348	1.027	1.018	0.934	0.922	0.981	0.978	0.987	0.97	1.02	1.02	0.98	0.971	0.978	0.969	1.003	0.988	0.914	0.899	1.032	1.039	0.973	0.965	0.984	0.977	0.995	1	1.034	1.043	1.016
Master Protein	Q9Z0H8	CAP-Gly domain-containing linker protein 2 OS=Mus musculus GN=Clip2 PE=1 SV=2	Clip2	269713	ENSMUSG00000063146	High	FALSE	73	884	62	0	533.07	3338.99	66.9532	49.894	5	regulation of biological process	cytoplasm;cytoskeleton;Golgi	catalytic activity;motor activity;protein binding	Pf01302, Pf01576, Pf02463, Pf05557, Pf08317, Pf10174, Pf12128, Pf13514, Pf14257, Pf15070	0.99	1	0.911	0.907	0.972	0.989	0.898	0.924	1.034	1.02	0.935	0.954	0.94	0.967	0.998	0.998	0.901	0.934	1.114	1.084	0.945	0.953	0.928	0.934	0.991	0.983	1.053	1.044	1.017
Master Protein	E9PZ16	Basement membrane-specific heparan sulfate proteoglycan core protein OS=Mus musculus GN=Hspg2 PE=4 SV=1	Hspg2	15530	ENSMUSG00000028763	High	FALSE	79	710	14	0	532.762	2720.04	24.0018	2.849	4	cell differentiation;cell organization and biogenesis	extracellular	metal ion binding;protein binding	Pf00008, Pf00047, Pf00052, Pf00053, Pf00054, Pf00057, Pf02210, Pf07679, Pf07686, Pf12785, Pf13385, Pf13895, Pf13927	0.966	0.97	0.892	0.912	0.86	0.872	0.921	0.948	1.064	1.048	0.905	0.922	0.97	0.985	0.929	0.943	0.929	0.942	0.995	0.981	0.94	0.963	0.86	0.87	0.962	0.968	1.113	1.084	0.941
Master Protein	P09411	Phosphoglycerate kinase 1 OS=Mus musculus GN=Pgk1 PE=1 SV=4	Pgk1	18655	ENSMUSG00000066632; ENSMUSG00000062070	High	FALSE	46	4388	35	0	531.974	17054.3	93.0456	13737.2	X; 12	metabolic process	cytoplasm;cytosol;membrane	catalytic activity;nucleotide binding	Pf00162	0.965	0.975	0.912	0.895	0.979	0.97	0.95	0.963	1.025	1.033	0.956	0.951	0.933	0.943	0.975	0.986	0.868	0.875	0.993	0.996	0.955	0.945	0.948	0.942	1.015	1.01	1.021	1.028	1.046
Master Protein	Q3UNH4	G protein-regulated inducer of neurite outgrowth 1 OS=Mus musculus GN=Gprin1 PE=1 SV=2	Gprin1	26913	ENSMUSG00000069227	High	FALSE	81	1468	81	0	531.683	5258.52	76.5021	67.84	13	cell organization and biogenesis	membrane	protein binding	Pf15235	1.116	1.113	0.956	0.947	1.073	1.072	0.857	0.868	0.996	0.996	0.868	0.869	0.985	0.977	1.041	1.043	0.952	0.949	1.214	1.198	0.976	0.991	0.88	0.895	0.989	0.994	1.154	1.14	1.162
Master Protein	Q91XM9-7	Isoform 7 of Disks large homolog 2 OS=Mus musculus GN=Dlg2	Dlg2			High	FALSE	55	1441	6	0	531.211	5919.44	61.2705	82.053				protein binding	Pf00018, Pf00595, Pf00625, Pf07653, Pf09058, Pf10600, Pf13180	1.006	1.006	0.986	0.967	1.019	0.994	0.923	0.927	1.024	1.011	0.984	0.968	0.985	0.983	1.024	1.016	0.954	0.953	1.028	1.013	0.971	0.962	0.946	0.941	0.944	0.936	1.023	1.014	1.039
Master Protein	Q9JME5	AP-3 complex subunit beta-2 OS=Mus musculus GN=Ap3b2 PE=1 SV=2	Ap3b2	11775	ENSMUSG00000062444	High	FALSE	66	1110	56	0	530.535	4098.95	62.0148	66.002	7	cellular component movement;transport	cytoplasm;Golgi;membrane		Pf01602, Pf12717, Pf13646, Pf14796	0.98	1.013	0.948	0.934	1	0.959	0.94	0.943	0.995	1.021	1	0.984	0.945	0.98	0.997	1.019	0.933	0.936	0.986	1.002	0.973	0.958	0.965	0.954	0.988	0.96	1.005	1.013	1.037
Master Protein	Q08EB6	CLIP associating protein 2 OS=Mus musculus GN=Clasp2 PE=1 SV=1	Clasp2	76499	ENSMUSG00000033392	High	FALSE	73	958	1	0	530.306	3546.29	64.9573	34.828	9	cell division;cell organization and biogenesis;cellular component movement;regulation of biological process;response to stimulus	chromosome;cytoplasm;cytoskeleton;Golgi;membrane	protein binding	Pf12348	1.176	1	0.905	0.967	1.079	1.073	0.975	1.181	1.049	0.993	0.945	0.94	1.098	0.925	1.032	0.961	0.831	1.056	1.205	1.044	1.003	0.933	0.93	1.047	1.171	1.095	1.201	0.91	1.165
Master Protein	E9PZ43	Microtubule-associated protein OS=Mus musculus GN=Map4 PE=1 SV=1	Map4; Mtap4	17758	ENSMUSG00000032479	High	FALSE	65	1266	34	0	526.135	4732.1	65.4877	125.385	9	cell division;cell organization and biogenesis;cellular component movement	cytoplasm;cytoskeleton;membrane	protein binding;RNA binding	Pf00418	1.08	1.073	0.929	0.922	1.009	1.009	1.001	1.004	1.017	1.004	0.921	0.911	0.965	0.968	1.022	1.01	0.885	0.867	1.012	1.003	0.981	0.97	0.95	0.962	1.012	1.035	1.033	1.017	1.093
Master Protein	P28652	Calcium/calmodulin-dependent protein kinase type II subunit beta OS=Mus musculus GN=Camk2b PE=1 SV=2	Camk2b	12323	ENSMUSG00000057897	High	FALSE	40	4480	1	0	525.216	18687.7	81.9188	4100.13	11	cell differentiation;cell organization and biogenesis;metabolic process;regulation of biological process;response to stimulus;transport	cytoplasm;cytoskeleton;cytosol;endoplasmic reticulum;membrane	catalytic activity;nucleotide binding;protein binding	Pf00069, Pf07714, Pf08332, Pf12680, Pf13474, Pf14534	1	1.059	1.162	1.218	1.303	1.076	1.554	1.323	1.175	1.181	1.47	1.759	0.961	1.096	0.939	1.066	1.238	1.119	0.922	1.2	1.337	1.495	1.435	1.694	1.087	1.001	1.071	1.118	1.229
Master Protein	Q6TA13	Kinesin-like protein KIF1A OS=Mus musculus GN=Kif1a PE=2 SV=1	Kif1a	16560	ENSMUSG00000014602	High	FALSE	79	834	2	0	524.509	3066.73	53.9458	15.127	1	cellular component movement;metabolic process;transport	cytoplasm;cytoskeleton	catalytic activity;motor activity;nucleotide binding;protein binding	Pf00169, Pf00225, Pf00498, Pf12423, Pf12473	0.986	0.973	0.891	0.894	0.976	0.972	0.935	0.962	1.072	1.047	0.969	0.965	0.962	0.954	0.996	0.979	0.87	0.875	1.052	1.03	0.938	0.94	0.944	0.948	0.997	0.98	1.044	1.026	1.01
Master Protein	Q5SVJ0	Calcium/calmodulin-dependent protein kinase II, beta, isoform CRA_b OS=Mus musculus GN=Camk2b PE=1 SV=1	Camk2b	12323	ENSMUSG00000057897	High	FALSE	40	4466	1	0	523.893	18629.6	66.8168	1063.21	11	cell differentiation;cell organization and biogenesis;metabolic process;regulation of biological process;response to stimulus;transport	cytoplasm;cytoskeleton;cytosol;endoplasmic reticulum;membrane	catalytic activity;nucleotide binding;protein binding	Pf00069, Pf07714, Pf08332, Pf12680, Pf13474, Pf14534	0.944	0.96	1.045	1.022	1.058	1.07	0.984	0.998	0.915	0.916	1.053	1.044	0.949	0.967	0.962	0.972	1.03	1.041	0.905	0.906	1.006	0.998	1.035	1.031	0.908	0.923	0.959	0.956	1.013
Master Protein	Q11011	Puromycin-sensitive aminopeptidase OS=Mus musculus GN=Npepps PE=1 SV=2	Npepps	19155	ENSMUSG00000001441	High	FALSE	50	1795	50	0	522.747	7060.4	63.2609	111.884	11	metabolic process;response to stimulus	cytoplasm;cytosol;membrane;nucleus	catalytic activity;metal ion binding	Pf01433, Pf11838, Pf13485	0.96	0.984	0.925	0.909	0.974	0.962	0.938	0.937	1.012	1.039	1.015	1.008	0.944	0.967	0.978	0.994	0.902	0.892	0.988	1.007	0.954	0.956	0.952	0.952	0.971	0.98	1.048	1.069	1.013
Master Protein	Q80TN1	MKIAA0968 protein (Fragment) OS=Mus musculus GN=Camk2a PE=2 SV=3	Camk2a	12322		High	FALSE	44	5288	30	0	522.475	23362.5	82.5462	9235.71	18	cell organization and biogenesis;metabolic process;regulation of biological process;response to stimulus;transport	cytoplasm;membrane;mitochondrion;nucleus	catalytic activity;nucleotide binding;protein binding	Pf00069, Pf07714, Pf08332, Pf13474, Pf14534	0.963	0.954	1.041	1.016	1.031	1.039	0.928	0.911	0.891	0.907	1.016	1.001	0.966	0.973	0.984	0.99	1.037	1.019	0.918	0.941	0.95	0.936	1.005	0.994	0.877	0.91	0.944	0.96	0.975
Master Protein	B0V2N1	Receptor-type tyrosine-protein phosphatase S OS=Mus musculus GN=Ptprs PE=1 SV=1	Ptprs	19280	ENSMUSG00000013236	High	FALSE	57	875	2	0	516.794	3651.27	45.8836	9.701	17	metabolic process	membrane	catalytic activity;protein binding	Pf00041, Pf00047, Pf00102, Pf07679, Pf09294, Pf13895, Pf13927, Pf14566	1.021	1.059	0.986	0.973	1.03	1.04	0.894	0.903	0.976	1.002	0.963	0.966	1.042	1.099	1.01	1.046	0.926	0.923	0.98	1.002	0.965	0.951	0.949	0.945	0.967	0.98	0.992	1.013	1.009
Master Protein	Q91XV3	Brain acid soluble protein 1 OS=Mus musculus GN=Basp1 PE=1 SV=3	Basp1	70350	ENSMUSG00000045763	High	FALSE	36	4687	36	0	516.58	22915.9	94.2478	8.11131e+08	15	cell differentiation;regulation of biological process	cytoplasm;membrane;nucleus	DNA binding;protein binding		1.041	1.036	1.077	1.053	1.014	1.006	0.949	0.976	1.105	1.086	1.03	1.018	1.083	1.08	1.071	1.069	0.98	0.993	1.137	1.117	1.011	1	1.028	1.015	1.082	1.071	1.144	1.123	1.072
Master Protein	Q9WUB3	Glycogen phosphorylase, muscle form OS=Mus musculus GN=Pygm PE=1 SV=3	Pygm	19309	ENSMUSG00000032648; ENSMUSG00000106877	High	FALSE	61	1413	46	0	516.118	5138.45	68.171	115.895	19; CHR_MG4249_PATCH	cellular homeostasis;metabolic process;response to stimulus	cytoplasm;endoplasmic reticulum	catalytic activity;nucleotide binding	Pf00343	1.005	1.01	0.85	0.859	0.98	0.961	0.981	0.997	1.115	1.118	0.974	1.002	0.918	0.916	0.981	0.978	0.868	0.873	1.167	1.161	0.899	0.92	0.934	0.953	1.079	1.07	1.138	1.134	1.083
Master Protein	Q9JKR6	Hypoxia up-regulated protein 1 OS=Mus musculus GN=Hyou1 PE=1 SV=1	Hyou1	12282	ENSMUSG00000032115	High	FALSE	56	856	56	0	516.009	3487.84	57.8579	84.77	9	regulation of biological process;response to stimulus;transport	endoplasmic reticulum;extracellular;membrane;organelle lumen	nucleotide binding	Pf00012	0.955	0.964	0.938	0.926	0.979	0.963	0.946	0.945	0.996	0.991	1.022	1.027	0.948	0.955	0.96	0.968	0.892	0.876	1.004	0.996	0.99	0.991	0.974	0.971	0.989	0.995	0.999	1.006	0.992
Master Protein	B2RXT3	Ogdhl protein OS=Mus musculus GN=Ogdhl PE=2 SV=1	Ogdhl	239017		High	FALSE	50	1564	39	0	515.033	6601.4	56.9307	129.432	14	metabolic process	cytosol;mitochondrion	catalytic activity	Pf00676, Pf02779	0.95	0.983	0.982	0.964	0.956	0.929	0.961	0.954	0.983	1.022	1.02	1.01	0.959	1.001	0.947	0.973	0.94	0.93	0.973	0.991	0.993	0.974	1.002	0.98	0.999	0.966	0.989	1.006	1.015
Master Protein	H3BJZ7	Protein unc-13 homolog A OS=Mus musculus GN=Unc13a PE=1 SV=1	Unc13a	382018	ENSMUSG00000034799	High	FALSE	77	744	59	0	514.71	2813.8	49.7978	17.537	8	cell communication;cell differentiation;cell organization and biogenesis;metabolic process;regulation of biological process;response to stimulus;transport	cytoplasm;membrane	metal ion binding;protein binding	Pf00130, Pf00168, Pf06292, Pf10540	0.981	0.993	0.997	1.013	1.029	1.031	0.912	0.92	0.971	0.976	0.971	0.99	0.958	0.997	0.975	1.002	0.971	0.99	0.988	0.984	0.949	0.965	0.95	0.963	0.984	0.977	1.013	1.008	1.042
Master Protein	Q3UDK4	Annexin OS=Mus musculus GN=Anxa6 PE=2 SV=1	Anxa6	11749		High	FALSE	63	1299	9	0	514.542	4856.28	79.792	250.189	11	cell organization and biogenesis;cellular homeostasis;regulation of biological process;response to stimulus;transport	cytoplasm;membrane;nucleus	metal ion binding;nucleotide binding;protein binding;transporter activity	Pf00191	0.92	0.92	0.854	0.853	0.93	0.94	0.914	0.947	0.974	0.971	0.999	0.982	0.93	0.936	0.936	0.938	0.868	0.884	0.998	0.993	0.929	0.939	0.932	0.929	0.981	0.995	1.029	1.024	1.007
Master Protein	Q3TFD9	Putative uncharacterized protein OS=Mus musculus GN=Vim PE=2 SV=1	Vim	22352		High	FALSE	56	2776	2	0	514.525	10415.6	83.9056	2760.7	2	cell differentiation;cell organization and biogenesis;metabolic process;regulation of biological process;response to stimulus	cytoplasm;cytoskeleton;cytosol;membrane	protein binding;RNA binding;structural molecule activity	Pf00038, Pf04111, Pf04156, Pf04732, Pf05622, Pf10186	0.691	0.69	0.615	0.629	0.726	0.734	0.738	0.736	0.751	0.765	0.795	0.814	0.716	0.711	0.728	0.715	0.622	0.604	0.69	0.697	0.783	0.801	0.675	0.693	0.731	0.739	0.76	0.759	0.725
Master Protein	Q542X7	Chaperonin subunit 2 (Beta), isoform CRA_a OS=Mus musculus GN=Cct2 PE=2 SV=1	Cct2	12461	ENSMUSG00000034024	High	FALSE	45	1558	45	0	514.347	6451.32	83.9252	773.264	10	cell organization and biogenesis;metabolic process;regulation of biological process;transport	cytoplasm	nucleotide binding;protein binding	Pf00118	1.009	1.011	0.945	0.922	0.977	0.986	0.936	0.949	1.02	1.031	0.99	0.979	1.013	1.012	1.036	1.019	0.906	0.91	0.988	0.991	0.952	0.944	0.96	0.954	1.013	1.033	1.023	1.032	0.997
Master Protein	Q99JX6	Annexin OS=Mus musculus GN=Anxa6 PE=2 SV=1	Anxa6	11749		High	FALSE	63	1399	9	0	513.306	5260.66	81.7091	250.189	11	cell organization and biogenesis;cellular homeostasis;regulation of biological process;response to stimulus;transport	cytoplasm;membrane;nucleus	metal ion binding;nucleotide binding;protein binding;transporter activity	Pf00191	0.835	0.82	1.135	1.15	1.169	1.113	1.24	1.3	0.889	0.881	0.971	0.967	0.866	0.835	0.842	0.828	0.841	0.846	0.914	0.879	1.277	1.338	0.96	0.926	0.882	0.918	0.958	0.935	0.892
Master Protein	B8QI35	Liprin-alpha 3 OS=Mus musculus GN=Ppfia3 PE=1 SV=1	Ppfia3	76787	ENSMUSG00000003863	High	FALSE	76	1097	65	0	513.192	4111.33	62.6466	38.137	7	regulation of biological process;transport	cell surface;cytoplasm	protein binding	Pf00536, Pf04156, Pf07647, Pf12128	1.015	1.034	0.958	0.936	1.035	1.033	0.929	0.957	0.998	1.003	0.945	0.932	0.984	1.038	1.002	1.012	0.916	0.94	1.015	1.048	0.936	0.931	0.916	0.919	0.988	0.988	1.029	1.05	1.046
Master Protein	Q64332-2	Isoform IIb of Synapsin-2 OS=Mus musculus GN=Syn2	Syn2	20965	ENSMUSG00000009394	High	FALSE	31	4992	1	0	513.066	22927.6	73.904	8316.64	6	transport	membrane	catalytic activity;nucleotide binding;protein binding	Pf02078, Pf02750, Pf10581				1.229			0.996					1.198					0.958					1.207		1.242
Master Protein	Q04447	Creatine kinase B-type OS=Mus musculus GN=Ckb PE=1 SV=1	Ckb	12709	ENSMUSG00000001270	High	FALSE	39	9815	37	0	512.967	41934.1	92.3885	36745.6	12	cellular homeostasis;metabolic process	cytoplasm;mitochondrion	catalytic activity;nucleotide binding;protein binding	Pf00217, Pf02807	0.934	0.949	0.893	0.889	0.948	0.931	0.917	0.926	1.01	1.01	0.97	0.969	0.942	0.959	0.959	0.963	0.821	0.826	0.974	0.974	0.924	0.932	0.972	0.973	1.036	1.029	0.974	0.989	0.995
Master Protein	P59764	Dedicator of cytokinesis protein 4 OS=Mus musculus GN=Dock4 PE=1 SV=1	Dock4	238130	ENSMUSG00000035954	High	FALSE	75	639	71	0	512.616	2479.36	43.9333	9.791	12	cellular component movement;regulation of biological process;response to stimulus	cytoplasm;cytosol;membrane	enzyme regulator activity;protein binding	Pf00018, Pf06920, Pf07653, Pf14429	1.051	1.073	0.996	0.963	1.054	1.059	0.877	0.877	0.965	0.983	0.947	0.914	0.997	1.009	1.036	1.064	0.979	0.961	0.965	0.985	0.929	0.906	0.95	0.922	0.957	0.969	1.019	1.044	1.012
Master Protein	P50396	Rab GDP dissociation inhibitor alpha OS=Mus musculus GN=Gdi1 PE=1 SV=3	Gdi1	14567	ENSMUSG00000015291	High	FALSE	40	3291	33	0	511.78	11737.7	77.8523	9999	X	metabolic process;regulation of biological process;response to stimulus;transport	cytoplasm;Golgi	catalytic activity;enzyme regulator activity;protein binding	Pf00996	0.955	0.957	0.966	0.947	0.94	0.935	0.926	0.929	1.002	1.015	0.995	0.989	0.967	0.973	0.958	0.961	0.889	0.872	0.976	0.991	0.965	0.958	1.012	1.004	0.982	0.986	1.017	1.026	0.969
Master Protein	P26443	Glutamate dehydrogenase 1, mitochondrial OS=Mus musculus GN=Glud1 PE=1 SV=1	Glud1	14661	ENSMUSG00000021794	High	FALSE	50	3035	50	0	511.166	11188.5	75.8065	1894.74	14	metabolic process;regulation of biological process;response to stimulus	cytoplasm;membrane;mitochondrion;organelle lumen	catalytic activity;nucleotide binding;protein binding	Pf00208, Pf02812	0.98	0.982	0.912	0.906	0.938	0.954	0.905	0.903	0.993	0.985	0.937	0.945	0.967	0.968	0.963	0.957	0.883	0.874	0.978	0.972	0.909	0.927	0.904	0.918	0.971	0.987	0.989	0.986	0.957
Master Protein	B0V2N1-3	Isoform 3 of Receptor-type tyrosine-protein phosphatase S OS=Mus musculus GN=Ptprs	Ptprs	19280	ENSMUSG00000013236	High	FALSE	55	881	1	0	511.125	3667.61	55.7628	21.421	17	metabolic process	membrane	catalytic activity;protein binding	Pf00041, Pf00047, Pf00102, Pf07679, Pf09294, Pf13895, Pf13927, Pf14566	1.129	1.17				1.029	0.832	0.901	1.077	1.06			1.119	1.096	1.157	1.135	0.925	1.027	1.06	1.073						0.97	1.101	1.078
Master Protein	E9Q9G6	Kinesin-like protein KIF1A OS=Mus musculus GN=Kif1a PE=3 SV=1	Kif1a	16560	ENSMUSG00000014602	High	FALSE	78	818	1	0	510.948	3003.23	53.0624	14.441	1	cellular component movement;metabolic process;transport	cytoplasm;cytoskeleton	catalytic activity;motor activity;nucleotide binding;protein binding	Pf00169, Pf00225, Pf00498, Pf12423, Pf12473			1.04								1.068										1.09		1.08
Master Protein	E9Q2E4	Protein Gm15800 OS=Mus musculus GN=Gm15800 PE=1 SV=2	Gm15800	269700	ENSMUSG00000042744	High	FALSE	89	470	89	0	508.749	1797.79	26.0978	2.193	5	metabolic process	cytoplasm;nucleus	catalytic activity;protein binding	Pf00622, Pf00632	0.987	0.992	0.953	0.944	1.016	0.976	0.911	0.951	1.001	0.997	0.971	0.954	0.982	0.998	0.998	0.985	0.907	0.931	0.988	1	0.968	0.938	0.965	0.932	0.967	0.954	0.998	0.997	1.002
Master Protein	Q3UD67	Alanine--tRNA ligase, cytoplasmic OS=Mus musculus GN=Aars PE=2 SV=1	Aars	234734		High	FALSE	55	1099	3	0	507.92	4324.87	71.6942	91.367	8	metabolic process;regulation of biological process;response to stimulus	cytoplasm;cytosol;membrane	catalytic activity;metal ion binding;nucleotide binding;protein binding;RNA binding	Pf01411, Pf02272, Pf07973	0.989	0.972	0.923	0.901	0.953	0.969	0.942	0.941	1.025	1.013	0.98	0.968	0.949	0.935	0.994	0.967	0.866	0.86	1.031	1.014	0.968	0.956	0.989	0.969	0.98	0.993	1.009	0.999	0.975
Master Protein	P05214	Tubulin alpha-3 chain OS=Mus musculus GN=Tuba3a PE=1 SV=1	Tuba3b; Tuba3a	22147; 22144	ENSMUSG00000067702; ENSMUSG00000067338	High	FALSE	36	17470	1	0	507.685	79763.9	71.3333	26100.6	6	metabolic process	cytoplasm;cytoskeleton;nucleus	catalytic activity;nucleotide binding;structural molecule activity	Pf00091, Pf03953	0.978					1.03			0.845				0.932		1.032				0.804							0.924	0.899
Master Protein	E9QB01	Neural cell adhesion molecule 1 OS=Mus musculus GN=Ncam1 PE=1 SV=1	Ncam1	17967	ENSMUSG00000039542	High	FALSE	54	3421	2	0	507.512	13326	60.3774	221.3	9	cell organization and biogenesis;regulation of biological process;response to stimulus	cell surface;cytoplasm;membrane	protein binding	Pf00041, Pf00047, Pf07654, Pf07679, Pf08205, Pf13895, Pf13927	0.972	1.004	1.012	0.956	0.98	1.056	0.912	0.841	0.99	1.018	1.022	0.98	0.985	1.057	0.944	1.006	0.95	0.89	0.947	1.002	1.034	1.007	1.054	0.972	0.953	1.029	0.954	0.937	1.008
Master Protein	P23116	Eukaryotic translation initiation factor 3 subunit A OS=Mus musculus GN=Eif3a PE=1 SV=5	Eif3a	13669	ENSMUSG00000024991	High	FALSE	86	952	86	0	506.183	3269.97	50.8929	39.216	19	cell organization and biogenesis;metabolic process;regulation of biological process	cytoplasm;cytoskeleton;membrane;nucleus	protein binding;RNA binding	Pf01399	0.989	0.992	0.915	0.913	0.964	0.975	0.921	0.935	0.998	1.009	0.971	0.972	0.96	0.977	1	1.009	0.933	0.929	1.011	1.02	0.942	0.937	0.918	0.928	0.946	0.968	1	1.018	0.987
Master Protein	Q9Z2H5-2	Isoform 2 of Band 4.1-like protein 1 OS=Mus musculus GN=Epb41l1	Epb4.1l1; Epb41l1	13821		High	FALSE	56	1590	7	0	505.823	5651.96	60.669	220.898	2	cell organization and biogenesis	cytoplasm;cytoskeleton	protein binding;structural molecule activity	Pf00373, Pf04382, Pf05902, Pf08736, Pf09379, Pf09380	0.832	0.563	0.773	0.537	0.941	0.649	1.674	1.755	0.871	0.648	0.729	0.506	1.03	1.364	0.761	0.591	1.152	1.174	1.101	1.377	1.577	2.408	1.119	1.344	1.083	1.251	0.837	0.589	0.876
Master Protein	Q3TWV0	Putative uncharacterized protein OS=Mus musculus GN=Vim PE=2 SV=1	Vim	22352		High	FALSE	54	2820	2	0	505.771	10818.7	80.6867	2252.93	2	cell differentiation;cell organization and biogenesis;metabolic process;regulation of biological process;response to stimulus	cytoplasm;cytoskeleton;cytosol;membrane	protein binding;RNA binding;structural molecule activity	Pf00038, Pf04111, Pf04732, Pf05622, Pf10186	0.745	0.684	0.702	0.814	0.812	0.786	0.844	0.796	0.819	0.717	0.854	0.911	0.761	0.704	0.733	0.694	0.734	0.666	0.745	0.692	0.836	0.926	0.777	0.856	0.822	0.827	0.823	0.763	0.875
Master Protein	Q6PGK0	Cyfip2 protein OS=Mus musculus GN=Cyfip2 PE=2 SV=1	Cyfip2	76884		High	FALSE	53	1562	1	0	505.404	5813.95	60.962	84.547	11	cell death;metabolic process;regulation of biological process	cytoplasm;membrane;nucleus	protein binding	Pf05994, Pf07159	0.929	0.952	0.911	0.915	0.984	1.007	0.901	0.917	0.92	0.895	0.897	0.915	0.801	0.836	1.028	0.975	0.979	1.008	0.992	0.92	0.926	0.905	0.856	0.871	0.86	1.066	0.989	0.901	1
Master Protein	E9QPD7	Pyruvate carboxylase OS=Mus musculus GN=Pcx PE=1 SV=1	Pcx	18563	ENSMUSG00000024892	High	FALSE	57	1191	1	0	504.461	4561.37	61.9169	40.66	19	metabolic process;regulation of biological process	cytoplasm;membrane;mitochondrion	catalytic activity;DNA binding;metal ion binding;nucleotide binding	Pf00289, Pf00364, Pf00682, Pf02222, Pf02436, Pf02785, Pf02786, Pf07478, Pf08443, Pf13533, Pf13535, Pf15632	0.949	0.961	0.882	0.855	0.93	0.946	0.953	0.928	1.018	1.028	0.951	0.957	0.947	0.955	0.942	0.932	0.886	0.863	0.987	0.981	0.926	0.93	0.903	0.905	1.025	1.046	0.996	0.994	1.018
Master Protein	Q05920	Pyruvate carboxylase, mitochondrial OS=Mus musculus GN=Pc PE=1 SV=1	Pcx	18563		High	FALSE	57	1191	1	0	504.176	4559.94	61.9694	40.66	19	metabolic process;regulation of biological process	cytoplasm;membrane;mitochondrion;organelle lumen	catalytic activity;DNA binding;metal ion binding;nucleotide binding	Pf00289, Pf00364, Pf00682, Pf02222, Pf02436, Pf02785, Pf02786, Pf07478, Pf08443, Pf13533, Pf13535, Pf15632	0.911					1.067			0.806				0.989		0.676				0.981							0.685	1.083
Master Protein	Q3THQ5	Putative uncharacterized protein OS=Mus musculus GN=Stip1 PE=2 SV=1	Stip1	20867		High	FALSE	60	1489	60	0	502.362	5251.49	74.4015	999	19		cytoplasm;nucleus	protein binding;RNA binding	Pf00515, Pf13414, Pf13424, Pf13432	0.904	0.933	0.955	0.945	0.856	0.888	1.027	1.067	0.995	1.02	1.105	1.12	0.855	0.9	0.901	0.927	0.93	0.945	0.965	0.981	1.05	1.066	1.071	1.079	0.925	0.964	1.026	1.038	0.978
Master Protein	P63318	Protein kinase C gamma type OS=Mus musculus GN=Prkcg PE=1 SV=1	Prkcg	18752	ENSMUSG00000078816; ENSMUSG00000097449	High	FALSE	48	2130	45	0	501.995	8366.89	70.0143	497.511	7; CHR_MG4151_PATCH	cell communication;metabolic process;regulation of biological process;response to stimulus	cytoplasm;cytosol;membrane;nucleus	catalytic activity;metal ion binding;nucleotide binding;protein binding	Pf00069, Pf00130, Pf00168, Pf00433, Pf07714	0.926	0.905	1.068	1.039	0.915	0.893	0.972	1.008	0.907	0.878	0.996	0.977	0.876	0.859	0.927	0.907	1.027	1.066	0.877	0.84	1.018	1.001	1.013	0.986	0.872	0.861	0.948	0.912	0.95
Master Protein	Q3UAD6	Heat shock protein 90kDa beta (Grp94), member 1 OS=Mus musculus GN=Hsp90b1 PE=2 SV=1	Hsp90b1	22027	ENSMUSG00000020048	High	FALSE	60	2053	57	0	499.536	7951.22	62.5935	315.228	10	cell organization and biogenesis;metabolic process;regulation of biological process;response to stimulus;transport	cytosol;endoplasmic reticulum;extracellular;membrane;nucleus;organelle lumen	nucleotide binding;protein binding;RNA binding	Pf00183, Pf02518, Pf13589	0.953	0.943	0.852	0.853	0.92	0.918	0.953	0.979	1.05	1.058	0.997	1.002	0.914	0.924	0.963	0.946	0.84	0.835	1.048	1.059	0.993	1.005	0.929	0.935	0.961	0.967	1.001	1.007	0.954
Master Protein	Q6P9K8	Caskin-1 OS=Mus musculus GN=Caskin1 PE=1 SV=2	Caskin1	268932	ENSMUSG00000033597	High	FALSE	61	867	57	0	499.397	3718.59	53.1097	23.525	17	regulation of biological process;response to stimulus	cytoplasm	protein binding	Pf00018, Pf00023, Pf00536, Pf07647, Pf07653, Pf12796, Pf13606, Pf13637, Pf13857, Pf14604	1.034	1.023	0.97	0.955	1.002	0.991	0.932	0.961	1.067	1.043	0.966	0.948	0.966	0.969	1.022	1.004	0.95	0.959	1.061	1.039	0.965	0.95	0.952	0.929	0.999	0.982	1.041	1.022	1.048
Master Protein	Q9Z2I0	LETM1 and EF-hand domain-containing protein 1, mitochondrial OS=Mus musculus GN=Letm1 PE=2 SV=1	Letm1	56384	ENSMUSG00000005299	High	FALSE	45	1067	45	0	499.121	4828.02	56.7751	163.965	5	cell organization and biogenesis	membrane;mitochondrion	metal ion binding	Pf07766	0.998	0.949	1.01	1.013	0.943	0.928	0.92	0.941	1.007	0.975	1.004	1.018	1.036	0.984	0.978	0.944	0.927	0.928	0.985	0.949	0.998	1.017	0.975	0.999	0.954	0.943	1.021	0.989	0.999
Master Protein	Q3TG92	Putative uncharacterized protein OS=Mus musculus GN=Actc1 PE=2 SV=1	Actc1	11464		High	FALSE	37	9839	3	0	497.831	31664.4	76.6578	60618	2	cell organization and biogenesis;cellular component movement;regulation of biological process	cytoplasm;cytoskeleton;membrane	catalytic activity;nucleotide binding;protein binding	Pf00022	0.998	1.079	0.838	0.844	0.959	0.998	0.949	0.986	1.052	1.095	0.875	0.806	1.131	1.212	0.99	1.057	0.859	0.778	0.968	1.024	1.008	0.925	0.896	0.836	0.995	1.001	1.074	1.136	1.023
Master Protein	E9Q6L9	Leucine-rich repeat-containing protein 7 OS=Mus musculus GN=Lrrc7 PE=1 SV=1	Lrrc7	242274	ENSMUSG00000028176	High	FALSE	67	866	64	0	494.421	3325.92	53.6965	14.034	3	regulation of biological process	cytoplasm;cytoskeleton;membrane	protein binding	Pf00595, Pf12799, Pf13180, Pf13855	1.047	1.047	0.985	0.991	1.054	1.069	0.935	0.955	1.007	1.025	0.928	0.932	1.039	1.028	1.033	1.027	0.958	0.977	1.006	1.019	0.949	0.956	0.924	0.926	0.974	1.003	1.038	1.055	1.028
Master Protein	Q3TIJ9	Putative uncharacterized protein OS=Mus musculus GN=Actb PE=2 SV=1	Actb	11461		High	FALSE	42	11009	2	0	493.306	43632.9	86.9333	90472.6	5	cell organization and biogenesis;response to stimulus	cytoplasm;cytoskeleton;cytosol;membrane	DNA binding;nucleotide binding;protein binding	Pf00022	0.976	1.143	0.782	0.894		1.084		1.035	0.943	1.122	0.832	0.854	1.134	1.313	0.959	1.09		1.027	0.928	1.049	0.753	0.86	0.879	0.908		1.052	1.033	0.929
Master Protein	P63101	14-3-3 protein zeta/delta OS=Mus musculus GN=Ywhaz PE=1 SV=1	Ywhaz	22631	ENSMUSG00000022285	High	FALSE	40	8176	31	0	493.026	35071.8	97.551	233571	15	cell organization and biogenesis;regulation of biological process;response to stimulus;transport	cytoplasm;cytosol;membrane;mitochondrion;nucleus;vacuole	protein binding;RNA binding	Pf00244	0.964	0.95	0.981	0.958	0.96	0.963	0.931	0.975	0.973	0.959	1.024	0.989	0.954	0.951	0.96	0.953	0.909	0.936	0.997	0.983	0.973	0.963	0.987	0.974	0.988	0.998	1.045	1.03	1.041
Master Protein	Q3TZ32	Alanine--tRNA ligase, cytoplasmic OS=Mus musculus GN=Aars PE=2 SV=1	Aars	234734		High	FALSE	54	1069	2	0	492.117	4187.11	69.5248	80.996	8	metabolic process;regulation of biological process;response to stimulus	cytoplasm;cytosol;membrane	catalytic activity;metal ion binding;nucleotide binding;protein binding;RNA binding	Pf01411, Pf02272, Pf07973	1.315			0.696		1.401			1.43			1.434	0.53		0.594				0.63			1.263		1.453		1.512	0.637
Master Protein	D3YUZ8	Disks large homolog 2 OS=Mus musculus GN=Dlg2 PE=1 SV=1	Dlg2	23859	ENSMUSG00000052572	High	FALSE	50	1398	1	0	488.81	5772.07	69.9338	233.188	7	cell communication;cell organization and biogenesis;regulation of biological process	cytoplasm;membrane	catalytic activity;protein binding	Pf00018, Pf00595, Pf00625, Pf07653, Pf10600, Pf13180	0.91		0.977	1.105	1.149	1.105		1.028	1.007		0.898	0.979	1.127		0.955			0.868	0.922		0.974	1.092	0.977	0.994	1.044	1.029	1.015		1.202
Master Protein	D3Z7P3	Glutaminase kidney isoform, mitochondrial OS=Mus musculus GN=Gls PE=1 SV=1	Gls	14660	ENSMUSG00000026103	High	FALSE	43	1263	8	0	487.803	5343.84	66.9139	333.048	1	cell communication;cell organization and biogenesis;metabolic process;regulation of biological process;response to stimulus	cytoplasm;cytosol;mitochondrion;organelle lumen	catalytic activity;protein binding	Pf04960, Pf12796	0.93	0.997	1.246	1.23	1.018	1.014	1.06	1.056	0.888	0.953	0.958	0.946	0.956	1.037	0.861	0.92	0.963	0.954	0.85	0.912	1.047	1.046	1.025	1.022	0.95	0.958	0.866	0.92	1.006
Master Protein	P62259	14-3-3 protein epsilon OS=Mus musculus GN=Ywhae PE=1 SV=1	Ywhae	22627	ENSMUSG00000020849	High	FALSE	37	6573	28	0	487.545	25653.3	89.4118	1.13646e+06	11	cellular component movement;metabolic process;regulation of biological process;transport	cytoplasm;cytosol;membrane;mitochondrion	catalytic activity;protein binding;RNA binding	Pf00244	0.964	0.961	0.969	0.944	0.953	0.965	0.934	0.932	0.977	0.975	0.994	0.975	0.954	0.959	0.96	0.953	0.907	0.906	0.99	0.992	0.968	0.952	0.975	0.953	0.95	0.963	1.007	1.009	0.984
Master Protein	Q80YC2	Hsp90ab1 protein (Fragment) OS=Mus musculus GN=Hsp90ab1 PE=2 SV=1	Hsp90ab1	15516		High	FALSE	39	2809	1	0	485.563	11247.7	85.6749	199525	17	cell organization and biogenesis;metabolic process;regulation of biological process;response to stimulus	cell surface;cytoplasm;cytosol;membrane;mitochondrion	enzyme regulator activity;nucleotide binding;protein binding;RNA binding	Pf00183	0.964	1.006	0.981	1.093	0.608		1.031	1.213	0.957	0.904	1.132	1.215	1.056	1.136	1.081	0.928	0.87	1.047	0.99	0.905	1.229	1.199	1.156	1.139	0.736		0.97	0.956	0.857
Master Protein	P70168	Importin subunit beta-1 OS=Mus musculus GN=Kpnb1 PE=1 SV=2	Kpnb1	16211	ENSMUSG00000001440	High	FALSE	41	877	41	0	485.094	3730.87	64.4977	176.828	11	cell organization and biogenesis;cellular component movement;regulation of biological process;response to stimulus;transport	cytoplasm;membrane;nucleus	protein binding;RNA binding;transporter activity	Pf02985, Pf03810, Pf13513	0.941	0.955	0.964	0.966	0.967	0.935	0.965	0.955	0.944	0.963	0.998	1.015	0.894	0.932	0.927	0.959	0.957	0.94	0.966	0.98	0.957	0.968	0.963	0.968	0.933	0.927	0.961	0.991	0.994
Master Protein	Q64514-2	Isoform Short of Tripeptidyl-peptidase 2 OS=Mus musculus GN=Tpp2	Tpp2	22019	ENSMUSG00000041763	High	FALSE	63	766	63	0	482.357	3007.48	55.4844	33.217	1	metabolic process	cytoplasm;nucleus	catalytic activity	Pf00082, Pf12580, Pf13739	1.013	1.033	0.981	0.963	1.027	1.045	1.008	0.964	1.015	1.021	0.997	0.989	0.988	0.988	1.019	1.021	0.987	0.945	1.053	1.063	0.987	0.982	0.97	0.969	1.017	1.049	1.048	1.051	1.045
Master Protein	Q5H8C4	Vacuolar protein sorting-associated protein 13A OS=Mus musculus GN=Vps13a PE=2 SV=1	Vps13a	271564	ENSMUSG00000046230	High	FALSE	77	504	74	0	481.83	2004.62	32.0594	3.516	19	response to stimulus;transport			Pf06650, Pf12624	0.983	0.98	0.937	0.938	0.987	0.973	0.879	0.884	1.023	1.015	0.936	0.946	0.994	0.998	1.004	0.988	0.916	0.899	1.015	0.997	0.934	0.922	0.923	0.912	0.977	0.97	1.018	1.007	1.014
Master Protein	Q99P72	Reticulon-4 OS=Mus musculus GN=Rtn4 PE=1 SV=2	Rtn4	68585	ENSMUSG00000020458	High	FALSE	50	1055	40	0	481.391	4558.49	57.8313	79.799	11	cell organization and biogenesis;cellular component movement;regulation of biological process	cytoplasm;endoplasmic reticulum;membrane	protein binding;RNA binding	Pf02453	0.979	0.967	0.941	0.929	1.018	1.005	0.891	0.898	0.987	0.966	0.871	0.876	0.928	0.921	0.945	0.938	0.843	0.825	1.073	1.056	0.992	0.995	0.939	0.922	1.057	1.032	1.045	1.019	1.107
Master Protein	Q80Z38-2	Isoform 2 of SH3 and multiple ankyrin repeat domains protein 2 OS=Mus musculus GN=Shank2	Shank2			High	FALSE	67	644	6	0	480.732	2418.36	55.9103	23.139				protein binding	Pf00018, Pf00536, Pf00595, Pf07647, Pf07653, Pf14604	1.035	1.042	0.963	0.942	1.009	1.008	0.874	0.887	1.039	1.034	0.933	0.911	0.963	0.97	1.033	1.024	0.928	0.938	1.121	1.12	0.996	0.986	0.919	0.912	1.001	1.011	1.095	1.096	1.065
Master Protein	G3UZE9	Microtubule-associated protein 2 (Fragment) OS=Mus musculus GN=Map2 PE=4 SV=1	Map2		ENSMUSG00000015222	High	FALSE	46	1346	1	0	480.108	5193	69.7345	3161.28	1	cell organization and biogenesis		protein binding	Pf08377					1.154	1.249	0.902	1.099									1.061	1.06							1.037	1.113			1.274
Master Protein	E9QNY8	Sacsin OS=Mus musculus GN=Sacs PE=4 SV=1	Sacs	50720	ENSMUSG00000048279	High	FALSE	98	396	98	0	480.09	1438.48	25.0327	1.698	14		cytoplasm	protein binding	Pf05168	1.027	1.016	0.891	0.909	1.022	1.03	0.924	0.971	1.016	1.01	0.887	0.886	1.047	1.028	1.049	1.037	0.88	0.91	1.001	1.005	0.875	0.888	0.886	0.901	1.011	1.026	1.031	1.031	1.022
Master Protein	E9QLL2	Dynamin-3 OS=Mus musculus GN=Dnm3 PE=1 SV=1	Dnm3		ENSMUSG00000040265	High	FALSE	56	1975	27	0	479.599	6864.34	60.139	95.172	1	metabolic process		catalytic activity;nucleotide binding	Pf00169, Pf00350, Pf01031, Pf02212	0.884	0.972	0.981	0.945	0.865	0.846	0.944	0.978	0.942	1.029	1.057	1.019	0.848	0.948	0.89	0.954	0.891	0.91	0.885	0.987	1.004	0.978	1.047	1.017	0.939	0.929	0.933	1.008	0.945
Master Protein	Q9ERD7	Tubulin beta-3 chain OS=Mus musculus GN=Tubb3 PE=1 SV=1	Tubb3	22152	ENSMUSG00000062380	High	FALSE	32	11140	10	0	479.015	40363.7	69.7778	33245	8	cell differentiation;cell organization and biogenesis;cellular component movement;metabolic process	cytoplasm;cytoskeleton;nucleus	catalytic activity;nucleotide binding;protein binding;structural molecule activity	Pf00091, Pf03953, Pf10644	0.887	0.862	1	0.992	0.927	0.928	0.966	0.97	0.901	0.876	1.007	0.99	0.928	0.906	0.891	0.871	0.948	0.95	0.906	0.882	1.015	1.006	1.016	1.007	0.934	0.939	0.927	0.902	0.929
Master Protein	Q61768	Kinesin-1 heavy chain OS=Mus musculus GN=Kif5b PE=1 SV=3	Kif5b	16573	ENSMUSG00000006740	High	FALSE	67	879	48	0	478.659	3383.38	65.6282	53.247	18	cell differentiation;cell organization and biogenesis;cellular component movement;metabolic process;regulation of biological process;transport	cytoplasm;cytoskeleton;cytosol;membrane	catalytic activity;motor activity;nucleotide binding;protein binding	Pf00225, Pf01576, Pf02463, Pf03999, Pf04111, Pf04156, Pf05483, Pf05557, Pf05622, Pf06160, Pf07111, Pf07888, Pf10174, Pf12128, Pf13514, Pf14915	0.952	0.935	0.858	0.856	0.935	0.949	0.98	0.994	1.037	1.044	0.992	0.992	0.919	0.904	0.946	0.939	0.855	0.877	1.025	1.002	0.956	0.984	0.963	0.984	0.972	0.986	1.001	0.994	0.956
Master Protein	Q810U3	Neurofascin OS=Mus musculus GN=Nfasc PE=1 SV=1	Nfasc	269116	ENSMUSG00000026442	High	FALSE	51	1444	4	0	477.369	5591.64	41.371	45.416	1	cell organization and biogenesis;cellular component movement;transport	membrane	protein binding	Pf00041, Pf00047, Pf07679, Pf07686, Pf13882, Pf13895, Pf13927	1.005	0.985	1.004	1.069	0.991	1.002	0.993	0.896	1.023	0.994	1.022	1.066	1.059	1.035	1.01	0.948	0.918	0.863	1.015	0.995	0.995	1.07	1.02	1.08	1.05	1.014	1.057	1.068	1.053
Master Protein	P19246	Neurofilament heavy polypeptide OS=Mus musculus GN=Nefh PE=1 SV=3	Nefh	380684	ENSMUSG00000020396	High	FALSE	72	2438	66	0	477.144	8737	50.9174	19.383	11	cell organization and biogenesis;regulation of biological process;response to stimulus	cytoplasm;mitochondrion;nucleus	protein binding;structural molecule activity	Pf00038, Pf03157, Pf07142, Pf10186, Pf10667, Pf15449	0.901	0.876	0.834	0.834	0.872	0.862	1.113	1.13	0.954	0.93	1.006	1.011	0.785	0.771	0.847	0.823	0.814	0.804	0.96	0.936	0.884	0.892	0.841	0.849	1.032	1.033	1.048	1.025	1.016
Master Protein	E9Q828	Calcium-transporting ATPase OS=Mus musculus GN=Atp2b4 PE=1 SV=1	Atp2b4	381290	ENSMUSG00000026463	High	FALSE	57	2216	35	0	475.773	8883.1	48.4642	65.463	1	cellular component movement;cellular homeostasis;metabolic process;regulation of biological process;response to stimulus;transport	membrane	catalytic activity;enzyme regulator activity;metal ion binding;nucleotide binding;protein binding;transporter activity	Pf00122, Pf00689, Pf00690, Pf00702, Pf08282, Pf12424, Pf12710, Pf13246	0.976	0.997	0.91	0.89	0.809	0.782	0.943	0.947	1.043	1.04	1.091	1.037	0.844	0.879	0.905	0.909	0.905	0.9	1.244	1.224	1.048	1.019	1.005	0.971	1.031	1.007	1.258	1.252	1.091
Master Protein	Q9Z0E0	Neurochondrin OS=Mus musculus GN=Ncdn PE=1 SV=1	Ncdn	26562	ENSMUSG00000028833	High	FALSE	44	1526	44	0	474.054	6146.63	68.0384	265.073	4	cell organization and biogenesis;regulation of biological process	cytoplasm;cytosol;membrane;nucleus	protein binding	Pf05536	0.827	0.896	1.038	1.038	0.931	0.941	1.005	1.031	0.785	0.836	0.988	1.006	0.843	0.922	0.823	0.885	1.035	1.058	0.791	0.84	0.978	0.998	1.004	1.018	0.828	0.847	0.834	0.886	0.893
Master Protein	Q3UPA3	Putative uncharacterized protein (Fragment) OS=Mus musculus GN=Gdi2 PE=2 SV=1	Gdi2	14569		High	FALSE	45	1671	38	0	473.875	6625.31	72.6562	1332.52	13	metabolic process;regulation of biological process;response to stimulus;transport	cytoplasm;Golgi;membrane	catalytic activity;enzyme regulator activity;protein binding;RNA binding	Pf00996	0.956	0.952	0.943	0.928	0.955	0.958	0.932	0.959	1.006	1.005	1	0.987	0.933	0.948	0.992	0.987	0.885	0.895	0.999	1.004	0.992	0.98	0.995	0.984	0.97	0.983	1.013	1.008	0.974
Master Protein	Q8CHG7	Rap guanine nucleotide exchange factor 2 OS=Mus musculus GN=Rapgef2 PE=1 SV=2	Rapgef2	76089	ENSMUSG00000062232	High	FALSE	62	788	56	0	473.873	3235.85	52.5401	20.544	3	cell differentiation;cell organization and biogenesis;cellular component movement;development;regulation of biological process;response to stimulus	cytoplasm;cytosol;endosome;membrane	enzyme regulator activity;nucleotide binding;protein binding	Pf00027, Pf00595, Pf00617, Pf00618, Pf00788, Pf13180	1.043	1.059	0.968	0.942	1.05	1.054	0.932	0.935	1.01	0.993	0.952	0.929	1.029	1.045	1.024	1.038	0.943	0.925	1.03	1.023	0.948	0.928	0.943	0.925	1.024	1.026	1.042	1.035	1.058
Master Protein	Q62108-2	Isoform 2 of Disks large homolog 4 OS=Mus musculus GN=Dlg4	Dlg4	13385	ENSMUSG00000020886	High	FALSE	46	1590	40	0	473.208	6458.58	55.9322	344.511	11	cell communication;cell organization and biogenesis;cellular homeostasis;regulation of biological process;response to stimulus	cytoplasm;cytoskeleton;cytosol;endoplasmic reticulum;membrane	catalytic activity;protein binding;structural molecule activity	Pf00018, Pf00595, Pf00625, Pf07653, Pf10600, Pf10608, Pf13180	1	1.011	0.97	0.956	1.042	1.043	0.872	0.911	0.976	0.999	0.934	0.936	0.977	0.989	1.009	1.015	0.958	0.979	1.008	1.027	0.944	0.948	0.919	0.916	0.966	0.983	1.012	1.034	1.05
Master Protein	A2CG49-9	Isoform 9 of Kalirin OS=Mus musculus GN=Kalrn	Kalrn	545156	ENSMUSG00000061751	High	FALSE	78	604	1	0	472.314	2308.65	51.9347	11.205	16	cell organization and biogenesis;metabolic process;regulation of biological process;response to stimulus	cytoplasm;cytoskeleton	catalytic activity;metal ion binding;nucleotide binding;protein binding	Pf00169, Pf00435, Pf00621, Pf00650, Pf13716	1.076	1.033	1.017	0.966	1.072	1.054	0.889	0.898	1.023	0.994	0.907	0.898	1.052	1.028	1.078	1.037	1.026	0.995	1.027	0.992	0.924	0.923	0.932	0.927	0.932	0.934	1.015	0.988	1.014
Master Protein	Q80UG2	Plexin-A4 OS=Mus musculus GN=Plxna4 PE=1 SV=3	Plxna4	243743	ENSMUSG00000029765	High	FALSE	68	754	51	0	469.179	2962.78	41.5742	9.661	6	cell organization and biogenesis;cellular component movement;regulation of biological process;response to stimulus	membrane	protein binding;receptor activity;signal transducer activity	Pf01403, Pf01437, Pf01833, Pf08337	1.024	1.045	1.014	1.016	1.024	1.034	0.901	0.908	0.971	0.976	0.974	0.979	1.02	1.049	1.047	1.07	1.015	1.013	0.95	0.964	0.922	0.946	0.936	0.977	0.965	0.974	0.986	0.993	0.988
Master Protein	Q8C0T5	Signal-induced proliferation-associated 1-like protein 1 OS=Mus musculus GN=Sipa1l1 PE=1 SV=2	Sipa1l1	217692	ENSMUSG00000042700	High	FALSE	73	650	70	0	468.824	2381.52	53.1987	9.42	12	cell organization and biogenesis;regulation of biological process;response to stimulus	cytoplasm;cytoskeleton;membrane	enzyme regulator activity;protein binding	Pf00595, Pf02145, Pf11881	1.016	0.998	0.948	0.941	0.999	1.004	0.902	0.928	1.011	0.998	0.942	0.929	0.988	0.922	1.001	0.976	0.91	0.931	1.013	0.96	0.976	0.966	0.975	0.946	0.968	0.982	1.028	0.995	1.044
Master Protein	Q3U4W8	Ubiquitin carboxyl-terminal hydrolase OS=Mus musculus GN=Usp5 PE=1 SV=1	Usp5	22225	ENSMUSG00000038429	High	FALSE	42	1237	42	0	468.594	5060.89	64.7904	174.568	6	metabolic process;regulation of biological process		catalytic activity;metal ion binding;protein binding	Pf00443, Pf00627, Pf02148, Pf13423	0.98	0.978	0.941	0.944	1.002	0.989	0.965	0.97	1.024	1.023	0.987	0.974	0.999	1.005	0.994	0.993	0.902	0.907	1.024	1.025	0.965	0.949	0.963	0.943	1.015	1.01	1.049	1.049	1.021
Master Protein	A2CG49-8	Isoform 8 of Kalirin OS=Mus musculus GN=Kalrn	Kalrn	545156	ENSMUSG00000061751	High	FALSE	78	589	1	0	467.416	2253.81	52.1948	10.938	16	cell organization and biogenesis;metabolic process;regulation of biological process;response to stimulus	cytoplasm;cytoskeleton	catalytic activity;metal ion binding;nucleotide binding;protein binding	Pf00169, Pf00435, Pf00621, Pf00650, Pf13716		0.98								1.077				1.127		0.981				0.983								0.908
Master Protein	Q9QXY6	EH domain-containing protein 3 OS=Mus musculus GN=Ehd3 PE=1 SV=2	Ehd3	57440	ENSMUSG00000024065	High	FALSE	44	1240	28	0	466.731	5318.88	84.2991	1239.94	17	cell organization and biogenesis;regulation of biological process;transport	cytoplasm;endosome;membrane	metal ion binding;nucleotide binding;protein binding	Pf00350, Pf01926, Pf12763	0.957	0.95	0.882	0.88	0.922	0.923	0.914	0.92	0.947	0.943	0.96	0.958	1.038	1.036	1.003	0.99	0.855	0.843	0.966	0.962	0.906	0.902	0.878	0.882	0.961	0.966	1.057	1.052	1.056
Master Protein	Q3TU36	Putative uncharacterized protein OS=Mus musculus GN=Rap1gds1 PE=2 SV=1	Rap1gds1	229877	ENSMUSG00000028149	High	FALSE	39	1406	1	0	465.821	5752.47	74.2574	265.073	3	cell organization and biogenesis;cellular homeostasis;regulation of biological process;response to stimulus	cytosol;endoplasmic reticulum;mitochondrion	protein binding	Pf00514	0.932	0.955	0.953	0.971	0.99	0.961	1.028	1.028	0.97	0.995	0.979	1.002	0.921	0.952	0.964	0.975	0.932	0.908	0.979	0.988	1	1.006	1.009	1.012	0.968	0.977	0.985	1.011	0.991
Master Protein	Q5SWU9-2	Isoform 2 of Acetyl-CoA carboxylase 1 OS=Mus musculus GN=Acaca	Acaca	107476		High	FALSE	79	561	79	0	465.548	2200.1	38.5648	5.078	11	cell organization and biogenesis;metabolic process;response to stimulus	cytoplasm;cytoskeleton;cytosol;mitochondrion	catalytic activity;metal ion binding;nucleotide binding;protein binding	Pf00289, Pf00364, Pf01039, Pf02222, Pf02655, Pf02785, Pf02786, Pf07478, Pf08326, Pf13535, Pf15632	0.984	0.95	0.886	0.863	0.955	0.946	0.931	0.921	1.026	0.978	0.987	0.977	0.993	0.963	0.99	0.944	0.859	0.859	1.008	0.963	0.964	0.956	0.95	0.924	0.942	0.963	1.029	0.994	0.971
Master Protein	Q3UL48	Putative uncharacterized protein OS=Mus musculus GN=Ezr PE=2 SV=1	Ezr	22350		High	FALSE	58	1205	45	0	465.354	4413.23	67.9181	1265.38	17	cell organization and biogenesis;metabolic process;regulation of biological process;response to stimulus;transport	cytoplasm;cytoskeleton;cytosol;endosome;membrane	protein binding;RNA binding	Pf00373, Pf00769, Pf09379, Pf09380	0.889	0.91	0.807	0.793	0.843	0.853	0.922	0.925	0.927	0.95	0.974	0.961	0.874	0.89	0.836	0.849	0.783	0.788	0.97	0.996	0.973	0.954	0.92	0.907	0.898	0.917	0.888	0.916	0.858
Master Protein	E9QN14	SLIT-ROBO Rho GTPase-activating protein 3 OS=Mus musculus GN=Srgap3 PE=1 SV=1	Srgap3	259302	ENSMUSG00000030257	High	FALSE	65	767	2	0	464.928	2790.19	59.814	45.416	6	regulation of biological process;response to stimulus	cytoplasm	enzyme regulator activity;protein binding	Pf00018, Pf00611, Pf00620, Pf07653, Pf14604	1.028	1.03	0.975	0.948	1.014	1.027	0.887	0.916	1.003	0.99	0.951	0.945	1.013	1.005	1.026	1.035	0.954	0.947	0.984	0.989	0.951	0.945	0.938	0.934	0.943	0.962	1.002	1.007	0.998
Master Protein	Q3TA69	Putative uncharacterized protein OS=Mus musculus GN=Rap1gds1 PE=2 SV=1	Rap1gds1	229877		High	FALSE	39	1365	1	0	464.336	5655.18	74.2998	250.189	3	cell organization and biogenesis;cellular homeostasis;regulation of biological process;response to stimulus	cytosol;endoplasmic reticulum;mitochondrion	protein binding	Pf00514	1.165	1.113	1.209	1.064	0.829	0.676	0.928	1.055	1.224	1.145	1.28	1.126	1.172	1.129	0.962	0.975	0.806	0.627	0.996	1.008	1.004	0.968	1.024	0.991	1.162	1.349	1.271	1.142	1.21
Master Protein	Q3TXZ6	cGMP-dependent 3',5'-cyclic phosphodiesterase OS=Mus musculus GN=Pde2a PE=2 SV=1	Pde2a	207728	ENSMUSG00000030653	High	FALSE	49	1112	4	0	463.849	4603.21	70.0745	55.234	7	cell differentiation;metabolic process;regulation of biological process;response to stimulus;transport	cytoplasm;cytosol;endoplasmic reticulum;Golgi;membrane;nucleus;organelle lumen	catalytic activity;metal ion binding;nucleotide binding;protein binding	Pf00233, Pf01590, Pf13185, Pf13492	0.961	0.949	0.987	0.941	0.95	0.919	0.972	0.961	0.956	0.939	1.045	1.013	0.979	0.955	0.953	0.939	0.965	0.953	1.019	1.011	1.07	1.037	0.997	0.959	0.948	0.932	1.061	1.048	1.018
Master Protein	F8VPN4	Protein Agl OS=Mus musculus GN=Agl PE=4 SV=1	Agl	77559	ENSMUSG00000033400	High	FALSE	68	653	68	0	463.02	2614.92	51.436	11.915	3	metabolic process;response to stimulus	cytoplasm;endoplasmic reticulum;nucleus	catalytic activity;protein binding	Pf00128, Pf06202, Pf14699, Pf14701, Pf14702	0.951	0.972	0.853	0.886	0.99	0.932	0.939	0.917	0.985	0.983	0.955	0.971	0.904	0.926	0.937	0.951	0.85	0.886	1.008	1.005	0.98	0.994	0.942	0.96	0.979	0.983	1	1.002	1.013
Master Protein	Q9QYC0	Alpha-adducin OS=Mus musculus GN=Add1 PE=1 SV=2	Add1	11518	ENSMUSG00000029106	High	FALSE	41	1674	2	0	462.486	6247.61	62.449	589.784	5	cell differentiation;cell organization and biogenesis;cellular homeostasis;metabolic process;regulation of biological process;response to stimulus	cytoplasm;cytoskeleton;membrane;nucleus	protein binding;RNA binding;structural molecule activity	Pf00596	0.963	0.954	0.982	0.969	0.95	0.962	0.917	0.929	0.97	0.967	0.951	0.958	0.949	0.949	0.965	0.963	0.901	0.913	0.986	0.975	0.952	0.961	0.958	0.966	0.935	0.951	1.011	1.003	1.002
Master Protein	Q76MZ3	Serine/threonine-protein phosphatase 2A 65 kDa regulatory subunit A alpha isoform OS=Mus musculus GN=Ppp2r1a PE=1 SV=3	Ppp2r1a	51792	ENSMUSG00000007564	High	FALSE	41	1753	39	0	462.316	6813.16	75.7216	365.524	17	cell organization and biogenesis;metabolic process;regulation of biological process	chromosome;cytoplasm;cytosol	catalytic activity;enzyme regulator activity;protein binding	Pf02985, Pf13513, Pf13646	0.938	0.912	1.002	0.985	0.926	0.898	0.957	0.947	0.931	0.909	1.005	1	0.93	0.905	0.953	0.921	0.959	0.946	0.947	0.922	0.948	0.944	0.975	0.977	0.93	0.911	0.978	0.952	0.951
Master Protein	P68134	Actin, alpha skeletal muscle OS=Mus musculus GN=Acta1 PE=1 SV=1	Acta1	11459	ENSMUSG00000031972	High	FALSE	39	10114	2	0	462.062	32238.8	70.557	54843.2	8	cell growth;cell organization and biogenesis;regulation of biological process;response to stimulus	cytoplasm;cytoskeleton	nucleotide binding;protein binding	Pf00022	0.794	0.896	1.003	0.983	0.675	0.728	0.917	0.877	0.884	0.987	0.893	0.926	0.831	0.923	0.776	0.861	1.041	1.024	0.74	0.815	0.987	0.979	0.824	0.884	0.731	0.766	0.989	1.095	0.799
Master Protein	Q6ZQ54	MKIAA0756 protein (Fragment) OS=Mus musculus GN=Nfasc PE=2 SV=1	Nfasc	269116		High	FALSE	55	1433	8	0	461.686	5380.19	42.526	26.067	1	cell organization and biogenesis;cellular component movement;transport	membrane	protein binding	Pf00041, Pf00047, Pf07679, Pf07686, Pf13882, Pf13895, Pf13927	0.887	0.911	0.946	0.96	0.898	0.878	0.929	0.938	0.896	0.917	0.954	0.974	0.855	0.88	0.887	0.907	0.911	0.913	0.911	0.929	0.941	0.963	0.952	0.966	0.959	0.952	0.973	0.989	0.983
Master Protein	F8VPQ4	SLIT-ROBO Rho GTPase-activating protein 3 OS=Mus musculus GN=Srgap3 PE=1 SV=1	Srgap3	259302	ENSMUSG00000030257	High	FALSE	64	760	1	0	461.653	2759.58	57.6888	39.081	6	regulation of biological process;response to stimulus	cytoplasm	enzyme regulator activity;protein binding	Pf00018, Pf00611, Pf00620, Pf07653, Pf14604		0.977		0.816			1.028	0.84		0.976		0.87		0.986		0.912	1.026	0.836		0.951		0.911		0.849				1.027
Master Protein	Q8BKC5	Importin-5 OS=Mus musculus GN=Ipo5 PE=1 SV=3	Ipo5	70572	ENSMUSG00000030662	High	FALSE	51	598	50	0	461.448	2326.78	61.8961	43.668	14	cell organization and biogenesis;regulation of biological process;response to stimulus;transport	cytoplasm;Golgi;membrane;nucleus	protein binding;RNA binding;transporter activity	Pf02985, Pf12755, Pf13513, Pf13646	0.945	0.963	0.933	0.934	0.936	0.96	0.98	0.955	0.989	1	0.999	1.007	0.963	0.964	0.947	0.974	0.917	0.901	0.987	1.01	1	0.991	0.981	0.983	0.938	0.978	0.995	1.001	0.957
Master Protein	Q9DBJ1	Phosphoglycerate mutase 1 OS=Mus musculus GN=Pgam1 PE=1 SV=3	Pgam1	18648	ENSMUSG00000011752	High	FALSE	29	3466	23	0	461.361	14547.8	90.5512	1.16591e+06	19	metabolic process;regulation of biological process	cytoplasm;cytosol;membrane;nucleus	catalytic activity;protein binding	Pf00300	0.9	0.909	0.949	0.952	0.91	0.917	1.008	1.025	0.95	0.963	1.015	1.026	0.887	0.891	0.91	0.923	0.891	0.898	0.905	0.912	0.994	1.016	1.012	1.032	0.955	0.973	0.971	0.972	1.006
Master Protein	Q8K2B3	Succinate dehydrogenase [ubiquinone] flavoprotein subunit, mitochondrial OS=Mus musculus GN=Sdha PE=1 SV=1	Sdha	66945	ENSMUSG00000021577	High	FALSE	38	1534	38	0	459.112	6513.48	76.2048	262.665	13	metabolic process;transport	membrane;mitochondrion	catalytic activity;nucleotide binding	Pf00890, Pf02910	0.953	0.92	1.022	0.999	0.989	0.944	0.993	0.981	0.952	0.912	1.028	1	0.901	0.867	0.92	0.89	0.989	0.966	0.932	0.901	0.987	0.967	0.973	0.959	0.986	0.947	0.957	0.922	1.021
Master Protein	Q9QZQ1-2	Isoform 1 of Afadin OS=Mus musculus GN=Mllt4	Mllt4		ENSMUSG00000068036	High	FALSE	72	588	4	0	458.871	2206.96	46.3712	9.89	17	regulation of biological process;response to stimulus		protein binding	Pf00498, Pf00595, Pf00788, Pf01843	1.015	1.01	0.914	0.915	0.993	0.995	0.89	0.901	1.039	1.019	0.937	0.942	0.988	0.968	1.006	0.994	0.882	0.87	1.063	1.06	0.966	0.963	0.904	0.915	0.995	0.988	1.075	1.068	1.049
Master Protein	P61264	Syntaxin-1B OS=Mus musculus GN=Stx1b PE=1 SV=1	Stx1b	56216	ENSMUSG00000030806	High	FALSE	39	2530	35	0	458.144	10415	75	70793.6	7	cell organization and biogenesis;regulation of biological process;transport	membrane	protein binding	Pf00804, Pf05739, Pf13166, Pf14523	1.015	1.027	0.958	0.941	0.964	0.978	0.97	0.976	1.069	1.087	0.978	0.972	1.004	1.018	1.011	1.023	0.913	0.904	1.039	1.055	0.967	0.959	0.955	0.962	1.085	1.106	1.081	1.1	1.052
Master Protein	Q3V1M8	Putative uncharacterized protein OS=Mus musculus GN=Hdlbp PE=2 SV=1	Hdlbp	110611		High	FALSE	64	722	64	0	457.692	2649.35	52.918	23.139	1	metabolic process;transport	cytoplasm;membrane;nucleus	RNA binding	Pf00013, Pf13014, Pf14611	0.977	0.985	0.927	0.894	0.931	0.943	0.989	0.949	1.045	1.052	0.979	0.94	0.958	0.989	0.978	0.987	0.91	0.894	1.022	1.028	0.974	0.946	0.938	0.911	0.956	0.965	1.027	1.033	0.987
Master Protein	Q9Z1G3	V-type proton ATPase subunit C 1 OS=Mus musculus GN=Atp6v1c1 PE=1 SV=4	Atp6v1c1	66335	ENSMUSG00000022295	High	FALSE	45	1885	45	0	457.559	7130	85.6021	3289.34	15	transport	cytoplasm;membrane	catalytic activity;transporter activity	Pf03223	0.959	0.95	0.976	0.969	0.992	0.975	0.912	0.909	0.932	0.923	0.946	0.948	0.941	0.941	0.959	0.95	0.93	0.921	0.893	0.883	0.935	0.935	0.934	0.94	0.971	0.977	0.967	0.966	1.019
Master Protein	Q05793	Basement membrane-specific heparan sulfate proteoglycan core protein OS=Mus musculus GN=Hspg2 PE=1 SV=1	Hspg2	15530		High	FALSE	67	606	2	0	456.354	2329.37	23.6579	3.003	4	cell differentiation;cell organization and biogenesis;metabolic process	extracellular;organelle lumen	metal ion binding;protein binding	Pf00008, Pf00047, Pf00052, Pf00053, Pf00054, Pf00057, Pf02210, Pf07679, Pf07686, Pf12785, Pf13385, Pf13895, Pf13927	0.846	0.75	0.96	0.956	0.757	0.923	1.054	1.167	1.182	1.288	1.01	0.957	1.099	1.103	0.854	0.73	0.873	0.916	1.08	1.227	1.052	1.12	0.772	0.703	1.061	0.879	1.266	1.402	1.061
Master Protein	B2RY79	Dock9 protein OS=Mus musculus GN=Dock9 PE=2 SV=1	Dock9	105445		High	FALSE	71	513	2	0	454.255	1884.49	43.1487	6.694	14	regulation of biological process;response to stimulus	membrane	protein binding	Pf00169, Pf06920, Pf11878, Pf14429	0.972	0.972	0.916	0.928	0.973	0.947	0.947	0.973	1.006	1.032	0.967	0.997	0.975	0.972	0.953	0.974	0.893	0.929	0.991	0.992	0.94	0.964	0.924	0.949	0.938	0.92	0.951	0.971	0.951
Master Protein	F8VPN7	Dedicator of cytokinesis protein 9 OS=Mus musculus GN=Dock9 PE=4 SV=1	Dock9	105445	ENSMUSG00000025558	High	FALSE	70	512	1	0	454.149	1883.88	41.7416	6.197	14	regulation of biological process;response to stimulus	membrane	protein binding	Pf00169, Pf06920, Pf11878, Pf14429		1.076								0.976				1.051		0.987				1.034								1.053
Master Protein	Q80Z38-3	Isoform 3 of SH3 and multiple ankyrin repeat domains protein 2 OS=Mus musculus GN=Shank2	Shank2		ENSMUSG00000037541	High	FALSE	60	613	1	0	452.77	2316.74	59.5087	35.912	7			protein binding	Pf00536, Pf00595, Pf07647			1.058	1.255			1.365				1.121	1.097					1.274				1.171	1.382	1.222	1.39
Master Protein	Q8BIK4-2	Isoform 2 of Dedicator of cytokinesis protein 9 OS=Mus musculus GN=Dock9	Dock9			High	FALSE	70	512	1	0	451.85	1882.66	41.7293	5.978					Pf00169, Pf06920, Pf11878, Pf14429		0.883								1.005				0.946		0.865				0.908								0.987
Master Protein	Q6A0F1	MKIAA0002 protein (Fragment) OS=Mus musculus GN=Cct8 PE=2 SV=1	Cct8	12469		High	FALSE	45	1560	1	0	451.195	5626.68	79.6396	289.68	16	cell organization and biogenesis;metabolic process;regulation of biological process;transport	cytoplasm;cytoskeleton;cytosol	nucleotide binding;protein binding	Pf00118	0.984	0.981	0.933	0.913	0.941	0.929	0.932	0.939	0.996	0.998	0.981	0.97	0.916	0.927	0.995	0.993	0.906	0.905	0.975	0.974	0.951	0.949	0.956	0.953	0.973	0.976	1.004	1.003	0.991
Master Protein	E9Q1K3	Alpha-adducin OS=Mus musculus GN=Add1 PE=1 SV=1	Add1	11518	ENSMUSG00000029106	High	FALSE	41	1622	3	0	451.178	6023.45	71.3636	516.947	5	cell differentiation;cell organization and biogenesis;cellular homeostasis;metabolic process;regulation of biological process;response to stimulus	cytoplasm;cytoskeleton;membrane;nucleus	protein binding;RNA binding;structural molecule activity	Pf00596	1.09	1.114	1.006	1.046	0.992	1.052	0.864	1.004	1.07	1.054	0.899	0.929	0.949	0.899	1.052	1.002	1.033	1.006	1.156	1.192	0.923	0.901	0.916	0.894	0.972	1.079	1.124	1.177	1.108
Master Protein	Q9JI91	Alpha-actinin-2 OS=Mus musculus GN=Actn2 PE=1 SV=2	Actn2	11472	ENSMUSG00000052374	High	FALSE	55	1035	37	0	451.1	3934.98	69.7987	45.416	13	cell organization and biogenesis;regulation of biological process;response to stimulus	cytoplasm;cytoskeleton;membrane	metal ion binding;protein binding	Pf00307, Pf00435, Pf08726, Pf11971, Pf13499, Pf13833	1.066	1.048	0.97	0.97	1.017	1.027	0.84	0.839	0.917	0.898	0.897	0.883	0.941	0.902	1.047	1.041	0.953	0.956	1.016	0.989	0.877	0.854	0.912	0.91	0.983	0.984	1.009	0.986	1.017
Master Protein	J3QP81	CLIP-associating protein 1 OS=Mus musculus GN=Clasp1 PE=1 SV=1	Clasp1		ENSMUSG00000064302	High	FALSE	73	651	1	0	450.826	2449.48	55.0377	11.649	1			protein binding	Pf02985, Pf12348				0.938		0.87	1.004	0.933				1.079					0.829	0.808				1.087		0.96		0.963
Master Protein	E9QNN1	ATP-dependent RNA helicase A OS=Mus musculus GN=Dhx9 PE=1 SV=1	Dhx9	13211	ENSMUSG00000042699	High	FALSE	54	891	54	0	450.281	3670.54	47.8324	17.988	1	cell differentiation;metabolic process;regulation of biological process;response to stimulus	cytoplasm;membrane;nucleus	catalytic activity;DNA binding;nucleotide binding;protein binding;RNA binding	Pf00035, Pf00270, Pf00271, Pf04408, Pf07717	0.986	0.977	0.937	0.925	0.967	0.993	0.89	0.886	1.006	0.959	0.97	0.964	1.005	0.977	0.99	0.96	0.908	0.906	0.985	0.953	0.941	0.936	0.95	0.945	0.931	0.975	0.997	0.962	0.957
Master Protein	E9Q6Q4	Protein Rap1gds1 OS=Mus musculus GN=Rap1gds1 PE=4 SV=1	Rap1gds1	229877	ENSMUSG00000028149	High	FALSE	37	1414	1	0	450.001	5805.06	79.0323	325.222	3	cell organization and biogenesis;cellular homeostasis;regulation of biological process;response to stimulus	cytosol;endoplasmic reticulum;mitochondrion	protein binding	Pf00514			0.663	1.067			1.47				0.793	1.175					1.322				0.724	1.13	0.849	1.185
Master Protein	Q80TV8-2	Isoform 2 of CLIP-associating protein 1 OS=Mus musculus GN=Clasp1	Clasp1			High	FALSE	73	650	0	0	448.953	2435.48	52.9836	10.435				protein binding	Pf02985, Pf12348	0.957	0.964	0.973	0.885	0.94	0.938	0.848	0.994	1.023	1.025	0.99	0.932	1.113	1.13	0.921	0.916	0.703	0.753	1.01	0.986	1.086	1.063	1.067	0.962	1.122	1.056	0.992	1.02	1.054
Master Protein	E9Q0J5	Kinesin-like protein KIF21A OS=Mus musculus GN=Kif21a PE=1 SV=2	Kif21a		ENSMUSG00000022629	High	FALSE	62	758	56	0	448.658	2940.43	47.5478	16.546	15	cell organization and biogenesis;cellular component movement;metabolic process	cytoplasm	catalytic activity;motor activity;nucleotide binding;protein binding	Pf00225, Pf00400, Pf00769, Pf01576, Pf02050, Pf02841, Pf04111, Pf05483, Pf10174, Pf11600, Pf12128, Pf13863, Pf13868, Pf15619	0.964	0.96	0.937	0.936	0.985	0.978	0.996	0.991	1.06	1.046	0.987	1.006	0.959	0.949	0.997	0.977	0.943	0.938	1.015	1.002	1.004	1.009	0.991	1	0.99	0.987	1.039	1.026	1.002
Master Protein	F8WGR0	Alpha-adducin OS=Mus musculus GN=Add1 PE=1 SV=1	Add1	11518	ENSMUSG00000029106	High	FALSE	40	1639	1	0	447.816	6111.11	68.9291	483.969	5	cell differentiation;cell organization and biogenesis;cellular homeostasis;metabolic process;regulation of biological process;response to stimulus	cytoplasm;cytoskeleton;membrane;nucleus	protein binding;RNA binding;structural molecule activity	Pf00596			1.125								1.125										1.31		1.425
Master Protein	Q80Y09	Pdcd6ip protein OS=Mus musculus GN=Pdcd6ip PE=2 SV=1	Pdcd6ip	18571		High	FALSE	56	863	1	0	446.686	3392.54	70.1835	103.44	9	cell death;cell division;cell organization and biogenesis;regulation of biological process;transport	cytoplasm;cytoskeleton;cytosol;membrane	protein binding	Pf03097, Pf08391, Pf13949	0.986	0.973	0.919	0.908	0.976	0.98	0.954	0.981	1.028	1.019	1	1.001	0.952	0.941	0.985	0.966	0.893	0.934	1.012	0.994	0.959	0.965	0.959	0.961	1.001	1.011	1.042	1.023	1.003
Master Protein	E9QNY9	CLIP-associating protein 1 OS=Mus musculus GN=Clasp1 PE=1 SV=2	Clasp1		ENSMUSG00000064302	High	FALSE	74	620	0	0	446.144	2193.37	52.6868	10.435	1			protein binding	Pf02985, Pf12348	0.965			0.872	0.973	1.17			1.018			0.979	0.949		0.97				1.05			0.867		1	0.875	1.031	1.069		0.915
Master Protein	E9QKH0	CLIP-associating protein 1 OS=Mus musculus GN=Clasp1 PE=1 SV=1	Clasp1	76707	ENSMUSG00000064302	High	FALSE	74	622	1	0	444.596	2214.71	52.4089	9.926	1	cell division;cell organization and biogenesis;regulation of biological process	chromosome;cytoplasm;cytoskeleton;Golgi;membrane	protein binding	Pf02985, Pf12348	0.972	0.97	0.943	0.9	0.967	0.964	0.975	0.957	1.004	1.001	0.975	0.942	0.93	0.927	0.982	0.968	0.915	0.91	1.02	1.011	0.96	0.933	0.951	0.917	0.986	0.977	1.001	0.994	0.991
Master Protein	Q5SVI1	Calcium/calmodulin-dependent protein kinase type II subunit beta OS=Mus musculus GN=Camk2b PE=1 SV=1	Camk2b	12323	ENSMUSG00000057897	High	FALSE	37	3240	1	0	444.457	12984.9	68.4211	999	11	cell differentiation;cell organization and biogenesis;metabolic process;regulation of biological process;response to stimulus;transport	cytoplasm;cytoskeleton;cytosol;endoplasmic reticulum;membrane	catalytic activity;nucleotide binding;protein binding	Pf00069, Pf07714, Pf08332, Pf12680, Pf13474, Pf14534			0.92	0.97	0.976	1.001		0.915			0.905	0.861						0.87			0.875	0.918	0.994	0.931	0.951	0.9			0.921
Master Protein	P05202	Aspartate aminotransferase, mitochondrial OS=Mus musculus GN=Got2 PE=1 SV=1	Got2	14719	ENSMUSG00000031672	High	FALSE	41	3680	41	0	443.611	13542.9	83.9535	2211.22	8	metabolic process;response to stimulus;transport	cell surface;membrane;mitochondrion;organelle lumen	catalytic activity;protein binding;RNA binding	Pf00155	0.929	0.931	1.016	1.015	0.914	0.908	0.991	0.978	0.935	0.925	1.009	1.023	0.899	0.901	0.927	0.922	0.988	0.965	0.89	0.887	0.983	1.003	0.969	0.992	0.925	0.917	0.944	0.938	0.972
Master Protein	Q9WU78-3	Isoform 3 of Programmed cell death 6-interacting protein OS=Mus musculus GN=Pdcd6ip	Pdcd6ip	18571	ENSMUSG00000032504	High	FALSE	56	852	1	0	443.591	3356.75	70.595	99	9	cell death;cell division;cell organization and biogenesis;regulation of biological process;transport	cytoplasm;cytoskeleton;cytosol;membrane	protein binding	Pf03097, Pf08391, Pf13949	1.052		0.929		1.017	1.016	0.932	0.91	1.091		0.937		1.205		1.037		0.935	0.91	1.036		0.92		0.871		0.981	1.045	1.077		0.996
Master Protein	Q6ZWR6-5	Isoform 5 of Nesprin-1 OS=Mus musculus GN=Syne1	Syne1	64009	ENSMUSG00000096054	High	FALSE	66	510	1	0	442.658	2065.04	54.2278	11.879	10	cell differentiation;cell organization and biogenesis;regulation of biological process	cytoplasm;cytoskeleton;Golgi;membrane;nucleus	protein binding;RNA binding	Pf00307	1.048	1.035	1.117	1.055	1.092	1.229	0.791	0.835	1.002	1.019	1.04	1.017	1.256	1.291	1.053	1.024	0.868	0.843	0.937	0.942	1.105	0.918	1.125	0.956	1.059	1.154	1.013	0.982	1.046
Master Protein	B1AWN6	Sodium channel protein OS=Mus musculus GN=Scn2a1 PE=3 SV=1	Scn2a1	110876	ENSMUSG00000075318	High	FALSE	53	730	30	0	442.556	2713.11	26.67	15.477	2	cell death;regulation of biological process;response to stimulus;transport	membrane	metal ion binding;protein binding;transporter activity	Pf00520, Pf06512, Pf11933	0.948	0.947	1.037	1.021	0.97	0.979	0.9	0.921	0.964	0.941	1.004	1.011	1.002	1.001	0.963	0.957	0.903	0.944	0.938	0.915	0.985	0.984	0.976	0.967	0.97	0.994	1.007	1.009	1.019
Master Protein	O08532-5	Isoform 2E of Voltage-dependent calcium channel subunit alpha-2/delta-1 OS=Mus musculus GN=Cacna2d1	Cacna2d1	12293	ENSMUSG00000040118	High	FALSE	49	974	2	0	442.328	3531.66	48.3043	51.079	5	regulation of biological process;transport	endoplasmic reticulum;membrane	metal ion binding;protein binding;transporter activity	Pf00092, Pf02743, Pf08399, Pf08473, Pf13519, Pf13768	1.016	1.004	1.002	0.968	0.985	1.01	0.911	0.91	1.007	0.969	0.964	0.947	0.969	0.936	1.02	0.999	0.998	0.998	1.037	1.001	0.952	0.934	0.952	0.937	0.962	0.996	1.067	1.028	1.023
Master Protein	Q3UKQ2	Putative uncharacterized protein OS=Mus musculus GN=Cct8 PE=2 SV=1	Cct8	12469		High	FALSE	45	1526	1	0	441.692	5501.77	80.6569	297.538	16	cell organization and biogenesis;metabolic process;regulation of biological process;transport	cytoplasm;cytoskeleton;cytosol	nucleotide binding;protein binding	Pf00118	0.995	0.989			0.845	0.899	0.748	0.725	1.04	0.97			0.967	0.955	1.146	1.027	0.768	0.824	0.959	0.929					0.923	0.841	0.994	0.979	0.957
Master Protein	Q3U4U6	T-complex protein 1 subunit gamma OS=Mus musculus GN=Cct3 PE=2 SV=1	Cct3	12462	ENSMUSG00000001416	High	FALSE	48	1411	10	0	441.543	5048.72	83.3028	365.524	3	cell organization and biogenesis;metabolic process;regulation of biological process;transport	cytoplasm;membrane	nucleotide binding;protein binding;RNA binding	Pf00118	0.969	0.982	0.944	0.917	0.932	0.908	0.959	0.969	0.998	1.006	0.988	0.954	0.944	0.952	0.984	0.986	0.908	0.922	0.967	0.977	0.954	0.932	0.96	0.94	0.959	0.958	0.997	1.009	0.964
Master Protein	P18872	Guanine nucleotide-binding protein G(o) subunit alpha OS=Mus musculus GN=Gnao1 PE=1 SV=3	Gnao1	14681	ENSMUSG00000031748	High	FALSE	38	4119	10	0	441.342	14107.7	88.9831	63094.7	8	cell organization and biogenesis;metabolic process;regulation of biological process;response to stimulus	membrane	catalytic activity;metal ion binding;nucleotide binding;protein binding;signal transducer activity	Pf00025, Pf00503	0.975	0.96	0.97	0.968	0.947	0.941	0.885	0.897	0.996	0.977	0.937	0.937	0.95	0.939	0.996	0.987	0.94	0.946	1.002	0.993	0.922	0.931	0.899	0.91	0.955	0.956	1.031	1.013	0.978
Master Protein	Q99J49	Tubb2a protein (Fragment) OS=Mus musculus GN=Tubb2a PE=2 SV=1	Tubb2a	22151		High	FALSE	27	12507	1	0	438.381	41309.7	78.8591	666084	13	metabolic process	cytoplasm;cytoskeleton;nucleus	catalytic activity;nucleotide binding;structural molecule activity	Pf00091, Pf03953	0.818	0.972	0.865		0.893		0.895	0.829	0.805	1.054	0.873		0.711	0.905	0.889	1.086	0.96	0.883	0.842	1.013	0.894		0.914		0.853		0.872	1.032	0.94
Master Protein	Q3TY98	Putative uncharacterized protein OS=Mus musculus GN=Atp6v0a1 PE=2 SV=1	Atp6v0a1	11975		High	FALSE	35	2271	2	0	435.986	9008.37	40.1797	315.228	11	cell organization and biogenesis;cellular homeostasis;metabolic process;transport	cytoplasm;Golgi;membrane	catalytic activity;protein binding;transporter activity	Pf01496		0.933		0.868		0.84		0.662		1.009		0.775		1.219		0.896		0.588		0.843		0.925		1.039		1.003		0.98
Master Protein	E9Q3L1	Unconventional myosin-VI OS=Mus musculus GN=Myo6 PE=4 SV=1	Myo6	17920	ENSMUSG00000033577	High	FALSE	72	681	1	0	435.229	2532.85	56.4184	20.752	9	cell communication;cell differentiation;cell organization and biogenesis;metabolic process;regulation of biological process;response to stimulus;transport	cytoplasm;Golgi;membrane;nucleus	catalytic activity;motor activity;nucleotide binding;protein binding	Pf00063	0.984	0.788	1.279	1.409	0.783	0.762			1.031	0.889	1.19	1.362	1.147	0.881	1.012	0.872			1.044	0.907	1.155	1.595	1.219	1.268	0.913	0.784	0.955	0.851	0.905
Master Protein	Q9JLM8	Serine/threonine-protein kinase DCLK1 OS=Mus musculus GN=Dclk1 PE=1 SV=1	Dclk1	13175	ENSMUSG00000027797	High	FALSE	43	1044	25	0	434.804	4321.89	70.3704	152.478	3	cell differentiation;cell growth;cell organization and biogenesis;cellular component movement;development;metabolic process;regulation of biological process;response to stimulus		catalytic activity;nucleotide binding	Pf00069, Pf03607, Pf07714, Pf14531	1.021	1.028	0.949	0.963	1.017	0.995	0.92	0.918	1.03	1.027	0.963	0.979	0.985	0.982	1.022	1.022	0.928	0.921	1.057	1.064	0.956	0.966	0.935	0.96	0.985	0.974	1.058	1.05	1.03
Master Protein	E9Q175	Unconventional myosin-VI OS=Mus musculus GN=Myo6 PE=4 SV=1	Myo6	17920	ENSMUSG00000033577	High	FALSE	72	688	1	0	434.802	2556.75	56.1053	20.752	9	cell communication;cell differentiation;cell organization and biogenesis;metabolic process;regulation of biological process;response to stimulus;transport	cytoplasm;Golgi;membrane;nucleus	catalytic activity;motor activity;nucleotide binding;protein binding	Pf00063	0.916	0.886	0.875	0.85	0.89	0.895	0.864	0.87	0.964	0.961	0.942	0.947	0.893	0.874	0.928	0.901	0.838	0.822	0.986	0.967	0.923	0.924	0.928	0.919	0.92	0.922	0.967	0.943	0.946
Master Protein	A2AVJ7	Ribosome-binding protein 1 OS=Mus musculus GN=Rrbp1 PE=1 SV=1	Rrbp1	81910	ENSMUSG00000027422	High	FALSE	81	550	36	0	434.555	1933.12	66.8033	7.227	2	cell differentiation;metabolic process;regulation of biological process;transport	endoplasmic reticulum;membrane;ribosome	protein binding;receptor activity;RNA binding;structural molecule activity	Pf00038, Pf03276, Pf03962, Pf04111, Pf04156, Pf05104, Pf08317, Pf09606, Pf09726, Pf10186, Pf12128, Pf13779	0.89	0.866	0.839	0.829	0.871	0.856	1.088	1.068	1.028	0.996	1.017	1	0.818	0.8	0.886	0.855	0.842	0.844	1.049	1.032	1.09	1.09	0.966	0.961	0.89	0.897	0.967	0.945	0.914
Master Protein	P28663	Beta-soluble NSF attachment protein OS=Mus musculus GN=Napb PE=1 SV=2	Napb	17957	ENSMUSG00000027438	High	FALSE	34	2602	30	0	433.364	9769.76	87.5839	11102.4	2	cell communication;cell organization and biogenesis;regulation of biological process;transport	membrane	protein binding	Pf14938	0.907	0.926	1.003	1.004	0.921	0.924	0.935	0.928	0.936	0.936	0.993	1.01	0.903	0.939	0.927	0.934	0.929	0.907	0.908	0.906	0.99	1.004	0.979	0.999	0.935	0.94	0.965	0.97	0.988
Master Protein	Q5SSL4	Active breakpoint cluster region-related protein OS=Mus musculus GN=Abr PE=1 SV=1	Abr	109934	ENSMUSG00000017631	High	FALSE	48	731	45	0	432.206	2955.43	67.8696	86.333	11	cell organization and biogenesis;regulation of biological process;response to stimulus	cytosol;membrane	enzyme regulator activity;protein binding	Pf00168, Pf00169, Pf00620, Pf00621	0.942	0.965	1.019	1.001	0.98	1.018	1.003	1.011	0.999	0.996	0.973	0.955	0.966	0.989	0.95	0.964	0.96	0.95	0.951	0.974	1.02	1.014	0.995	1.003	0.966	0.988	0.991	0.999	1.053
Master Protein	Q2PFD7	PH and SEC7 domain-containing protein 3 OS=Mus musculus GN=Psd3 PE=1 SV=2	Psd3	234353		High	FALSE	58	1072	14	0	432.182	4004.47	46.9624	66.688	8	regulation of biological process;response to stimulus	membrane		Pf00169, Pf01369, Pf15410	1.023	1.017	0.991	0.976	1.001	1.001	0.945	0.904	1.058	1.049	0.945	0.924	0.96	0.967	1.04	1.039	0.978	0.954	1.125	1.116	0.971	0.954	0.958	0.945	0.951	0.944	1.078	1.06	1.073
Master Protein	Q8BMS1	Trifunctional enzyme subunit alpha, mitochondrial OS=Mus musculus GN=Hadha PE=1 SV=1	Hadha	97212	ENSMUSG00000025745	High	FALSE	42	1079	42	0	431.738	4483.25	65.6619	136.891	5	metabolic process;response to stimulus	membrane;mitochondrion;organelle lumen	catalytic activity;nucleotide binding;protein binding	Pf00378, Pf00725, Pf02737	0.951	0.948	0.882	0.873	0.935	0.945	0.89	0.881	0.986	0.985	0.954	0.962	0.912	0.907	0.924	0.917	0.872	0.852	0.98	0.97	0.902	0.903	0.894	0.887	0.96	0.978	0.972	0.965	0.938
Master Protein	E9PWE8	Dihydropyrimidinase-related protein 3 OS=Mus musculus GN=Dpysl3 PE=1 SV=1	Dpysl3	22240	ENSMUSG00000024501	High	FALSE	36	3372	30	0	430.984	13990.2	65.3001	250.189	18	cell organization and biogenesis;metabolic process;regulation of biological process;response to stimulus	cytoplasm;cytosol	catalytic activity;protein binding	Pf01979, Pf04909, Pf13147, Pf13594	0.963	0.944	1.019	1.008	0.935	0.942	0.97	0.95	1.033	1.003	1.021	1.041	0.968	0.947	0.998	0.983	0.98	0.951	1.071	1.034	1.073	1.091	1.039	1.057	0.892	0.887	0.957	0.935	0.904
Master Protein	P70206	Plexin-A1 OS=Mus musculus GN=Plxna1 PE=1 SV=1	Plxna1	18844	ENSMUSG00000030084	High	FALSE	66	714	50	0	429.693	2718.17	41.7107	7.171	6	cell growth;cellular component movement;regulation of biological process;response to stimulus	cytoplasm;membrane;nucleus	protein binding;receptor activity;signal transducer activity	Pf01403, Pf01437, Pf01833, Pf08337	1.028	1.013	0.959	0.992	1.029	1.01	0.888	0.874	1.01	0.976	0.917	0.944	1.093	1.068	1.041	1.029	0.995	0.981	0.968	0.953	0.872	0.905	0.896	0.917	0.989	0.978	0.992	0.963	0.957
Master Protein	Q80TH1	Discs, large homolog 3 (Drosophila), isoform CRA_c (Fragment) OS=Mus musculus GN=Dlg3 PE=2 SV=1	Dlg3	53310		High	FALSE	52	832	5	0	428.879	3335.6	59.8947	64.285	X	cell communication;cell organization and biogenesis;regulation of biological process	cytoplasm;membrane	catalytic activity;protein binding	Pf00018, Pf00595, Pf00625, Pf07653, Pf10368, Pf10600, Pf13180	1.031	0.998	0.925	0.936	1.057	1.027	0.936	0.928	1.01	0.981	0.931	0.932	1.008	0.987	1.028	0.999	0.953	0.942	1.021	0.985	0.929	0.934	0.901	0.904	0.988	0.974	1.046	1.024	1.047
Master Protein	Q5FWI9	Adaptor protein complex AP-2, mu1 OS=Mus musculus GN=Ap2m1 PE=2 SV=1	Ap2m1	11773	ENSMUSG00000022841	High	FALSE	42	2778	42	0	427.8	9455.86	83.6782	2042.36	16	regulation of biological process;transport	membrane;mitochondrion	protein binding	Pf00928	0.947	0.958	0.982	0.971	0.971	0.969	0.916	0.942	0.952	0.953	0.962	0.956	0.941	0.958	0.948	0.959	0.951	0.977	0.948	0.952	0.959	0.955	0.951	0.944	0.958	0.963	0.976	0.974	1.013
Master Protein	P46096	Synaptotagmin-1 OS=Mus musculus GN=Syt1 PE=1 SV=1	Syt1	20979	ENSMUSG00000035864	High	FALSE	33	4865	17	0	427.614	19418.2	67.2209	5753.4	10	cell differentiation;cell organization and biogenesis;regulation of biological process;response to stimulus;transport	cytoplasm;cytosol;Golgi;membrane	metal ion binding;protein binding	Pf00168	1.021	1.035	0.963	0.96	1.013	1.017	0.89	0.888	1.013	1.024	0.94	0.941	1.01	1.031	1.029	1.038	0.929	0.924	0.98	0.991	0.927	0.934	0.922	0.921	0.993	0.995	1.016	1.023	1.043
Master Protein	P27773	Protein disulfide-isomerase A3 OS=Mus musculus GN=Pdia3 PE=1 SV=2	Pdia3	14827	ENSMUSG00000027248	High	FALSE	49	1746	49	0	427.401	6761.12	76.2376	629.957	2	cell communication;cellular homeostasis;metabolic process;regulation of biological process;response to stimulus	cell surface;cytoplasm;endoplasmic reticulum;extracellular;membrane;mitochondrion;nucleus;organelle lumen	catalytic activity;protein binding;RNA binding	Pf00085, Pf13098, Pf13848, Pf13899, Pf13905	0.936	0.94	0.9	0.881	0.959	0.955	0.973	0.985	1.003	1.012	0.993	0.978	0.947	0.962	0.939	0.948	0.867	0.865	1.017	1.024	0.99	0.986	0.949	0.944	0.981	0.982	0.997	0.996	0.974
Master Protein	Q543Y7	Putative uncharacterized protein OS=Mus musculus GN=Pacsin1 PE=2 SV=1	Pacsin1	23969	ENSMUSG00000040276	High	FALSE	52	2532	45	0	427.208	8728.92	83.9002	9209.55	17	cell organization and biogenesis;regulation of biological process;response to stimulus;transport	cytoplasm;cytosol;endosome;membrane	protein binding	Pf00018, Pf00611, Pf07653, Pf14604	0.985	0.99	1.019	1.01	0.933	0.946	0.957	0.987	0.999	0.985	1.006	1.002	0.891	0.915	0.961	0.955	0.984	1.001	1.051	1.039	0.976	0.987	1.015	1.015	0.97	0.994	1.075	1.065	1.064
Master Protein	P11983	T-complex protein 1 subunit alpha OS=Mus musculus GN=Tcp1 PE=1 SV=3	Tcp1	21454	ENSMUSG00000068039	High	FALSE	37	914	4	0	426.948	3636.13	77.8777	295.635	17	metabolic process;regulation of biological process;transport	cytoplasm;cytoskeleton;Golgi	nucleotide binding;protein binding;RNA binding	Pf00118	0.936	0.954	1.014	1.012	0.925	0.97	1.02	1.026	0.955	0.968	1.08	1.067	0.917	0.937	0.931	0.953	0.979	0.959	0.935	0.959	1.039	1.049	1.061	1.069	0.963	1.021	0.981	0.99	1.002
Master Protein	Q8K596	Protein Slc8a2 OS=Mus musculus GN=Slc8a2 PE=2 SV=1	Slc8a2	110891	ENSMUSG00000030376	High	FALSE	36	1520	35	0	426.592	6570.23	43.7568	247.163	7	cell communication;cellular homeostasis;regulation of biological process;response to stimulus;transport	membrane;mitochondrion	metal ion binding;protein binding;transporter activity	Pf01699, Pf03160	1.017	1.029	1.027	1.033	1.101	1.084	0.842	0.866	0.971	0.978	0.924	0.925	1.07	1.088	1.02	1.032	0.983	0.995	0.999	1.017	0.909	0.918	0.897	0.901	1.005	1.008	1.05	1.058	1.065
Master Protein	P80315	T-complex protein 1 subunit delta OS=Mus musculus GN=Cct4 PE=1 SV=3	Cct4	12464	ENSMUSG00000007739	High	FALSE	42	887	41	0	426.171	3680.57	84.9722	218.839	11	metabolic process;regulation of biological process;transport	cytoplasm;cytoskeleton	nucleotide binding;protein binding;RNA binding	Pf00118	0.942	0.981	0.961	0.952	0.884	0.905	1.006	0.995	0.962	0.992	1.025	1.008	0.91	0.947	0.936	0.983	0.962	0.944	0.934	0.966	0.989	0.978	1.006	1.003	0.931	0.944	0.968	0.998	0.975
Master Protein	A2A5R2	Brefeldin A-inhibited guanine nucleotide-exchange protein 2 OS=Mus musculus GN=Arfgef2 PE=1 SV=1	Arfgef2	99371	ENSMUSG00000074582	High	FALSE	72	426	58	0	425.419	1636.43	47.9911	6.96	2	cell organization and biogenesis;metabolic process;regulation of biological process;response to stimulus;transport	cytoplasm;cytoskeleton;cytosol;endosome;Golgi;membrane	protein binding	Pf01369, Pf09324, Pf12783	0.965	0.983	0.95	0.951	0.958	0.954	0.996	0.958	0.998	1.011	0.987	0.993	0.942	0.957	0.986	0.975	0.967	0.93	0.974	1.003	0.969	0.982	0.972	0.994	0.956	0.98	0.991	1.01	1.014
Master Protein	Q9QYB8	Beta-adducin OS=Mus musculus GN=Add2 PE=1 SV=4	Add2	11519	ENSMUSG00000030000	High	FALSE	43	1425	16	0	425.193	5210.39	67.4483	159.157	6	cell organization and biogenesis;regulation of biological process;transport	cytoplasm;cytoskeleton;membrane	protein binding;structural molecule activity	Pf00596, Pf03344	1.02	1.036	0.99	0.99	1.03	1.037	0.936	0.938	0.997	0.999	0.966	0.958	1.04	1.06	1.029	1.045	0.963	0.946	1.008	1.016	0.956	0.963	0.971	0.977	0.984	0.986	1.025	1.036	1.037
Master Protein	Q99NE5	Regulating synaptic membrane exocytosis protein 1 OS=Mus musculus GN=Rims1 PE=1 SV=2	Rims1	116837		High	FALSE	68	615	18	0	425.075	2485.76	55.9809	12.25	1	cell differentiation;cell organization and biogenesis;regulation of biological process;transport	membrane	metal ion binding;protein binding;RNA binding	Pf00168, Pf00595, Pf02318	1.032	1.02	1.005	0.955	1.013	0.982	0.915	0.926	1.008	1.012	0.948	0.915	1.011	1.013	1.03	1.016	0.963	0.973	1.009	0.998	0.961	0.92	0.949	0.909	0.954	0.929	1.05	1.031	1.031
Master Protein	P26041	Moesin OS=Mus musculus GN=Msn PE=1 SV=3	Msn	17698	ENSMUSG00000031207	High	FALSE	59	1016	43	0	424.659	3562.89	73.1369	569.292	X	cell differentiation;cell organization and biogenesis;cellular component movement;regulation of biological process;response to stimulus	cell surface;cytoplasm;cytoskeleton;membrane;nucleus	protein binding;RNA binding	Pf00373, Pf00769, Pf09379, Pf09380	0.834	0.821	0.737	0.735	0.815	0.819	0.881	0.879	0.937	0.935	0.916	0.921	0.809	0.803	0.831	0.823	0.747	0.752	0.969	0.963	0.939	0.945	0.875	0.878	0.84	0.851	0.904	0.883	0.848
Master Protein	E9PV14	Band 4.1-like protein 1 (Fragment) OS=Mus musculus GN=Epb4.1l1 PE=1 SV=1	Epb4.1l1		ENSMUSG00000027624	High	FALSE	52	1214	16	0	424.621	4154.93	51.9737	39.103	2	cell organization and biogenesis	cytoplasm;cytoskeleton	protein binding	Pf00373, Pf04382, Pf08736, Pf09379, Pf09380	1.036	1.062	0.943	0.95	1.037	1.033	0.957	0.914	1.037	1.055	0.892	0.908	0.965	0.982	0.956	0.981	0.807	0.803	0.999	1.027	0.89	0.932	0.911	1.022	1.019	1.074	1.118	1.144	1.095
Master Protein	Q6NY00	Aldolase A, fructose-bisphosphate OS=Mus musculus GN=Aldoa PE=2 SV=1	Aldoa	11674		High	FALSE	42	7438	7	0	423.543	30825.7	88.4615	8184.47	7	cellular homeostasis;metabolic process;regulation of biological process	cytoplasm;cytoskeleton;membrane;mitochondrion;nucleus	catalytic activity;protein binding;RNA binding	Pf00274	0.932	0.926	0.926	0.92	0.946	0.945	0.921	0.928	0.966	0.959	0.941	0.942	0.902	0.893	0.947	0.941	0.871	0.877	0.941	0.938	0.93	0.931	0.949	0.952	0.941	0.947	0.968	0.968	0.98
Master Protein	E9PYX7	Afadin OS=Mus musculus GN=Mllt4 PE=1 SV=1	Mllt4		ENSMUSG00000068036	High	FALSE	66	554	1	0	422.617	2066.98	46.3019	10.233	17	regulation of biological process;response to stimulus		protein binding	Pf00498, Pf00595, Pf00788, Pf01843	0.997	0.884	0.904	0.986	0.594	0.573	1.032	0.888	1.037	0.888	1.016	0.956	1.049	0.91	1.006	0.858	0.937	0.84	1.015	0.898	1.013	0.996	0.93	0.92	0.588	0.548	1.055	0.947	0.559
Master Protein	O08532-4	Isoform 2D of Voltage-dependent calcium channel subunit alpha-2/delta-1 OS=Mus musculus GN=Cacna2d1	Cacna2d1	12293	ENSMUSG00000040118	High	FALSE	48	962	1	0	421.987	3462.62	47.9742	45.416	5	regulation of biological process;transport	endoplasmic reticulum;membrane	metal ion binding;protein binding;transporter activity	Pf00092, Pf02743, Pf08399, Pf08473, Pf13519, Pf13768	0.835		0.939	1.032		0.968		0.795	0.896		0.925	0.903	0.886		0.861			0.853	0.833		1.024	1.05	1.119	1.093		0.959	0.79
Master Protein	O08539	Myc box-dependent-interacting protein 1 OS=Mus musculus GN=Bin1 PE=1 SV=1	Bin1	30948	ENSMUSG00000024381	High	FALSE	40	1351	5	0	420.244	5441.27	62.9252	1358.36	18	cell differentiation;cell organization and biogenesis;development;regulation of biological process;transport	cytoplasm;membrane;nucleus	protein binding	Pf00018, Pf03114, Pf07653, Pf14604	0.926	0.962	0.975	0.939	0.925	0.931	0.95	0.954	0.916	0.945	0.957	0.951	0.932	0.964	0.909	0.947	0.9	0.888	0.983	1.018	1.003	0.983	0.98	0.979	1.001	1.01	0.997	1.022	1.041
Master Protein	Q3TYK5	Putative uncharacterized protein OS=Mus musculus GN=Pde2a PE=2 SV=1	Pde2a	207728		High	FALSE	46	1085	1	0	419.536	4448.58	65.7143	42.288	7	metabolic process;regulation of biological process;response to stimulus;transport	cytoplasm;cytosol;endoplasmic reticulum;Golgi;membrane;nucleus;organelle lumen	catalytic activity;metal ion binding;nucleotide binding;protein binding	Pf00233, Pf01590, Pf13185, Pf13492			1.057	1.1				0.964			1.235	1.276						0.973			1.341	1.414	1.111	1.024
Master Protein	G3X9G4	Dynamin-2 OS=Mus musculus GN=Dnm2 PE=1 SV=1	Dnm2	13430	ENSMUSG00000033335	High	FALSE	58	1627	1	0	419.074	5189.41	61.7241	87.587	9	cell organization and biogenesis;metabolic process;regulation of biological process;response to stimulus;transport	cytoplasm;cytoskeleton;cytosol;endosome;Golgi;membrane;nucleus	catalytic activity;nucleotide binding;protein binding	Pf00169, Pf00350, Pf01031, Pf02212	0.96	0.973	0.894	0.875	0.968	0.924	0.922	0.919	1.001	1.014	0.974	0.972	0.951	0.972	0.958	0.978	0.861	0.849	1.001	1.012	0.935	0.919	0.93	0.94	1.004	0.954	0.997	1.003	0.974
Master Protein	D3Z7P3-2	Isoform 2 of Glutaminase kidney isoform, mitochondrial OS=Mus musculus GN=Gls	Gls	14660	ENSMUSG00000026103	High	FALSE	37	1036	3	0	418.789	4462.9	63.5158	243.844	1	cell communication;cell organization and biogenesis;metabolic process;regulation of biological process;response to stimulus	cytoplasm;mitochondrion;organelle lumen	catalytic activity;protein binding	Pf04960	0.999	1.005	1.097	0.965	1.003	1.047	0.918	0.902	0.935	1.002	1.003	0.851	1.084	1.05	0.943	1.015	0.893	0.918	1.054	1.028	1.008	0.965	1.039	0.923	1.036	1.033	0.962	0.998	1.041
Master Protein	E9PUA3	IQ motif and SEC7 domain-containing protein 1 OS=Mus musculus GN=Iqsec1 PE=1 SV=1	Iqsec1	232227	ENSMUSG00000034312	High	FALSE	60	947	53	0	416.714	3608.95	50.7734	49.69	6	cell organization and biogenesis;regulation of biological process	cytoplasm;membrane;nucleus	protein binding	Pf01369	1.006	1.002	0.978	0.957	0.994	0.982	0.951	0.946	1.011	1	0.975	0.971	1.002	1.014	1.018	1.004	0.952	0.939	1.001	0.987	0.96	0.959	0.974	0.969	0.973	0.979	1.012	1.013	1.027
Master Protein	P16125	L-lactate dehydrogenase B chain OS=Mus musculus GN=Ldhb PE=1 SV=2	Ldhb	16832	ENSMUSG00000030246	High	FALSE	30	3057	27	0	416.244	11642.1	73.6527	21543.3	6	metabolic process	cytoplasm;membrane;mitochondrion	catalytic activity;nucleotide binding;protein binding	Pf00056, Pf02866	0.904	0.956	0.894	0.885	0.903	0.912	0.945	0.984	1.042	1.047	1.014	1.012	0.882	0.908	0.945	0.951	0.835	0.85	1.048	1.061	0.94	0.931	0.975	0.979	1.03	1.052	1.037	1.053	1.017
Master Protein	Q3UGC8	Propionyl-Coenzyme A carboxylase, alpha polypeptide, isoform CRA_b OS=Mus musculus GN=Pcca PE=2 SV=1	Pcca	110821	ENSMUSG00000041650	High	FALSE	43	800	43	0	416.229	3072.84	64.779	57.78	14	metabolic process	extracellular;mitochondrion;organelle lumen	catalytic activity;metal ion binding;nucleotide binding;protein binding	Pf00289, Pf00364, Pf01071, Pf02222, Pf02258, Pf02785, Pf02786, Pf07478, Pf08442, Pf13533, Pf13535, Pf13549, Pf15632	0.992	0.977	0.923	0.903	0.975	0.952	0.934	0.934	0.989	0.982	0.963	0.94	0.996	0.986	0.964	0.955	0.926	0.914	0.952	0.928	0.936	0.915	0.921	0.902	0.964	0.944	0.987	0.973	0.975
Master Protein	P80316	T-complex protein 1 subunit epsilon OS=Mus musculus GN=Cct5 PE=1 SV=1	Cct5	12465	ENSMUSG00000022234	High	FALSE	42	1192	41	0	414.907	4700.26	78.9279	526.5	15	metabolic process;regulation of biological process;response to stimulus;transport	cytoplasm;cytoskeleton	nucleotide binding;protein binding	Pf00118	0.988	0.957	0.94	0.927	0.945	0.948	0.969	0.952	1.011	0.971	0.998	0.993	0.956	0.928	0.991	0.964	0.942	0.93	0.979	0.959	0.963	0.96	0.975	0.973	0.976	0.982	1.018	0.98	0.991
Master Protein	Q3TJ43	Vacuolar protein sorting-associated protein 35 OS=Mus musculus GN=Vps35 PE=2 SV=1	Vps35	65114		High	FALSE	46	730	46	0	414.312	3075.79	63.6935	68.685	8	metabolic process;regulation of biological process;transport	cytoplasm;cytosol;endosome;membrane	protein binding;transporter activity	Pf03635	0.925	0.926	0.983	0.989	0.936	0.953	0.957	0.957	0.959	0.945	0.996	1.006	0.942	0.947	0.935	0.934	0.938	0.946	0.952	0.926	0.99	1.012	0.976	0.996	0.904	0.943	0.949	0.939	0.929
Master Protein	Q80Y35	Nuclear mitotic apparatus protein 1 OS=Mus musculus GN=Numa1 PE=2 SV=1	Numa1	101706		High	FALSE	79	405	1	0	414.099	1524.56	42.5979	4.155	7	cell differentiation;cell organization and biogenesis;metabolic process	cytoplasm;membrane;nucleus	protein binding	Pf04111, Pf09726, Pf12128, Pf14992			0.765								0.972										1.066		0.719
Master Protein	A2A5Y6	Microtubule-associated protein OS=Mus musculus GN=Mapt PE=1 SV=1	Mapt	17762	ENSMUSG00000018411	High	FALSE	43	2222	7	0	413.77	8383.93	56.0748	280.838	11	cell death;cell growth;cell organization and biogenesis;cellular component movement;regulation of biological process;response to stimulus;transport	cytoplasm;cytoskeleton;membrane;nucleus	protein binding	Pf00418	0.9	0.9	0.814	0.804	0.849	0.848	0.815	0.828	0.939	0.953	0.849	0.837	0.948	0.951	1.063	1.058	0.872	0.886	1.184	1.202	1.211	1.215	1.098	1.104	0.898	0.897	0.953	0.966	0.919
Master Protein	Q8CGY8	UDP-N-acetylglucosamine--peptide N-acetylglucosaminyltransferase 110 kDa subunit OS=Mus musculus GN=Ogt PE=1 SV=2	Ogt	108155	ENSMUSG00000034160	High	FALSE	46	694	46	0	412.858	2880.94	53.2505	49.548	X	cell death;cell organization and biogenesis;cellular homeostasis;metabolic process;regulation of biological process;response to stimulus	cytoplasm;cytosol;membrane;mitochondrion;nucleus	catalytic activity;enzyme regulator activity;protein binding	Pf00515, Pf04184, Pf07719, Pf13176, Pf13181, Pf13374, Pf13414, Pf13424, Pf13428, Pf13429, Pf13431, Pf13432, Pf13844, Pf14559	0.997	0.981	0.961	0.95	1.008	1.025	0.943	0.938	1.017	0.997	0.999	0.965	0.995	0.976	1.01	1.004	0.962	0.953	1.042	1.02	0.961	0.945	0.961	0.941	0.98	0.984	1.04	1.016	1.024
Master Protein	Q8CGK3	Lon protease homolog, mitochondrial OS=Mus musculus GN=Lonp1 PE=1 SV=2	Lonp1	74142	ENSMUSG00000041168	High	FALSE	45	590	45	0	412.5	2481.1	63.8567	35.425	17	cell organization and biogenesis;metabolic process;response to stimulus	cytoplasm;membrane;mitochondrion;nucleus;organelle lumen	catalytic activity;DNA binding;nucleotide binding;protein binding;RNA binding	Pf00004, Pf00910, Pf01695, Pf02190, Pf05362, Pf05496, Pf07724, Pf07726, Pf07728, Pf08298, Pf13173, Pf13191, Pf13207, Pf13401, Pf13541	0.992	0.979	0.966	0.944	0.985	0.964	0.963	0.939	1.025	1.003	0.994	0.997	1.033	1.015	0.976	0.959	0.918	0.901	1.012	0.992	1.004	1.004	0.987	0.985	1.024	1.011	1.006	1.001	1.024
Master Protein	E9Q7G0	Protein Numa1 OS=Mus musculus GN=Numa1 PE=1 SV=1	Numa1	101706	ENSMUSG00000066306	High	FALSE	79	405	1	0	412.383	1521.03	42.5501	4.155	7	cell differentiation;cell organization and biogenesis;metabolic process	cytoplasm;membrane;nucleus	protein binding	Pf04111, Pf09726, Pf12128, Pf14992	0.964	0.969	0.858	0.877	0.942	0.959	0.883	0.888	1.002	0.993	0.948	0.975	0.926	0.967	0.988	0.982	0.887	0.862	0.986	0.965	0.921	0.95	0.878	0.876	0.921	0.936	1	0.968	0.964
Master Protein	P40124	Adenylyl cyclase-associated protein 1 OS=Mus musculus GN=Cap1 PE=1 SV=4	Cap1	12331	ENSMUSG00000028656	High	FALSE	33	1170	1	0	412.122	4767.68	75.5274	688.779	4	cell organization and biogenesis;cellular component movement;transport	cytoplasm;cytoskeleton;cytosol;extracellular;membrane	protein binding	Pf01213, Pf07986, Pf08603	0.944	0.945	0.94	0.935	0.959	0.963	0.954	0.974	0.972	0.955	0.976	0.965	0.938	0.921	0.943	0.938	0.919	0.92	0.969	0.954	0.986	0.979	0.96	0.966	0.958	0.978	1.013	1.008	1.028
Master Protein	Q3U0U5	Adenylyl cyclase-associated protein OS=Mus musculus GN=Cap1 PE=2 SV=1	Cap1	12331		High	FALSE	33	1187	1	0	411.513	4861.15	75.5274	688.779	4	cell organization and biogenesis;cellular component movement;transport	cytoplasm;cytoskeleton;membrane	protein binding	Pf01213, Pf07986, Pf08603	0.954	0.687	0.785	0.915	0.904	0.725			1.031	0.737	0.748	0.886	1.182	0.892	1.027	0.679			0.941	0.679	0.792	0.939	0.843	0.92	0.84	0.735	1.09	0.817	0.962
Master Protein	Q9QXS6	Drebrin OS=Mus musculus GN=Dbn1 PE=1 SV=4	Dbn1	56320	ENSMUSG00000034675	High	FALSE	42	1337	42	0	411.288	6214.42	59.2068	1486.35	13	cell communication;cell differentiation;cell organization and biogenesis;cell proliferation;development;regulation of biological process	cytoplasm;cytoskeleton;membrane	protein binding	Pf00241	1.053	1.029	0.954	0.934	1.042	1.093	0.89	0.908	0.994	0.985	0.925	0.911	1.029	1.038	1.049	1.035	0.967	0.962	1.037	1.017	0.948	0.932	0.89	0.883	0.975	1.023	1.059	1.038	1.043
Master Protein	P27546	Microtubule-associated protein 4 OS=Mus musculus GN=Map4 PE=1 SV=3	Map4; Mtap4	17758	ENSMUSG00000032479	High	FALSE	55	968	24	0	411.163	3420.79	51.2	47.812	9	cell division;cell organization and biogenesis;cellular component movement;regulation of biological process	cytoplasm;cytoskeleton;membrane	protein binding;RNA binding	Pf00418	0.946	0.899	0.81	0.834	0.885	0.885	0.96	0.976	0.979	0.931	0.859	0.922	0.841	0.817	0.901	0.859	0.818	0.812	1.07	1.029	0.966	1.011	0.879	0.95	0.965	0.957	1.023	0.992	1.019
Master Protein	Q60875	Rho guanine nucleotide exchange factor 2 OS=Mus musculus GN=Arhgef2 PE=1 SV=4	Arhgef2	16800	ENSMUSG00000028059	High	FALSE	52	638	52	0	410.948	2490.62	63.0457	33.061	3	cell division;cell organization and biogenesis;defense response;metabolic process;regulation of biological process;response to stimulus	cytoplasm;cytoskeleton;Golgi	catalytic activity;metal ion binding;protein binding	Pf00130, Pf00169, Pf00621, Pf07649	1.019	1.011	0.966	0.965	1.071	1.05	0.952	0.935	0.979	0.988	0.933	0.937	0.994	0.993	1.013	1.005	0.989	0.976	1.048	1.047	0.968	0.973	0.948	0.951	0.98	0.984	1.036	1.025	1.07
Master Protein	P62631	Elongation factor 1-alpha 2 OS=Mus musculus GN=Eef1a2 PE=1 SV=1	Eef1a2	13628	ENSMUSG00000016349	High	FALSE	37	2191	20	0	410.759	8231.26	82.7214	5247.07	2	metabolic process;regulation of biological process;response to stimulus	cytoplasm;nucleus	catalytic activity;nucleotide binding;protein binding;RNA binding	Pf00009, Pf03143, Pf03144	0.964	0.974	0.953	0.941	0.943	0.956	0.952	0.969	1.023	1.033	1.008	0.989	0.931	0.923	0.959	0.977	0.906	0.9	1.059	1.064	0.987	0.976	0.985	0.973	0.965	0.988	1.031	1.025	1.023
Master Protein	Q61548	Clathrin coat assembly protein AP180 OS=Mus musculus GN=Snap91 PE=1 SV=1	Snap91	20616		High	FALSE	30	1936	1	0	409.649	8027.14	34.8502	3018.95	9	cell communication;cell organization and biogenesis;regulation of biological process;transport	membrane	protein binding	Pf01417, Pf07651	1.053	1.063	0.953	0.939	1.031	1.036	0.876	0.877	0.943	0.941	0.899	0.906	0.986	1.002	1.015	1.022	0.909	0.914	1.039	1.04	0.972	0.976	0.917	0.914	0.996	1.008	1.053	1.061	1.112
Master Protein	Q8BWF0	Succinate-semialdehyde dehydrogenase, mitochondrial OS=Mus musculus GN=Aldh5a1 PE=1 SV=1	Aldh5a1	214579	ENSMUSG00000035936	High	FALSE	32	1444	32	0	408.029	6369.04	70.9369	474.794	13	cell organization and biogenesis;metabolic process	mitochondrion	catalytic activity;nucleotide binding	Pf00171	0.952	0.987	0.978	0.973	0.934	0.924	0.919	0.934	0.961	0.986	1.006	1.014	0.931	0.957	0.938	0.974	0.924	0.928	0.896	0.928	0.939	0.949	0.979	0.988	0.966	0.961	0.995	1.02	0.99
Master Protein	Q80U49	Centrosomal protein of 170 kDa protein B OS=Mus musculus GN=Cep170b PE=1 SV=2	AW555464; Cep170b	217882	ENSMUSG00000072825	High	FALSE	69	599	67	0	407.877	2096.04	53.1131	8.16	12		cytoplasm;cytoskeleton	protein binding	Pf00498, Pf15308	1.018	1.003	0.935	0.922	0.982	0.974	0.923	0.925	1.02	1	0.932	0.929	0.947	0.946	1.018	1.001	0.903	0.905	1.05	1.034	0.976	0.962	0.95	0.943	0.998	1.006	1.056	1.045	1.021
Master Protein	P80313	T-complex protein 1 subunit eta OS=Mus musculus GN=Cct7 PE=1 SV=1	Cct7	12468	ENSMUSG00000030007	High	FALSE	40	1364	40	0	407.172	5104.27	70.7721	348.025	6	metabolic process;regulation of biological process;transport	cytoplasm;mitochondrion	nucleotide binding;protein binding	Pf00118	1.005	0.966	0.961	0.949	0.948	0.958	0.929	0.939	1.012	0.951	0.981	0.994	0.973	0.943	1.015	0.973	0.907	0.901	0.978	0.936	0.967	0.967	0.968	0.98	0.974	0.99	1.008	0.963	0.979
Master Protein	Q80ZI9	WD repeat domain 1 (Fragment) OS=Mus musculus GN=Wdr1 PE=2 SV=1	Wdr1	22388		High	FALSE	39	1409	1	0	407.146	6064.71	66.2614	99	5	cell organization and biogenesis;regulation of biological process	cytoplasm;cytoskeleton	protein binding	Pf00400, Pf04762, Pf08662, Pf14783	0.965	0.989	0.965	0.949	0.945	0.955	0.962	0.962	0.969	0.981	0.993	0.982	0.91	0.937	0.968	0.985	0.965	0.953	0.953	0.966	0.963	0.962	0.962	0.956	0.937	0.954	0.991	1.012	0.994
Master Protein	P12382	ATP-dependent 6-phosphofructokinase, liver type OS=Mus musculus GN=Pfkl PE=1 SV=4	Pfkl	18641	ENSMUSG00000020277	High	FALSE	39	1597	31	0	406.59	6136.05	56.7949	99	10	cell organization and biogenesis;metabolic process;regulation of biological process;response to stimulus	cytoplasm;cytosol;membrane	catalytic activity;metal ion binding;nucleotide binding;protein binding	Pf00365	1.008	1.01	0.915	0.917	1.004	1.014	0.879	0.883	0.998	0.998	0.891	0.896	0.997	0.997	1.012	1.002	0.898	0.897	0.983	0.982	0.9	0.895	0.897	0.892	0.956	0.989	1.022	1.021	1.016
Master Protein	Q8BVE3	V-type proton ATPase subunit H OS=Mus musculus GN=Atp6v1h PE=1 SV=1	Atp6v1h	108664	ENSMUSG00000033793	High	FALSE	32	1330	32	0	405.898	5532.3	69.5652	1278.8	1	transport	membrane	catalytic activity;transporter activity	Pf03224, Pf11698	1	0.994	1.003	0.994	0.962	0.986	0.939	0.952	0.986	0.974	0.998	1	1.02	1.023	1.02	1.009	0.939	0.943	0.944	0.933	0.998	1.003	0.98	0.988	0.967	0.984	1.003	0.992	1.004
Master Protein	E9QAD8	IQ motif and SEC7 domain-containing protein 2 OS=Mus musculus GN=Iqsec2 PE=1 SV=1	Iqsec2	245666	ENSMUSG00000041115	High	FALSE	62	603	55	0	404.957	2194.75	47.1102	19.497	X	cell organization and biogenesis;regulation of biological process;reproduction	cytoplasm	protein binding	Pf01369, Pf06005	0.991	1.004	0.943	0.951	1.031	1.013	0.912	0.923	1.002	1.008	0.925	0.941	0.976	1.002	1.009	1.018	1.008	0.999	1.026	1.024	0.934	0.962	0.919	0.934	0.943	0.934	1.02	1.031	1.032
Master Protein	F8WGF2	Nitric oxide synthase, brain OS=Mus musculus GN=Nos1 PE=4 SV=1	Nos1	18125	ENSMUSG00000029361	High	FALSE	66	612	65	0	404.337	2340.26	49.2139	10.303	5	cellular homeostasis;metabolic process;regulation of biological process;response to stimulus	cytoplasm;cytoskeleton;cytosol;endoplasmic reticulum;membrane;mitochondrion;nucleus;vacuole	catalytic activity;metal ion binding;nucleotide binding;protein binding	Pf00175, Pf00258, Pf00595, Pf00667, Pf02898, Pf13180	0.891	0.983	0.985	0.983	1.005	1.022	0.842	0.828	0.93	1.02	0.98	0.98	0.886	0.997	0.926	1.021	0.963	0.948	0.921	1.004	0.942	0.939	0.94	0.946	0.876	0.871	0.93	1.015	0.927
Master Protein	Q9CS84	Neurexin-1 OS=Mus musculus GN=Nrxn1 PE=1 SV=3	Nrxn1	18189	ENSMUSG00000024109	High	FALSE	50	856	20	0	404.199	3170.68	41.3474	17.478	17	cell communication;cell organization and biogenesis;regulation of biological process;response to stimulus;transport	cell surface;endoplasmic reticulum;membrane	metal ion binding;protein binding;receptor activity;signal transducer activity	Pf00008, Pf00054, Pf02210, Pf13385	0.972	0.937	0.876	0.874	0.951	0.95	0.9	0.907	1.013	0.995	0.974	0.972	0.927	0.903	0.975	0.955	0.909	0.905	1.046	1.027	0.956	0.973	0.929	0.936	0.954	0.978	1	0.978	0.997
Master Protein	Q9JJZ2	Tubulin alpha-8 chain OS=Mus musculus GN=Tuba8 PE=1 SV=1	Tuba8	53857	ENSMUSG00000030137	High	FALSE	29	12426	10	0	403.783	54358.5	61.0245	3479.7	6	cell organization and biogenesis;metabolic process	cytoplasm;cytoskeleton	catalytic activity;nucleotide binding;structural molecule activity	Pf00091, Pf03953	0.998	0.958	0.969	0.976	1.021	1.033	0.863	0.841	0.918	0.867	0.873	0.924	0.981	0.943	0.967	0.941	0.856	0.863	0.945	0.888	0.881	0.952	0.857	0.922	0.882	0.896	0.993	0.933	1.01
Master Protein	Q9CZU6	Citrate synthase, mitochondrial OS=Mus musculus GN=Cs PE=1 SV=1	Cs	12974	ENSMUSG00000005683	High	FALSE	33	3174	22	0	403.535	10679.1	64.0086	11052	10	metabolic process	mitochondrion;nucleus;organelle lumen	catalytic activity;RNA binding	Pf00285	0.915	0.885	0.972	0.976	0.918	0.901	0.978	0.977	0.929	0.9	1.004	1.019	0.871	0.846	0.896	0.866	0.966	0.959	0.932	0.903	0.966	0.99	0.96	0.974	0.937	0.933	0.94	0.918	0.987
Master Protein	Q3TW71	Putative uncharacterized protein OS=Mus musculus GN=Psmd2 PE=2 SV=1	Psmd2	21762		High	FALSE	44	712	44	0	403.41	2994.08	62.7753	28.825	16	metabolic process;regulation of biological process	membrane;nucleus;proteasome	catalytic activity;enzyme regulator activity;protein binding	Pf01851	0.995	0.978	0.934	0.922	0.994	0.967	0.952	0.932	1.009	1.004	0.962	0.964	0.964	0.973	1.002	0.995	0.93	0.906	1	1.006	0.952	0.953	0.945	0.95	0.984	0.956	1.01	1.007	1.008
Master Protein	Q8K0U4	Heat shock 70 kDa protein 12A OS=Mus musculus GN=Hspa12a PE=1 SV=1	Hspa12a	73442	ENSMUSG00000025092	High	FALSE	48	1874	45	0	403.333	7383.2	74.6667	241.446	19			nucleotide binding	Pf00012	1.02	1.012	1.013	1	1.028	1.037	0.927	0.942	1.006	0.999	0.96	0.936	0.986	0.967	1.035	1.022	0.963	0.985	1.014	1.009	0.961	0.944	0.954	0.934	0.94	0.947	0.952	0.955	0.972
Master Protein	P68404-2	Isoform Beta-II of Protein kinase C beta type OS=Mus musculus GN=Prkcb	Prkcb	18751	ENSMUSG00000052889	High	FALSE	43	1371	3	0	403.027	5350.35	63.1501	244.609	7	cell death;cell organization and biogenesis;cellular homeostasis;metabolic process;regulation of biological process;response to stimulus;transport	cytoplasm;cytosol;membrane;nucleus	catalytic activity;metal ion binding;nucleotide binding;protein binding	Pf00069, Pf00130, Pf00168, Pf00433, Pf07714	1.011	0.993	0.907	0.931	0.976	0.987	0.961	0.978	1.039	1.007	0.941	0.96	0.982	0.958	1.027	1.011	0.931	0.951	1.084	1.047	0.931	0.956	0.924	0.949	1.047	1.06	1.092	1.069	1.058
Master Protein	E9Q6R7	Protein Utrn OS=Mus musculus GN=Utrn PE=1 SV=1	Utrn	22288	ENSMUSG00000019820	High	FALSE	79	377	7	0	402.832	1356.39	28.4548	1.944	10	cell organization and biogenesis;regulation of biological process	cytoplasm;cytoskeleton;membrane	metal ion binding;protein binding	Pf00307, Pf00397, Pf00435, Pf00569, Pf09068, Pf09069, Pf11971	0.89	0.925	0.856	0.825	0.915	0.888	0.876	0.85	0.997	1.023	0.912	0.902	0.899	0.897	0.914	0.916	0.843	0.802	0.937	0.976	0.935	0.91	0.857	0.846	0.95	0.896	0.975	0.975	0.935
Master Protein	Q61292	Laminin subunit beta-2 OS=Mus musculus GN=Lamb2 PE=2 SV=2	Lamb2	16779	ENSMUSG00000052911	High	FALSE	55	674	55	0	402.588	2604.68	36.1868	6.087	9	cell differentiation;cell growth;cell organization and biogenesis;cellular component movement;metabolic process;regulation of biological process;transport	cytoplasm;extracellular	protein binding	Pf00053, Pf00055, Pf00769, Pf01442, Pf04012, Pf06008, Pf07111, Pf11740, Pf12128, Pf13514, Pf14662, Pf15558	0.93	0.958	0.884	0.872	0.874	0.88	0.865	0.86	1.002	1.017	0.858	0.862	0.948	0.975	0.926	0.951	0.905	0.892	0.961	0.988	0.895	0.9	0.83	0.822	0.959	0.957	1.094	1.089	0.967
Master Protein	B2RTN5	Glucocorticoid receptor DNA binding factor 1 OS=Mus musculus GN=Arhgap35 PE=2 SV=1	Grlf1; Arhgap35	232906	ENSMUSG00000058230	High	FALSE	59	385	59	0	401.491	1517.86	48.1654	10.7	7	metabolic process;regulation of biological process;response to stimulus;transport	cytoplasm;cytoskeleton;cytosol;nucleus	DNA binding;enzyme regulator activity;nucleotide binding;protein binding;transporter activity	Pf00071, Pf00620, Pf02421	1.004	1.006	0.965	0.933	1.009	1.006	0.935	0.93	1.008	1.03	0.991	0.973	0.999	0.991	1.016	1.02	0.927	0.906	1.024	1.037	0.973	0.949	0.962	0.941	0.999	1.012	1.023	1.046	1.019
Master Protein	P70175	Disks large homolog 3 OS=Mus musculus GN=Dlg3 PE=1 SV=1	Dlg3	53310	ENSMUSG00000000881	High	FALSE	48	805	1	0	401.458	3233.52	61.4841	70.969	X	cell communication;cell organization and biogenesis;metabolic process;regulation of biological process	cytoplasm;membrane	catalytic activity;protein binding	Pf00018, Pf00595, Pf00625, Pf07653, Pf10368, Pf10600, Pf13180	0.976	0.875	0.933	1.044	1.186	1.131	0.946	1.117	0.977	1.079	0.976	1.153	0.94	0.966	1.069	1.099	1.069	1.281	1.005	1.069	0.975	1.118	0.981	1.227	1.249	0.958	1.1	1.194	1.19
Master Protein	Q3U111	Putative uncharacterized protein (Fragment) OS=Mus musculus GN=Rdx PE=2 SV=1	Rdx	19684		High	FALSE	51	859	34	0	401.165	3101.26	59.0634	193.486	9	cell organization and biogenesis;regulation of biological process;response to stimulus	cytoplasm;cytoskeleton;membrane	protein binding;RNA binding	Pf00373, Pf00769, Pf09379, Pf09380	0.92	0.912	0.881	0.876	0.871	0.911	0.998	0.984	0.992	1.003	0.987	0.996	0.91	0.897	0.938	0.924	0.879	0.855	1.008	1.014	0.972	0.975	0.959	0.975	0.938	0.947	1.006	1.003	0.946
Master Protein	P97807	Fumarate hydratase, mitochondrial OS=Mus musculus GN=Fh PE=1 SV=3	Fh1	14194	ENSMUSG00000026526	High	FALSE	32	1658	32	0	401.039	6471.66	70.8087	326.455	1	cell organization and biogenesis;metabolic process	cytoplasm;cytosol;mitochondrion	catalytic activity	Pf00206, Pf10415	1.007	0.997	0.929	0.932	0.996	0.992	0.925	0.925	1.047	1.046	0.952	0.975	0.994	1	0.995	0.977	0.91	0.898	1	1	0.935	0.952	0.929	0.949	1.036	1.034	1.017	1.025	1.033
Master Protein	P48678	Prelamin-A/C OS=Mus musculus GN=Lmna PE=1 SV=2	Lmna	16905	ENSMUSG00000028063	High	FALSE	52	1017	50	0	400.399	3834.81	63.3083	121.168	3	cell organization and biogenesis;regulation of biological process;response to stimulus;transport	cytoplasm;membrane;nucleus	protein binding;structural molecule activity	Pf00038, Pf00932, Pf12128	0.946	0.95	0.889	0.865	0.882	0.871	0.898	0.896	1.06	1.044	0.945	0.923	0.928	0.941	0.957	0.965	0.902	0.889	1.05	1.043	0.944	0.923	0.891	0.885	0.959	0.953	1.048	1.037	0.968
Master Protein	P26231	Catenin alpha-1 OS=Mus musculus GN=Ctnna1 PE=1 SV=1	Ctnna1	12385	ENSMUSG00000037815	High	FALSE	55	546	40	0	400.232	2143.25	68.1015	33.983	18	cell organization and biogenesis;regulation of biological process;response to stimulus	cytoplasm;cytoskeleton;cytosol;Golgi;membrane	protein binding;RNA binding;structural molecule activity	Pf01044	0.897	0.915	0.924	0.874	0.914	0.894	0.804	0.876	0.979	0.988	1.036	0.973	0.891	0.93	0.907	0.892	0.76	0.829	0.947	0.966	0.967	0.923	0.982	0.931	0.941	0.928	0.974	0.988	0.917
Master Protein	A0JNY3	Gephyrin OS=Mus musculus GN=Gphn PE=1 SV=1	Gphn	268566	ENSMUSG00000047454	High	FALSE	41	755	41	0	400.153	2946.82	62.1762	69.968	12	cell organization and biogenesis;metabolic process	cytoplasm;cytoskeleton;membrane	catalytic activity;metal ion binding;nucleotide binding;protein binding;structural molecule activity	Pf00994, Pf03453, Pf03454	0.984	1.016	0.969	0.964	0.989	0.989	0.934	0.915	0.942	0.959	0.958	0.953	0.974	1.017	1.001	1.025	0.971	0.951	0.963	0.987	0.954	0.953	0.946	0.947	0.949	0.97	0.993	1.011	1.02
Master Protein	Q3TCI7	L-lactate dehydrogenase OS=Mus musculus GN=Ldha PE=2 SV=1	Ldha	16828		High	FALSE	35	1781	2	0	400.096	6642.45	83.1325	5622.41	7	cell communication;metabolic process;response to stimulus	cytoplasm;cytosol;membrane;mitochondrion;nucleus	catalytic activity;protein binding	Pf00056, Pf02866	0.915	0.91	1.009	0.989	0.942	0.934	0.989	1.011	0.93	0.923	1.024	1.019	0.913	0.914	0.894	0.891	0.911	0.911	0.978	0.975	1.011	1.003	0.994	0.989	0.95	0.954	1.003	0.997	1.03
Master Protein	Q8K1X5	EH-domain containing 1 (Fragment) OS=Mus musculus GN=Ehd1 PE=2 SV=1	Ehd1	13660		High	FALSE	42	983	27	0	399.571	3939.4	74.6403	371.759	19	cell organization and biogenesis;regulation of biological process;response to stimulus;transport	endosome;membrane	metal ion binding;nucleotide binding;protein binding	Pf00350, Pf01926, Pf12763	0.992	0.983	0.963	0.942	1.035	0.994	0.873	0.887	0.974	0.972	0.948	0.923	1.011	1.026	1.009	0.998	0.891	0.91	0.963	0.958	0.949	0.934	0.948	0.929	0.971	0.94	0.995	0.997	0.981
Master Protein	Q3U1J4	DNA damage-binding protein 1 OS=Mus musculus GN=Ddb1 PE=1 SV=2	Ddb1	13194	ENSMUSG00000024740	High	FALSE	53	706	53	0	398.599	2759.87	46.6667	44.262	19	cell organization and biogenesis;metabolic process;regulation of biological process;response to stimulus	cytoplasm;nucleus	DNA binding;protein binding	Pf03178, Pf10433	0.964	0.996	0.936	0.925	0.965	0.979	0.956	0.95	1.003	1.033	1.018	0.994	0.94	0.987	0.973	1.001	0.949	0.955	1.022	1.038	0.981	0.963	0.971	0.963	0.962	0.981	1.022	1.033	0.993
Master Protein	Q80VM5	Dipeptidyl aminopeptidase-like protein 6 OS=Mus musculus GN=Dpp6 PE=2 SV=1	Dpp6	13483	ENSMUSG00000061576	High	FALSE	46	1425	2	0	398.29	5098.37	55.7908	86.333	5	cell organization and biogenesis;metabolic process;regulation of biological process	cell surface;membrane	catalytic activity;protein binding	Pf00326, Pf00930	1.106	1.106	0.966	0.973	0.978	1.043	0.759	0.825	1.043	1.044	0.912	0.887	1.027	0.983	1.104	1.12	0.924	0.967	1.099	1.028	0.849	0.86	0.867	0.857	0.93	0.949	1.048	0.996	0.991
Master Protein	A8IP69	14-3-3 protein gamma subtype OS=Mus musculus GN=Ywhag PE=2 SV=1	Ywhag	22628	ENSMUSG00000051391	High	FALSE	35	4173	25	0	398.25	14548.9	89.8785	77425.4	5	metabolic process;regulation of biological process;response to stimulus;transport	cytoplasm;cytosol;membrane	catalytic activity;protein binding;RNA binding	Pf00244	0.94	0.98	0.933	0.912	0.934	0.933	0.969	0.977	0.969	0.982	0.991	0.984	0.937	0.941	0.985	0.983	0.919	0.91	0.995	1.015	0.96	0.954	0.956	0.949	0.928	0.928	0.994	1.032	1.006
Master Protein	Q9Z1Z0	General vesicular transport factor p115 OS=Mus musculus GN=Uso1 PE=1 SV=2	Uso1	56041	ENSMUSG00000029407	High	FALSE	45	576	45	0	398.134	2420.5	56.3087	48.239	5	cell organization and biogenesis;transport	cytoplasm;cytosol;endoplasmic reticulum;Golgi;membrane	protein binding;RNA binding;transporter activity	Pf04869, Pf04871, Pf13514	0.997	0.986	0.932	0.916	1	0.996	0.965	0.949	1.018	0.991	0.994	0.983	0.985	0.97	1.008	0.998	0.907	0.885	1.039	1.009	0.974	0.984	0.947	0.943	1.013	1.008	1.041	1.035	1.041
Master Protein	Q9ES97	Reticulon-3 OS=Mus musculus GN=Rtn3 PE=1 SV=2	Rtn3	20168	ENSMUSG00000024758	High	FALSE	55	968	48	0	398.031	3526.59	62.3444	59.857	19	cell death;cell organization and biogenesis;transport	endoplasmic reticulum;Golgi;membrane	protein binding	Pf02453	1.076	1.085	0.951	0.951	1.033	1.044	0.896	0.896	1.04	1.048	0.886	0.895	0.992	0.991	1.004	1.017	0.866	0.875	1.158	1.148	0.973	0.973	0.902	0.917	1.033	1.043	1.132	1.116	1.094
Master Protein	Q790I0	Valyl-tRNA synthetase 2, isoform CRA_b OS=Mus musculus GN=Vars PE=3 SV=1	Vars	22321	ENSMUSG00000007029	High	FALSE	52	675	52	0	397.842	2716.26	51.4648	17.078	17	metabolic process;regulation of biological process	cytosol;mitochondrion	catalytic activity;nucleotide binding	Pf00043, Pf00133, Pf08264, Pf09334, Pf13603	0.957	0.967	0.926	0.903	0.938	0.972	0.946	0.919	1.008	1.019	0.962	0.95	0.967	0.982	0.973	0.985	0.905	0.869	1.009	1.023	0.969	0.963	0.952	0.942	0.94	0.973	0.998	1.007	0.957
Master Protein	Q3THB4	L-lactate dehydrogenase OS=Mus musculus GN=Ldha PE=2 SV=1	Ldha	16828		High	FALSE	35	1783	2	0	397.143	6530.29	83.1325	5622.41	7	cell communication;metabolic process;response to stimulus	cytoplasm;cytosol;membrane;mitochondrion;nucleus	catalytic activity;protein binding	Pf00056, Pf02866	1.091	0.976	1.079	1.009	1.022	1.029	1.113	1.01	1.101	1.001	1.136	1.057	1.096	0.992	1.025	0.922	0.945	0.908	1.224	1.105	1.115	1.033	1.005	0.952	1.047	1.052	1.22	1.135	1.165
Master Protein	E9Q9A3	Clathrin coat assembly protein AP180 OS=Mus musculus GN=Snap91 PE=1 SV=2	Snap91	20616	ENSMUSG00000033419	High	FALSE	30	1893	1	0	396.553	7776.17	36.6348	2510.89	9	cell communication;cell organization and biogenesis;regulation of biological process;transport	membrane	protein binding	Pf01417, Pf07651	1.127				0.964	0.871			1.012				0.902		1.015				1.032						1.04	0.967	0.998		0.985
Master Protein	F8VQC7	Kinectin OS=Mus musculus GN=Ktn1 PE=4 SV=1	Ktn1	16709	ENSMUSG00000021843	High	FALSE	73	449	8	0	395.872	1703.87	56.8199	11.244	14	cellular component movement;regulation of biological process	endoplasmic reticulum;membrane	protein binding;RNA binding	Pf04156, Pf05557, Pf12128	0.973	0.946	0.909	0.908	0.965	0.984	0.943	0.939	1.015	0.994	0.97	0.985	0.957	0.914	0.987	0.958	0.887	0.896	1.022	1.009	0.964	0.94	0.916	0.899	0.978	1.009	1.004	1.009	1.009
Master Protein	P39054	Dynamin-2 OS=Mus musculus GN=Dnm2 PE=1 SV=2	Dnm2	13430	ENSMUSG00000033335	High	FALSE	56	1527	1	0	395.806	4851.54	59.3103	68.519	9	cell organization and biogenesis;metabolic process;regulation of biological process;response to stimulus;transport	cytoplasm;cytoskeleton;cytosol;endosome;Golgi;membrane;nucleus	catalytic activity;nucleotide binding;protein binding	Pf00169, Pf00350, Pf01031, Pf02212			0.794	0.877	0.879	0.924	0.924	0.832			0.887	0.936					0.744	0.745			0.991	0.919	0.917	0.879	1.079	0.947			0.886
Master Protein	G3X914	Cullin 5 OS=Mus musculus GN=Cul5 PE=3 SV=1	Cul5	75717	ENSMUSG00000032030	High	FALSE	47	609	47	0	395.251	2469.23	57.076	37.566	9	cellular component movement;cellular homeostasis;metabolic process	cytoplasm;cytosol;membrane;nucleus	catalytic activity;protein binding	Pf00888, Pf10557	0.964	0.988	0.936	0.928	0.988	0.987	0.927	0.925	0.994	1.01	0.983	0.968	0.975	0.995	0.965	0.991	0.91	0.891	1.017	1.025	0.959	0.947	0.986	0.973	0.991	1.007	1.015	1.029	1.005
Master Protein	Q3UGY8	Brefeldin A-inhibited guanine nucleotide-exchange protein 3 OS=Mus musculus GN=Arfgef3 PE=1 SV=1	D10Bwg1379e; Arfgef3	215821	ENSMUSG00000019852	High	FALSE	65	400	65	0	395.202	1516.18	36.0829	5.486	10	regulation of biological process	membrane		Pf09324	0.899	0.91	0.846	0.84	0.887	0.906	0.997	1.007	1.011	1.014	1.004	1.02	0.876	0.888	0.898	0.903	0.839	0.834	1.018	1.011	0.97	0.987	1.051	1.056	0.84	0.883	0.892	0.91	0.88
Master Protein	B2RQQ7	CDC42 binding protein kinase beta OS=Mus musculus GN=Cdc42bpb PE=2 SV=1	Cdc42bpb	217866		High	FALSE	72	551	63	0	395.097	2093.63	41.0391	8.55	12	cell organization and biogenesis;cellular component movement;metabolic process;regulation of biological process;response to stimulus;transport	cytoplasm;cytoskeleton;Golgi;membrane	catalytic activity;metal ion binding;motor activity;nucleotide binding;protein binding	Pf00069, Pf00130, Pf00261, Pf00433, Pf00769, Pf00780, Pf00786, Pf01576, Pf02463, Pf03148, Pf03962, Pf04111, Pf04156, Pf04849, Pf05276, Pf05483, Pf05557, Pf05622, Pf05667, Pf05701, Pf06008, Pf06160, Pf07321, Pf07714, Pf07888, Pf08826, Pf09321, Pf09726, Pf09728, Pf09730, Pf09731, Pf09787, Pf10174, Pf10473, Pf10498, Pf12072, Pf12128, Pf12718, Pf12795, Pf13514, Pf13851, Pf13868, Pf13870, Pf14817, Pf1…	0.966	0.96	0.882	0.917	0.966	0.949	0.916	0.937	1	1.001	0.936	0.972	0.926	0.939	0.976	0.963	0.927	0.931	1.034	1.025	0.909	0.963	0.913	0.949	0.985	0.979	1.026	1.009	1.013
Master Protein	Q6P5E4	UDP-glucose:glycoprotein glucosyltransferase 1 OS=Mus musculus GN=Uggt1 PE=1 SV=4	Uggt1	320011	ENSMUSG00000037470	High	FALSE	60	488	60	0	393.597	1895.48	49.7099	9.798	1	metabolic process	endoplasmic reticulum;organelle lumen	catalytic activity;protein binding	Pf06427	0.959	0.965	0.891	0.902	0.989	0.978	0.948	0.909	1.005	1.019	0.93	0.964	0.978	0.974	0.958	0.968	0.872	0.839	0.972	0.995	0.941	0.947	0.873	0.91	0.969	0.988	0.977	1.004	0.981
Master Protein	Q4ACU6-9	Isoform 8 of SH3 and multiple ankyrin repeat domains protein 3 OS=Mus musculus GN=Shank3	Shank3			High	FALSE	52	480	3	0	392.995	1881.3	57.6439	60.441			nucleus	DNA binding;protein binding	Pf00536, Pf02198, Pf07647			0.856					0.901			0.786							1.014			0.8		0.8
Master Protein	Q9CQV8	14-3-3 protein beta/alpha OS=Mus musculus GN=Ywhab PE=1 SV=3	Ywhab	54401	ENSMUSG00000018326	High	FALSE	30	3820	17	0	392.752	13435	89.8374	58169.9	2	cell organization and biogenesis;metabolic process;regulation of biological process;transport	cytoplasm;cytosol;membrane;nucleus	catalytic activity;protein binding	Pf00244	0.797	0.874	0.99	1.007	0.842	0.82	1.097	1.055	0.834	0.888	1.014	1.04	0.804	0.896	0.785	0.847	0.985	0.937	0.85	0.892	1.025	1.038	1.026	1.063	0.873	0.865	0.906	0.952	0.981
Master Protein	E9PWX1	Dipeptidyl aminopeptidase-like protein 6 OS=Mus musculus GN=Dpp6 PE=4 SV=1	Dpp6	13483	ENSMUSG00000061576	High	FALSE	46	1381	2	0	391.7	4948.72	53.5506	57.028	5	cell organization and biogenesis;metabolic process;regulation of biological process	cell surface;membrane	catalytic activity;protein binding	Pf00326, Pf00930	1.034	1.035	1.003	1.004	1.06	1.068	0.875	0.887	1.008	0.997	0.969	0.968	1.028	1.038	1.063	1.06	0.98	0.997	0.964	0.962	0.923	0.921	0.928	0.925	0.978	0.982	1.021	1.014	1.002
Master Protein	Q5F2D0	Putative uncharacterized protein OS=Mus musculus GN=Acsl6 PE=2 SV=1	Acsl6	216739	ENSMUSG00000020333	High	FALSE	45	809	2	0	391.205	2914.52	65.5125	129.701	11	cell proliferation;metabolic process;regulation of biological process;transport	endoplasmic reticulum;membrane;mitochondrion;nucleus	catalytic activity;nucleotide binding;protein binding	Pf00501	0.964	0.95	0.935	0.923	0.907	0.911	0.97	0.971	1.036	1.021	0.998	0.982	0.939	0.934	0.962	0.955	0.927	0.926	1.027	1.008	0.961	0.949	0.976	0.957	0.961	0.977	1.024	1.012	0.992
Master Protein	Q9DBM8	Putative uncharacterized protein OS=Mus musculus GN=Wdr1 PE=2 SV=1	Wdr1	22388		High	FALSE	39	1320	1	0	391.199	5605.05	71.9472	159.372	5	cell organization and biogenesis;regulation of biological process	cytoplasm;cytoskeleton	protein binding	Pf00400, Pf08662			1.374								1.258										1.226		1.272
Master Protein	Q3UA81	Elongation factor 1-alpha OS=Mus musculus GN=Eef1a1 PE=2 SV=1	Eef1a1	13627		High	FALSE	35	2565	18	0	390.907	9912.63	73.3766	3980.07	9	cell organization and biogenesis;metabolic process;regulation of biological process;response to stimulus	cytoplasm;cytoskeleton;cytosol;membrane;mitochondrion;nucleus	catalytic activity;nucleotide binding;protein binding;RNA binding	Pf00009, Pf03143, Pf03144	0.943	0.939	0.89	0.884	0.924	0.906	0.934	0.925	0.963	0.964	0.957	0.954	0.908	0.923	0.926	0.923	0.841	0.836	0.989	0.98	0.949	0.95	0.929	0.933	0.953	0.938	0.988	0.982	0.989
Master Protein	Q4VA93	Protein kinase C OS=Mus musculus GN=Prkca PE=2 SV=1	Prkca	18750	ENSMUSG00000050965	High	FALSE	44	1061	30	0	390.654	3740.78	62.2024	353.813	11	cell death;cell differentiation;cell organization and biogenesis;cellular component movement;cellular homeostasis;metabolic process;regulation of biological process;response to stimulus	cytoplasm;cytosol;endoplasmic reticulum;membrane;mitochondrion;nucleus	catalytic activity;metal ion binding;nucleotide binding;protein binding	Pf00069, Pf00130, Pf00168, Pf00433, Pf07714	0.953	0.949	0.967	0.956	0.964	0.968	0.942	0.932	0.919	0.908	0.992	0.99	0.903	0.906	0.976	0.957	0.987	0.977	0.919	0.905	0.948	0.959	0.982	0.996	0.909	0.919	0.97	0.956	0.965
Master Protein	P61922	4-aminobutyrate aminotransferase, mitochondrial OS=Mus musculus GN=Abat PE=1 SV=1	Abat	268860	ENSMUSG00000057880	High	FALSE	34	1251	33	0	390.234	4967.55	79	253.83	16	metabolic process;regulation of biological process;response to stimulus	mitochondrion;organelle lumen	catalytic activity;metal ion binding;protein binding	Pf00202, Pf13481	0.87	0.91	0.983	0.953	0.937	0.933	0.987	0.989	0.902	0.939	1.087	1.059	0.852	0.896	0.855	0.901	0.928	0.924	0.831	0.87	0.972	0.949	1.005	0.97	1.005	1.016	0.898	0.931	0.963
Master Protein	Q8R1X1	Acyl-CoA synthetase long-chain family member 6 OS=Mus musculus GN=Acsl6 PE=2 SV=2	Acsl6	216739	ENSMUSG00000020333	High	FALSE	45	795	2	0	388.8	2846.63	66.759	122.886	11	cell proliferation;metabolic process;regulation of biological process;transport	endoplasmic reticulum;membrane;mitochondrion;nucleus	catalytic activity;nucleotide binding;protein binding	Pf00501				0.847				0.753				0.878						0.682				0.864		0.834
Master Protein	Q91V14	Solute carrier family 12 member 5 OS=Mus musculus GN=Slc12a5 PE=1 SV=2	Slc12a5	57138	ENSMUSG00000017740	High	FALSE	46	1413	39	0	388.465	5361.92	39.2794	41.813	2	cell communication;cellular homeostasis;response to stimulus;transport	membrane	protein binding;transporter activity	Pf00324, Pf13520	1.001	1.006	0.984	0.983	1	0.992	0.915	0.919	1.025	1.025	0.957	0.972	0.957	0.971	0.984	0.988	0.947	0.939	1.03	1.033	0.986	0.993	0.97	0.97	0.99	0.989	1.03	1.032	1.049
Master Protein	E9Q8N8	Electrogenic sodium bicarbonate cotransporter 1 OS=Mus musculus GN=Slc4a4 PE=1 SV=1	Slc4a4	54403	ENSMUSG00000060961	High	FALSE	40	904	4	0	387.282	4055.38	41.042	48.417	5	transport	membrane	protein binding;transporter activity	Pf00359, Pf00955, Pf07565	0.965	0.97	0.902	0.885	0.971	0.992	0.944	0.947	1.007	1.018	1.017	1.004	0.936	0.935	0.968	0.971	0.885	0.867	0.947	0.96	0.9	0.897	0.915	0.91	1.027	1.04	1.015	1.029	0.973
Master Protein	Q9JIF7	Coatomer subunit beta OS=Mus musculus GN=Copb1 PE=1 SV=1	Copb1	70349	ENSMUSG00000030754	High	FALSE	44	492	44	0	385.334	1892.03	55.5089	40.118	7	transport	cytoplasm;Golgi;membrane	structural molecule activity	Pf01602, Pf07718, Pf14806	0.985	0.98	0.941	0.93	0.986	0.982	0.996	0.985	1.006	1.001	1.01	0.995	1.012	0.999	0.995	0.985	0.945	0.937	1.022	1.031	1	0.988	0.983	0.974	0.962	0.973	1.015	1.024	0.981
Master Protein	P08249	Malate dehydrogenase, mitochondrial OS=Mus musculus GN=Mdh2 PE=1 SV=3	Mdh2	17448	ENSMUSG00000019179	High	FALSE	37	4782	37	0	385.002	18919.7	76.9231	2753.23	5	metabolic process	membrane;mitochondrion;nucleus;organelle lumen	catalytic activity;nucleotide binding;protein binding;RNA binding	Pf00056, Pf01073, Pf01118, Pf02866, Pf13460	0.894	0.899	0.998	0.986	0.912	0.903	0.965	0.973	0.892	0.886	0.998	1.005	0.845	0.851	0.879	0.886	0.968	0.973	0.871	0.865	0.979	0.984	0.961	0.964	0.931	0.932	0.902	0.9	0.974
Master Protein	O35927	Catenin delta-2 OS=Mus musculus GN=Ctnnd2 PE=1 SV=1	Ctnnd2	18163		High	FALSE	55	521	23	0	384.945	2093.64	55.413	14.336	15	cell organization and biogenesis;development;metabolic process;regulation of biological process;response to stimulus	nucleus	protein binding	Pf00514	1.029	1.039	0.922	0.919	0.975	1.002	0.909	0.978	1.036	1.033	0.937	0.919	0.985	0.942	1.024	1.004	0.929	0.967	1.096	1.09	0.965	0.937	0.927	0.909	0.942	0.996	1.058	1.06	1.019
Master Protein	Q02357-6	Isoform 6 of Ankyrin-1 OS=Mus musculus GN=Ank1	Ank1			High	FALSE	65	407	61	0	384.777	1521.72	39.0142	5.837		regulation of biological process;response to stimulus		protein binding	Pf00023, Pf00531, Pf00791, Pf12796, Pf13606, Pf13637, Pf13857	1.022	1.044	0.962	0.951	1.029	1	0.926	0.96	1.035	1.057	0.927	0.922	1.011	1.027	1.018	1.028	0.911	0.934	1.03	1.042	0.906	0.904	0.929	0.934	1.028	1.005	1.021	1.027	1.027
Master Protein	B2RRX2	Serine/threonine-protein phosphatase OS=Mus musculus GN=Ppp3ca PE=2 SV=1	Ppp3ca	19055	ENSMUSG00000028161	High	FALSE	36	2933	2	0	384.702	11026.1	69.0979	726.895	3	cellular homeostasis;metabolic process;regulation of biological process;response to stimulus;transport	cytoplasm;cytosol;membrane;mitochondrion;nucleus	catalytic activity;metal ion binding;protein binding	Pf00149	1.023	1.05	0.976	0.964	1.027	1.018	0.871	0.89	0.961	0.98	0.91	0.921	1.02	1.057	1.049	1.048	0.928	0.941	0.964	0.993	0.913	0.92	0.911	0.922	0.951	0.915	1.004	1.031	1.014
Master Protein	F8WHL2	Coatomer subunit alpha OS=Mus musculus GN=Copa PE=1 SV=1	Copa	12847	ENSMUSG00000026553	High	FALSE	59	486	59	0	384.469	1830.34	52.0681	13.187	1	transport	cytoplasm;extracellular;Golgi;membrane	protein binding;structural molecule activity	Pf00400, Pf04053, Pf06957	0.978	0.967	0.915	0.91	0.916	0.97	0.96	0.92	1.01	1.018	0.974	0.982	0.935	0.929	1.001	0.978	0.918	0.899	1.032	1.021	0.968	0.973	0.946	0.953	0.909	0.967	1.015	1.004	0.938
Master Protein	E9Q1G8	Septin-7 OS=Mus musculus GN=Sept7 PE=1 SV=2	Sept7	235072	ENSMUSG00000001833	High	FALSE	42	1841	6	0	384.075	6844.58	82.6087	3029.27	9	cell division;cell growth;cell organization and biogenesis	chromosome;cytoplasm;cytoskeleton;membrane;nucleus	nucleotide binding;protein binding	Pf00735, Pf01926, Pf05368	0.961	0.968	0.976	0.975	0.945	0.947	0.969	0.977	1.022	1.03	1.032	1.025	0.953	0.98	0.941	0.953	0.929	0.932	1.072	1.073	0.993	1.003	0.974	0.979	1.037	1.026	1.068	1.074	1.062
Master Protein	Q8BFR5	Elongation factor Tu, mitochondrial OS=Mus musculus GN=Tufm PE=1 SV=1	Tufm	233870	ENSMUSG00000073838	High	FALSE	34	1437	33	0	383.964	5864.36	71.6814	511.481	7	metabolic process	membrane;mitochondrion	catalytic activity;nucleotide binding;RNA binding	Pf00009, Pf03143, Pf03144	1.013	0.982	0.925	0.941	1.009	0.991	0.954	0.971	1.037	1.01	0.98	0.993	1.007	0.973	0.989	0.962	0.888	0.894	1.02	1.011	0.953	0.978	0.921	0.941	1.069	1.051	1.039	1.015	1.073
Master Protein	E9Q3M9	Protein 2010300C02Rik OS=Mus musculus GN=2010300C02Rik PE=1 SV=1	2010300C02Rik	72097	ENSMUSG00000026090	High	FALSE	51	663	19	0	383.647	2448.02	53.7872	14.753	1				Pf15262	1.06	1.048	0.897	0.951	1.068	1.088	0.919	0.909	0.988	0.999	0.86	0.902	0.931	0.944	1.009	1.004	0.932	0.915	0.987	0.992	0.893	0.94	0.883	0.932	0.968	0.993	1.048	1.037	1.084
Master Protein	Q6P1B9	Bin1 protein OS=Mus musculus GN=Bin1 PE=1 SV=1	Bin1	30948	ENSMUSG00000024381	High	FALSE	37	1269	2	0	383.632	5107.85	71.0692	1667.1	18	cell differentiation;cell organization and biogenesis;development;regulation of biological process;transport	cytoplasm;membrane;nucleus	protein binding	Pf00018, Pf03114, Pf07653, Pf14604	0.875	0.948	0.768	0.755	0.808	0.86	0.852	0.857	0.912	0.951	0.815	0.816	0.796	0.848	0.965	0.953	0.8	0.766	0.946	1.063	0.849	0.832	0.91	0.861	1.084	1.068	0.877	0.947	0.968
Master Protein	Q62420	Endophilin-A1 OS=Mus musculus GN=Sh3gl2 PE=1 SV=2	Sh3gl2	20404	ENSMUSG00000028488	High	FALSE	33	2958	23	0	383.33	10952.6	81.25	16875.1	4	regulation of biological process;transport	cytoplasm;cytosol;membrane	protein binding	Pf00018, Pf03114, Pf07653, Pf10455, Pf14604	1.038	1.033	0.995	0.996	1.011	1.022	0.964	0.95	1.045	1.04	0.971	0.973	1.019	1.014	1.014	1.004	0.913	0.895	0.985	0.974	0.967	0.971	0.947	0.952	1.027	1.046	1.065	1.059	1.078
Master Protein	P18872-2	Isoform Alpha-2 of Guanine nucleotide-binding protein G(o) subunit alpha OS=Mus musculus GN=Gnao1	Gnao1	14681		High	FALSE	35	3907	3	0	382.086	13298	85.3107	8960.5	8	regulation of biological process;response to stimulus	membrane	catalytic activity;metal ion binding;nucleotide binding;protein binding;signal transducer activity	Pf00025, Pf00503	0.598	0.565	1.079	1.071	0.682	0.703	1.107	1.129	0.612	0.58	1.148	1.164	0.57	0.533	0.587	0.557	1.14	1.152	0.638	0.597	1.084	1.128	1.165	1.19	0.689	0.728	0.666	0.625	0.738
Master Protein	Q6R891	Neurabin-2 OS=Mus musculus GN=Ppp1r9b PE=1 SV=1	Ppp1r9b	217124	ENSMUSG00000038976	High	FALSE	39	824	36	0	380.894	3563.9	50.7956	134.388	11	cell differentiation;cell organization and biogenesis;cellular component movement;development;metabolic process;regulation of biological process;response to stimulus;transport	cytoplasm;cytoskeleton;membrane;nucleus	catalytic activity;enzyme regulator activity;protein binding;transporter activity	Pf00595, Pf01496, Pf04111, Pf04156, Pf05557, Pf07106, Pf07888	1.071	1.05	0.952	0.943	1.012	1.009	0.91	0.897	1.026	1.024	0.936	0.926	1.037	1.008	1.061	1.051	0.929	0.9	0.913	0.909	0.95	0.935	0.923	0.923	0.952	0.953	1.02	1.001	1.008
Master Protein	Q3TU85	Heat shock protein 1B OS=Mus musculus GN=Hspa1b PE=2 SV=1	Hspa1a; Hspa1b	193740; 15511	ENSMUSG00000091971	High	FALSE	42	1589	5	0	380.494	6496.34	81.2793	161.378	17	cell organization and biogenesis;metabolic process;regulation of biological process;response to stimulus	cytoplasm;cytosol;membrane;mitochondrion;nucleus;organelle lumen	catalytic activity;nucleotide binding;protein binding;RNA binding	Pf00012, Pf06723	1.049	1.013	0.864	0.861	1.107	1.14	0.955	0.975	0.985	0.955	0.927	0.944	1.098	1.035	1.082	1.063	0.894	0.882	0.989	0.965	0.935	0.929	0.902	0.893	0.974	1.005	1.089	1.066	1.028
Master Protein	E9PVC5	Eukaryotic translation initiation factor 4 gamma 1 OS=Mus musculus GN=Eif4g1 PE=1 SV=1	Eif4g1	208643	ENSMUSG00000045983	High	FALSE	59	681	1	0	380.378	2422.42	37.7039	17.186	16	defense response;metabolic process;regulation of biological process;response to stimulus	cytoplasm;membrane	protein binding;RNA binding	Pf00566, Pf02020, Pf02847, Pf02854		0.939						0.893		1.008				0.879		1.018		0.854		1.021								1.052
Master Protein	Q6NZJ6	Eukaryotic translation initiation factor 4 gamma 1 OS=Mus musculus GN=Eif4g1 PE=1 SV=1	Eif4g1	208643	ENSMUSG00000045983	High	FALSE	59	684	1	0	380.244	2429.25	37.5	17.186	16	defense response;metabolic process;regulation of biological process;response to stimulus	cytoplasm;membrane	protein binding;RNA binding	Pf00566, Pf02020, Pf02847, Pf02854	0.988	0.98	0.912	0.901	0.967	0.975	0.936	0.955	0.998	0.986	0.96	0.945	0.952	0.961	0.99	0.983	0.911	0.908	1.04	1.016	0.96	0.959	0.941	0.948	0.953	0.946	1.019	1.01	0.99
Master Protein	Q3UHD9	Arf-GAP with GTPase, ANK repeat and PH domain-containing protein 2 OS=Mus musculus GN=Agap2 PE=2 SV=1	Agap2; LOC105242480	216439; 105242480	ENSMUSG00000025422	High	FALSE	53	765	51	0	380.131	3081.69	58.0101	20.544	10	cell organization and biogenesis;regulation of biological process;response to stimulus;transport	cytoplasm;endosome;membrane;mitochondrion;nucleus	catalytic activity;enzyme regulator activity;metal ion binding;nucleotide binding;protein binding	Pf00023, Pf00071, Pf00169, Pf01412, Pf08477, Pf09547, Pf12796, Pf13637, Pf13857	1.021	1.034	0.963	0.97	1.086	1.074	0.931	0.935	0.976	0.984	0.95	0.964	1.013	1.026	1.007	1.028	1.05	1.051	1.074	1.098	0.938	0.953	0.932	0.948	1.01	1	1.052	1.063	1.065
Master Protein	B2RXX8	Cdc42bpa protein OS=Mus musculus GN=Cdc42bpa PE=2 SV=1	Cdc42bpa	226751		High	FALSE	64	406	56	0	379.331	1492.24	40.7044	6.979	1	cell differentiation;cell organization and biogenesis;cellular component movement;metabolic process;regulation of biological process;response to stimulus;transport	cytoplasm;cytoskeleton;extracellular	catalytic activity;metal ion binding;motor activity;nucleotide binding;protein binding;structural molecule activity	Pf00069, Pf00130, Pf00169, Pf00433, Pf00769, Pf00780, Pf01442, Pf01576, Pf02463, Pf02841, Pf03999, Pf04012, Pf04111, Pf04156, Pf05483, Pf05557, Pf05622, Pf05667, Pf05701, Pf05911, Pf06008, Pf06160, Pf06785, Pf06810, Pf07111, Pf07714, Pf07888, Pf07926, Pf08317, Pf08826, Pf09726, Pf09755, Pf10174, Pf12128, Pf12718, Pf12795, Pf13166, Pf13514, Pf13851, Pf13868, Pf13870, Pf14362, Pf14531, Pf14992, Pf1…	0.976	0.975	0.942	0.933	1.008	1	0.942	0.974	1.02	0.999	0.987	0.994	0.992	0.966	0.983	0.955	0.888	0.894	1.002	0.98	0.97	0.966	1.001	0.98	1.057	1.052	1.032	1.012	1.028
Master Protein	Q5DTM9	MKIAA4112 protein (Fragment) OS=Mus musculus GN=Ppfia2 PE=2 SV=1	Ppfia2	327814		High	FALSE	65	597	42	0	379.132	2093.14	47.0262	15.577	10	cell organization and biogenesis;cellular component movement;metabolic process;regulation of biological process	cytoplasm;cytoskeleton;Golgi	catalytic activity;motor activity;protein binding	Pf00261, Pf00536, Pf00769, Pf01576, Pf02463, Pf04111, Pf04156, Pf04163, Pf05557, Pf05622, Pf06008, Pf06160, Pf06785, Pf07647, Pf07888, Pf09726, Pf09728, Pf09731, Pf10168, Pf10174, Pf10234, Pf12072, Pf12128, Pf12718, Pf13514, Pf13851, Pf13868, Pf15070, Pf15619	1.022	1.021	0.941	0.938	1.043	1.049	0.887	0.912	0.985	0.962	0.923	0.916	1.006	1.024	1.016	1.033	0.941	0.938	0.989	0.96	0.928	0.917	0.905	0.9	0.98	0.967	1.018	1.005	1.044
Master Protein	Q61595-13	Isoform 13 of Kinectin OS=Mus musculus GN=Ktn1	Ktn1			High	FALSE	67	429	2	0	378.182	1623.59	55.7063	11.798		regulation of biological process			Pf04156, Pf05557, Pf07888, Pf12128			0.902	0.834	0.987	1.093	0.907	0.975			1.033	0.925					0.722	0.826			1.184	0.932	1.052	0.97	0.969	1.091			1.05
Master Protein	P14733	Lamin-B1 OS=Mus musculus GN=Lmnb1 PE=1 SV=3	Lmnb1	16906	ENSMUSG00000024590	High	FALSE	46	885	41	0	378	3368.22	69.2177	140.254	18	metabolic process;regulation of biological process	cytoplasm;membrane;nucleus	catalytic activity;motor activity;protein binding;structural molecule activity	Pf00038, Pf00932, Pf01576, Pf04111, Pf09726, Pf10186, Pf12128	0.986	0.993	0.927	0.922	0.959	0.956	0.953	0.97	1.078	1.077	1.017	1.027	0.978	0.98	1.004	1.004	0.945	0.947	1.072	1.083	0.973	0.985	0.948	0.951	0.966	0.96	1.018	1.011	0.994
Master Protein	Q9CPY7	Cytosol aminopeptidase OS=Mus musculus GN=Lap3 PE=1 SV=3	Lap3	66988	ENSMUSG00000039682	High	FALSE	31	844	31	0	377.691	3398.11	77.842	240.186	5	metabolic process	cytoplasm;mitochondrion;nucleus	catalytic activity;metal ion binding	Pf00883, Pf02789	0.832	0.86	0.887	0.861	0.852	0.818	0.916	0.901	0.918	0.929	0.977	0.958	0.798	0.819	0.849	0.867	0.85	0.825	0.917	0.926	0.95	0.935	0.993	0.965	0.912	0.897	0.929	0.934	0.911
Master Protein	Q80TT4	MKIAA0719 protein (Fragment) OS=Mus musculus GN=Tomm70a PE=2 SV=1	Tomm70a	28185		High	FALSE	41	990	41	0	377.673	3457.09	63.5783	296.635	16		membrane;mitochondrion	protein binding	Pf00515, Pf07719, Pf13414	0.955	0.936	1.013	1.033	0.952	0.923	0.995	0.994	0.96	0.936	1.031	1.034	0.928	0.905	0.968	0.944	1.008	1.003	0.933	0.908	1.013	1.018	0.992	0.996	0.956	0.93	0.978	0.96	0.99
Master Protein	Q69ZD1	MKIAA1699 protein (Fragment) OS=Mus musculus GN=Exoc4 PE=2 SV=1	Exoc4	20336		High	FALSE	54	527	54	0	377.441	2065.1	62.9478	19.806	6	cell communication;cell differentiation;cell organization and biogenesis;regulation of biological process;transport	cytoplasm;endosome;Golgi;membrane	protein binding	Pf04048	0.998	0.99	1.004	0.953	0.984	0.991	0.908	0.918	0.992	0.978	1.008	0.962	1.018	1.001	1.048	1.03	0.967	0.978	0.991	0.986	0.992	0.963	0.998	0.963	0.962	0.949	0.999	0.98	0.989
Master Protein	P10637-2	Isoform Tau-A of Microtubule-associated protein tau OS=Mus musculus GN=Mapt	Mapt	17762	ENSMUSG00000018411	High	FALSE	37	2155	1	0	377.438	8173.32	84.8837	6699.19	11	cell death;cell growth;cell organization and biogenesis;cellular component movement;regulation of biological process;response to stimulus;transport	cytoplasm;cytoskeleton;membrane;nucleus	protein binding	Pf00418		0.538	0.624	0.958			0.968	0.82		0.451	0.751	1.12		0.479		0.469	0.656	0.799		0.663	0.807	1.156	0.71	0.97				0.66
Master Protein	G3UYW1	WD repeat and FYVE domain-containing protein 3 OS=Mus musculus GN=Wdfy3 PE=1 SV=1	Wdfy3	72145	ENSMUSG00000043940	High	FALSE	76	351	76	0	377.127	1252.43	26.0635	2.182	5	cell communication;metabolic process;regulation of biological process;response to stimulus	cytoplasm;membrane;nucleus;vacuole	catalytic activity;metal ion binding;protein binding	Pf00400, Pf01363, Pf02138, Pf13385, Pf14844	0.972	1.003	0.934	0.932	0.979	0.977	0.929	0.921	0.989	1.022	0.983	0.963	0.959	0.975	0.988	1.022	0.91	0.902	0.984	1.002	0.944	0.953	0.946	0.951	0.957	0.959	0.993	1.007	0.971
Master Protein	Q3UCC6	Putative uncharacterized protein (Fragment) OS=Mus musculus GN=Sucla2 PE=2 SV=1	Sucla2	20916		High	FALSE	38	1746	38	0	376.831	6689.64	72.3404	639.4	14	metabolic process	mitochondrion	catalytic activity;metal ion binding;nucleotide binding	Pf00549, Pf02222, Pf02786, Pf08442, Pf13535, Pf13549	0.962	0.955	0.943	0.94	0.941	0.948	0.905	0.914	0.958	0.946	0.964	0.968	0.912	0.908	0.949	0.95	0.912	0.902	0.889	0.867	0.923	0.934	0.914	0.919	0.964	0.985	0.951	0.943	0.974
Master Protein	Q8JZQ2	AFG3-like protein 2 OS=Mus musculus GN=Afg3l2 PE=1 SV=1	Afg3l2	69597	ENSMUSG00000024527	High	FALSE	50	782	45	0	376.405	2913.43	62.3441	45.416	18	cell organization and biogenesis;metabolic process;regulation of biological process;response to stimulus;transport	membrane;mitochondrion	catalytic activity;metal ion binding;nucleotide binding	Pf00004, Pf01434, Pf05496, Pf06068, Pf06480, Pf07724, Pf07728, Pf13191, Pf13401	1.002	0.987	0.97	0.977	0.97	0.979	0.969	0.988	1.043	1.018	0.991	1.009	0.982	0.97	0.997	0.977	0.945	0.939	1.007	0.984	0.983	1.002	0.949	0.959	0.996	0.998	1.024	1	1.019
Master Protein	G5E866	Splicing factor 3B subunit 1 OS=Mus musculus GN=Sf3b1 PE=1 SV=1	Sf3b1	81898	ENSMUSG00000025982	High	FALSE	51	459	51	0	376.404	1765.97	49.2331	15.681	1	cell organization and biogenesis;metabolic process;regulation of biological process;response to stimulus	chromosome;nucleus;spliceosomal complex	DNA binding;protein binding;receptor activity;RNA binding;signal transducer activity	Pf02161, Pf08920, Pf12815, Pf13513	0.998	0.956	0.938	0.916	0.933	1.009	0.899	0.913	1.025	0.997	0.981	0.964	0.987	0.944	0.999	0.967	0.901	0.924	1.034	0.999	0.952	0.956	0.962	0.961	0.924	1	1.024	1.004	0.985
Master Protein	P68404	Protein kinase C beta type OS=Mus musculus GN=Prkcb PE=1 SV=4	Prkcb	18751	ENSMUSG00000052889	High	FALSE	42	1276	2	0	376.391	4830.93	59.9106	195.193	7	cell death;cell organization and biogenesis;cellular homeostasis;metabolic process;regulation of biological process;response to stimulus;transport	cytoplasm;cytosol;membrane;nucleus	catalytic activity;metal ion binding;nucleotide binding;protein binding	Pf00069, Pf00130, Pf00168, Pf00433, Pf07714	1.144			0.805					1.283			0.931	1.191		1.261				0.984			0.859		0.885			1.129
Master Protein	Q9JM52	Misshapen-like kinase 1 OS=Mus musculus GN=Mink1 PE=1 SV=3	Mink1	50932	ENSMUSG00000020827	High	FALSE	53	692	28	0	376.263	2532.54	42.8899	15.452	11	cell communication;cell organization and biogenesis;cellular homeostasis;development;metabolic process;regulation of biological process;response to stimulus	cytoplasm;Golgi;membrane	catalytic activity;nucleotide binding;signal transducer activity	Pf00069, Pf00780, Pf07714, Pf14531	1.119	1.142	0.871	0.858	0.936	0.95	1.008	1.045	0.919	0.922	0.844	0.851	0.9	0.899	1.109	1.126	0.865	0.887	1.155	1.19	1.099	1.079	1.077	1.061	1.063	1.102	1.146	1.165	0.94
Master Protein	Q6PDI5	Proteasome-associated protein ECM29 homolog OS=Mus musculus GN=Ecm29 PE=1 SV=3	AI314180	230249	ENSMUSG00000050812	High	FALSE	60	376	60	0	376.006	1532.07	42.8804	4.954	4	cell organization and biogenesis;metabolic process	cytoplasm;cytoskeleton;endoplasmic reticulum;endosome;membrane;nucleus;proteasome	protein binding;structural molecule activity	Pf13001	0.957	0.972	0.923	0.934	1.072	0.997	0.882	0.938	1.005	0.993	0.943	0.978	0.957	0.955	0.986	0.985	0.913	0.929	1.002	1.004	0.949	0.954	0.943	0.973	1.007	0.971	1.003	1.008	1.007
Master Protein	A7E1Z5	Electrogenic Na-bicarbonate cotransporter splice variant NBCe1-E OS=Mus musculus GN=Slc4a4 PE=1 SV=1	Slc4a4	54403	ENSMUSG00000060961	High	FALSE	39	839	3	0	375.58	3819.42	42.5234	62.096	5	transport	membrane	protein binding;transporter activity	Pf00359, Pf00955, Pf07565	1.103		0.919		0.998	1.202	0.868	0.943	1.178		1.003		1.19		1.09		0.812	0.851	1.109		1.084		1.033		1.126	1.311	1.176		1.043
Master Protein	O54991	Contactin-associated protein 1 OS=Mus musculus GN=Cntnap1 PE=2 SV=2	Cntnap1	53321	ENSMUSG00000017167	High	FALSE	44	1014	44	0	375.407	3719.06	37.5451	16.056	11	cell organization and biogenesis	membrane	protein binding	Pf00054, Pf00147, Pf00754, Pf02210	0.985	0.982	0.965	0.959	0.997	0.986	0.888	0.899	0.954	0.956	0.91	0.908	0.982	0.996	0.983	0.978	0.919	0.903	0.923	0.919	0.909	0.903	0.928	0.925	0.969	0.964	0.95	0.953	0.942
Master Protein	Q545N7	Creatine kinase, mitochondrial 1, ubiquitous, isoform CRA_a OS=Mus musculus GN=Ckmt1 PE=2 SV=1	Ckmt1	12716	ENSMUSG00000000308	High	FALSE	38	2938	34	0	375.03	12303.4	72.2488	917.254	2	metabolic process;regulation of biological process	membrane;mitochondrion	catalytic activity;nucleotide binding;protein binding	Pf00217, Pf02807	0.919	0.936	1.018	0.974	0.967	0.955	0.964	0.966	0.927	0.939	0.976	0.84	0.974	0.985	0.924	0.938	0.914	0.917	0.891	0.904	0.981	0.902	0.97	0.909	0.937	0.903	0.907	0.926	0.935
Master Protein	Q8CJ40	Rootletin OS=Mus musculus GN=Crocc PE=1 SV=2	Crocc	230872	ENSMUSG00000040860	High	FALSE	80	442	78	0	374.605	1533.16	41.7621	3.409	4	cell organization and biogenesis;metabolic process	cytoplasm;cytoskeleton;membrane	protein binding;structural molecule activity	Pf04111, Pf15035	1.056	1.07	0.943	0.918	1.034	1.038	0.76	0.744	0.892	0.869	1.017	1.003	1.038	1.06	1.061	1.077	0.953	0.928	0.779	0.761	0.967	0.944	0.934	0.919	0.999	1.007	0.869	0.857	0.824
Master Protein	E9Q1V9	Calcium/calmodulin-dependent protein kinase type II subunit delta OS=Mus musculus GN=Camk2d PE=1 SV=1	Camk2d	108058	ENSMUSG00000053819	High	FALSE	34	2468	1	0	374.568	10167.5	77.5391	799.25	3	cell growth;cell organization and biogenesis;cellular component movement;cellular homeostasis;metabolic process;regulation of biological process;response to stimulus;transport	cytoplasm;cytosol;endoplasmic reticulum;membrane;nucleus	catalytic activity;nucleotide binding;protein binding	Pf00069, Pf07714, Pf08332, Pf12680, Pf13474, Pf14534	1.005	0.955	1.024	0.908	0.888	0.918	0.978	0.975	1.129	1.154	1.041	1.042	0.933	0.882	1.003	0.962	0.962	0.948	1.227	1.244	0.95	0.964	0.9	0.917	1.116	1.112	1.323	1.366	1.148
Master Protein	O08614	Cytoskeletal protein OS=Mus musculus GN=Utrn PE=2 SV=1	Utrn	22288		High	FALSE	73	355	1	0	374.166	1267.22	26.9175	1.716	10	cell organization and biogenesis;regulation of biological process	cytoplasm;cytoskeleton;membrane	metal ion binding;protein binding	Pf00307, Pf00397, Pf00435, Pf00569, Pf09068, Pf09069, Pf11971						0.998																				0.934
Master Protein	F6WYQ5	Phospholipid-transporting ATPase IA (Fragment) OS=Mus musculus GN=Atp8a1 PE=1 SV=1	Atp8a1		ENSMUSG00000037685	High	FALSE	53	838	1	0	373.387	3085.95	41.6165	15.802	5			metal ion binding;nucleotide binding	Pf00122, Pf13246				0.73	1.229	0.934						0.828										0.865		0.841	1.178	0.973			1.2
Master Protein	Q3TW51	Putative uncharacterized protein OS=Mus musculus GN=Snd1 PE=2 SV=1	Snd1	56463		High	FALSE	49	765	49	0	373.296	3026.8	57.8022	26.123	6	cell differentiation;metabolic process;regulation of biological process	cytoplasm;membrane;mitochondrion;nucleus	catalytic activity;protein binding;RNA binding	Pf00565, Pf00567	0.932	0.955	0.956	0.928	0.986	0.953	0.968	0.995	0.942	0.975	1	0.983	0.898	0.928	0.936	0.962	0.974	0.959	0.964	0.997	1.005	0.987	0.996	0.977	0.963	0.939	0.943	0.97	0.993
Master Protein	G3X9J4	Protein 2310035C23Rik OS=Mus musculus GN=2310035C23Rik PE=1 SV=1	2310035C23Rik	227446	ENSMUSG00000026319	High	FALSE	49	477	2	0	373.107	1970.94	51.9737	15.618	1			protein binding		0.962	0.963	0.933	0.961	1.007	0.988	0.94	0.924	0.956	0.932	0.965	0.991	0.93	0.932	0.942	0.935	0.936	0.93	0.966	0.943	0.957	0.984	0.954	0.972	0.989	0.985	0.984	0.954	1.008
Master Protein	Q6ZQ77	MKIAA0655 protein (Fragment) OS=Mus musculus GN=Hip1r PE=2 SV=1	Hip1r	29816		High	FALSE	61	464	59	0	372.735	1795.44	57.4331	13.251	5	cell death;cell organization and biogenesis;metabolic process;regulation of biological process;transport	cytoplasm;cytoskeleton;membrane	catalytic activity;motor activity;protein binding	Pf01417, Pf01576, Pf01608, Pf04111, Pf05262, Pf06160, Pf07651, Pf07888, Pf10186, Pf12128	0.964	0.989	0.916	0.943	0.944	0.963	0.908	0.888	0.995	1.026	0.941	0.985	0.929	0.946	0.988	0.998	0.877	0.869	1.061	1.104	0.963	0.987	0.942	0.973	1	1.04	1.035	1.05	1.039
Master Protein	Q3UDU4	L-lactate dehydrogenase OS=Mus musculus GN=Ldha PE=2 SV=1	Ldha	16828		High	FALSE	32	1702	1	0	372.047	6288.72	80	3161.28	7	cell communication;metabolic process;response to stimulus	cytoplasm;cytosol;membrane;mitochondrion;nucleus	catalytic activity;protein binding	Pf00056, Pf02866		1.268				1.215				1.468				1.314		1.074				1.509						1.293		1.595
Master Protein	Q8VD37-6	Isoform 6 of SH3-containing GRB2-like protein 3-interacting protein 1 OS=Mus musculus GN=Sgip1	Sgip1	73094		High	FALSE	41	710	41	0	371.942	3071.99	62.8806	51.166	4	cell organization and biogenesis;regulation of biological process;transport	cytoplasm;membrane	protein binding	Pf00928, Pf10291	1.018	1.033	1.01	1.03	1.05	1.042	0.938	0.937	1.006	1.016	0.969	0.958	1.02	1.041	1.016	1.012	0.974	0.969	1.041	1.063	0.97	0.986	0.962	0.968	1.024	1.033	1.051	1.077	1.037
Master Protein	Q69ZN0	MKIAA1258 protein (Fragment) OS=Mus musculus GN=Gda PE=2 SV=1	Gda	14544		High	FALSE	35	1473	34	0	371.891	6004.54	78.4394	379.755	19	metabolic process;regulation of biological process		catalytic activity;metal ion binding;protein binding	Pf01979, Pf13147	0.957	0.939	0.987	0.966	0.954	0.938	0.965	0.963	1.005	0.983	1.038	1.027	0.947	0.94	1.013	0.98	0.962	0.941	1.049	1.02	1.007	1	1.01	1.002	1.001	0.981	1.107	1.066	1.021
Master Protein	Q3TXS7	26S proteasome non-ATPase regulatory subunit 1 OS=Mus musculus GN=Psmd1 PE=1 SV=1	Psmd1	70247	ENSMUSG00000026229	High	FALSE	45	614	45	0	371.857	2469.97	54.1448	34.112	1	metabolic process;regulation of biological process	membrane;nucleus;proteasome	catalytic activity;enzyme regulator activity;protein binding	Pf01851, Pf13513, Pf13646	1.021	1.006	0.966	0.941	0.986	0.962	0.948	0.963	1.013	1.025	0.971	0.963	0.976	0.989	1.023	1.017	0.906	0.936	1.032	1.033	0.943	0.935	0.945	0.941	0.986	0.968	1.026	1.03	1.032
Master Protein	Q91WD5	NADH dehydrogenase [ubiquinone] iron-sulfur protein 2, mitochondrial OS=Mus musculus GN=Ndufs2 PE=1 SV=1	Ndufs2	226646	ENSMUSG00000013593	High	FALSE	25	1800	25	0	371.602	7081.21	70.8423	1303.32	1	metabolic process;response to stimulus;transport	membrane;mitochondrion	catalytic activity;metal ion binding;nucleotide binding;protein binding	Pf00346	0.95	0.923	0.936	0.918	0.991	0.972	0.966	0.994	0.968	0.935	0.992	0.976	0.953	0.922	0.953	0.928	0.931	0.944	0.961	0.924	0.951	0.939	0.938	0.925	1.03	1.013	1.01	0.983	1.037
Master Protein	Q5DTG0	ATPase, aminophospholipid transporter (APLT), class I, type 8A, member 1, isoform CRA_b (Fragment) OS=Mus musculus GN=Atp8a1 PE=2 SV=1	Atp8a1	11980		High	FALSE	53	855	1	0	371.602	3139.97	40.3347	14.552	5	cell organization and biogenesis;metabolic process;regulation of biological process;response to stimulus;transport	endoplasmic reticulum;Golgi;membrane	catalytic activity;metal ion binding;nucleotide binding;protein binding;transporter activity	Pf00122, Pf13246	0.997	1.002	0.969	0.954	1.001	1.013	0.9	0.92	1.002	0.978	0.962	0.951	0.993	0.991	1.029	1.025	0.949	0.976	0.989	0.97	0.925	0.915	0.921	0.91	0.969	0.991	1.037	1.038	1.023
Master Protein	E9QM90	Protein 2310035C23Rik OS=Mus musculus GN=2310035C23Rik PE=1 SV=1	2310035C23Rik	227446	ENSMUSG00000026319	High	FALSE	48	487	1	0	370.065	2006.55	52.2651	16.475	1			protein binding		1.039	1.029	0.934	0.868	0.983	0.96	0.999	0.953	1.109	1.019	0.942	0.896	0.896	0.919	1.002	1	0.951	0.871	1.064	0.982	0.911	0.937	0.964	0.912	1.05	0.997	1.089	1.057	1.083
Master Protein	Q91VA7	Isocitrate dehydrogenase 3 (NAD+) beta OS=Mus musculus GN=Idh3b PE=2 SV=1	Idh3b	170718	ENSMUSG00000027406	High	FALSE	26	2024	25	0	369.032	7266.22	60.9375	2871.99	2	metabolic process	mitochondrion;nucleus	catalytic activity;metal ion binding;nucleotide binding	Pf00180	1.003	1.004	0.959	0.944	0.955	0.984	0.921	0.927	0.993	0.981	0.96	0.954	0.946	0.954	0.989	0.985	0.919	0.908	0.951	0.946	0.945	0.943	0.947	0.938	0.966	0.987	0.972	0.97	1.002
Master Protein	D4AFX7	Receptor mediated endocytosis-8 OS=Mus musculus GN=Dnajc13 PE=2 SV=1	Dnajc13	235567	ENSMUSG00000032560	High	FALSE	64	327	64	0	368.624	1284.22	35.5872	3.81	9	cell differentiation;cell organization and biogenesis;regulation of biological process	cytoplasm;membrane	protein binding	Pf00226, Pf14237	0.995	1.013	0.921	0.892	1.023	1.026	0.904	0.894	1.016	1.01	0.925	0.951	1.032	1.058	0.999	1.01	0.907	0.878	0.998	1.012	0.903	0.937	0.905	0.913	1.027	1.021	1.026	1.019	1.017
Master Protein	P11983-2	Isoform 2 of T-complex protein 1 subunit alpha OS=Mus musculus GN=Tcp1	Tcp1	21454	ENSMUSG00000068039	High	FALSE	34	815	1	0	368.413	3192.72	77.9093	272.842	17	metabolic process;regulation of biological process;transport	cytoplasm;cytoskeleton;Golgi	nucleotide binding;protein binding;RNA binding	Pf00118	1.094	0.998	0.891	0.918	1.016	1.04		0.88	1.085	0.985	1.003	0.939	1.149	1.04	1.135	0.943		0.843	1.029	0.959	0.919	0.947	0.866	1.034	1.041	1.049	1.122	0.964	1.062
Master Protein	Q5SWZ5	Myosin phosphatase Rho-interacting protein OS=Mus musculus GN=Mprip PE=1 SV=1	Mprip	26936	ENSMUSG00000005417	High	FALSE	73	334	37	0	367.159	1289.89	39.7091	3.362	11	metabolic process;regulation of biological process	cytoplasm;cytoskeleton;Golgi	catalytic activity;motor activity;protein binding	Pf00169, Pf01576, Pf02463, Pf04111, Pf05622, Pf07888, Pf09726, Pf09731, Pf12128, Pf13166, Pf13514, Pf14915, Pf15070, Pf15619	0.999	0.995	0.918	0.89	0.97	0.981	0.878	0.917	1.046	1.007	0.93	0.931	0.978	0.992	1.002	1.004	0.851	0.87	1.023	0.984	0.932	0.935	0.887	0.891	1.007	1.017	1.031	1.016	1.021
Master Protein	A2AEW8	GRIP1-associated protein 1 OS=Mus musculus GN=Gripap1 PE=1 SV=1	Gripap1	54645	ENSMUSG00000031153	High	FALSE	56	496	26	0	366.995	2037.38	69.773	24.514	X	metabolic process;regulation of biological process	endosome	catalytic activity;motor activity;protein binding	Pf01576, Pf04111, Pf07888, Pf09726, Pf10186, Pf12128	1.01	1.012	0.922	0.915	1.003	1.003	0.906	0.92	1.02	1.015	0.925	0.926	0.986	1.009	1.022	1.023	0.892	0.896	1.067	1.046	0.923	0.948	0.912	0.916	1.003	1.011	1.052	1.04	1.036
Master Protein	Q3TI05	Chaperonin containing Tcp1, subunit 6a (Zeta) OS=Mus musculus GN=Cct6a PE=2 SV=1	Cct6a	12466		High	FALSE	38	1205	33	0	366.918	4910.43	67.7966	409.113	5	metabolic process;regulation of biological process;transport	cytoplasm;membrane	nucleotide binding;protein binding;RNA binding	Pf00118, Pf05504	0.984	0.994	0.95	0.945	0.916	0.97	0.948	0.959	1.011	1.01	1.008	1.004	0.951	0.966	0.996	0.998	0.919	0.91	0.975	0.984	0.96	0.966	0.983	0.983	0.964	1.005	1.007	1.019	0.969
Master Protein	Q9D0K2	Succinyl-CoA:3-ketoacid coenzyme A transferase 1, mitochondrial OS=Mus musculus GN=Oxct1 PE=1 SV=1	Oxct1	67041	ENSMUSG00000022186	High	FALSE	31	1743	31	0	365.795	6743.66	63.4615	1736.8	15	metabolic process;regulation of biological process;response to stimulus	mitochondrion;organelle lumen	catalytic activity;protein binding	Pf01144	0.987	0.993	0.954	0.926	0.969	0.97	0.863	0.868	1.022	1.031	1.002	0.96	0.951	0.97	0.984	0.981	0.902	0.898	0.991	1.004	0.959	0.931	0.95	0.926	0.97	0.975	1.004	1.014	0.994
Master Protein	Q9DB77	Cytochrome b-c1 complex subunit 2, mitochondrial OS=Mus musculus GN=Uqcrc2 PE=1 SV=1	Uqcrc2	67003	ENSMUSG00000030884	High	FALSE	33	2249	33	0	365.794	9135.88	68.8742	1201.26	7	metabolic process;transport	membrane;mitochondrion	catalytic activity;metal ion binding;protein binding	Pf00675, Pf05193	1.006	1.013	0.931	0.917	0.994	0.978	0.893	0.895	1.003	1.005	0.939	0.936	0.979	0.982	0.993	0.998	0.903	0.899	0.969	0.968	0.909	0.908	0.905	0.898	1	0.993	0.999	0.998	1.024
Master Protein	Q7TQF7	Amphiphysin OS=Mus musculus GN=Amph PE=1 SV=1	Amph	218038	ENSMUSG00000021314	High	FALSE	38	2083	36	0	365.389	8167.23	53.3528	440.734	13	regulation of biological process;response to stimulus;transport	cytoplasm;cytoskeleton;cytosol;membrane	protein binding	Pf00018, Pf03114, Pf14604	1.016	1.015	0.959	0.959	0.998	1.001	0.92	0.932	0.996	0.997	0.929	0.933	1.012	1.013	1	1.004	0.906	0.906	1.016	1.018	0.956	0.962	0.942	0.951	0.966	0.978	1.037	1.04	1.043
Master Protein	Q6P9K9	Neurexin-3 OS=Mus musculus GN=Nrxn3 PE=1 SV=2	Nrxn3	18191	ENSMUSG00000066392	High	FALSE	46	678	1	0	365.199	2487.09	37.3647	11.263	12	cell communication;cell organization and biogenesis;regulation of biological process;response to stimulus;transport	membrane	metal ion binding;protein binding	Pf00008, Pf00054, Pf02210, Pf13385	0.963	0.997	0.93	0.941	1.004	1.01	0.977	0.94	0.99	1.018	0.928	0.968	0.966	1.009	1.002	1.03	0.964	0.915	0.965	0.982	0.921	0.945	0.889	0.934	0.992	0.999	0.974	0.995	1.011
Master Protein	Q7TNB5	Glutamate receptor 1 OS=Mus musculus GN=Gria1 PE=2 SV=1	Gria1	14799	ENSMUSG00000020524	High	FALSE	43	1253	1	0	365.006	4517.13	45.645	39.842	11	cell communication;metabolic process;regulation of biological process;response to stimulus;transport	cell surface;cytosol;endoplasmic reticulum;endosome;membrane	protein binding;receptor activity;signal transducer activity;transporter activity	Pf00060, Pf00497, Pf01094, Pf10613	1.077	1.124	1.036	1.046	1.139	1.127	0.876	0.89	0.904	0.917	0.924	0.934	1.059	1.108	1.07	1.104	1.072	1.057	0.895	0.901	0.923	0.937	0.922	0.936	0.929	0.926	0.94	0.956	1.004
Master Protein	Q80TZ3	Putative tyrosine-protein phosphatase auxilin OS=Mus musculus GN=Dnajc6 PE=2 SV=2	Dnajc6	72685	ENSMUSG00000028528	High	FALSE	41	754	2	0	363.19	2841.84	52.3454	99	4	cell organization and biogenesis;metabolic process;regulation of biological process		catalytic activity;protein binding	Pf00226, Pf10409	0.939	0.97	0.99	0.982	0.96	0.958	0.98	1.006	0.963	0.975	1.012	1.026	0.904	0.945	0.924	0.97	0.944	0.952	0.938	0.942	0.99	0.989	0.968	0.975	0.959	0.96	0.969	0.985	1.023
Master Protein	Q3TWN5	Putative uncharacterized protein OS=Mus musculus GN=Hnrnpu PE=2 SV=1	Hnrnpu	51810		High	FALSE	44	1203	3	0	363.15	4243.99	50.625	99	1	cell differentiation;metabolic process;regulation of biological process;response to stimulus	cytoplasm;membrane;nucleus;spliceosomal complex	DNA binding;nucleotide binding;protein binding;RNA binding	Pf00622, Pf13671	0.949	0.971	1.01	0.985	0.901	0.921	1.025	1.024	0.978	0.997	1.091	1.079	0.894	0.917	0.941	0.963	1.026	1.029	1.021	1.043	1.042	1.033	1.04	1.035	0.919	0.945	0.99	1.006	0.98
Master Protein	Q80X90	Filamin-B OS=Mus musculus GN=Flnb PE=1 SV=3	Flnb	286940	ENSMUSG00000025278	High	FALSE	70	351	60	0	362.388	1299.35	32.2829	2.728	14	cell differentiation;cell organization and biogenesis	cytoplasm;cytoskeleton;membrane	protein binding;RNA binding	Pf00307, Pf00630	0.863	0.879	0.797	0.783	0.865	0.893	0.872	0.871	0.946	0.977	0.896	0.895	0.834	0.853	0.901	0.893	0.836	0.836	0.918	0.928	0.863	0.862	0.828	0.818	0.854	0.901	0.985	1.017	0.931
Master Protein	Q6ZQ56	MKIAA0743 protein (Fragment) OS=Mus musculus GN=mKIAA0743 PE=4 SV=1	Nrxn3	18191		High	FALSE	46	676	2	0	361.8	2475.51	47.6309	20.288	12	cell communication;cell organization and biogenesis;regulation of biological process;transport	membrane	metal ion binding;protein binding	Pf00054, Pf02210, Pf13385	0.988		1.05	0.921	1.048	0.962	0.956	1.18	0.979		1.218	0.811	0.795		1.006		0.937	1.265	0.944		1.189	1.008	1.192	1.018	0.932	0.966	0.882		0.983
Master Protein	G5E884	Serine/threonine-protein kinase PAK 1 OS=Mus musculus GN=Pak1 PE=1 SV=1	Pak1	18479	ENSMUSG00000030774	High	FALSE	34	1008	20	0	361.54	3640.59	74.8162	661.87	7	cell death;cell organization and biogenesis;cellular component movement;metabolic process;regulation of biological process;response to stimulus;transport	cytoplasm;cytosol;Golgi;membrane;nucleus	catalytic activity;nucleotide binding;protein binding	Pf00069, Pf00786, Pf07714, Pf14531	1.01	0.984	0.953	0.947	0.954	0.966	0.995	1.029	1.038	1.01	1.021	1.023	0.996	0.976	1.027	0.98	0.924	0.955	1.068	1.05	0.99	1	0.96	0.956	1.006	1.017	1.105	1.083	1.04
Master Protein	F6VW30	14-3-3 protein theta (Fragment) OS=Mus musculus GN=Ywhaq PE=3 SV=1	Ywhaq		ENSMUSG00000076432	High	FALSE	32	3051	25	0	361.413	10885.4	70.6271	3510.19	12			protein binding	Pf00244	0.638	0.673	1.096	1.102	0.742	0.749	1.105	1.166	0.682	0.716	1.147	1.163	0.609	0.649	0.63	0.666	1.026	1.066	0.7	0.733	1.118	1.141	1.168	1.18	0.786	0.814	0.768	0.793	0.934
Master Protein	P58871	182 kDa tankyrase-1-binding protein OS=Mus musculus GN=Tnks1bp1 PE=1 SV=2	Tnks1bp1	228140	ENSMUSG00000033955	High	FALSE	61	388	1	0	361.403	1481.15	46.8605	6.72	2		chromosome;cytoplasm;cytoskeleton;membrane;nucleus		Pf15327	0.754		0.701	0.812	0.912	0.794	0.775	0.792	0.724		0.806	0.879	0.259		0.64		0.882	1.045	0.959		1.143	0.978	0.787	0.896	0.816	0.758	0.931		1.482
Master Protein	E9PUC5	PH and SEC7 domain-containing protein 3 OS=Mus musculus GN=Psd3 PE=1 SV=1	Psd3	234353	ENSMUSG00000030465	High	FALSE	45	1068	1	0	361.023	4029.74	76.0638	1267.96	8	regulation of biological process;response to stimulus	membrane	protein binding	Pf00169, Pf15410	0.99	1.019	1	1.064	0.949	0.947	1.092	1.151	1.076	1.064	0.998	1.059	0.871	0.944	0.908	0.943	0.983	1.052	1.153	1.127	1.024	1.119	1.036	1.133	0.987	1.028	1.104	1.092	1.132
Master Protein	Q8C290	Putative uncharacterized protein OS=Mus musculus GN=Hnrnpu PE=2 SV=1	Hnrnpu	51810		High	FALSE	44	1217	3	0	360.904	4353.66	50.625	99	1	cell differentiation;metabolic process;regulation of biological process;response to stimulus	cytoplasm;membrane;nucleus;spliceosomal complex	DNA binding;nucleotide binding;protein binding;RNA binding	Pf00622, Pf13671	0.957	0.966	1.03	0.958	0.991	0.988	0.912	0.847	1.056	1.054	1.098	1.001	0.934	0.95	0.97	0.953	0.915	0.86	1.097	1.078	1.082	0.982	1.066	0.97	1	1.004	1.053	1.055	1.045
Master Protein	G3X9V4	Glutamate receptor ionotropic, NMDA 2B OS=Mus musculus GN=Grin2b PE=1 SV=1	Grin2b	14812	ENSMUSG00000030209	High	FALSE	52	538	48	0	360.826	1977.05	42.915	14.753	6	cell communication;cell organization and biogenesis;defense response;regulation of biological process;response to stimulus;transport	cell surface;membrane	metal ion binding;protein binding;receptor activity;signal transducer activity;transporter activity	Pf00060, Pf00497, Pf01094, Pf10565, Pf10613	1.029	0.996	1.022	0.98	1.046	1.028	0.921	0.881	0.994	0.964	0.97	0.935	0.987	0.958	1.058	1.019	1.008	0.995	0.996	0.985	0.971	0.941	0.948	0.904	0.937	0.931	0.994	0.979	1.009
Master Protein	E9Q035	Protein Gm20425 OS=Mus musculus GN=Gm20425 PE=4 SV=1	Gm20425		ENSMUSG00000090639	High	FALSE	47	514	11	0	360.377	1924.03	49.591	19.251	9	regulation of biological process;response to stimulus	extracellular;membrane	nucleotide binding	Pf00009, Pf00025, Pf00405, Pf01926, Pf09439, Pf12974	0.931	0.991	1.001	1.01	0.994	0.991	0.939	0.944	0.874	0.925	0.917	0.922	0.962	1.029	0.948	1.005	1.028	0.997	0.84	0.906	0.944	0.957	0.913	0.934	0.907	0.906	0.849	0.9	0.886
Master Protein	O35098	Dihydropyrimidinase-related protein 4 OS=Mus musculus GN=Dpysl4 PE=1 SV=1	Dpysl4	26757		High	FALSE	33	1688	22	0	360.16	6135.83	76.049	168.267	7	cell death;cellular component movement;metabolic process	cytoplasm	catalytic activity;protein binding	Pf01979, Pf13147, Pf13594	1.009	1.009	0.92	0.89	0.97	0.969	0.885	0.882	1.016	1.017	0.929	0.916	0.973	0.988	1.024	1.018	0.886	0.882	1.058	1.052	0.935	0.931	0.946	0.925	0.977	0.986	1.012	1.016	0.976
Master Protein	Q80XI3-3	Isoform 3 of Eukaryotic translation initiation factor 4 gamma 3 OS=Mus musculus GN=Eif4g3	Eif4g3			High	FALSE	70	482	2	0	359.45	1680.68	46.7925	8.12				protein binding;RNA binding	Pf02020, Pf02847, Pf02854	1.045	1.026	0.948	0.918	1.021	0.989	0.949	0.956	1.033	1.017	0.967	0.943	0.995	0.978	1.017	1.002	0.933	0.929	1.063	1.064	0.957	0.948	0.942	0.939	1.024	0.995	1.044	1.021	1.069
Master Protein	Q6P5F9	Exportin-1 OS=Mus musculus GN=Xpo1 PE=1 SV=1	Xpo1	103573	ENSMUSG00000020290	High	FALSE	40	613	40	0	359.319	2542.5	49.6732	23.538	11	regulation of biological process;response to stimulus;transport	chromosome;cytoplasm;membrane;nucleus	protein binding;RNA binding;transporter activity	Pf03810, Pf08389, Pf08767	0.929	0.954	0.97	0.96	0.967	0.964	0.936	0.936	0.938	0.948	0.997	0.99	0.954	0.986	0.944	0.957	0.917	0.918	0.938	0.953	0.998	0.976	0.983	0.981	0.978	0.979	0.967	0.977	0.985
Master Protein	P63328-2	Isoform 2 of Serine/threonine-protein phosphatase 2B catalytic subunit alpha isoform OS=Mus musculus GN=Ppp3ca	Ppp3ca	19055	ENSMUSG00000028161	High	FALSE	35	2787	1	0	359.129	10128.4	68.4932	528.832	3	cellular homeostasis;metabolic process;regulation of biological process;response to stimulus;transport	cytoplasm;cytosol;membrane;mitochondrion;nucleus	catalytic activity;metal ion binding;protein binding	Pf00149	1.089	1.028	0.932	0.902	1.108	1.059	1.028	0.821	0.957	0.929	0.888	0.944	1.153	1.075	1.113	1.065	1.142	0.928	0.928	0.94	0.833	0.924	0.9	1.041	1.04	0.928	1.041	1.033	1.051
Master Protein	Q6ZQ84	MKIAA0617 protein (Fragment) OS=Mus musculus GN=mKIAA0617 PE=3 SV=1	Cul3	26554		High	FALSE	49	727	48	0	358.815	2717.8	56.8182	49.802	1	cell death;cell division;cell organization and biogenesis;cellular component movement;metabolic process;regulation of biological process;response to stimulus;transport	cytoplasm;Golgi;membrane;nucleus	catalytic activity;protein binding	Pf00888, Pf10557	0.965	0.968	0.933	0.926	0.983	0.959	0.912	0.931	0.984	0.998	0.973	0.975	0.962	0.962	0.989	0.971	0.914	0.926	0.961	0.981	0.957	0.974	0.951	0.962	0.997	0.977	1.001	1.02	1.023
Master Protein	Q5DQR4	Syntaxin-binding protein 5-like OS=Mus musculus GN=Stxbp5l PE=2 SV=1	Stxbp5l	207227	ENSMUSG00000022829	High	FALSE	44	555	10	0	358.649	2092.86	50.8017	32.672	16	regulation of biological process;transport	cytoplasm;membrane	enzyme regulator activity;protein binding	Pf00957, Pf08366	1.027	1.023	0.999	0.999	1.055	1.003	0.94	0.93	1.006	1.001	0.957	0.984	1.035	1.002	1.071	1.046	0.995	1.001	0.991	0.979	0.957	0.972	0.947	0.975	0.999	0.97	1.003	1.008	1.037
Master Protein	Q497P1	Syntaxin 1A (Brain) OS=Mus musculus GN=Stx1a PE=2 SV=1	Stx1a	20907	ENSMUSG00000007207	High	FALSE	30	1480	26	0	358.574	5910.23	75	12914.5	5	cell organization and biogenesis;regulation of biological process;response to stimulus;transport	membrane	protein binding	Pf00804, Pf05739, Pf14523	1.013	1.02	0.974	0.984	0.991	0.988	0.904	0.916	1.108	1.123	0.944	0.972	1.013	1.025	1.017	1.016	0.929	0.923	1.268	1.299	1.003	1.029	0.972	1	1.083	1.082	1.152	1.176	1.104
Master Protein	B9EKJ7	Tankyrase 1 binding protein 1 OS=Mus musculus GN=Tnks1bp1 PE=2 SV=1	Tnks1bp1	228140		High	FALSE	61	383	1	0	358.467	1459.55	46.8605	6.523	2		chromosome;cytoplasm;cytoskeleton;membrane;nucleus		Pf15327	1.026	1.054	1.011	0.979	0.994	1.023	0.963	0.966	0.994	0.992	0.951	0.925	0.977	0.97	0.988	1.001	0.926	0.914	1.043	1.074	1.038	1.034	0.991	0.959	0.942	0.997	1.056	1.067	1.039
Master Protein	Q80XI3-4	Isoform 4 of Eukaryotic translation initiation factor 4 gamma 3 OS=Mus musculus GN=Eif4g3	Eif4g3			High	FALSE	69	481	1	0	357.046	1679.57	46.4512	8.319				protein binding;RNA binding	Pf02020, Pf02847, Pf02854		0.897	0.942		0.842		1.256	1.132		1.123	1.005			1.244		0.703	1.042	0.919		1.335	1.187		1.292		0.947			1.113	0.834
Master Protein	Q3V3R1	Monofunctional C1-tetrahydrofolate synthase, mitochondrial OS=Mus musculus GN=Mthfd1l PE=1 SV=2	Mthfd1l	270685	ENSMUSG00000040675	High	FALSE	47	520	46	0	356.55	2050.59	54.9642	23.92	10	metabolic process	cytosol;membrane;mitochondrion	catalytic activity;nucleotide binding;protein binding	Pf00763, Pf01268, Pf02882	1.021	1.033	1.069	1.072	1.044	1.018	0.924	0.941	1.03	1.042	0.895	0.91	0.999	1.017	0.972	0.977	1.045	1.037	1.025	1.052	0.957	0.975	1.012	1.034	1.024	1.028	0.935	0.964	0.984
Master Protein	P11531	Dystrophin OS=Mus musculus GN=Dmd PE=1 SV=3	Dmd	13405	ENSMUSG00000045103	High	FALSE	70	373	65	0	356.012	1389.42	23.4367	1.402	X	cell organization and biogenesis;cellular homeostasis;metabolic process;regulation of biological process;response to stimulus	cell surface;cytoplasm;cytoskeleton;membrane;nucleus	metal ion binding;protein binding;structural molecule activity	Pf00307, Pf00397, Pf00435, Pf00569, Pf02463, Pf09068, Pf09069, Pf11971	1.003	1.002	0.988	0.928	1.01	0.993	0.895	0.89	1.011	1.008	0.914	0.892	1.026	1.017	0.993	0.994	0.911	0.912	1	0.996	0.937	0.93	0.903	0.899	0.978	0.983	1.016	1.024	0.987
Master Protein	Q5SYD0	Unconventional myosin-Id OS=Mus musculus GN=Myo1d PE=1 SV=1	Myo1d	338367	ENSMUSG00000035441	High	FALSE	58	512	56	0	355.956	1921.27	59.0457	14.37	11	metabolic process;regulation of biological process;transport	cytosol;endoplasmic reticulum;endosome;membrane	catalytic activity;motor activity;nucleotide binding;protein binding	Pf00063, Pf06017	0.877	0.883	0.855	0.848	0.898	0.893	0.89	0.918	0.969	0.951	0.865	0.871	0.837	0.846	0.898	0.895	0.786	0.793	0.914	0.908	0.815	0.835	0.913	0.928	1.024	1.024	0.917	0.919	0.923
Master Protein	P60879	Synaptosomal-associated protein 25 OS=Mus musculus GN=Snap25 PE=1 SV=1	Snap25	20614	ENSMUSG00000027273	High	FALSE	30	4143	6	0	355.366	14971.1	83.0097	215442	2	cell organization and biogenesis;regulation of biological process;response to stimulus;transport	cytoplasm;cytoskeleton;cytosol;endosome;membrane	protein binding;transporter activity	Pf00835, Pf05739	1.014	1.012	0.953	0.946	0.995	1.006	0.948	0.949	1.02	1.015	0.953	0.964	1.013	1.019	1.009	1.008	0.912	0.911	1.046	1.04	0.946	0.951	0.941	0.948	0.994	0.999	1.048	1.043	1.011
Master Protein	Q6A0E3	MKIAA0031 protein (Fragment) OS=Mus musculus GN=Eftud2 PE=2 SV=1	Eftud2	20624		High	FALSE	44	438	43	0	354.239	1758.28	61.8852	19.991	11	metabolic process	cytoplasm;membrane;nucleus;spliceosomal complex	catalytic activity;nucleotide binding;protein binding;RNA binding	Pf00009, Pf00679, Pf03144, Pf03764, Pf14492	1.012	0.989	0.913	0.915	0.999	0.984	0.881	0.896	1.025	1.011	0.971	0.965	1.023	0.991	1.014	0.995	0.888	0.877	1.022	1.03	0.937	0.945	0.963	0.945	0.968	0.965	1.027	1.013	0.985
Master Protein	E9QKE4	Rab3 GTPase-activating protein non-catalytic subunit OS=Mus musculus GN=Rab3gap2 PE=1 SV=1	Rab3gap2	98732	ENSMUSG00000039318	High	FALSE	53	557	2	0	354.177	2040	41.4564	14.948	1	regulation of biological process	cytoplasm;membrane	enzyme regulator activity;protein binding	Pf14655, Pf14656	1.015	1.024	0.957	0.944	0.972	0.994	0.927	0.948	1.036	1.031	0.986	0.975	0.96	0.954	1.017	1.02	0.923	0.924	1.018	1.011	0.948	0.939	0.945	0.948	0.975	0.998	1.051	1.048	1.014
Master Protein	Q80TZ3-3	Isoform 3 of Putative tyrosine-protein phosphatase auxilin OS=Mus musculus GN=Dnajc6	Dnajc6	72685	ENSMUSG00000028528	High	FALSE	40	750	1	0	353.937	2829.17	48.1405	72.053	4	cell organization and biogenesis;regulation of biological process		catalytic activity;protein binding	Pf00226, Pf10409			1.054								1.021										0.96		1.037
Master Protein	Q99PU5	Long-chain-fatty-acid--CoA ligase ACSBG1 OS=Mus musculus GN=Acsbg1 PE=1 SV=1	Acsbg1	94180	ENSMUSG00000032281	High	FALSE	33	881	33	0	353.884	3634.9	49.5146	105.247	9	metabolic process;response to stimulus	cytoplasm;endoplasmic reticulum;Golgi	catalytic activity;nucleotide binding	Pf00501	0.963	0.958	0.908	0.89	0.971	0.966	0.904	0.908	1.019	1.007	0.949	0.962	0.943	0.944	0.967	0.964	0.866	0.855	1.019	1.012	0.908	0.914	0.929	0.922	0.973	0.974	1.026	1.017	1.001
Master Protein	E9PV45	Ubiquitin carboxyl-terminal hydrolase OS=Mus musculus GN=Usp24 PE=1 SV=1	Usp24		ENSMUSG00000028514	High	FALSE	60	361	60	0	353.835	1465.66	27.9221	2.551	4	metabolic process		catalytic activity;protein binding	Pf00443, Pf13423	0.934	0.928	0.892	0.887	0.93	0.958	0.883	0.889	0.952	0.935	0.933	0.931	0.944	0.974	0.946	0.922	0.89	0.861	0.938	0.913	0.912	0.915	0.924	0.92	0.935	0.95	0.956	0.942	0.959
Master Protein	P10636-6	Isoform Tau-D of Microtubule-associated protein tau OS=Homo sapiens GN=MAPT	MAPT			High	FALSE	35	1959	16	0	353.103	7137.53	78.329	5924.53						0.51	0.515	0.53	0.526	0.461	0.489	0.413	0.426	0.531	0.518	0.527	0.535	0.968	0.979	1.32	1.346	0.932	0.925	1.339	1.366	1.767	1.856	1.367	1.449	0.465	0.464	0.486	0.487	0.456
Master Protein	B9EKR1	Receptor-type tyrosine-protein phosphatase zeta OS=Mus musculus GN=Ptprz1 PE=1 SV=1	Ptprz1	19283	ENSMUSG00000068748	High	FALSE	42	1793	42	0	353.018	6693.56	21.1073	5.225	6	cell differentiation;cell organization and biogenesis;metabolic process;regulation of biological process;response to stimulus	cytoplasm;extracellular;membrane	catalytic activity;protein binding	Pf00041, Pf00102, Pf00194, Pf13350, Pf14566	0.992	0.998	0.941	0.912	0.983	0.98	0.91	0.889	1.012	1.006	0.951	0.951	0.992	1.006	1.003	1.018	0.921	0.896	1.024	1.025	0.933	0.931	0.929	0.919	0.954	0.972	1.038	1.036	0.98
Master Protein	O08529	Calpain-2 catalytic subunit OS=Mus musculus GN=Capn2 PE=2 SV=4	Capn2	12334	ENSMUSG00000026509	High	FALSE	38	539	38	0	352.837	2218.4	67.8571	73.989	1	metabolic process;regulation of biological process;response to stimulus	chromosome;cytoplasm;cytosol;endoplasmic reticulum;Golgi;membrane;nucleus;vacuole	catalytic activity;metal ion binding;protein binding	Pf00648, Pf01067, Pf13833	0.873	0.859	0.879	0.853	0.857	0.869	0.954	0.957	0.933	0.918	0.982	0.949	0.889	0.895	0.887	0.862	0.859	0.857	0.927	0.909	0.982	0.971	0.986	0.951	0.904	0.956	0.94	0.923	0.911
Master Protein	P43006	Excitatory amino acid transporter 2 OS=Mus musculus GN=Slc1a2 PE=1 SV=1	Slc1a2	20511	ENSMUSG00000005089	High	FALSE	29	3285	3	0	352.786	10973.9	47.028	700.704	2	cell communication;regulation of biological process;response to stimulus;transport	cell surface;membrane	transporter activity	Pf00375	0.863	0.863	1.004	0.98	0.911	0.902	0.945	0.929	0.887	0.886	1.031	1.005	0.85	0.847	0.851	0.854	0.976	0.957	0.94	0.939	1.044	1.03	1.021	1	0.877	0.879	0.952	0.954	1.02
Master Protein	Q3TCS0	Putative uncharacterized protein OS=Mus musculus GN=Prep PE=2 SV=1	Prep	19072		High	FALSE	44	661	44	0	352.632	2436.74	76.4789	51.894	10	metabolic process	cytoplasm;cytosol;membrane;nucleus	catalytic activity	Pf00326, Pf02897	0.943	0.962	0.941	0.934	0.947	0.974	0.964	0.973	1.005	1.005	0.97	0.965	0.925	0.959	0.965	0.974	0.928	0.916	1.037	1.031	0.968	0.956	0.995	0.982	0.94	0.978	1.006	1.001	0.958
Master Protein	P47708	Rabphilin-3A OS=Mus musculus GN=Rph3a PE=1 SV=2	Rph3a	19894	ENSMUSG00000029608	High	FALSE	43	765	41	0	350.885	3112.42	60.793	117.85	5	cell organization and biogenesis;regulation of biological process;response to stimulus;transport	cytosol;Golgi;membrane	metal ion binding;protein binding	Pf00130, Pf00168, Pf02318, Pf05715	1.016	1.022	0.993	0.988	1.011	1.037	0.993	1.03	1.023	1.023	0.973	0.999	1	1.004	1.058	1.046	0.986	1.005	1.003	1.004	0.969	1.003	0.964	0.994	0.99	1.009	1.032	1.024	1.031
Master Protein	Q8C338	Isocitrate dehydrogenase [NADP] OS=Mus musculus GN=Idh1 PE=2 SV=1	Idh1	15926		High	FALSE	37	987	4	0	350.756	3462.38	73.6967	326.455	1	metabolic process;regulation of biological process;response to stimulus	cytoplasm;cytosol;mitochondrion	catalytic activity;metal ion binding;nucleotide binding;protein binding	Pf00180, Pf01960	0.887	0.906	0.892	0.881	0.89	0.888	1.019	1.031	1.021	1.034	1.018	1.048	0.847	0.876	0.884	0.901	0.84	0.811	1.002	1.004	1.063	1.045	0.993	1.022	0.93	0.931	0.958	0.966	0.946
Master Protein	Q3TKG4	Putative uncharacterized protein (Fragment) OS=Mus musculus GN=Psmc3 PE=2 SV=1	Psmc3	19182		High	FALSE	36	662	35	0	350.671	2567.21	70.5179	511.481	2	metabolic process;regulation of biological process;response to stimulus	cytoplasm;membrane;nucleus;proteasome	catalytic activity;nucleotide binding;protein binding	Pf00004, Pf01078, Pf05496, Pf07724, Pf07728, Pf13191	1.008	0.999	0.939	0.935	1.005	0.964	0.926	0.945	1.049	1.037	0.981	0.969	1.012	0.988	1.01	1.016	0.9	0.894	1.056	1.032	0.97	0.963	0.955	0.961	1.017	0.984	1.053	1.033	1.035
Master Protein	E9Q2X2	Neurexin-3 OS=Mus musculus GN=Nrxn3 PE=4 SV=1	Nrxn3		ENSMUSG00000066392	High	FALSE	43	666	1	0	350.215	2437.68	40.1869	14.431	12	cell communication;cell organization and biogenesis;regulation of biological process;transport		protein binding	Pf00008, Pf00054, Pf02210, Pf13385
Master Protein	C9K0Y3	AMPA-selective glutamate receptor 1 flip type OS=Mus musculus GN=Gria1 PE=2 SV=1	Gria1	14799		High	FALSE	40	1196	1	0	350.104	4305.33	43.6604	33.438	11	cell communication;metabolic process;regulation of biological process;response to stimulus;transport	cell surface;cytosol;endoplasmic reticulum;endosome;membrane	protein binding;receptor activity;signal transducer activity;transporter activity	Pf00060, Pf00497, Pf01094, Pf10613	1.048	1.03	1.056		1.07	1.132	0.883	0.771	1.037	1	1.005		1.056	0.986	1.175	1.096	1.101	1.013	1.01	0.992	0.937		0.889		0.894	0.956	1.047	1.024	1.011
Master Protein	Q8BIJ6	Isoleucine--tRNA ligase, mitochondrial OS=Mus musculus GN=Iars2 PE=1 SV=1	Iars2	381314	ENSMUSG00000026618	High	FALSE	39	572	39	0	350.022	2274.95	50.8893	32.055	1	metabolic process;regulation of biological process	cytoplasm;cytosol;mitochondrion;organelle lumen	catalytic activity;nucleotide binding	Pf00133, Pf01921, Pf06827, Pf08264, Pf09334, Pf13603	1.017	1.004	0.958	0.949	1.004	0.987	0.958	0.986	1.016	0.999	0.987	0.991	1.059	1.005	1.01	0.977	0.958	0.955	0.983	0.98	0.978	0.982	0.963	0.964	1.018	1.014	1.007	0.99	1.015
Master Protein	Q8BHN3	Neutral alpha-glucosidase AB OS=Mus musculus GN=Ganab PE=1 SV=1	Ganab	14376		High	FALSE	42	749	42	0	348.602	3158.11	50.3178	21.758	19	metabolic process	endoplasmic reticulum;Golgi;membrane	catalytic activity;protein binding;RNA binding	Pf01055, Pf13802	0.988	0.981	0.911	0.912	0.97	0.943	0.927	0.941	1.021	1.026	0.962	0.986	0.992	0.988	0.99	0.987	0.901	0.888	0.993	1	0.943	0.968	0.951	0.966	0.962	0.943	1.002	1.016	0.971
Master Protein	E9Q2W9	Alpha-actinin-4 (Fragment) OS=Mus musculus GN=Actn4 PE=4 SV=1	Actn4		ENSMUSG00000054808	High	FALSE	36	1075	1	0	348.16	4296.44	70.0772	157.489	7	cell organization and biogenesis		protein binding	Pf00307, Pf00435, Pf11971	0.975	0.979	0.977	0.965	1.04	1.069	0.903	0.917	1.056	1.063	0.977	1.022	1.017	1.001	1.003	1.005	0.869	0.93	1.033	1.081	1.031	1.003	0.963	1.033	1.041	1.098	1.037	1.071	1.071
Master Protein	P05201	Aspartate aminotransferase, cytoplasmic OS=Mus musculus GN=Got1 PE=1 SV=3	Got1	14718	ENSMUSG00000025190	High	FALSE	36	1739	36	0	347.77	6602.87	84.0194	516.947	19	metabolic process;regulation of biological process;response to stimulus	cytoplasm;cytosol;mitochondrion;nucleus;vacuole	catalytic activity;protein binding	Pf00155	0.984	0.973	0.953	0.939	0.976	0.947	1.032	1.012	1.015	0.987	0.995	0.992	0.954	0.938	0.988	0.973	0.967	0.941	1.011	1.003	0.986	0.984	0.971	0.971	0.963	0.939	1.007	0.997	1.029
Master Protein	P05063	Fructose-bisphosphate aldolase C OS=Mus musculus GN=Aldoc PE=1 SV=4	Aldoc	11676	ENSMUSG00000017390	High	FALSE	35	4365	30	0	347.745	17088.4	80.7163	1220.68	11	cell death;cell differentiation;cell organization and biogenesis;metabolic process	cytoplasm;mitochondrion	catalytic activity;protein binding	Pf00274	0.934	0.951	0.853	0.837	0.936	0.935	0.913	0.936	0.998	0.997	0.962	0.959	0.914	0.944	0.95	0.954	0.816	0.826	0.986	0.987	0.908	0.907	0.939	0.936	0.964	0.973	0.996	1.001	0.963
Master Protein	Q8QZT1	Acetyl-CoA acetyltransferase, mitochondrial OS=Mus musculus GN=Acat1 PE=1 SV=1	Acat1	110446	ENSMUSG00000032047	High	FALSE	31	1723	31	0	347.578	6540.83	69.3396	1736.8	9	cell organization and biogenesis;metabolic process;response to stimulus	membrane;mitochondrion;organelle lumen	catalytic activity;metal ion binding;protein binding	Pf00108, Pf00109, Pf02803	1.025	1.039	0.962	0.95	0.998	1	0.924	0.936	1.047	1.039	0.991	0.973	0.995	1.013	1.009	1.017	0.937	0.941	1.011	1.006	0.942	0.928	0.927	0.913	0.995	1.005	1.031	1.02	1.028
Master Protein	Q68FL0	Slc8a1 protein OS=Mus musculus GN=Slc8a1 PE=2 SV=1	Slc8a1	20541	ENSMUSG00000054640	High	FALSE	35	1044	1	0	347.4	3974.11	38.8309	127.265	17	cell communication;cellular homeostasis;regulation of biological process;response to stimulus;transport	cytosol;membrane;mitochondrion	metal ion binding;protein binding;transporter activity	Pf01699, Pf03160	1.032	1.035	1.005	0.998	0.99	0.995	0.904	0.901	1.027	1.014	0.95	0.955	1.044	1.052	1.043	1.044	0.922	0.913	0.937	0.932	0.956	0.957	0.933	0.928	0.979	0.985	1.011	1.017	0.977
Master Protein	Q922F4	Tubulin beta-6 chain OS=Mus musculus GN=Tubb6 PE=1 SV=1	Tubb6	67951	ENSMUSG00000001473	High	FALSE	27	9006	8	0	347.234	31391.4	62.4161	2153.43	18	metabolic process	cytoplasm;cytoskeleton;nucleus	catalytic activity;nucleotide binding;structural molecule activity	Pf00091, Pf03953, Pf10644	0.899	0.906	1.048	1.062	1.2	1.112	0.91	0.904	0.741	0.772	0.835	0.873	1.094	1.119	0.925	0.927	1.062	0.993	0.805	0.811	0.954	0.974	0.925	0.924	1.098	0.946	0.808	0.831	1.022
Master Protein	Q3TSQ1	Putative uncharacterized protein OS=Mus musculus GN=Atp1b1 PE=2 SV=1	Atp1b1	11931		High	FALSE	33	3039	33	0	347.221	10921.9	64.4737	50801.2	1	cell organization and biogenesis;cellular homeostasis;metabolic process;regulation of biological process;response to stimulus;transport	membrane	catalytic activity;enzyme regulator activity;metal ion binding;nucleotide binding;protein binding;transporter activity	Pf00287	0.889	0.915	1.023	1.014	0.885	0.835	1.028	1.038	0.914	0.944	1.043	1.041	0.816	0.839	0.887	0.907	1.005	1.012	0.898	0.922	0.999	1.003	1.018	1.023	0.931	0.886	0.928	0.949	0.997
Master Protein	O08749	Dihydrolipoyl dehydrogenase, mitochondrial OS=Mus musculus GN=Dld PE=1 SV=2	Dld	13382	ENSMUSG00000020664	High	FALSE	30	2191	30	0	347.092	9512.33	70.9234	238.503	12	cellular homeostasis;metabolic process;regulation of biological process	mitochondrion;organelle lumen	catalytic activity;nucleotide binding	Pf00070, Pf00890, Pf01134, Pf01946, Pf02852, Pf03486, Pf07992, Pf12831, Pf13450	1.005	1.01	0.982	0.971	1.012	1.003	0.921	0.905	1.008	1.021	0.971	0.972	1.019	1.03	0.992	0.996	0.929	0.913	0.988	0.986	0.952	0.958	0.934	0.937	1.05	1.044	1.02	1.032	1.045
Master Protein	Q9Z140	Copine-6 OS=Mus musculus GN=Cpne6 PE=2 SV=1	Cpne6	12891	ENSMUSG00000022212	High	FALSE	42	1699	4	0	346.18	6374.18	77.1993	246.708	14	cell differentiation;response to stimulus	cytoplasm;endosome;membrane	protein binding	Pf00092, Pf00168, Pf07002, Pf10138	0.99	0.948	1.014	1.007	1.012	1.024	0.898	0.884	0.939	0.897	0.946	0.952	1.006	0.965	1.016	0.969	1.018	1	0.926	0.883	0.948	0.947	0.966	0.966	0.864	0.885	0.97	0.913	0.939
Master Protein	Q3UF49	Putative uncharacterized protein (Fragment) OS=Mus musculus GN=Atp1a1 PE=2 SV=1	Atp1a1	11928		High	FALSE	25	5274	1	0	345.508	24677.4	56.8966	3161.28	3	cellular homeostasis;metabolic process;regulation of biological process;response to stimulus;transport	endoplasmic reticulum;endosome;Golgi;membrane	catalytic activity;metal ion binding;nucleotide binding;protein binding;transporter activity	Pf00689, Pf08282
Master Protein	Q923T9	Calcium/calmodulin-dependent protein kinase type II subunit gamma OS=Mus musculus GN=Camk2g PE=1 SV=1	Camk2g	12325	ENSMUSG00000021820	High	FALSE	32	2421	16	0	345.451	9760.48	71.6446	500.187	14	cell differentiation;cell organization and biogenesis;development;metabolic process;regulation of biological process;response to stimulus;transport	endoplasmic reticulum;membrane	catalytic activity;nucleotide binding;protein binding	Pf00069, Pf07714, Pf08332, Pf12680, Pf13474, Pf14534	0.897	0.929	1.01	0.981	0.941	0.946	0.976	0.998	0.925	0.961	1.076	1.044	0.862	0.913	0.872	0.9	1.005	0.999	1.031	1.059	1.063	1.048	1.066	1.045	0.949	0.977	0.966	0.991	1
Master Protein	E9QKC6	Tripartite motif-containing protein 2 OS=Mus musculus GN=Trim2 PE=4 SV=1	Trim2	80890	ENSMUSG00000027993	High	FALSE	37	610	35	0	344.663	2511.93	56.8831	83.495	3	regulation of biological process	cytoplasm	catalytic activity;metal ion binding;protein binding	Pf00097, Pf00630, Pf00643, Pf01436, Pf08450, Pf10174, Pf13445, Pf13639, Pf13920, Pf13923, Pf14634, Pf15227	0.936	0.97	0.927	0.894	1.021	0.989	0.934	0.928	1.008	0.998	0.991	0.941	0.94	0.967	0.925	0.956	0.895	0.873	0.992	1.007	0.955	0.92	0.981	0.931	0.998	0.991	1.039	1.043	1.056
Master Protein	Q99NE5-7	Isoform 7 of Regulating synaptic membrane exocytosis protein 1 OS=Mus musculus GN=Rims1	Rims1			High	FALSE	60	530	9	0	344.58	2097.51	61.8243	14.155				protein binding	Pf00168, Pf00595, Pf01485, Pf02318	1.1	1.032	0.985	0.946	0.973	1.061	0.906	0.921	1.055	1.028	0.937	0.889	1.004	0.952	1.082	1.04	0.945	0.952	1.039	1.039	0.96	0.897	0.926	0.872	0.898	0.939	1.091	0.985	1.003
Master Protein	E9PUJ6	E3 ubiquitin-protein ligase MYCBP2 OS=Mus musculus GN=Mycbp2 PE=1 SV=1	Mycbp2	105689	ENSMUSG00000033004	High	FALSE	74	315	74	0	344.214	1102.53	17.8887	1.096	14	cell organization and biogenesis;cellular component movement;metabolic process;regulation of biological process	cytoskeleton;membrane;nucleus	catalytic activity;metal ion binding;protein binding	Pf00415, Pf00630, Pf06136, Pf08005, Pf08239, Pf13540, Pf13639, Pf13923	0.995	0.999	0.922	0.911	1.009	0.968	0.902	0.951	1.008	1.003	0.909	0.899	0.958	0.978	1	0.995	0.936	0.971	1.019	0.996	0.92	0.914	0.882	0.883	1.006	0.963	1.014	1.013	1.019
Master Protein	Q922D8	C-1-tetrahydrofolate synthase, cytoplasmic OS=Mus musculus GN=Mthfd1 PE=1 SV=4	Mthfd1	108156	ENSMUSG00000021048	High	FALSE	47	693	46	0	344.175	2505.42	57.0053	22.018	12	metabolic process	cytoplasm;cytosol;membrane;mitochondrion	catalytic activity;nucleotide binding	Pf00763, Pf01268, Pf02882	0.99	0.989	0.895	0.887	0.974	0.956	0.911	0.923	1.008	1.004	0.948	0.961	0.954	0.941	0.964	0.964	0.885	0.871	1.002	0.985	0.909	0.933	0.93	0.944	0.977	0.971	0.987	0.972	0.99
Master Protein	P09405	Nucleolin OS=Mus musculus GN=Ncl PE=1 SV=2	Ncl	17975	ENSMUSG00000026234	High	FALSE	57	1250	4	0	344.019	4329.83	53.1825	71.903	1	regulation of biological process;response to stimulus;transport	cell surface;cytoplasm;membrane;nucleus	DNA binding;metal ion binding;nucleotide binding;protein binding;RNA binding	Pf00076, Pf13893, Pf14259	0.971	0.988	0.904	0.898	0.938	0.94	0.954	0.935	1.042	1.047	0.981	0.986	0.96	0.976	0.981	0.98	0.933	0.908	1.068	1.078	0.956	0.968	0.958	0.967	0.972	0.973	1.024	1.04	0.989
Master Protein	Q3UHL1	CaM kinase-like vesicle-associated protein OS=Mus musculus GN=Camkv PE=1 SV=2	Camkv	235604	ENSMUSG00000032936	High	FALSE	35	1465	35	0	343.835	5883.01	65.8203	504.48	9	metabolic process	membrane	catalytic activity;nucleotide binding;protein binding	Pf00069, Pf07714	0.985	0.954	1.02	1.017	0.991	1.001	0.885	0.885	0.953	0.949	0.942	0.937	0.981	0.98	1.02	1.013	0.996	0.982	1.004	1.001	0.945	0.947	0.943	0.945	0.94	0.953	0.996	0.979	0.986
Master Protein	Q3UM45	Protein phosphatase 1 regulatory subunit 7 OS=Mus musculus GN=Ppp1r7 PE=1 SV=2	Ppp1r7	66385	ENSMUSG00000026275	High	FALSE	31	749	31	0	343.664	3235.47	81.7175	1929.7	1	regulation of biological process	chromosome;nucleus	protein binding	Pf12799, Pf13855, Pf14580	0.976	0.933	0.949	0.941	0.966	0.994	0.955	0.942	1.054	1.033	1.012	1.007	0.981	0.937	1.005	0.957	0.918	0.915	1.046	1.015	0.955	0.967	0.969	0.973	0.992	1.025	1.068	1.036	1.014
Master Protein	Q9D051	Pyruvate dehydrogenase E1 component subunit beta, mitochondrial OS=Mus musculus GN=Pdhb PE=1 SV=1	Pdhb	68263	ENSMUSG00000021748	High	FALSE	19	2569	19	0	343.615	10483.6	65.7382	5274	14	metabolic process	mitochondrion;nucleus;organelle lumen	catalytic activity	Pf02779, Pf02780	1.007	1.008	0.983	0.971	1.014	1.008	0.872	0.879	0.984	0.976	0.956	0.943	1.046	1.045	0.97	0.96	0.884	0.885	0.969	0.968	0.95	0.946	0.914	0.909	1.025	1.023	1.005	0.999	1.015
Master Protein	P68510	14-3-3 protein eta OS=Mus musculus GN=Ywhah PE=1 SV=2	Ywhah	22629	ENSMUSG00000018965	High	FALSE	32	3326	24	0	342.742	11537.2	88.6179	21543.3	5	cell organization and biogenesis;metabolic process;regulation of biological process;response to stimulus;transport	cytoplasm;cytosol;membrane	protein binding	Pf00244	0.908	0.96	1.036	1.028	0.969	0.934	1.041	1.049	0.913	0.96	1.041	1.059	0.88	0.938	0.89	0.945	0.973	0.977	0.976	1.015	1.037	1.049	1.054	1.067	0.936	0.925	0.975	0.995	1.05
Master Protein	Q9ERK4	Exportin-2 OS=Mus musculus GN=Cse1l PE=2 SV=1	Cse1l	110750	ENSMUSG00000002718	High	FALSE	47	446	47	0	342.489	1861.09	56.9516	22.018	2	transport	cytoplasm;cytosol;membrane;nucleus	protein binding;transporter activity	Pf03378, Pf03810, Pf08506	0.97	0.982	0.963	0.924	0.951	0.95	0.974	0.945	0.999	0.995	1.005	0.975	0.98	0.964	0.957	0.977	0.961	0.923	0.994	0.986	0.997	0.968	1.015	0.983	0.976	0.984	0.99	0.985	1.002
Master Protein	F8VPM7	ELKS/Rab6-interacting/CAST family member 1 OS=Mus musculus GN=Erc1 PE=1 SV=1	Erc1	111173	ENSMUSG00000030172	High	FALSE	56	650	2	0	342.437	2285.49	43.9286	13.607	6	metabolic process;regulation of biological process;transport	cytoplasm;endoplasmic reticulum;Golgi;membrane	protein binding	Pf04156, Pf05529, Pf05557, Pf05622, Pf09457, Pf09726, Pf10174, Pf12128, Pf13166	1.007	1.026	0.912	0.913	0.958	0.968	0.929	0.938	1.03	1.03	0.964	0.996	0.993	0.992	1.031	1.054	0.951	0.948	1.059	1.035	0.975	0.973	0.907	0.908	0.96	0.987	1.089	1.09	1.001
Master Protein	Q99MI1-2	Isoform 2 of ELKS/Rab6-interacting/CAST family member 1 OS=Mus musculus GN=Erc1	Erc1	111173	ENSMUSG00000030172	High	FALSE	55	647	1	0	341.726	2282.17	50.6148	18.953	6	metabolic process;regulation of biological process;transport	cytoplasm;endoplasmic reticulum;Golgi;membrane	protein binding	Pf04156, Pf05529, Pf05557, Pf05622, Pf09726, Pf10174, Pf12128, Pf13166				0.895								0.861										0.948		0.901
Master Protein	F8VQJ3	Laminin subunit gamma-1 OS=Mus musculus GN=Lamc1 PE=4 SV=1	Lamc1	226519	ENSMUSG00000026478	High	FALSE	48	498	48	0	341.49	1886.53	29.9938	6.902	1	cell organization and biogenesis;cellular component movement;regulation of biological process	cytoskeleton;extracellular	catalytic activity;motor activity;protein binding;structural molecule activity	Pf00052, Pf00053, Pf00055, Pf00261, Pf01576, Pf04012, Pf05262, Pf05483, Pf05557, Pf05701, Pf06008, Pf06160, Pf08317, Pf10174, Pf12795, Pf13514, Pf13868, Pf13949	0.931	0.939	0.895	0.843	0.877	0.833	0.911	0.905	1.019	1.055	0.883	0.84	0.934	0.939	0.922	0.916	0.928	0.914	0.939	0.965	0.935	0.929	0.823	0.823	0.979	0.946	1.089	1.12	0.954
Master Protein	Q9Z2Q6	Septin-5 OS=Mus musculus GN=Sept5 PE=1 SV=2	Sept5	18951	ENSMUSG00000072214	High	FALSE	32	1921	25	0	341.004	7645.31	72.6287	2370.37	16	cell division;regulation of biological process	cytoplasm;cytoskeleton;membrane	catalytic activity;nucleotide binding;protein binding	Pf00735, Pf03193	0.947	0.973	0.971	0.958	0.941	0.94	0.99	0.999	1.019	1.037	1.025	1.011	0.947	0.964	0.937	0.956	0.962	0.953	1.06	1.074	1.007	0.997	0.987	0.971	1.018	1.017	1.065	1.077	1.06
Master Protein	P06801	NADP-dependent malic enzyme OS=Mus musculus GN=Me1 PE=1 SV=2	Me1	17436	ENSMUSG00000032418	High	FALSE	33	704	1	0	340.247	2968.43	70.1049	199.923	9	cell organization and biogenesis;metabolic process;regulation of biological process;response to stimulus	cytoplasm;cytosol;mitochondrion	catalytic activity;metal ion binding;nucleotide binding;protein binding	Pf00390, Pf03949	1.005	0.999	0.852	0.874	0.98	0.995	0.931	0.913	0.98	0.984	0.905	0.943	1.005	1.013	1.013	1.015	0.843	0.838	0.976	0.993	0.947	0.975	0.872	0.908	0.932	0.977	1.008	1.016	0.948
Master Protein	Q921S3	Malic enzyme OS=Mus musculus GN=Me1 PE=2 SV=1	Me1	17436		High	FALSE	33	704	1	0	340.064	2969.49	70.1049	199.923	9	cell organization and biogenesis;metabolic process;regulation of biological process;response to stimulus	cytoplasm;cytosol;mitochondrion	catalytic activity;metal ion binding;nucleotide binding;protein binding	Pf00390, Pf03949			0.805	0.891			0.934	0.826			1.011	1.091					0.901	0.792			1.057	1.168	0.782	0.861
Master Protein	Q6ZQ61	MCG121979, isoform CRA_c (Fragment) OS=Mus musculus GN=Matr3 PE=2 SV=1	Matr3	17184		High	FALSE	45	968	45	0	339.636	3496.52	50	50.795	18	regulation of biological process	cytoplasm;membrane;nucleus	metal ion binding;nucleotide binding;RNA binding	Pf00076, Pf13893, Pf14259	0.977	0.989	0.948	0.935	0.983	0.968	0.909	0.926	1.014	1.007	0.978	0.975	0.941	0.951	0.975	0.989	0.944	0.945	1.031	1.026	0.957	0.947	0.959	0.945	0.974	0.963	1.013	1	1.028
Master Protein	Q5SUC3	Calnexin, isoform CRA_a OS=Mus musculus GN=Canx PE=2 SV=1	Canx	12330	ENSMUSG00000020368	High	FALSE	45	1311	45	0	339.581	4889.36	56.3452	583.341	11	metabolic process;transport	cytoplasm;cytosol;endoplasmic reticulum;membrane;ribosome	metal ion binding;protein binding;RNA binding	Pf00262	0.955	0.945	0.933	0.902	0.922	0.938	0.896	0.948	1.016	0.996	1.016	0.99	0.934	0.935	0.961	0.963	0.87	0.892	1.003	0.984	0.969	0.957	0.959	0.937	0.961	0.982	0.989	0.975	0.979
Master Protein	Q02248	Catenin beta-1 OS=Mus musculus GN=Ctnnb1 PE=1 SV=1	Ctnnb1	12387	ENSMUSG00000006932	High	FALSE	40	745	35	0	338.514	2751.24	66.8374	62.096	9	cell communication;cell differentiation;cell organization and biogenesis;cell proliferation;cellular component movement;metabolic process;regulation of biological process;response to stimulus;transport	cytoplasm;cytoskeleton;cytosol;membrane;nucleus	DNA binding;protein binding;signal transducer activity	Pf00514	1.017	1.005	0.97	0.942	0.955	0.98	0.941	0.964	1.03	1.009	0.987	0.968	0.966	0.969	1.006	0.993	0.959	0.958	1.021	1.012	0.979	0.97	0.933	0.921	0.947	0.951	1.053	1.025	1.018
Master Protein	Q8BMG7	Rab3 GTPase-activating protein non-catalytic subunit OS=Mus musculus GN=Rab3gap2 PE=1 SV=2	Rab3gap2	98732		High	FALSE	52	531	1	0	338.414	1925.65	41.4348	12.594	1	regulation of biological process	cytoplasm;membrane	enzyme regulator activity;protein binding	Pf14655, Pf14656								1.143										0.842
Master Protein	P35486	Pyruvate dehydrogenase E1 component subunit alpha, somatic form, mitochondrial OS=Mus musculus GN=Pdha1 PE=1 SV=1	Pdha1	18597	ENSMUSG00000031299	High	FALSE	32	1908	31	0	336.622	6288.53	74.8718	1088.02	X	metabolic process	mitochondrion;nucleus;organelle lumen	catalytic activity	Pf00676	0.998	0.977	0.959	0.968	0.984	0.98	0.91	0.904	0.978	0.953	0.951	0.959	0.975	0.949	0.976	0.944	0.931	0.919	0.968	0.945	0.927	0.943	0.888	0.898	0.99	0.989	0.991	0.966	1.003
Master Protein	Q80SW1	Putative adenosylhomocysteinase 2 OS=Mus musculus GN=Ahcyl1 PE=1 SV=1	Ahcyl1	229709	ENSMUSG00000027893	High	FALSE	35	1444	19	0	335.933	5392.08	60.3774	192.07	3	metabolic process;regulation of biological process;response to stimulus;transport	cytoplasm;cytosol;endoplasmic reticulum;membrane	catalytic activity;nucleotide binding;protein binding;RNA binding	Pf00670, Pf01262, Pf01488, Pf02254, Pf02826, Pf05221	0.929	0.96	0.993	0.975	0.901	0.88	1.038	1.037	0.945	0.981	1.083	1.091	0.879	0.9	0.918	0.93	0.988	0.976	0.945	0.975	1.029	1.04	1.032	1.028	0.908	0.914	0.96	0.99	0.936
Master Protein	O88569	Heterogeneous nuclear ribonucleoproteins A2/B1 OS=Mus musculus GN=Hnrnpa2b1 PE=1 SV=2	Hnrnpa2b1	53379	ENSMUSG00000004980	High	FALSE	32	2581	2	0	335.752	10142.6	67.9887	7846.6	6	metabolic process;regulation of biological process;transport	chromosome;cytoplasm;extracellular;membrane;nucleus;spliceosomal complex	DNA binding;nucleotide binding;RNA binding	Pf00076, Pf13893, Pf14259	0.994	0.991	0.955	0.942	0.994	1.012	0.874	0.88	1.002	1.001	0.989	0.987	1.01	1.014	0.983	0.99	0.905	0.903	1.033	1.023	0.959	0.962	0.977	0.973	0.972	0.994	1.021	1.012	1.005
Master Protein	Q8BMF3	NADP-dependent malic enzyme, mitochondrial OS=Mus musculus GN=Me3 PE=1 SV=2	Me3	109264	ENSMUSG00000030621	High	FALSE	38	761	37	0	334.575	3088.24	66.8874	134.388	7	metabolic process	mitochondrion;organelle lumen	catalytic activity;metal ion binding;nucleotide binding	Pf00390, Pf03949	0.954	0.963	0.97	0.973	0.92	0.961	0.853	0.88	0.69	0.7	1.097	1.1	1.159	1.191	0.719	0.733	1.169	1.174	1.062	1.064	1.122	1.129	0.667	0.694	0.898	0.924	1.132	1.152	0.948
Master Protein	Q8CC88	von Willebrand factor A domain-containing protein 8 OS=Mus musculus GN=Vwa8 PE=2 SV=2	Vwa8	219189	ENSMUSG00000058997	High	FALSE	67	349	67	0	333.462	1268.85	41.5748	4.002	14	metabolic process	extracellular;mitochondrion	catalytic activity;nucleotide binding	Pf00092, Pf07728, Pf13191, Pf13519, Pf13521	1.002	0.959	0.902	0.887	0.965	0.925	0.905	0.919	1.029	0.99	0.929	0.922	0.972	0.934	0.985	0.926	0.877	0.888	1.004	0.931	0.898	0.883	0.89	0.881	1.017	0.987	1.022	0.969	1.008
Master Protein	Q60902	Epidermal growth factor receptor substrate 15-like 1 OS=Mus musculus GN=Eps15l1 PE=1 SV=3	Eps15l1	13859	ENSMUSG00000006276	High	FALSE	46	575	46	0	333.383	2171.3	59.2062	28.628	8	cell differentiation;cell organization and biogenesis;cellular component movement;metabolic process;regulation of biological process;transport	cytoplasm;cytoskeleton;Golgi;membrane;nucleus	catalytic activity;metal ion binding;motor activity;nucleotide binding;protein binding;structural molecule activity;transporter activity	Pf00038, Pf00261, Pf00529, Pf00769, Pf01496, Pf01576, Pf02321, Pf02463, Pf02841, Pf02994, Pf03148, Pf03938, Pf03962, Pf03999, Pf04012, Pf04111, Pf04156, Pf04778, Pf04912, Pf05103, Pf05149, Pf05478, Pf05483, Pf05557, Pf05622, Pf05667, Pf05701, Pf06008, Pf06160, Pf06818, Pf07111, Pf07798, Pf07888, Pf07926, Pf08317, Pf08614, Pf09311, Pf09726, Pf09730, Pf09731, Pf09755, Pf10146, Pf10168, Pf10174, Pf1…	1.023	1.052	0.937	0.95	1.053	1.053	0.882	0.904	1.02	1.03	0.925	0.966	1.018	1.052	1.025	1.047	0.908	0.924	1.047	1.042	0.934	0.963	0.895	0.92	1.043	1.035	1.057	1.076	1.062
Master Protein	D3Z6I8	Tropomyosin alpha-3 chain OS=Mus musculus GN=Tpm3 PE=3 SV=1	Tpm3	59069	ENSMUSG00000027940	High	FALSE	43	1455	11	0	333.236	5587.66	81.3765	7304.27	3		cytoplasm;cytoskeleton	protein binding	Pf00261, Pf12718	1.02	1.02	0.919	0.911	1.019	1.027	0.92	0.942	0.997	1.006	0.904	0.897	0.968	0.964	1.033	1.014	0.944	0.96	1.055	1.073	0.938	0.938	0.886	0.882	0.992	1.004	1.055	1.08	1.084
Master Protein	Q6ZPJ3	E2/E3 hybrid ubiquitin-protein ligase UBE2O OS=Mus musculus GN=Ube2o PE=1 SV=3	Ube2o	217342	ENSMUSG00000020802	High	FALSE	46	602	46	0	332.977	2343.6	41.5373	12.06	11	metabolic process;regulation of biological process;transport	cytoplasm;cytosol;nucleus	catalytic activity;nucleotide binding;protein binding;RNA binding	Pf00179	1.004	0.973	0.935	0.947	0.982	0.994	0.944	0.967	1.032	0.992	0.965	0.977	0.981	0.954	1.007	0.992	0.92	0.927	1.067	1.029	0.973	0.977	0.982	0.986	1.002	1.015	1.059	1.015	1.014
Master Protein	E9PXY8	Ubiquitin carboxyl-terminal hydrolase OS=Mus musculus GN=Usp7 PE=3 SV=1	Usp7	252870	ENSMUSG00000022710	High	FALSE	43	389	43	0	332.132	1521.45	41.3823	12.445	16	development;metabolic process;regulation of biological process;response to stimulus	cytoplasm;cytosol;nucleus	catalytic activity;protein binding	Pf00443, Pf00917, Pf12436, Pf13423, Pf14533	0.985	1.018	0.987	0.973	0.987	1.02	0.991	0.947	1.002	1.025	0.988	0.977	0.987	1.031	1.01	1.012	0.98	0.951	1.019	1.024	0.992	0.99	0.991	0.976	0.964	0.993	1.031	1.035	1.015
Master Protein	Q9CVB6	Actin-related protein 2/3 complex subunit 2 OS=Mus musculus GN=Arpc2 PE=1 SV=3	Arpc2	76709	ENSMUSG00000006304	High	FALSE	30	2077	30	0	331.773	8181.79	84.6667	2461.09	1	cell organization and biogenesis;regulation of biological process	cytoplasm;cytoskeleton;endosome;Golgi;membrane	protein binding;structural molecule activity	Pf04045	1.053	1.062	0.974	0.982	1.069	1.055	0.883	0.91	0.989	0.983	0.921	0.937	1.049	1.045	1.053	1.053	0.968	0.975	0.984	0.986	0.919	0.938	0.921	0.942	0.972	0.973	1.01	1.016	1.027
Master Protein	Q6GQT9	Nodal modulator 1 OS=Mus musculus GN=Nomo1 PE=1 SV=1	Nomo1	211548	ENSMUSG00000030835	High	FALSE	43	422	43	0	331.101	1609.02	50.2471	8.397	7		membrane		Pf05738, Pf13620, Pf13715, Pf14686	0.979	0.987	0.919	0.91	0.973	0.982	0.891	0.92	1.015	1.026	0.966	0.955	0.968	0.944	0.969	0.972	0.867	0.885	1.021	1.035	0.961	0.964	0.935	0.934	0.948	0.968	0.972	0.987	0.988
Master Protein	Q7TNL5	Protein phosphatase 2, regulatory subunit B (B56), delta isoform, isoform CRA_a OS=Mus musculus GN=Ppp2r5d PE=2 SV=1	Ppp2r5d	21770		High	FALSE	34	534	27	0	330.832	2136.89	72.437	170.907	17	regulation of biological process;response to stimulus		enzyme regulator activity;protein binding	Pf01603	0.997	0.994	0.99	0.992	1.006	0.991	1.019	1.019	1.042	1.039	1.048	1.058	0.987	0.996	0.984	0.98	0.921	0.94	1.031	1.018	0.794	0.814	1.05	1.056	1.02	1.02	1.017	1.011	1.034
Master Protein	B7ZP22	Heterogeneous nuclear ribonucleoprotein A2/B1 OS=Mus musculus GN=Hnrnpa2b1 PE=2 SV=1	Hnrnpa2b1	53379		High	FALSE	32	2560	2	0	330.809	10051.5	69.2082	12914.5	6	metabolic process;regulation of biological process;transport	chromosome;cytoplasm;extracellular;membrane;nucleus;spliceosomal complex	DNA binding;nucleotide binding;RNA binding	Pf00076, Pf13893, Pf14259			0.785				0.88				0.828						0.849				0.822		0.768
Master Protein	Q6A065	Centrosomal protein of 170 kDa OS=Mus musculus GN=Cep170 PE=1 SV=2	Cep170	545389	ENSMUSG00000057335	High	FALSE	63	491	61	0	330.326	1639.24	45.7809	6.313	1		cytoplasm;cytoskeleton;membrane	protein binding	Pf00498, Pf15308	1.029	1.05	0.911	0.915	0.978	0.989	0.955	0.949	1.059	1.086	0.953	0.959	0.956	0.975	0.975	1.008	0.865	0.846	1.103	1.116	0.977	0.979	0.965	1	1.003	1.035	1.078	1.094	1.031
Master Protein	H3BIV5	A-kinase anchor protein 5 OS=Mus musculus GN=Akap5 PE=4 SV=1	Akap5	238276	ENSMUSG00000021057	High	FALSE	37	522	37	0	330.184	2376.96	67.8191	67.84	12	cell organization and biogenesis;regulation of biological process;response to stimulus;transport	cytoplasm;cytoskeleton;membrane	protein binding	Pf03832	1.021	1.031	0.988	0.964	0.992	1.008	0.915	0.918	1.03	1.032	1.058	1.041	0.962	0.969	0.98	0.988	0.92	0.906	1.155	1.155	1.06	1.037	0.955	0.945	1.015	1.038	1.178	1.175	1.144
Master Protein	P14211	Calreticulin OS=Mus musculus GN=Calr PE=1 SV=1	Calr	12317	ENSMUSG00000003814	High	FALSE	33	1313	33	0	330.088	4890.89	78.6058	609.54	8	cell differentiation;cell organization and biogenesis;metabolic process;regulation of biological process;response to stimulus;transport	cell surface;cytoplasm;cytosol;endoplasmic reticulum;extracellular;Golgi;membrane;nucleus;organelle lumen	metal ion binding;protein binding;RNA binding	Pf00262	0.993	0.995	0.911	0.921	0.957	0.962	1.002	1.014	1.036	1.038	1.033	1.055	0.92	0.942	0.971	0.974	0.926	0.938	1.046	1.046	1.012	1.045	0.959	0.976	0.976	0.994	1.036	1.037	1.049
Master Protein	P16054	Protein kinase C epsilon type OS=Mus musculus GN=Prkce PE=1 SV=1	Prkce	18754	ENSMUSG00000045038	High	FALSE	46	863	44	0	329.805	3218.16	53.1886	62.731	17	cell division;cell organization and biogenesis;cellular homeostasis;metabolic process;regulation of biological process;response to stimulus;transport	cytoplasm;cytoskeleton;cytosol;endoplasmic reticulum;Golgi;membrane;mitochondrion;nucleus	catalytic activity;enzyme regulator activity;metal ion binding;nucleotide binding;protein binding	Pf00069, Pf00130, Pf00168, Pf00433, Pf07714	1.019	1.005	1.018	1.006	0.987	0.998	0.955	0.952	0.986	0.976	1.002	1.02	1.008	0.994	1.012	0.991	1.019	1.022	0.974	0.958	0.959	0.972	0.986	0.989	0.92	0.964	1.022	1.024	1.009
Master Protein	A2APL5	Excitatory amino acid transporter 2 OS=Mus musculus GN=Slc1a2 PE=1 SV=1	Slc1a2	20511	ENSMUSG00000005089	High	FALSE	27	3152	1	0	329.455	10398.8	47.4153	629.957	2	cell communication;regulation of biological process;response to stimulus;transport	cell surface;membrane	transporter activity	Pf00375			1.131	0.988	0.618		1.1	1.151			1.114	1.002					1.53	1.651			1.435	1.226	1.187	1	0.695				0.747
Master Protein	Q8BYR5-2	Isoform 2 of Calcium-dependent secretion activator 2 OS=Mus musculus GN=Cadps2	Cadps2	320405	ENSMUSG00000017978	High	FALSE	48	715	36	0	329.409	2886.64	43.4816	7.66	6	cell communication;cell organization and biogenesis;regulation of biological process;response to stimulus;transport	membrane	metal ion binding;protein binding	Pf00169, Pf06292	1.01	1.036	1.042	0.957	0.878	0.939	0.906	0.924	1.017	1.018	0.98	0.945	0.992	0.977	1.019	1.019	0.924	0.969	1.044	1.059	0.994	0.926	1.005	0.958	0.864	0.925	1.008	1.04	0.879
Master Protein	Q8CI71	Coiled-coil domain-containing protein 132 OS=Mus musculus GN=Ccdc132 PE=2 SV=2	Ccdc132; Vps50	73288	ENSMUSG00000001376	High	FALSE	45	396	45	0	329.167	1685.51	57.3651	17.874	6	transport	endosome;membrane	protein binding	Pf10474, Pf10475	0.989	0.978	0.949	0.938	1.019	0.995	0.917	0.912	0.996	0.967	0.981	0.965	1.012	0.961	0.993	0.988	0.936	0.916	1.005	0.983	0.981	0.965	0.995	0.981	1.005	1.003	1.033	1.01	1.017
Master Protein	Q91VR5	ATP-dependent RNA helicase DDX1 OS=Mus musculus GN=Ddx1 PE=1 SV=1	Ddx1	104721	ENSMUSG00000037149	High	FALSE	46	594	46	0	328.997	2473.22	63.9189	42.481	12	development;metabolic process;regulation of biological process;response to stimulus	cytoplasm;membrane;nucleus	catalytic activity;DNA binding;nucleotide binding;protein binding;RNA binding	Pf00270, Pf00271, Pf00622	1.018	0.998	0.963	0.937	0.959	0.987	0.938	0.923	1.053	1.047	1.016	0.99	1.058	1.031	0.986	0.969	0.937	0.93	1.019	1.012	1.003	0.991	1.006	0.981	0.955	0.983	1.072	1.053	0.997
Master Protein	O08917	Flotillin-1 OS=Mus musculus GN=Flot1 PE=1 SV=1	Flot1	14251	ENSMUSG00000059714	High	FALSE	32	829	31	0	328.393	3399.75	75.7009	261.636	17	cell organization and biogenesis;cellular component movement;regulation of biological process;response to stimulus;transport	cytoskeleton;endosome;membrane	protein binding	Pf01145	0.989	0.987	0.948	0.955	0.989	0.978	0.849	0.869	1.031	1.041	0.955	0.959	0.977	0.992	1.015	1.007	0.907	0.911	1.018	1.02	0.901	0.9	0.904	0.899	0.974	0.991	1.002	1.013	0.931
Master Protein	Q6ZPT2	MKIAA1352 protein (Fragment) OS=Mus musculus GN=Lars PE=2 SV=1	Lars	107045		High	FALSE	48	449	32	0	328.319	1725.05	46.3636	12.689	18	metabolic process;regulation of biological process	cytoplasm;nucleus	catalytic activity;nucleotide binding	Pf00133, Pf01406, Pf08264, Pf09334	0.992	0.982	0.914	0.929	1.005	0.993	0.93	0.893	1.011	1	0.908	0.907	0.978	0.971	1.007	0.986	0.936	0.909	1.018	1.009	0.922	0.928	0.938	0.953	0.979	0.975	1.014	0.994	1.01
Master Protein	Q8CD76	Kinesin light chain 1 OS=Mus musculus GN=Klc1 PE=1 SV=1	Klc1	16593	ENSMUSG00000021288	High	FALSE	42	570	30	0	328.256	2217.18	62.3377	126.427	12	cell organization and biogenesis;cellular component movement;metabolic process;transport	cytoplasm;cytoskeleton;cytosol;membrane	catalytic activity;motor activity;protein binding	Pf08317, Pf09311, Pf13374, Pf13414, Pf13424, Pf14559	0.905	0.91	0.958	0.925	0.925	0.867	1.015	1.021	0.98	0.978	1.074	1.045	0.873	0.881	0.92	0.921	0.905	0.894	0.979	0.969	1.075	1.042	1.082	1.065	0.973	0.942	0.966	0.963	0.985
Master Protein	Q8BH66	Atlastin-1 OS=Mus musculus GN=Atl1 PE=1 SV=1	Atl1	73991	ENSMUSG00000021066	High	FALSE	35	889	33	0	327.905	3703.92	63.7993	180.161	12	cell organization and biogenesis;metabolic process	cytoplasm;endoplasmic reticulum;Golgi;membrane	catalytic activity;nucleotide binding;protein binding	Pf02263	0.985	0.97	0.986	0.971	1.001	0.988	0.935	0.954	1.011	1.005	0.977	0.989	0.992	0.991	0.994	0.985	0.94	0.952	1.05	1.048	0.944	0.951	0.955	0.961	1.008	1.008	1.034	1.031	1.034
Master Protein	Q9JKK7	Tropomodulin-2 OS=Mus musculus GN=Tmod2 PE=1 SV=2	Tmod2	50876	ENSMUSG00000032186	High	FALSE	33	1093	32	0	327.817	4310.68	84.0456	2014.34	9	cell communication;cell organization and biogenesis;regulation of biological process;response to stimulus	cytoplasm;cytoskeleton	protein binding	Pf03250	1.034	1.058	1.006	1.038	1.064	1.093	0.911	0.9	1.013	0.995	0.951	0.948	1.054	1.067	1.045	1.08	0.96	1.022	1.021	1.021	0.944	0.949	0.934	0.947	0.977	1.001	1.045	1.04	1.017
Master Protein	Q66JR7	Pgm2 protein (Fragment) OS=Mus musculus GN=Pgm2 PE=2 SV=1	Pgm2	72157		High	FALSE	36	939	35	0	327.555	3618.18	63.3898	78.433	4	metabolic process	cytoplasm;cytoskeleton	catalytic activity;metal ion binding	Pf00408, Pf02878, Pf02879, Pf02880	0.985	0.961	0.902	0.895	0.956	0.96	0.964	0.985	1.036	1.01	1.009	1.001	0.948	0.929	0.979	0.959	0.89	0.895	1.013	0.995	0.946	0.933	0.942	0.934	1.005	1.027	1.068	1.049	1.015
Master Protein	Q8CAA7	Glucose 1,6-bisphosphate synthase OS=Mus musculus GN=Pgm2l1 PE=1 SV=1	Pgm2l1	70974	ENSMUSG00000030729	High	FALSE	38	748	37	0	326.608	2877.76	57.3269	88.125	7	metabolic process	cytosol	catalytic activity;metal ion binding	Pf00408, Pf02878, Pf02879, Pf02880	1.007	1.011	1.022	0.988	0.935	0.923	0.942	0.988	1.007	1.001	0.999	0.987	0.904	0.913	1.012	1.012	0.951	0.98	0.95	0.94	0.986	0.979	0.979	0.979	0.971	0.977	1.062	1.053	1.063
Master Protein	Q9CZ13	Cytochrome b-c1 complex subunit 1, mitochondrial OS=Mus musculus GN=Uqcrc1 PE=1 SV=2	Uqcrc1	22273	ENSMUSG00000025651; ENSMUSG00000107235	High	FALSE	32	2356	31	0	326.564	10309.7	63.125	617.966	9; CHR_MG117_PATCH	metabolic process;response to stimulus;transport	membrane;mitochondrion	catalytic activity;metal ion binding;protein binding	Pf00675, Pf05193, Pf08367	0.966	0.949	0.974	0.97	0.986	0.984	0.933	0.925	0.965	0.958	0.98	0.991	0.977	0.952	0.943	0.934	0.926	0.912	0.926	0.923	0.963	0.981	0.963	0.973	0.994	0.988	0.965	0.953	1.007
Master Protein	Q7TMF4	Propionyl Coenzyme A carboxylase, beta polypeptide OS=Mus musculus GN=Pccb PE=2 SV=1	Pccb	66904		High	FALSE	31	713	1	0	326.397	2846.57	69.5009	92.804	9	metabolic process	mitochondrion	catalytic activity;nucleotide binding	Pf01039	0.987	0.985	0.92	0.923	0.974	0.999	0.938	0.924	0.993	0.985	0.952	0.955	1.017	0.997	0.956	0.955	0.921	0.904	0.932	0.938	0.95	0.949	0.919	0.926	0.956	0.995	0.981	0.98	0.951
Master Protein	Q3UPL0	Protein transport protein Sec31A OS=Mus musculus GN=Sec31a PE=1 SV=2	Sec31a	69162	ENSMUSG00000035325	High	FALSE	46	538	46	0	326.378	2213.86	36.9919	25.827	5	response to stimulus;transport	cytoplasm;endoplasmic reticulum;endosome;membrane	protein binding	Pf03154, Pf12931	0.986	0.984	0.917	0.916	0.979	0.976	0.924	0.948	1.009	1.008	0.953	0.963	0.962	0.944	0.97	0.979	0.911	0.918	1.046	1.036	0.961	0.962	0.956	0.938	0.972	0.992	1.041	1.034	1.003
Master Protein	Q9D0E1	Heterogeneous nuclear ribonucleoprotein M OS=Mus musculus GN=Hnrnpm PE=1 SV=3	Hnrnpm	76936	ENSMUSG00000059208	High	FALSE	49	684	48	0	325.899	2323.64	67.3525	37.178	17	metabolic process;regulation of biological process;response to stimulus	cell surface;membrane;nucleus;spliceosomal complex	nucleotide binding;protein binding;RNA binding	Pf00076, Pf11532, Pf11608, Pf13893, Pf14259	1.004	0.991	0.933	0.946	0.985	0.963	0.957	0.942	1.022	1.029	0.979	1.01	0.974	0.979	1.011	1.007	0.981	0.965	1.035	1.021	0.939	0.956	0.915	0.941	0.947	0.941	1.021	1.007	0.99
Master Protein	P21619	Lamin-B2 OS=Mus musculus GN=Lmnb2 PE=1 SV=2	Lmnb2	16907	ENSMUSG00000062075	High	FALSE	45	935	40	0	325.701	3468.05	67.953	63.495	10		membrane;nucleus	structural molecule activity	Pf00038, Pf00932, Pf04156	0.949	0.96	0.885	0.879	0.929	0.955	0.868	0.855	0.968	0.96	0.942	0.922	0.929	0.94	0.957	0.958	0.933	0.907	0.979	0.963	0.895	0.884	0.884	0.868	0.937	0.955	0.996	0.999	0.959
Master Protein	Q8BMF4	Dihydrolipoyllysine-residue acetyltransferase component of pyruvate dehydrogenase complex, mitochondrial OS=Mus musculus GN=Dlat PE=1 SV=2	Dlat	235339	ENSMUSG00000000168	High	FALSE	30	2069	30	0	325.542	7781.57	54.2056	161.975	9	metabolic process	mitochondrion;organelle lumen	catalytic activity	Pf00198, Pf00364, Pf02817	0.957	0.954	0.997	0.993	0.956	0.943	0.861	0.889	0.954	0.936	0.95	0.962	0.96	0.96	0.914	0.9	0.892	0.898	0.923	0.899	0.961	0.969	0.893	0.897	0.978	0.982	0.973	0.957	1.006
Master Protein	O35551-6	Isoform 6 of Rab GTPase-binding effector protein 1 OS=Mus musculus GN=Rabep1	Rabep1	54189	ENSMUSG00000020817	High	FALSE	56	438	56	0	325.32	1508.69	55.3241	21.638	11	cell death;metabolic process;transport	cytoplasm;endosome	enzyme regulator activity;protein binding;transporter activity	Pf01496, Pf03528, Pf04111, Pf09311, Pf09726, Pf12128	1.001	1.002	0.914	0.912	0.99	0.972	0.921	0.96	1.027	1.029	0.938	0.957	0.948	0.968	1.003	1.002	0.867	0.89	1.043	1.022	0.957	0.971	0.906	0.909	0.981	0.972	1.049	1.04	1.063
Master Protein	Q6PB44	Tyrosine-protein phosphatase non-receptor type 23 OS=Mus musculus GN=Ptpn23 PE=1 SV=2	Ptpn23	104831	ENSMUSG00000036057	High	FALSE	53	409	53	0	324.965	1678.67	35.6383	7.938	9	cell organization and biogenesis;metabolic process;regulation of biological process;transport	cytoplasm;cytoskeleton;endosome;nucleus	catalytic activity;protein binding	Pf00102, Pf03097, Pf13949	0.995	0.997	0.897	0.877	0.97	0.954	0.93	0.92	1.022	1.023	0.956	0.935	0.982	1.01	0.993	0.985	0.892	0.883	1.022	1.028	0.938	0.927	0.914	0.907	0.967	0.961	1.039	1.031	0.999
Master Protein	O70589	Peripheral plasma membrane protein CASK OS=Mus musculus GN=Cask PE=1 SV=2	Cask	12361		High	FALSE	45	431	4	0	324.931	1667.92	58.7473	18.638	X	metabolic process;regulation of biological process;transport	cytoplasm;cytosol;membrane;nucleus	catalytic activity;nucleotide binding;protein binding	Pf00018, Pf00069, Pf00595, Pf00625, Pf02828, Pf07653, Pf07714, Pf13180, Pf14604	1.021	0.987	0.972	0.933	0.894	0.939	0.972	0.968	1.069	1.049	1.03	1	0.999	0.966	1.03	0.998	0.951	0.935	1.084	1.037	0.987	0.972	0.96	0.95	0.89	0.939	1.039	1.034	0.948
Master Protein	X2D841	Glutamate transporter 1c OS=Mus musculus PE=2 SV=1	Slc1a2	20511		High	FALSE	27	3145	1	0	324.762	10379	47.5763	574.44	2	cell communication;regulation of biological process;response to stimulus;transport	cell surface;membrane	transporter activity	Pf00375						1.004	0.873										0.805									0.886
Master Protein	Q3UJP4	T-complex protein 1 subunit gamma OS=Mus musculus GN=Cct3 PE=2 SV=1	Cct3	12462		High	FALSE	39	1194	1	0	324.116	4127.89	69.1743	99	3	cell organization and biogenesis;metabolic process;regulation of biological process;transport	cytoplasm;membrane	nucleotide binding;protein binding;RNA binding	Pf00118								0.973										1.016
Master Protein	Q8CE30	Putative uncharacterized protein OS=Mus musculus GN=Ncl PE=2 SV=1	Ncl	17975		High	FALSE	54	1158	1	0	323.822	3901.65	52.1924	57.171	1	regulation of biological process;response to stimulus;transport	cell surface;cytoplasm;membrane;nucleus	DNA binding;metal ion binding;nucleotide binding;protein binding;RNA binding	Pf00076, Pf13893, Pf14259			0.771								0.857										0.844		0.785
Master Protein	Q3UNN1	Putative uncharacterized protein OS=Mus musculus GN=Sept7 PE=2 SV=1	Sept7	235072		High	FALSE	37	1564	1	0	323.595	6007.11	76.555	1583.89	9	cell division;cell growth;cell organization and biogenesis;metabolic process	chromosome;cytoplasm;cytoskeleton;membrane;nucleus	nucleotide binding;protein binding	Pf00735, Pf01926, Pf04111						0.926																				1.03
Master Protein	Q7TMU5	Iqgap2 protein (Fragment) OS=Mus musculus GN=Iqgap2 PE=2 SV=1	Iqgap2	544963		High	FALSE	46	442	6	0	323.474	1776.05	63.7749	19.117	13	cell organization and biogenesis;regulation of biological process;response to stimulus	cell surface;cytoplasm	enzyme regulator activity;protein binding	Pf00307	1.111		0.641	0.631	1.082	1.174	0.902	0.94	0.963		0.634	0.659	0.895		1.056		1	0.859	0.938		1.016	0.902	0.617	0.623	1.043	0.858	1.052		0.997
Master Protein	Q80UJ7	Rab3 GTPase-activating protein catalytic subunit OS=Mus musculus GN=Rab3gap1 PE=2 SV=4	Rab3gap1	226407	ENSMUSG00000036104	High	FALSE	44	362	44	0	323.32	1441.14	50.3568	18.085	1	cell organization and biogenesis;regulation of biological process;response to stimulus;transport	cytoplasm;cytosol;Golgi	enzyme regulator activity;protein binding	Pf13890	0.894	0.893	1.065	1.027	0.93	0.921	0.978	0.995	0.897	0.893	1.073	1.059	0.87	0.845	0.881	0.871	0.946	0.955	0.879	0.866	1.049	1.037	1.067	1.053	0.947	0.927	0.924	0.92	0.989
Master Protein	E9QL53	Citron Rho-interacting kinase OS=Mus musculus GN=Cit PE=1 SV=1	Cit	12704	ENSMUSG00000029516	High	FALSE	75	326	75	0	322.428	1101.1	34.0146	3.225	5	cell differentiation;cell division;cell organization and biogenesis;development;metabolic process;regulation of biological process;response to stimulus	cytoplasm;cytoskeleton;membrane;vacuole	catalytic activity;metal ion binding;motor activity;nucleotide binding;protein binding	Pf00069, Pf00130, Pf00169, Pf00261, Pf00433, Pf00780, Pf01576, Pf02463, Pf03962, Pf04156, Pf05557, Pf05622, Pf07714, Pf07888, Pf09728, Pf09731, Pf10174, Pf12128, Pf13166, Pf13514, Pf14531	0.958	0.956	0.861	0.848	0.939	0.959	1.062	1.093	1.146	1.154	0.956	0.969	0.883	0.899	0.969	0.959	0.855	0.921	1.118	1.127	0.901	0.924	0.877	0.888	1.141	1.168	1.095	1.09	1.06
Master Protein	F8WHW6	Phosphatidylinositol 4-phosphate 5-kinase type-1 gamma OS=Mus musculus GN=Pip5k1c PE=1 SV=1	Pip5k1c	18717	ENSMUSG00000034902	High	FALSE	33	721	30	0	321.457	2735.35	54.0029	161.975	10	cell organization and biogenesis;metabolic process;response to stimulus;transport	cytoplasm;cytosol;membrane	catalytic activity;nucleotide binding;protein binding	Pf01504	1.015	0.97	0.976	0.98	0.959	0.965	1.001	0.976	1.004	0.977	0.965	0.968	0.952	0.917	0.981	0.941	0.984	0.95	1.034	1.006	0.98	0.986	0.976	0.985	0.969	0.976	1.046	1.031	1.053
Master Protein	Q6ZQ74	MKIAA0666 protein (Fragment) OS=Mus musculus GN=Daam1 PE=2 SV=1	Daam1	208846		High	FALSE	58	418	51	0	321.409	1452.86	51.5179	13.148	12	cell organization and biogenesis	cytoplasm;membrane	protein binding	Pf02181, Pf06367, Pf06371	1.02	0.998	0.917	0.901	0.97	1.022	0.896	0.915	0.998	0.99	0.936	0.934	1.034	1.001	1.016	0.998	0.881	0.887	0.987	0.974	0.917	0.92	0.913	0.92	0.95	1.033	1.044	1.005	0.954
Master Protein	B2RQ80	Tnik protein OS=Mus musculus GN=Tnik PE=2 SV=1	Tnik	665113	ENSMUSG00000027692	High	FALSE	50	604	35	0	321.266	2266.46	43.2353	9.939	3	cell organization and biogenesis;metabolic process;regulation of biological process;response to stimulus	cytoplasm;cytoskeleton;endosome;membrane;nucleus	catalytic activity;nucleotide binding;protein binding	Pf00069, Pf00780, Pf07714, Pf14531	1.047	0.98	0.928	0.97	1.016	1.042	0.962	0.939	1.045	0.957	0.936	0.963	0.987	0.904	1.009	0.93	0.974	0.926	1.136	1.054	0.941	0.994	0.945	0.98	0.998	1.016	1.067	0.976	1.062
Master Protein	Q91YT0	NADH dehydrogenase [ubiquinone] flavoprotein 1, mitochondrial OS=Mus musculus GN=Ndufv1 PE=1 SV=1	Ndufv1	17995	ENSMUSG00000037916	High	FALSE	28	1364	28	0	320.736	5039.72	74.569	246.091	19	metabolic process;transport	membrane;mitochondrion	catalytic activity;metal ion binding;nucleotide binding;protein binding	Pf01512, Pf10531, Pf10589	0.915	0.93	0.955	0.939	0.913	0.933	1	0.983	0.948	0.965	1.028	1.026	0.867	0.882	0.933	0.955	0.962	0.946	0.927	0.939	0.971	0.972	0.964	0.965	0.979	1.011	0.992	1.005	1
Master Protein	Q9Z268	RasGAP-activating-like protein 1 OS=Mus musculus GN=Rasal1 PE=2 SV=2	Rasal1	19415	ENSMUSG00000029602	High	FALSE	44	618	44	0	320.556	2229.08	67.7096	27.248	5	cell differentiation;regulation of biological process;response to stimulus	cytoplasm;cytosol;membrane	enzyme regulator activity;metal ion binding;protein binding	Pf00168, Pf00169, Pf00616, Pf00779	1.06	0.961	0.986	0.995	0.995	1.003	0.886	0.902	1.023	0.948	0.946	0.962	0.98	0.905	1.056	0.954	1.001	1.019	1.06	0.96	0.935	0.967	0.904	0.938	0.95	0.959	1.05	0.987	1.005
Master Protein	Q99MN9	Propionyl-CoA carboxylase beta chain, mitochondrial OS=Mus musculus GN=Pccb PE=1 SV=2	Pccb	66904	ENSMUSG00000032527	High	FALSE	31	709	1	0	320.357	2830.6	69.5009	86.992	9	metabolic process	mitochondrion;organelle lumen	catalytic activity;nucleotide binding	Pf01039	0.895	0.909	1.528	1.327	0.982		0.632	0.72	1.116	1.316	1.082	0.976	1.169	1.218	1.144	1.334	0.565	0.638	0.935	0.942	0.582	0.727	1.12	1.132	1.186		0.919	0.824	1.003
Master Protein	P10637-3	Isoform Tau-B of Microtubule-associated protein tau OS=Mus musculus GN=Mapt	Mapt	17762		High	FALSE	32	1941	2	0	320.262	7350.06	79.1209	5622.41	11	cell death;cell growth;cell organization and biogenesis;cellular component movement;regulation of biological process;response to stimulus;transport	cytoplasm;cytoskeleton;membrane;nucleus	protein binding	Pf00418	0.877	0.844	0.959	0.882	0.938	0.83	1.064	0.808	0.876	0.821	1.002	0.881	0.911	0.824	0.945	0.871	1.031	0.782	0.957	0.824	0.99	0.899	1.026	0.924	0.892	0.872	0.878	0.865	0.981
Master Protein	P48962	ADP/ATP translocase 1 OS=Mus musculus GN=Slc25a4 PE=1 SV=4	Slc25a4	11739	ENSMUSG00000031633	High	FALSE	34	5185	20	0	319.938	19575.7	89.9329	2564.02	8	cell organization and biogenesis;metabolic process;regulation of biological process;transport	membrane;mitochondrion;nucleus	protein binding;structural molecule activity;transporter activity	Pf00153	0.973	0.981	0.998	0.985	0.939	0.945	0.939	0.929	0.997	0.992	0.976	0.974	0.969	0.961	0.979	0.964	0.946	0.943	0.929	0.919	0.968	0.964	0.961	0.956	0.945	0.954	0.954	0.959	0.976
Master Protein	Q80T83	MKIAA1850 protein (Fragment) OS=Mus musculus GN=Vcpip1 PE=2 SV=1	Vcpip1	70675		High	FALSE	49	365	48	0	319.373	1377.33	49.9598	7.9	1	cell organization and biogenesis;metabolic process	cytoplasm;endoplasmic reticulum;Golgi	catalytic activity	Pf02338	1.01	0.986	0.921	0.903	0.978	1	0.941	0.977	1.024	1.008	0.968	0.955	0.99	0.977	1.019	1.003	0.948	0.975	1.046	1.034	0.948	0.953	0.938	0.917	0.984	0.97	1.043	1.032	1.02
Master Protein	E9Q8I9-2	Isoform 2 of Protein furry homolog OS=Mus musculus GN=Fry	Fry	320365		High	FALSE	58	296	57	0	318.576	1132.69	26.1142	1.845	5	cell organization and biogenesis	cytoplasm;cytoskeleton	enzyme regulator activity	Pf14222, Pf14225, Pf14228	1.042	0.995	0.953	0.965	1.04	1.019	0.953	0.976	0.995	0.978	0.94	0.971	1.057	1.023	1.049	1	0.956	0.964	0.996	0.98	0.936	0.968	0.961	0.968	0.978	0.975	1.01	0.994	1.02
Master Protein	Q9CWJ9	Bifunctional purine biosynthesis protein PURH OS=Mus musculus GN=Atic PE=1 SV=2	Atic	108147	ENSMUSG00000026192	High	FALSE	35	653	35	0	318.415	2690.83	74.8311	81.089	1	metabolic process;response to stimulus	membrane;mitochondrion	catalytic activity;protein binding	Pf01808, Pf02142	0.932	0.953	0.908	0.902	0.951	0.938	0.931	0.928	0.961	0.964	1.009	1.009	0.945	0.984	0.974	0.989	0.899	0.902	0.986	0.995	0.945	0.952	0.982	0.98	1.005	0.997	1.004	1.006	0.985
Master Protein	O54988-2	Isoform 2 of STE20-like serine/threonine-protein kinase OS=Mus musculus GN=Slk	Slk	20874	ENSMUSG00000025060	High	FALSE	48	487	45	0	317.65	1846.96	37.6872	11.217	19	cell death;metabolic process;regulation of biological process;response to stimulus	cytoplasm	catalytic activity;nucleotide binding;protein binding	Pf00069, Pf07714, Pf12474, Pf14531	0.97	0.995	0.924	0.934	1.02	1.027	0.949	0.952	0.975	1.001	0.964	0.969	0.921	0.957	0.983	1.006	0.943	0.943	0.993	1.004	0.953	0.954	0.939	0.939	0.99	0.984	0.992	1.024	1.027
Master Protein	Q6PHZ2	Calcium/calmodulin-dependent protein kinase type II subunit delta OS=Mus musculus GN=Camk2d PE=1 SV=1	Camk2d	108058	ENSMUSG00000053819	High	FALSE	32	2330	1	0	317.517	9418.34	74.3487	463.159	3	cell growth;cell organization and biogenesis;cellular component movement;cellular homeostasis;metabolic process;regulation of biological process;response to stimulus;transport	cytoplasm;cytosol;endoplasmic reticulum;membrane;nucleus	catalytic activity;nucleotide binding;protein binding	Pf00069, Pf07714, Pf08332, Pf12680, Pf13474, Pf14534	0.937	1.033		0.854	1.018	0.983	0.923		1.044	1.023		0.845	1.021	1.016	0.951	0.985	0.901		1.042	0.968		0.846		0.945	1.033	0.965	1.07	1.106	0.986
Master Protein	P17751	Triosephosphate isomerase OS=Mus musculus GN=Tpi1 PE=1 SV=4	Tpi1	21991	ENSMUSG00000023456	High	FALSE	31	2562	31	0	316.634	11233.3	80.602	4280.33	6	development;metabolic process	cytosol;nucleus	catalytic activity;protein binding	Pf00121	0.845	0.871	0.917	0.898	0.894	0.878	0.967	0.954	0.921	0.942	0.985	0.978	0.801	0.823	0.856	0.89	0.892	0.879	0.881	0.91	0.976	0.97	0.98	0.971	0.918	0.906	0.909	0.942	0.988
Master Protein	Q8BKX1-2	Isoform 2 of Brain-specific angiogenesis inhibitor 1-associated protein 2 OS=Mus musculus GN=Baiap2	Baiap2	108100	ENSMUSG00000025372	High	FALSE	40	1089	3	0	316.056	4069.11	83.5249	78.88	11	cell organization and biogenesis;regulation of biological process;response to stimulus	cytoplasm;cytoskeleton;cytosol;membrane	protein binding	Pf00018, Pf07653, Pf08397, Pf14604	1.016	1.036	0.984	0.96	1.045	1.045	0.931	0.941	0.996	1.013	0.987	0.974	0.975	1.024	1.01	1.026	0.982	0.98	1.072	1.082	0.978	0.967	0.941	0.931	0.991	0.999	1.078	1.097	1.101
Master Protein	B1ART2	Protein Vps13d OS=Mus musculus GN=Vps13d PE=1 SV=2	Vps13d	230895	ENSMUSG00000020220	High	FALSE	64	256	64	0	316.011	909.442	17.7677	0.967	4	transport		protein binding	Pf00627, Pf06650, Pf12624	0.996	1.046	0.905	0.887	1.066	1.022	0.874	0.88	1.014	1.023	0.927	0.926	1.031	1.073	1.006	1.047	0.889	0.887	0.999	0.984	0.908	0.901	0.916	0.91	1.016	0.982	0.987	0.988	1.043
Master Protein	P10630-2	Isoform 2 of Eukaryotic initiation factor 4A-II OS=Mus musculus GN=Eif4a2	Eif4a2	13682	ENSMUSG00000022884	High	FALSE	30	1342	13	0	315.586	5406.13	70.5882	907.518	16	metabolic process;regulation of biological process		catalytic activity;DNA binding;nucleotide binding;RNA binding	Pf00270, Pf00271, Pf04851	0.937	0.967	0.935	0.934	0.998	0.973	0.907	0.928	0.954	0.989	0.951	0.955	0.942	0.976	0.947	0.968	0.896	0.898	0.971	0.997	0.954	0.966	0.936	0.945	0.966	0.95	0.975	0.99	0.985
Master Protein	P09103	Protein disulfide-isomerase OS=Mus musculus GN=P4hb PE=1 SV=2	P4hb	18453	ENSMUSG00000025130	High	FALSE	36	889	36	0	315.331	3554.48	63.4578	69.795	11	cellular homeostasis;metabolic process;regulation of biological process;response to stimulus	endoplasmic reticulum;membrane;organelle lumen	catalytic activity;metal ion binding;protein binding;RNA binding	Pf00085, Pf01216, Pf13098, Pf13848, Pf13899, Pf13905	0.959	0.961	0.899	0.907	0.957	0.95	0.967	0.98	1.039	1.046	1.004	1.013	0.937	0.953	0.961	0.97	0.898	0.894	1.022	1.026	0.966	0.984	0.961	0.973	0.98	0.988	1	1.021	0.98
Master Protein	P18760	Cofilin-1 OS=Mus musculus GN=Cfl1 PE=1 SV=3	Cfl1	12631		High	FALSE	27	1809	23	0	315.06	7095.02	81.9277	261015	19	cell organization and biogenesis;cellular component movement;metabolic process;regulation of biological process;response to stimulus;transport	cytoplasm;cytoskeleton;cytosol;extracellular;membrane;nucleus	protein binding	Pf00241	0.897	0.919	0.984	0.956	0.883	0.895	1.009	1.018	0.931	0.94	1.04	1.005	0.815	0.832	0.901	0.918	0.982	0.995	0.971	0.984	0.996	0.98	1.009	0.983	0.915	0.939	0.98	0.992	0.984
Master Protein	B2RWT9	Plexin B1 OS=Mus musculus GN=Plxnb1 PE=2 SV=1	Plxnb1	235611		High	FALSE	43	386	41	0	314.46	1485.84	30.3445	3.942	9	cell growth;cell organization and biogenesis;regulation of biological process;response to stimulus	membrane	protein binding;receptor activity;signal transducer activity	Pf01403, Pf01437, Pf01833, Pf08337	0.958	0.958	0.909	0.895	0.954	0.953	0.888	0.94	1.014	1.004	0.965	0.965	0.953	0.956	0.977	0.982	0.87	0.901	1.001	0.997	0.955	0.939	0.936	0.919	0.947	0.949	0.992	0.999	0.968
Master Protein	B2RRH9	Guanine monphosphate synthetase OS=Mus musculus GN=Gmps PE=2 SV=1	Gmps	229363	ENSMUSG00000027823	High	FALSE	40	532	40	0	314.449	2108.8	69.697	37.986	3	metabolic process	cytoplasm;cytosol	catalytic activity;nucleotide binding	Pf00117, Pf00733, Pf00958, Pf01171, Pf02540, Pf03054, Pf06508, Pf07722	0.888	0.863	0.977	0.975	0.922	0.908	0.911	0.938	0.918	0.897	1.028	1.034	0.914	0.88	0.852	0.832	0.946	0.982	0.919	0.885	0.949	0.973	1.005	1.016	0.918	0.903	0.968	0.944	0.944
Master Protein	P06837	Neuromodulin OS=Mus musculus GN=Gap43 PE=1 SV=1	Gap43	14432	ENSMUSG00000047261	High	FALSE	32	1542	32	0	314.226	6414.44	86.3436	6659.85	16	cell differentiation;cell organization and biogenesis;cellular component movement;development;regulation of biological process;response to stimulus	cytoplasm;cytoskeleton;cytosol;membrane;nucleus	enzyme regulator activity;metal ion binding;protein binding	Pf00612, Pf10580	1.011	1.008	0.995	0.993	0.885	0.889	1.092	1.077	1.152	1.167	1.161	1.17	0.951	0.961	1.021	1.02	0.932	0.923	1.092	1.106	1.037	1.052	0.98	0.996	1.228	1.233	1.22	1.244	1.069
Master Protein	A2A7S7	Tyrosine--tRNA ligase, cytoplasmic OS=Mus musculus GN=Yars PE=4 SV=1	Yars	107271	ENSMUSG00000028811	High	FALSE	47	727	47	0	314.186	2652.95	76.5957	44.664	4	metabolic process	cytoplasm;nucleus	catalytic activity;nucleotide binding;RNA binding	Pf00579, Pf01588	0.922	0.946	0.902	0.885	0.903	0.905	0.952	0.97	0.958	0.985	0.997	0.979	0.845	0.87	0.99	0.999	0.951	0.964	0.927	0.945	0.922	0.913	1.047	1.028	1.028	1.04	0.941	0.956	0.98
Master Protein	Q6P1Y9	Exocyst complex component 1 OS=Mus musculus GN=Exoc1 PE=1 SV=1	Exoc1	69940	ENSMUSG00000036435	High	FALSE	35	469	35	0	314.175	1923.49	43.8402	24.809	5	regulation of biological process;response to stimulus;transport	cytoplasm;membrane	protein binding	Pf09763, Pf15277	0.959	0.939	0.99	0.959	1.018	1.023	0.952	0.952	0.979	0.964	1.026	0.994	0.992	0.95	0.976	0.958	0.98	0.972	1.004	0.975	0.998	0.982	1.012	0.976	1.017	1.017	1.021	0.986	1.045
Master Protein	P51830	Adenylate cyclase type 9 OS=Mus musculus GN=Adcy9 PE=1 SV=1	Adcy9	11515	ENSMUSG00000005580	High	FALSE	43	393	43	0	314.077	1556.49	39.6896	7.859	16	metabolic process;regulation of biological process;response to stimulus	membrane	catalytic activity;metal ion binding;nucleotide binding	Pf00211	1.008	1.015	0.962	0.93	0.992	1.033	0.95	0.953	0.998	0.989	0.912	0.901	1.051	1.051	1.011	1.028	0.959	0.979	0.989	0.974	0.925	0.917	0.932	0.935	0.973	0.993	1.045	1.021	1.02
Master Protein	Q9D8N0	Elongation factor 1-gamma OS=Mus musculus GN=Eef1g PE=1 SV=3	Eef1g	67160	ENSMUSG00000071644	High	FALSE	32	841	32	0	314.019	3262.34	75.5149	342.332	19	metabolic process;response to stimulus	cytoplasm;endoplasmic reticulum;membrane;nucleus	catalytic activity;protein binding;RNA binding	Pf00043, Pf00647, Pf02798, Pf13409, Pf13410, Pf13417, Pf14497	0.979	0.986	0.941	0.938	0.962	0.966	0.971	0.961	1.031	1.03	0.981	0.968	0.944	0.954	1	0.997	0.93	0.928	1.054	1.048	0.974	0.977	0.931	0.942	0.99	0.991	1.033	1.041	1.025
Master Protein	A2AB60	Formin-like 1, isoform CRA_c OS=Mus musculus GN=Fmnl1 PE=1 SV=1	Fmnl1	57778	ENSMUSG00000055805	High	FALSE	52	345	2	0	313.639	1292.6	48.0734	14.104	11	cell organization and biogenesis;cellular component movement;regulation of biological process	cytoplasm;cytosol;membrane	protein binding	Pf02181, Pf06367, Pf06371, Pf13851	0.956	1.081	0.76	0.888	1.098	1.102	0.93	0.913	0.945	1.049	0.771	0.859	1.031	1.208	0.902	1.039	0.9	0.849	0.89	1.006	0.795	0.874	0.767	0.92	1.178	1.142	0.97	1.062	1.191
Master Protein	Q8K010	5-oxoprolinase OS=Mus musculus GN=Oplah PE=2 SV=1	Oplah	75475	ENSMUSG00000022562	High	FALSE	43	361	43	0	313.131	1413.03	46.1957	9.701	15	metabolic process		catalytic activity;nucleotide binding	Pf01968, Pf02538, Pf05378	0.914	0.903	0.839	0.829	0.925	0.918	0.881	0.895	0.983	0.985	0.94	0.923	0.891	0.888	0.925	0.915	0.822	0.812	1.011	1.001	0.918	0.918	0.906	0.896	0.919	0.907	0.967	0.961	0.941
Master Protein	Q8C167	Prolyl endopeptidase-like OS=Mus musculus GN=Prepl PE=2 SV=1	Prepl	213760	ENSMUSG00000024127	High	FALSE	34	446	34	0	312.973	1921.01	60.4138	37.141	17	metabolic process	cytoplasm;cytoskeleton;cytosol;Golgi	catalytic activity	Pf00326, Pf02897	0.924	0.981	0.998	0.961	0.956	0.923	1.006	0.968	0.982	1.021	1.039	1.028	0.908	0.983	0.938	0.967	0.872	0.867	0.943	0.972	1.055	1.018	1.051	1.026	1.012	0.97	0.977	1.006	1.023
Master Protein	A1E2B8	Inducible heat shock protein 70 OS=Mus musculus PE=3 SV=1	Hspa1a	193740		High	FALSE	37	1518	1	0	312.933	6125.22	64.5866	92.966	17	cell organization and biogenesis;metabolic process;response to stimulus	cytoplasm;cytosol;membrane;mitochondrion;nucleus	catalytic activity;nucleotide binding;protein binding;RNA binding	Pf00012, Pf06723		0.853								0.978				1.125		1.024				0.919								1.033
Master Protein	Q80VP0	Tectonin beta-propeller repeat-containing protein 1 OS=Mus musculus GN=Tecpr1 PE=2 SV=1	Tecpr1	70381	ENSMUSG00000066621	High	FALSE	41	476	41	0	312.284	2003.18	43.2247	15.379	5	cell organization and biogenesis;metabolic process	membrane;vacuole		Pf00169, Pf06398, Pf06462	0.987	1.017	0.981	0.96	1.039	1.034	0.939	0.97	0.961	0.989	1.01	1.007	0.967	1.008	0.98	1.005	0.972	0.965	0.969	1.006	0.964	0.968	1	0.999	0.941	0.967	0.978	0.992	0.984
Master Protein	Q9WTS5	Teneurin-2 OS=Mus musculus GN=Tenm2 PE=2 SV=1	Tenm2	23964		High	FALSE	57	354	53	0	312.158	1255.63	25.2171	2.6	11	cellular component movement;metabolic process;regulation of biological process;response to stimulus	cell surface;endoplasmic reticulum;Golgi;membrane;nucleus	metal ion binding;protein binding	Pf01500, Pf02068, Pf05593, Pf06247, Pf06484, Pf07974, Pf15636	1.01	1.043	0.951	0.975	0.979	0.999	0.87	0.887	1.018	1.059	0.945	0.954	1.001	1.049	1.032	1.043	0.926	0.947	1.001	1.027	0.97	0.974	0.925	0.969	0.923	0.941	0.992	1.017	0.995
Master Protein	P08003	Protein disulfide-isomerase A4 OS=Mus musculus GN=Pdia4 PE=1 SV=3	Pdia4	12304		High	FALSE	41	671	41	0	311.537	2472.53	59.0909	64.156	6	cellular homeostasis;metabolic process;regulation of biological process;response to stimulus	cell surface;endoplasmic reticulum;organelle lumen	catalytic activity;metal ion binding;RNA binding	Pf00085, Pf01216, Pf13098, Pf13848, Pf13905	0.889	0.901	0.87	0.843	0.885	0.906	0.96	0.981	1.018	1.015	1.056	1.039	0.901	0.918	0.91	0.922	0.821	0.824	0.98	0.975	1.04	1.029	0.966	0.961	0.93	0.952	0.944	0.93	0.916
Master Protein	Q6GTX3	Apoe protein OS=Mus musculus GN=Apoe PE=2 SV=1	Apoe	11816		High	FALSE	29	1692	4	0	311.063	5964.29	70.0965	8911.51	7	cell organization and biogenesis;cellular homeostasis;metabolic process;regulation of biological process;response to stimulus;transport	cell surface;cytoplasm;endoplasmic reticulum;endosome;extracellular;Golgi;membrane;nucleus;vacuole	antioxidant activity;catalytic activity;enzyme regulator activity;metal ion binding;protein binding;transporter activity	Pf01442, Pf02720	0.65	0.635	0.525	0.515	0.683	0.65	0.726	0.729	0.776	0.762	0.729	0.732	0.63	0.618	0.65	0.642	0.547	0.56	0.79	0.776	0.788	0.776	0.714	0.712	0.671	0.646	0.642	0.639	0.692
Master Protein	Q9QZE5	Coatomer subunit gamma-1 OS=Mus musculus GN=Copg1 PE=2 SV=1	Copg; Copg1	54161	ENSMUSG00000030058	High	FALSE	36	305	33	0	310.337	1271.98	60.984	20.21	6	cellular component movement;transport	cytoplasm;cytosol;Golgi;membrane	structural molecule activity	Pf01602, Pf08752	0.934	0.945	0.971	0.982	0.929	0.947	1.043	0.998	0.973	0.996	1.024	1.054	0.928	0.96	0.922	0.935	0.964	0.934	0.979	1.005	1.015	1.045	1.002	1.036	0.942	0.934	0.977	1	0.973
Master Protein	Q00PI9	Heterogeneous nuclear ribonucleoprotein U-like protein 2 OS=Mus musculus GN=Hnrnpul2 PE=1 SV=2	Hnrnpul2	68693	ENSMUSG00000071659	High	FALSE	37	546	37	0	310.274	2058.13	45.2349	53.714	19		membrane;nucleus	protein binding;RNA binding	Pf00622, Pf02037, Pf13671	0.959	1.036	1.002	0.967	0.939	0.965	0.9	0.909	0.974	1.022	1.027	0.998	0.932	1.002	0.967	1.035	0.94	0.955	0.972	1.023	0.985	0.981	1.016	0.99	0.934	0.967	0.98	1.01	0.989
Master Protein	Q8R1B4	Eukaryotic translation initiation factor 3 subunit C OS=Mus musculus GN=Eif3c PE=1 SV=1	Eif3c	56347	ENSMUSG00000030738	High	FALSE	43	442	42	0	310.023	1656.79	43.9078	41.701	7	cell organization and biogenesis;metabolic process;regulation of biological process	cytoplasm	protein binding;RNA binding	Pf01399, Pf05470	0.968	0.951	0.924	0.948	0.959	0.966	0.966	0.997	1.009	0.981	0.983	1.009	0.953	0.944	0.994	0.98	0.991	0.97	1.006	0.977	0.932	0.979	0.937	0.967	0.953	0.976	1.027	0.99	0.977
Master Protein	B9EJ23	Cask protein OS=Mus musculus GN=Cask PE=2 SV=1	Cask	12361		High	FALSE	42	430	1	0	309.406	1660.33	54.7727	19.375	X	metabolic process;regulation of biological process;transport	cytoplasm;cytosol;membrane;nucleus	catalytic activity;nucleotide binding;protein binding	Pf00018, Pf00069, Pf00595, Pf00625, Pf02828, Pf07653, Pf07714, Pf13180, Pf14604	0.976	0.955	1.02	1.042	1.004	1.091	1.141	1.026	1.044	1.069	1.046	1.156	0.936	0.955	1.045	0.972	1.052	1.008	0.948	1.084	0.997	1.108	1.028	1.104	0.996	1.032	1.006	1.065	1.036
Master Protein	C9K0Y5	AMPA-selective glutamate receptor 3 flop type OS=Mus musculus GN=Gria3 PE=2 SV=1	Gria3	53623		High	FALSE	41	767	1	0	309.129	2747.31	45.7207	31.407	X	regulation of biological process;response to stimulus;transport	membrane	protein binding;receptor activity;signal transducer activity;transporter activity	Pf00060, Pf00497, Pf01094, Pf10613	1.145		0.951	0.979		1.104	0.816	0.882	1.053		0.785	0.826	1.105		1.032		0.919	0.881	1.09		0.888	0.821	0.915	0.822		1.016	1.029
Master Protein	Q9D6R2	Isocitrate dehydrogenase [NAD] subunit alpha, mitochondrial OS=Mus musculus GN=Idh3a PE=1 SV=1	Idh3a	67834	ENSMUSG00000032279	High	FALSE	28	2199	28	0	308.59	7376.41	57.6503	2992.58	9	metabolic process	mitochondrion;nucleus	catalytic activity;metal ion binding;nucleotide binding	Pf00180	0.965	0.934	1.031	1.03	0.934	0.958	0.938	0.944	0.935	0.909	1.005	1	0.884	0.87	0.92	0.895	0.99	0.99	0.913	0.886	1.003	1.002	0.982	0.981	0.899	0.919	0.901	0.881	0.982
Master Protein	Q9Z0X1	Apoptosis-inducing factor 1, mitochondrial OS=Mus musculus GN=Aifm1 PE=1 SV=1	Aifm1	26926	ENSMUSG00000036932	High	FALSE	31	627	31	0	308.522	2595.32	56.0458	99	X	cell death;cell differentiation;cell organization and biogenesis;cellular homeostasis;metabolic process;regulation of biological process;response to stimulus	cytoplasm;cytosol;membrane;mitochondrion;nucleus	catalytic activity;DNA binding;nucleotide binding;protein binding	Pf00070, Pf07992, Pf14721, Pf14962	0.961	0.979	0.893	0.911	0.966	0.986	0.959	0.95	1.042	1.025	0.935	0.947	0.96	0.98	0.951	0.958	0.947	0.952	0.966	0.972	0.941	0.952	0.904	0.904	0.957	0.978	1.008	1.008	0.995
Master Protein	F1DFN1	Na-coupled HCO3-cotransporter splice variant NBCn2 OS=Mus musculus GN=Slc4a10 PE=2 SV=1	Slc4a10	94229		High	FALSE	43	683	32	0	308.143	2644.82	39.7887	18.415	2	cellular homeostasis;metabolic process;response to stimulus;transport	membrane	transporter activity	Pf00955, Pf07565	0.979	0.994	0.895	0.873	0.92	0.907	0.95	0.946	1.048	1.063	0.974	0.963	0.909	0.95	0.97	0.966	0.895	0.896	1.065	1.075	1.001	1.003	0.954	0.938	0.987	0.975	1.002	1.014	1.021
Master Protein	Q03137	Ephrin type-A receptor 4 OS=Mus musculus GN=Epha4 PE=1 SV=2	Epha4	13838	ENSMUSG00000026235	High	FALSE	38	466	31	0	308.119	1853.7	49.8986	15.527	1	cell organization and biogenesis;cellular component movement;development;metabolic process;regulation of biological process;response to stimulus	cell surface;cytoplasm;endoplasmic reticulum;endosome;Golgi;membrane	catalytic activity;nucleotide binding;protein binding;receptor activity;signal transducer activity	Pf00041, Pf00069, Pf00536, Pf01404, Pf07647, Pf07699, Pf07714, Pf14575	0.974	0.896	1.053	1.047	0.999	1.004	0.971	0.993	0.94	0.852	0.996	0.984	0.992	0.909	0.989	0.911	1.014	1.023	0.928	0.857	1.004	0.997	1.017	1.006	0.924	0.937	0.947	0.881	0.997
Master Protein	Q9D1A2	Cytosolic non-specific dipeptidase OS=Mus musculus GN=Cndp2 PE=1 SV=1	Cndp2	66054	ENSMUSG00000024644	High	FALSE	26	598	26	0	308.073	2532.55	65.4737	302.027	18	metabolic process	cytoplasm;cytosol	catalytic activity;metal ion binding	Pf01546, Pf07687	0.94	0.936	0.909	0.904	0.953	0.974	0.967	1.005	1.001	0.994	0.977	0.982	0.964	0.941	0.958	0.948	0.867	0.87	1.006	1.005	0.957	0.953	0.958	0.95	0.977	0.987	0.996	0.999	0.967
Master Protein	Q3TVM2	Putative uncharacterized protein OS=Mus musculus GN=Aldh2 PE=2 SV=1	Aldh2	11669		High	FALSE	32	987	29	0	308.012	4123.44	56.0694	170.133	5	metabolic process;regulation of biological process	mitochondrion	catalytic activity;nucleotide binding;protein binding	Pf00171	0.925	0.921	0.918	0.907	0.908	0.887	0.951	0.939	1.014	0.995	0.986	0.973	0.902	0.898	0.95	0.952	0.912	0.894	0.992	0.972	0.974	0.97	0.934	0.929	0.999	0.977	0.943	0.928	0.91
Master Protein	P48036	Annexin A5 OS=Mus musculus GN=Anxa5 PE=1 SV=1	Anxa5	11747	ENSMUSG00000027712	High	FALSE	36	1020	35	0	307.901	3919.45	90.2821	574.44	3	cell organization and biogenesis;coagulation;regulation of biological process;response to stimulus;transport	cytoplasm;cytosol;endoplasmic reticulum;membrane;nucleus	catalytic activity;metal ion binding;protein binding;transporter activity	Pf00191	0.786	0.793	0.728	0.734	0.755	0.776	0.872	0.88	0.99	0.985	0.896	0.906	0.779	0.773	0.792	0.795	0.674	0.676	0.953	0.941	0.903	0.909	0.857	0.875	0.932	0.953	0.961	0.953	0.9
Master Protein	Q546G4	Albumin 1 OS=Mus musculus GN=Alb PE=2 SV=1	Alb	11657	ENSMUSG00000029368	High	FALSE	38	923	38	0	307.675	3529.06	66.1184	48.851	5	cell communication;regulation of biological process;response to stimulus;transport	cytoplasm;endoplasmic reticulum;extracellular;Golgi;nucleus	DNA binding;metal ion binding;protein binding	Pf00273	1.333	1.321	1.677	1.634	1.279	1.266	0.874	0.879	0.739	0.764	0.775	0.765	1.244	1.235	1.289	1.263	1.762	1.776	0.698	0.715	0.861	0.859	0.84	0.84	0.731	0.731	0.762	0.785	0.692
Master Protein	Q7TMK9	Heterogeneous nuclear ribonucleoprotein Q OS=Mus musculus GN=Syncrip PE=1 SV=2	Syncrip	56403	ENSMUSG00000032423	High	FALSE	36	618	2	0	307.652	2558.26	55.3772	49.119	9	cell differentiation;metabolic process;regulation of biological process;response to stimulus	cytoplasm;endoplasmic reticulum;membrane;nucleus;spliceosomal complex	nucleotide binding;RNA binding	Pf00076, Pf13893, Pf14259	0.995	1.008	0.929	0.949	1.018	0.997	0.938	0.93	1.004	1.019	0.969	0.998	0.987	1.003	0.992	0.999	0.933	0.912	1.02	1.031	0.934	0.974	0.931	0.97	0.973	0.974	1.042	1.033	1.039
Master Protein	Q3TWG5	Dynein cytoplasmic 1 light intermediate chain 1 OS=Mus musculus GN=Dync1li1 PE=2 SV=1	Dync1li1	235661	ENSMUSG00000032435	High	FALSE	39	680	38	0	307.494	2569.26	74.9522	352.498	9	cell division;cell organization and biogenesis;cellular component movement;metabolic process;regulation of biological process;transport	chromosome;cytoplasm;cytoskeleton;membrane	catalytic activity;motor activity;nucleotide binding;protein binding;RNA binding	Pf00005, Pf05783, Pf10662	0.989	1.005	0.919	0.93	1.005	1.005	0.932	0.925	1.009	1.016	0.939	0.957	0.954	0.982	1.011	1.003	0.922	0.907	0.997	1.007	0.928	0.939	0.928	0.947	0.999	1.011	1.015	1.021	1.005
Master Protein	Q68FF6	ARF GTPase-activating protein GIT1 OS=Mus musculus GN=Git1 PE=1 SV=1	Git1	216963	ENSMUSG00000011877	High	FALSE	43	523	38	0	307.262	2009.98	66.6234	29.142	11	regulation of biological process;response to stimulus	cytoplasm;cytosol;membrane	enzyme regulator activity;metal ion binding;protein binding	Pf00023, Pf01412, Pf08518, Pf12205, Pf12796, Pf13637, Pf13857	1.007	0.923	0.972	0.977	0.994	0.95	0.922	0.958	0.972	0.897	0.953	0.954	0.999	0.894	1.029	0.929	0.983	0.989	0.984	0.916	0.949	0.955	0.939	0.949	0.949	0.927	0.998	0.936	0.978
Master Protein	P32921	Tryptophan--tRNA ligase, cytoplasmic OS=Mus musculus GN=Wars PE=1 SV=2	Wars	22375	ENSMUSG00000021266	High	FALSE	34	587	34	0	307.215	2256.72	65.2807	106.227	12	metabolic process;regulation of biological process	cytoplasm;nucleus	catalytic activity;nucleotide binding	Pf00458, Pf00579	0.917	0.902	0.948	0.952	0.933	0.918	1.075	1.087	0.941	0.922	1.025	1.038	0.843	0.836	0.95	0.925	0.936	0.913	0.91	0.897	1.042	1.066	1.085	1.099	1.076	1.052	0.969	0.946	0.993
Master Protein	B0QZW1	Glutamate receptor 3 OS=Mus musculus GN=Gria3 PE=1 SV=1	Gria3	53623	ENSMUSG00000001986	High	FALSE	41	771	1	0	306.337	2758.31	45.1577	31.407	X	regulation of biological process;response to stimulus;transport	membrane	protein binding;receptor activity;signal transducer activity;transporter activity	Pf00060, Pf00497, Pf01094, Pf10613	1.024	1.021	0.974	0.963	1.024	1.022	0.907	0.948	1.019	0.988	0.928	0.916	0.989	0.992	1.026	1.026	0.985	0.998	1.09	1.05	0.914	0.927	0.915	0.91	0.984	0.994	1.083	1.046	1.086
Master Protein	Q8BXB3	Putative uncharacterized protein (Fragment) OS=Mus musculus GN=Slc8a1 PE=2 SV=1	Slc8a1	20541		High	FALSE	30	975	3	0	306.209	3729.3	44.051	302.027	17	cell communication;cellular homeostasis;regulation of biological process;response to stimulus;transport	cytosol;membrane;mitochondrion	metal ion binding;protein binding;transporter activity	Pf01699, Pf03160	0.813	1.05	1.035	0.962	0.999	0.993	0.863		0.826	0.934	0.956	0.961	1.032	1.181	0.872	1.019	0.842		0.808	0.85	1.04	0.944	0.97	0.921	1.023	1.045	0.879	0.9	0.936
Master Protein	Q3UYN2	Copine-6 OS=Mus musculus GN=Cpne6 PE=2 SV=1	Cpne6	12891	ENSMUSG00000022212	High	FALSE	39	1408	1	0	306.158	5242.69	76.259	176.828	14	cell differentiation;response to stimulus	cytoplasm;endosome;membrane	protein binding	Pf00092, Pf00168, Pf07002, Pf10138								0.88										0.838
Master Protein	O35136	Neural cell adhesion molecule 2 OS=Mus musculus GN=Ncam2 PE=2 SV=1	Ncam2	17968	ENSMUSG00000022762	High	FALSE	41	810	41	0	305.994	3064.61	47.5508	18.085	16		membrane	protein binding	Pf00041, Pf00047, Pf07679, Pf07686, Pf13895, Pf13927	0.944	0.934	0.95	0.944	0.913	0.909	0.975	0.972	1.045	1.042	0.955	0.958	0.897	0.906	0.976	0.956	0.926	0.92	1.054	1.037	0.966	0.971	0.923	0.924	0.993	1.012	1.089	1.083	1.05
Master Protein	Q8C1B7	Septin-11 OS=Mus musculus GN=Sept11 PE=1 SV=4	Sept11	52398	ENSMUSG00000058013	High	FALSE	36	1127	17	0	305.894	4065.04	67.0534	765.682	5	cell division;cell organization and biogenesis	cytoplasm;cytoskeleton	nucleotide binding;protein binding	Pf00735	0.996	1	0.971	0.946	0.987	0.951	0.97	0.973	1.09	1.074	1.04	1.008	0.961	0.961	0.99	0.986	0.943	0.942	1.154	1.136	1.025	1.006	0.987	0.957	1.078	1.055	1.134	1.113	1.106
Master Protein	Q8BKX1-4	Isoform 4 of Brain-specific angiogenesis inhibitor 1-associated protein 2 OS=Mus musculus GN=Baiap2	Baiap2	108100	ENSMUSG00000025372	High	FALSE	38	1032	1	0	305.742	3855.63	87.7593	82.768	11	cell organization and biogenesis;regulation of biological process;response to stimulus	cytoplasm;cytoskeleton;cytosol;membrane	protein binding	Pf00018, Pf07653, Pf08397, Pf14604			1.088	0.954	1.309		0.922	1.061			1.182	0.951					0.881	0.967			1.203	1.051	1.127	0.997	1.39				1.352
Master Protein	P55937	Golgin subfamily A member 3 OS=Mus musculus GN=Golga3 PE=1 SV=3	Golga3	269682		High	FALSE	51	228	50	0	305.709	899.626	40.6187	4.657	5	cell differentiation;development;metabolic process;regulation of biological process	cytoplasm;cytosol;Golgi;membrane;nucleus	catalytic activity;motor activity;protein binding	Pf01576, Pf02463, Pf04111, Pf04156, Pf07888, Pf09726, Pf10186, Pf12128, Pf13166	1.003	0.989	0.929	0.899	0.973	0.98	0.883	0.944	1.022	1.003	0.939	0.926	0.982	0.953	0.999	0.972	0.854	0.911	1.042	1.005	0.947	0.94	0.941	0.901	0.961	0.971	1.068	1.028	1.017
Master Protein	J3QQ16	Protein Col6a3 OS=Mus musculus GN=Col6a3 PE=4 SV=1	Col6a3	12835	ENSMUSG00000048126	High	FALSE	57	246	57	0	305.563	932.546	27.1199	1.822	1	regulation of biological process	membrane	enzyme regulator activity;protein binding	Pf00014, Pf00041, Pf00092, Pf01391, Pf13519, Pf13768	0.955	0.952	0.866	0.92	0.771	0.722	0.881	0.868	1.118	1.132	0.805	0.87	1.045	1.077	0.922	0.92	0.907	0.904	0.966	0.982	0.895	0.965	0.741	0.796	0.852	0.829	1.31	1.328	1.023
Master Protein	Q61481	Calcium/calmodulin-dependent 3',5'-cyclic nucleotide phosphodiesterase 1A OS=Mus musculus GN=Pde1a PE=2 SV=2	Pde1a	18573		High	FALSE	31	448	27	0	305.026	1933.86	60.531	115.591	2	metabolic process;regulation of biological process;response to stimulus	cytoplasm;nucleus	catalytic activity;metal ion binding;nucleotide binding;protein binding	Pf00233, Pf08499	1.02	1.035	1.009	0.986	1.036	1.029	0.918	0.929	1.031	1.02	0.948	0.94	1.001	1.017	1.055	1.053	0.892	0.934	1.01	1.016	0.959	0.966	0.958	0.932	1.046	1.029	1.062	1.064	1.063
Master Protein	Q0QER9	Isocitrate dehydrogenase 1 (Fragment) OS=Mus musculus GN=Idh1 PE=2 SV=1	Idh1	15926		High	FALSE	34	839	1	0	304.727	3012.14	77.5132	425.216	1	metabolic process;regulation of biological process;response to stimulus	cytoplasm;cytosol;mitochondrion	catalytic activity;metal ion binding;nucleotide binding;protein binding	Pf00180, Pf01960	0.836	0.881	0.955	0.802	0.805	0.822	0.929	0.81	0.868	0.854	1.224	1.071	0.748	0.853	0.85	0.867	0.976	0.899	0.939	0.918	1.005	0.949	1.167	1.064	0.842	0.909	0.953	0.904	0.775
Master Protein	Q9ERU9	E3 SUMO-protein ligase RanBP2 OS=Mus musculus GN=Ranbp2 PE=1 SV=2	Ranbp2	19386	ENSMUSG00000003226	High	FALSE	66	314	65	0	304.568	1088.56	23.5506	1.605	10	metabolic process;regulation of biological process;response to stimulus;transport	membrane;mitochondrion;nucleus	catalytic activity;metal ion binding;protein binding;RNA binding	Pf00160, Pf00515, Pf00638, Pf00641, Pf07719, Pf12185, Pf13414, Pf13432	0.924	0.876	0.904	0.94	0.94	0.912	0.961	0.919	0.966	0.912	0.947	0.994	0.899	0.836	0.928	0.87	0.932	0.918	0.967	0.925	0.926	0.993	0.947	0.993	0.94	0.91	0.973	0.931	0.955
Master Protein	E9PYH2	Cytosolic acyl coenzyme A thioester hydrolase OS=Mus musculus GN=Acot7 PE=4 SV=1	Acot7	70025	ENSMUSG00000028937	High	FALSE	27	1177	27	0	303.896	4377.14	56.5104	1109.34	4	metabolic process	cytoplasm;cytosol	catalytic activity;protein binding	Pf03061	0.988	0.986	0.949	0.989	0.956	0.955	1.013	1.038	1.04	1.034	0.992	1.053	0.973	0.967	0.996	0.984	0.928	0.946	1.002	1.003	0.977	1.023	0.971	1.039	0.985	0.986	1.029	1.028	1.002
Master Protein	B9EHJ3	Tight junction protein ZO-1 OS=Mus musculus GN=Tjp1 PE=1 SV=1	Tjp1	21872	ENSMUSG00000030516	High	FALSE	52	480	2	0	303.756	1791.53	34.4807	5.404	7		cell surface;cytoplasm;membrane;nucleus	protein binding	Pf00018, Pf00595, Pf00625, Pf00791, Pf07653, Pf13180	0.965	0.944	0.85	0.832	0.953	0.967	0.895	0.904	1.002	0.997	0.9	0.883	0.95	0.933	0.965	0.942	0.86	0.889	1.043	1.022	0.905	0.899	0.859	0.875	0.95	0.965	1.039	1.016	0.994
Master Protein	Q6ZQ08-4	Isoform 4 of CCR4-NOT transcription complex subunit 1 OS=Mus musculus GN=Cnot1	Cnot1	234594	ENSMUSG00000036550	High	FALSE	59	356	59	0	303.494	1199.44	26.3047	2.542	8	cell differentiation;development;metabolic process;regulation of biological process	cytoplasm;membrane;nucleus	catalytic activity;protein binding;RNA binding;structural molecule activity	Pf04054, Pf12842	0.954	0.997	0.971	0.968	1.001	0.985	0.919	0.92	0.952	1.008	0.987	0.986	0.948	0.981	0.981	0.999	0.942	0.94	0.983	1.03	0.982	0.969	0.969	0.976	0.975	0.954	0.97	1.01	1.016
Master Protein	P60843	Eukaryotic initiation factor 4A-I OS=Mus musculus GN=Eif4a1 PE=1 SV=1	Eif4a1	13681	ENSMUSG00000059796	High	FALSE	29	1210	12	0	303.184	4801.02	70.936	680.292	11	metabolic process;regulation of biological process	cytoplasm;membrane	catalytic activity;DNA binding;nucleotide binding;protein binding;RNA binding	Pf00270, Pf00271, Pf04851	1.012	0.997	0.909	0.881	0.994	1.009	0.899	0.891	1.039	1.043	0.965	0.963	0.988	0.982	1.025	1.006	0.87	0.881	1.061	1.054	0.974	0.958	0.962	0.937	0.981	1.017	1.062	1.048	1.007
Master Protein	Q6PGJ3	L1 cell adhesion molecule OS=Mus musculus GN=L1cam PE=2 SV=1	L1cam	16728	ENSMUSG00000031391	High	FALSE	35	604	34	0	303.107	2269.46	37.2518	9	X	cell differentiation;cell organization and biogenesis;cellular component movement;development;regulation of biological process;response to stimulus	cell surface;endosome;membrane	protein binding	Pf00041, Pf00047, Pf07679, Pf07686, Pf08205, Pf13882, Pf13895, Pf13927	0.987	0.996	0.978	0.963	0.992	0.983	0.858	0.869	1.046	1.048	0.954	0.941	0.962	0.971	1.02	1.025	0.976	0.983	1.119	1.115	0.902	0.896	0.921	0.91	0.996	0.993	1.055	1.053	0.977
Master Protein	G5E8R0	Tropomyosin 1, alpha, isoform CRA_i OS=Mus musculus GN=Tpm1 PE=3 SV=1	Tpm1	22003	ENSMUSG00000032366	High	FALSE	41	1252	4	0	303.026	4677.01	85.3061	3510.19	9	cell organization and biogenesis;cellular component movement;regulation of biological process;response to stimulus	cytoplasm;cytoskeleton	protein binding;structural molecule activity	Pf00261, Pf12718	0.989	1.008	0.94	0.915	1.007	1.009	0.88	0.871	0.961	1.001	0.876	0.863	0.955	1.01	0.999	1.035	0.938	0.925	0.989	1.009	0.892	0.898	0.896	0.887	0.983	0.987	1.021	1.022	1.035
Master Protein	Q3U1N0	Coronin OS=Mus musculus GN=Coro1a PE=2 SV=1	Coro1a	12721	ENSMUSG00000030707	High	FALSE	35	1078	34	0	302.807	4090.97	64.4252	907.518	7	cell organization and biogenesis;cellular component movement;regulation of biological process;response to stimulus;transport	cytoplasm;cytoskeleton;cytosol;endosome;membrane	protein binding;RNA binding	Pf00400, Pf03980, Pf08953, Pf08954	0.971	0.964	1.019	0.982	0.969	0.952	0.961	0.986	0.975	0.961	1.018	0.985	0.898	0.885	0.979	0.975	1.004	1.016	1.026	1	1.029	1	0.998	0.969	0.956	0.938	1.011	0.989	1.027
Master Protein	Q7TMK9-2	Isoform 2 of Heterogeneous nuclear ribonucleoprotein Q OS=Mus musculus GN=Syncrip	Syncrip	56403	ENSMUSG00000032423	High	FALSE	35	616	1	0	302.698	2550.82	58.363	63.686	9	cell differentiation;metabolic process;regulation of biological process;response to stimulus	cytoplasm;endoplasmic reticulum;membrane;nucleus;spliceosomal complex	nucleotide binding;RNA binding	Pf00076, Pf13893, Pf14259			0.959	0.93			0.981	0.85			0.948	0.954					0.986	0.965			0.852	0.903	0.825	0.83
Master Protein	Q9CYT6	Adenylyl cyclase-associated protein 2 OS=Mus musculus GN=Cap2 PE=1 SV=1	Cap2	67252	ENSMUSG00000021373	High	FALSE	29	735	28	0	301.997	2861.51	63.4454	131.194	13	cell organization and biogenesis	membrane	protein binding	Pf01213, Pf07986, Pf08603	0.972	1.008	0.943	0.942	1.027	1.015	0.94	0.945	0.998	1.017	0.952	0.97	0.978	1.014	0.982	1.008	0.924	0.935	0.999	1.037	0.931	0.946	0.947	0.954	1.019	1.007	1.022	1.046	1.075
Master Protein	P62196	26S protease regulatory subunit 8 OS=Mus musculus GN=Psmc5 PE=1 SV=1	Psmc5	19184	ENSMUSG00000020708	High	FALSE	35	681	33	0	301.995	2722.71	72.6601	315.228	11	metabolic process;regulation of biological process;response to stimulus	cytoplasm;membrane;nucleus;proteasome	catalytic activity;nucleotide binding;protein binding;RNA binding	Pf00004, Pf00910, Pf01057, Pf01078, Pf05496, Pf06068, Pf06414, Pf07724, Pf07726, Pf07728, Pf13191, Pf13207, Pf13401	0.965	0.968	0.905	0.914	0.96	0.936	0.925	0.944	1	0.991	0.94	0.963	0.936	0.94	0.98	0.976	0.901	0.906	0.995	0.997	0.923	0.94	0.928	0.965	0.967	0.965	0.996	0.996	0.996
Master Protein	B8QI36	Liprin-alpha 4 OS=Mus musculus GN=Ppfia4 PE=2 SV=1	Ppfia4	68507	ENSMUSG00000026458	High	FALSE	47	451	30	0	301.666	1599.77	42.46	9.642	1	cell organization and biogenesis;metabolic process;regulation of biological process	cytoplasm;cytoskeleton	catalytic activity;motor activity;protein binding	Pf00261, Pf00536, Pf00769, Pf01576, Pf02463, Pf04012, Pf04111, Pf04156, Pf05557, Pf05622, Pf05701, Pf05911, Pf06160, Pf07647, Pf09726, Pf09728, Pf09763, Pf10174, Pf12128, Pf13514	0.996	1.024	0.947	0.932	1.001	1.034	0.91	0.889	0.994	0.993	0.936	0.946	0.996	0.979	1.026	1.035	0.913	0.903	0.949	0.959	0.951	0.942	0.929	0.931	0.976	0.993	1.022	1.014	1.01
Master Protein	P50518	V-type proton ATPase subunit E 1 OS=Mus musculus GN=Atp6v1e1 PE=1 SV=2	Atp6v1e1	11973	ENSMUSG00000019210	High	FALSE	29	1949	29	0	301.507	5819.75	73.4513	42168.7	6	metabolic process;transport	cytoplasm;cytosol;endosome;membrane;mitochondrion	catalytic activity;protein binding;transporter activity	Pf01991	0.995	0.994	0.94	0.939	0.979	0.957	0.878	0.889	0.988	0.99	0.94	0.932	0.978	0.982	1.012	1.005	0.888	0.902	0.948	0.951	0.923	0.925	0.919	0.917	0.976	0.957	0.993	0.992	1.013
Master Protein	Q9QYB5	Gamma-adducin OS=Mus musculus GN=Add3 PE=1 SV=2	Add3	27360	ENSMUSG00000025026	High	FALSE	29	719	4	0	301.466	2948.37	43.0595	85.975	19	response to stimulus	chromosome;cytoplasm;cytoskeleton;membrane	protein binding;structural molecule activity	Pf00596	0.961	0.986	1.047	0.955	0.953	0.937	0.861	0.872	0.974	0.987	0.956	0.979	0.961	0.978	0.959	0.985	0.893	0.867	0.978	0.979	0.953	0.975	0.936	0.965	0.911	0.91	0.985	0.997	0.954
Master Protein	P63085	Mitogen-activated protein kinase 1 OS=Mus musculus GN=Mapk1 PE=1 SV=3	Mapk1	26413	ENSMUSG00000063358	High	FALSE	26	1277	18	0	300.922	4839.01	66.7598	1104.3	16	cell death;cell differentiation;cell proliferation;metabolic process;regulation of biological process;response to stimulus;transport	cytoplasm;cytoskeleton;cytosol;endosome;Golgi;membrane;mitochondrion;nucleus	catalytic activity;nucleotide binding;protein binding;signal transducer activity	Pf00069, Pf01636, Pf07714	0.937	0.935	0.953	0.926	0.921	0.893	0.859	0.866	0.92	0.92	0.946	0.932	0.915	0.933	0.955	0.965	0.935	0.936	0.924	0.915	0.938	0.931	0.934	0.919	0.858	0.854	0.978	0.969	0.907
Master Protein	Q8VDC3	Cytoplasmic aconitase OS=Mus musculus GN=aco1 PE=4 SV=1	Aco1	11428		High	FALSE	43	433	42	0	300.685	1763.94	55.0612	19.309	4	cellular homeostasis;metabolic process;regulation of biological process;response to stimulus;transport	cytoplasm;cytosol;endoplasmic reticulum;Golgi;mitochondrion	catalytic activity;metal ion binding;RNA binding	Pf00330, Pf00694	0.956	0.991	0.892	0.874	0.962	0.94	0.973	0.969	1	1.045	0.983	0.977	0.938	0.967	0.941	1.001	0.895	0.873	1.003	1.044	0.948	0.948	0.943	0.95	0.989	0.969	0.984	1.038	0.975
Master Protein	Q9JKF1	Ras GTPase-activating-like protein IQGAP1 OS=Mus musculus GN=Iqgap1 PE=1 SV=2	Iqgap1	29875	ENSMUSG00000030536	High	FALSE	48	302	44	0	300.592	1169.76	37.417	4.49	7	cell growth;regulation of biological process;response to stimulus	cytoplasm;cytoskeleton;membrane	enzyme regulator activity;protein binding	Pf00307, Pf00616, Pf03836, Pf11016	0.883	0.887	0.827	0.809	0.885	0.821	0.888	0.914	0.968	0.978	0.89	0.892	0.941	0.927	0.896	0.884	0.802	0.833	0.946	0.964	0.932	0.937	0.838	0.827	0.912	0.873	0.952	0.965	0.896
Master Protein	Q9JL26	Formin-like protein 1 OS=Mus musculus GN=Fmnl1 PE=1 SV=1	Fmnl1	57778	ENSMUSG00000055805	High	FALSE	52	304	1	0	300.401	1113.12	47.8976	13.101	11	cell organization and biogenesis;cellular component movement;regulation of biological process	cytoplasm;cytosol;membrane	protein binding	Pf02181, Pf06367, Pf06371, Pf13851	0.968	1	0.945	0.954	0.988	0.978	0.968	0.969	0.963	0.996	0.95	0.975	0.957	0.966	0.964	1.008	0.949	0.938	0.937	0.986	0.992	0.997	0.93	0.956	0.959	0.953	0.957	0.992	1.016
Master Protein	Q811D0	Disks large homolog 1 OS=Mus musculus GN=Dlg1 PE=1 SV=1	Dlg1	13383	ENSMUSG00000022770	High	FALSE	42	707	5	0	300.258	2591.52	50.8287	30.623	16	cell communication;cell organization and biogenesis;cell proliferation;metabolic process;regulation of biological process;response to stimulus	cytoplasm;cytosol;endoplasmic reticulum;Golgi;membrane;nucleus	catalytic activity;protein binding;structural molecule activity	Pf00018, Pf00595, Pf00625, Pf07653, Pf09058, Pf10600, Pf10608	0.953	0.96	0.933	0.905	0.931	0.935	0.93	0.925	1.038	1.033	0.986	0.966	0.905	0.918	0.966	0.962	0.898	0.875	1.06	1.051	0.97	0.97	0.959	0.952	0.983	1.003	1.039	1.034	1.034
Master Protein	Q9R1T4	Septin-6 OS=Mus musculus GN=Sept6 PE=1 SV=4	Sept6	56526	ENSMUSG00000050379	High	FALSE	34	1042	18	0	299.341	4033.11	68.894	586.802	X	cell division	chromosome;cytoplasm;cytoskeleton	nucleotide binding;protein binding	Pf00735	0.931	0.959	1.032	1.022	0.938	0.941	1.019	1.047	1.005	1.034	1.034	1.058	0.898	0.926	0.923	0.962	0.965	0.985	1.016	1.045	1.046	1.041	1.021	1.024	1.035	1.044	1.028	1.056	1.103
Master Protein	Q8BP43	Tropomyosin 1, alpha, isoform CRA_c OS=Mus musculus GN=Tpm1 PE=1 SV=1	Tpm1	22003	ENSMUSG00000032366	High	FALSE	40	974	2	0	298.676	3560.24	77.1127	2226.54	9	cell organization and biogenesis;cellular component movement;regulation of biological process;response to stimulus	cytoplasm;cytoskeleton	protein binding;structural molecule activity	Pf00261, Pf12718	0.928	0.939	0.901	0.9	0.941	0.956	0.883	0.918	1.026	1.037	0.902	0.866	0.913	0.966	0.909	0.944	0.917	0.907	0.989	1.02	1.004	0.956	0.793	0.798	1.015	1.07	1.107	1.132	1.069
Master Protein	Q9Z1L5	Voltage-dependent calcium channel subunit alpha-2/delta-3 OS=Mus musculus GN=Cacna2d3 PE=1 SV=1	Cacna2d3	12294	ENSMUSG00000021991	High	FALSE	37	478	37	0	298.559	1888.89	40.6966	13.774	14	regulation of biological process;transport	membrane	metal ion binding;transporter activity	Pf00092, Pf02743, Pf08399, Pf13519, Pf13768	1.028	1.04	0.989	0.981	1.021	1.034	0.885	0.902	1.02	1.004	0.954	0.973	1.016	1.019	1.043	1.035	0.982	0.983	1.031	1.021	0.947	0.967	0.961	0.965	0.94	0.97	1.008	1.01	1.004
Master Protein	P70414	Sodium/calcium exchanger 1 OS=Mus musculus GN=Slc8a1 PE=1 SV=1	Slc8a1	20541		High	FALSE	32	773	2	0	298.539	2985.36	34.3299	68.519	17	cell communication;cellular homeostasis;regulation of biological process;response to stimulus;transport	cytosol;membrane;mitochondrion	metal ion binding;protein binding;transporter activity	Pf01699, Pf03160	1.07			0.919			0.935	1.011	1.031			0.921	1.175		1.048		0.897	0.91	0.942			0.953		0.87			1.009
Master Protein	B1AX58	Plastin-3 OS=Mus musculus GN=Pls3 PE=4 SV=1	Pls3	102866	ENSMUSG00000016382	High	FALSE	39	565	31	0	298.27	2176.03	66.6667	43.788	X		cytoplasm	metal ion binding;protein binding	Pf00307, Pf13499	0.939	0.952	0.929	0.911	0.909	0.918	0.999	0.988	1.02	1.026	0.988	0.978	0.94	0.952	0.95	0.952	0.943	0.91	0.963	0.972	0.965	0.954	0.971	0.966	0.938	0.963	1.02	1.019	0.951
Master Protein	Q3UEE7	Putative uncharacterized protein OS=Mus musculus GN=Apoe PE=2 SV=1	Apoe	11816		High	FALSE	29	1659	4	0	298.116	5680.35	70.418	8911.51	7	cell organization and biogenesis;cellular homeostasis;metabolic process;regulation of biological process;response to stimulus;transport	cell surface;cytoplasm;endoplasmic reticulum;endosome;extracellular;Golgi;membrane;nucleus;vacuole	antioxidant activity;catalytic activity;enzyme regulator activity;metal ion binding;protein binding;transporter activity	Pf01442, Pf02720	0.471	0.481	0.509	0.515	0.502	0.49	0.921	1.042	1.074	0.919	1.14	1.139	0.56	0.566	0.605	0.572	0.506	0.522	0.654	0.653	0.695	0.719	1.08	1.098	0.587	0.596	0.466	0.5	0.614
Master Protein	D3Z576	Filamin-C OS=Mus musculus GN=Flnc PE=1 SV=1	Flnc		ENSMUSG00000068699	High	FALSE	58	265	45	0	297.86	904.672	27.4388	1.813	6			protein binding	Pf00307, Pf00630	0.811	0.819	0.744	0.74	0.859	0.863	0.711	0.78	0.854	0.888	0.833	0.862	0.791	0.795	0.824	0.817	0.61	0.663	0.845	0.86	0.85	0.891	0.766	0.833	0.832	0.879	0.866	0.891	0.845
Master Protein	Q3UID0	SWI/SNF complex subunit SMARCC2 OS=Mus musculus GN=Smarcc2 PE=1 SV=1	Smarcc2	68094	ENSMUSG00000025369	High	FALSE	48	406	37	0	297.705	1563.04	44.1593	17.139	10	cell organization and biogenesis;metabolic process;regulation of biological process	nucleus	DNA binding;protein binding	Pf04433	0.919	0.99	0.912	0.915	0.974	0.968	0.897	0.89	0.928	1.008	0.968	0.962	0.877	1	0.919	0.994	0.912	0.881	0.942	1.017	0.928	0.954	0.914	0.941	0.943	0.962	0.934	1.007	0.98
Master Protein	B7ZNL3	Tpm1 protein OS=Mus musculus GN=Tpm1 PE=2 SV=1	Tpm1	22003	ENSMUSG00000032366	High	FALSE	42	1092	7	0	297.304	3840.36	78.8732	3006.88	9	cell organization and biogenesis;cellular component movement;regulation of biological process;response to stimulus	cytoplasm;cytoskeleton	protein binding;structural molecule activity	Pf00261, Pf12718	0.958	0.93	0.923	0.908	0.931	0.889	0.923	0.903	1.017	0.98	0.867	0.849	0.896	0.855	0.927	0.888	1.022	1.012	1	0.953	0.945	0.916	0.836	0.8	0.961	0.924	1.132	1.085	1.051
Master Protein	P31938	Dual specificity mitogen-activated protein kinase kinase 1 OS=Mus musculus GN=Map2k1 PE=1 SV=2	Map2k1	26395	ENSMUSG00000004936	High	FALSE	26	770	19	0	297.118	3176.33	78.3715	1244.2	9	cell differentiation;cell organization and biogenesis;cell proliferation;cellular component movement;metabolic process;regulation of biological process;response to stimulus;transport	cytoplasm;cytoskeleton;cytosol;endoplasmic reticulum;endosome;Golgi;membrane;mitochondrion;nucleus	catalytic activity;enzyme regulator activity;nucleotide binding;protein binding;signal transducer activity	Pf00069, Pf07714	0.961	0.959	0.967	0.968	1.02	1.017	0.857	0.896	0.942	0.937	0.975	0.953	0.995	0.973	0.988	0.988	0.926	0.936	0.928	0.927	0.931	0.934	0.938	0.949	0.954	0.968	1.002	0.994	0.993
Master Protein	B1AQZ0	Septin-8 OS=Mus musculus GN=Sept8 PE=1 SV=1	Sept8	20362	ENSMUSG00000018398	High	FALSE	34	1078	2	0	297.091	4049.18	66.1157	390.375	11		cytoplasm;cytoskeleton	nucleotide binding	Pf00735	0.994	0.976	1.08	1.076	0.837	1.046	0.994	0.963	0.977	0.941	1.121	1.079	1.103	1.083	0.924	0.946	0.836	0.875	1.013	1.008	1.104	1.109	1.189	1.146	0.892	1.144	1.025	1.05	0.93
Master Protein	Q60634	Flotillin-2 OS=Mus musculus GN=Flot2 PE=1 SV=2	Flot2	14252	ENSMUSG00000061981	High	FALSE	30	670	2	0	297.075	2723.06	69.8598	85.975	11	cell organization and biogenesis;regulation of biological process	cytoskeleton;endosome;membrane	protein binding	Pf01145	0.987	0.992	0.99	0.982	0.992	0.97	0.863	0.899	1.072	1.072	1.007	0.997	0.997	1.022	1.005	0.997	0.918	0.948	1.051	1.062	0.925	0.919	0.928	0.923	1.019	1.023	1.06	1.073	0.957
Master Protein	Q3THP1	Putative uncharacterized protein OS=Mus musculus GN=Dpp3 PE=2 SV=1	Dpp3	75221		High	FALSE	39	619	3	0	297.02	2464.66	66.6667	23.421	19	metabolic process	cytoplasm;membrane	catalytic activity;metal ion binding	Pf03571	0.91	0.909	0.929	0.936	0.91	0.922	0.949	0.931	0.922	0.932	0.942	0.946	0.973	0.953	0.986	0.982	0.807	0.805	0.965	0.981	0.942	0.951	0.945	0.978	0.908	0.907	1.045	1.045	1.013
Master Protein	Q80YA9	Connector enhancer of kinase suppressor of ras 2 OS=Mus musculus GN=Cnksr2 PE=1 SV=1	Cnksr2	245684	ENSMUSG00000025658	High	FALSE	41	478	1	0	296.963	1871.14	43.314	14.252	X	regulation of biological process;response to stimulus	cytoplasm;Golgi;membrane	protein binding	Pf00169, Pf00536, Pf00595, Pf06663, Pf07647, Pf10534, Pf15413	1.035	1.049	1.002	0.964	0.995	0.995	0.959	0.957	0.932	0.939	0.928	0.913	0.974	0.987	1.036	1.054	1.015	1.019	1.001	1.011	1.056	1.011	1.058	1.007	0.899	0.916	0.994	1.002	0.958
Master Protein	P70232	Neural cell adhesion molecule L1-like protein OS=Mus musculus GN=Chl1 PE=1 SV=2	Chl1	12661	ENSMUSG00000030077	High	FALSE	39	431	2	0	296.688	1626.17	46.2366	9.35	6	cell differentiation;cell organization and biogenesis;cellular component movement;development;regulation of biological process;response to stimulus	extracellular;membrane	protein binding	Pf00041, Pf00047, Pf07679, Pf07686, Pf13882, Pf13895, Pf13927	1.002	0.983	0.921	0.913	0.975	1	0.927	0.979	1.099	1.068	0.919	0.92	1.006	0.987	1.046	1.013	0.874	0.878	1.033	0.998	0.936	0.94	0.886	0.901	0.913	0.946	0.992	0.978	0.95
Master Protein	D3Z3B8	Disks large homolog 1 OS=Mus musculus GN=Dlg1 PE=1 SV=1	Dlg1	13383	ENSMUSG00000022770	High	FALSE	41	649	4	0	296.6	2422.86	53.1175	32.322	16	cell communication;cell organization and biogenesis;cell proliferation;metabolic process;regulation of biological process;response to stimulus	cytoplasm;cytosol;endoplasmic reticulum;Golgi;membrane;nucleus	catalytic activity;protein binding;structural molecule activity	Pf00018, Pf00595, Pf00625, Pf07653, Pf10600	0.993		0.937	0.868	0.875	0.887	0.922	0.855	1.032		0.943	0.864	0.949		1.065		0.889	0.866	1.002		0.901	0.902	0.764	0.888	1.065	0.976	1.035		1.13
Master Protein	G3X9K3	Brefeldin A-inhibited guanine nucleotide-exchange protein 1 OS=Mus musculus GN=Arfgef1 PE=2 SV=1	Arfgef1	211673	ENSMUSG00000067851	High	FALSE	54	326	40	0	296.578	1084.16	35.1571	4.244	1	cell organization and biogenesis;regulation of biological process;transport	cytoplasm;cytosol;Golgi;membrane;nucleus	protein binding	Pf01369, Pf09324, Pf12783	0.92	0.937	0.995	0.966	0.975	0.934	0.967	0.973	0.979	0.999	1.049	1.018	0.875	0.912	0.952	0.958	0.936	0.945	0.98	0.979	1.028	1.042	1.038	1.028	0.934	0.924	0.956	0.977	0.968
Master Protein	Q3TDD9	Protein phosphatase 1 regulatory subunit 21 OS=Mus musculus GN=Ppp1r21 PE=2 SV=2	Klraq1; Ppp1r21	73825	ENSMUSG00000034709	High	FALSE	46	366	46	0	296.459	1463.95	58.9744	20.544	17		membrane	protein binding	Pf10205, Pf10212	0.959	0.982	0.932	0.91	0.961	0.957	0.931	0.904	0.981	1.018	0.946	0.931	0.916	0.966	0.939	0.981	0.919	0.885	0.967	0.972	0.921	0.902	0.91	0.891	0.953	0.962	0.99	0.998	0.992
Master Protein	P39447	Tight junction protein ZO-1 OS=Mus musculus GN=Tjp1 PE=1 SV=2	Tjp1	21872	ENSMUSG00000030516	High	FALSE	51	460	1	0	295.897	1740.93	32.6074	5.247	7		cell surface;cytoplasm;membrane;nucleus	protein binding	Pf00018, Pf00595, Pf00625, Pf00791, Pf07653, Pf13180		0.98								0.964				0.954		0.908				1.06								1.037
Master Protein	Q8BG05	Heterogeneous nuclear ribonucleoprotein A3 OS=Mus musculus GN=Hnrnpa3 PE=1 SV=1	Hnrnpa3	229279	ENSMUSG00000059005	High	FALSE	32	1181	28	0	295.829	4351.02	51.9789	3980.07	2	metabolic process;transport	cytoplasm;nucleus;spliceosomal complex	nucleotide binding;RNA binding;transporter activity	Pf00076, Pf13893, Pf14259	0.977	0.968	0.91	0.911	0.969	0.973	0.848	0.872	0.995	0.959	0.928	0.923	0.947	0.929	0.988	0.973	0.883	0.895	1.001	0.965	0.897	0.9	0.918	0.913	0.947	0.944	0.989	0.958	0.977
Master Protein	Q8K212	Phosphofurin acidic cluster sorting protein 1 OS=Mus musculus GN=Pacs1 PE=2 SV=2	Pacs1	107975	ENSMUSG00000024855	High	FALSE	43	521	41	0	295.797	1981.99	47.8668	27.118	19	cell organization and biogenesis;transport	Golgi	protein binding	Pf10254	1.001	1.031	0.959	0.954	0.98	0.995	0.952	0.944	1.022	1.05	0.974	0.976	0.947	0.97	0.996	1.017	0.969	0.953	1.019	1.056	0.959	0.957	0.958	0.959	0.975	0.998	1.034	1.061	1.026
Master Protein	Q3UDD5	Putative uncharacterized protein OS=Mus musculus GN=Dpp3 PE=2 SV=1	Dpp3	75221		High	FALSE	38	555	2	0	295.375	2295.26	65.1762	22.3	19	metabolic process	cytoplasm;membrane	catalytic activity;metal ion binding	Pf03571	1.075	1.208	0.168	0.192	1.105	1.159	0.977	1.039	1.58	2.096	0.931	1.047	1.04	1.174	1.273	1.323	1.078	1.082	1.125	1.3	0.938	1.048	0.148	0.201	1.648	1.795	0.372	0.348	1.103
Master Protein	Q571A2	MKIAA4106 protein (Fragment) OS=Mus musculus GN=Cul2 PE=2 SV=1	Cul2	71745		High	FALSE	43	474	43	0	295.333	1627.21	58.8235	34.401	18	metabolic process		catalytic activity;protein binding	Pf00888, Pf10557	0.932	0.939	0.899	0.898	0.957	0.903	0.974	0.958	0.995	0.965	0.956	0.977	0.894	0.902	0.953	0.954	0.94	0.933	0.995	0.971	0.919	0.935	0.924	0.941	0.998	0.933	1.02	0.978	1.008
Master Protein	E0CZ72	Kinesin-like protein KIF2A OS=Mus musculus GN=Kif2a PE=1 SV=1	Kif2a	16563	ENSMUSG00000021693	High	FALSE	37	638	3	0	294.993	2431.93	54.5087	29.858	13	cell differentiation;cell division;cell organization and biogenesis;cellular component movement;development;metabolic process	cytoplasm;cytoskeleton;membrane;nucleus;vacuole	catalytic activity;motor activity;nucleotide binding;protein binding	Pf00225	1.037	1.026	0.952	0.945	0.991	0.976	0.972	1.003	1.062	1.045	1.001	0.981	1.005	1.004	1.033	1.03	0.934	0.974	1.061	1.047	0.993	0.973	0.963	0.943	0.995	0.999	1.076	1.05	1.017
Master Protein	P24527	Leukotriene A-4 hydrolase OS=Mus musculus GN=Lta4h PE=1 SV=4	Lta4h	16993	ENSMUSG00000015889	High	FALSE	38	653	38	0	294.851	2518.17	64.9755	52.915	10	cell differentiation;metabolic process;response to stimulus	cytoplasm;membrane;nucleus	catalytic activity;metal ion binding;protein binding;RNA binding	Pf01433, Pf09127, Pf13485	0.96	0.944	0.9	0.885	0.984	0.976	0.959	0.959	1.028	1.025	0.963	0.967	0.95	0.937	0.997	0.974	0.894	0.884	1.026	1.009	0.974	0.972	0.975	0.975	1.016	1.004	1.058	1.052	1.014
Master Protein	P15105	Glutamine synthetase OS=Mus musculus GN=Glul PE=1 SV=6	Glul	14645	ENSMUSG00000026473	High	FALSE	29	3371	14	0	294.291	11269.4	72.9223	2153.43	1	cell communication;cell organization and biogenesis;cell proliferation;metabolic process;regulation of biological process;response to stimulus	cytoplasm;endoplasmic reticulum;mitochondrion;nucleus	catalytic activity;metal ion binding;nucleotide binding;protein binding	Pf00120, Pf03951	0.822	0.803	0.936	0.921	0.809	0.823	0.935	0.96	0.85	0.816	1.024	1.008	0.765	0.745	0.817	0.787	0.947	0.961	0.825	0.798	0.995	0.989	1.041	1.023	0.8	0.821	0.887	0.86	0.883
Master Protein	Q7TN74	Neurabin I OS=Mus musculus GN=Ppp1r9a PE=1 SV=1	Ppp1r9a	243725	ENSMUSG00000032827	High	FALSE	51	515	49	0	294.227	1853.53	49.1324	18.307	6	cell organization and biogenesis;regulation of biological process;response to stimulus	cytoskeleton;cytosol	protein binding	Pf00536, Pf00595, Pf07106, Pf07647, Pf14817	1.049	1.052	0.957	0.965	1.038	1.043	0.909	0.909	1.029	1.025	0.972	0.985	1.01	0.986	1.054	1.056	0.957	0.963	1.061	1.032	0.952	0.974	0.934	0.96	1.016	1.008	1.065	1.059	1.062
Master Protein	E9PYT0	Rho GTPase-activating protein 5 OS=Mus musculus GN=Arhgap5 PE=1 SV=1	Arhgap5	11855	ENSMUSG00000035133	High	FALSE	53	300	53	0	293.745	1174.28	45.0432	6.032	12	cell organization and biogenesis;regulation of biological process;response to stimulus	cytoplasm;endoplasmic reticulum;membrane	enzyme regulator activity;nucleotide binding;protein binding	Pf00071, Pf00620, Pf01846	0.96	0.968	0.885	0.892	0.988	0.961	0.933	0.92	1.019	0.994	0.949	0.967	0.943	0.994	0.96	0.967	0.881	0.864	1.04	1.024	0.94	0.95	0.927	0.922	0.981	0.975	1.013	1.01	1.003
Master Protein	P60879-2	Isoform 2 of Synaptosomal-associated protein 25 OS=Mus musculus GN=Snap25	Snap25	20614	ENSMUSG00000027273	High	FALSE	25	2704	2	0	293.705	10463.1	77.6699	37274.9	2	cell organization and biogenesis;regulation of biological process;response to stimulus;transport	cytoplasm;cytoskeleton;cytosol;endosome;membrane	protein binding;transporter activity	Pf00835, Pf05739	0.957	0.952	0.917	0.929	0.996	0.975	0.873	0.86	0.928	0.884	0.912	0.884	1.009	1.01	0.985	0.992	0.9	0.838	0.973	0.972	0.928	1.015	0.846	0.97	1.011	1.022	0.95	0.958	0.955
Master Protein	Q80YA9-2	Isoform 2 of Connector enhancer of kinase suppressor of ras 2 OS=Mus musculus GN=Cnksr2	Cnksr2	245684		High	FALSE	41	460	1	0	293.398	1816.75	46.3886	16.783	X	regulation of biological process;response to stimulus	cytoplasm;Golgi;membrane	protein binding	Pf00169, Pf00536, Pf00595, Pf06663, Pf07647, Pf10534, Pf15413		1.028		0.966						1.103		0.948		1.05		1.027				1.073		0.956		0.927				1.074
Master Protein	Q8VCW8	Acyl-CoA synthetase family member 2, mitochondrial OS=Mus musculus GN=Acsf2 PE=1 SV=1	Acsf2	264895	ENSMUSG00000076435	High	FALSE	30	446	30	0	293.034	2020.96	59.0244	74.646	11	metabolic process	mitochondrion	catalytic activity;nucleotide binding	Pf00501, Pf13193	0.885	0.887	0.907	0.887	0.905	0.886	0.899	0.897	0.933	0.912	0.982	0.968	0.882	0.873	0.861	0.857	0.899	0.896	0.94	0.924	0.928	0.904	0.932	0.911	0.882	0.87	0.962	0.942	0.915
Master Protein	A2VDF5	Gria3 protein OS=Mus musculus GN=Gria3 PE=2 SV=1	Gria3	53623		High	FALSE	38	723	2	0	293.012	2625.95	44.7072	25.64	X	regulation of biological process;response to stimulus;transport	membrane	protein binding;receptor activity;signal transducer activity;transporter activity	Pf00060, Pf00497, Pf01094, Pf10613	0.977	0.97	1.038	0.944	0.985	1.015	0.882	0.896	0.995	0.992	0.974	0.892	0.937	0.952	1.007	0.998	0.993	0.962	1.108	1.091	0.971	0.923	0.926	0.892	1.017	0.998	1.104	1.081	1.179
Master Protein	P27671	Ras-specific guanine nucleotide-releasing factor 1 OS=Mus musculus GN=Rasgrf1 PE=1 SV=2	Rasgrf1	19417	ENSMUSG00000032356	High	FALSE	41	337	38	0	292.834	1309.74	42.8685	6.049	9	cell organization and biogenesis;cell proliferation;regulation of biological process;response to stimulus	cytoplasm;cytosol;membrane	protein binding	Pf00169, Pf00617, Pf00618, Pf00621	0.998	1.032	1.007	0.966	1.047	1.05	0.925	0.965	0.995	1.008	0.963	0.934	0.997	1.021	1.031	1.04	0.956	0.98	1.008	1.027	0.99	0.966	0.983	0.964	0.961	0.969	1.005	1.052	1.001
Master Protein	Q9WTX6	Cullin-1 OS=Mus musculus GN=Cul1 PE=1 SV=1	Cul1	26965	ENSMUSG00000029686	High	FALSE	42	412	42	0	292.788	1567.68	55.5412	20.544	6	cell death;cell proliferation;metabolic process		catalytic activity;protein binding	Pf00888, Pf10557	0.961	0.972	0.965	0.953	0.939	0.983	0.986	0.983	0.986	0.994	1.013	1.003	0.959	0.957	0.963	0.956	0.918	0.921	0.984	0.986	1.003	1.001	0.983	0.974	0.938	1	1	1.004	0.978
Master Protein	Q60932	Voltage-dependent anion-selective channel protein 1 OS=Mus musculus GN=Vdac1 PE=1 SV=3	Vdac1	22333	ENSMUSG00000020402	High	FALSE	26	5125	1	0	292.515	22140	82.0946	1290.55	11	cell communication;cell death;cell differentiation;defense response;regulation of biological process;response to stimulus;transport	membrane;mitochondrion;nucleus	nucleotide binding;protein binding;transporter activity	Pf01459	0.986	0.98	0.988	0.949	0.99	0.982	0.951	0.958	1.018	1.003	0.992	0.995	1	0.999	0.972	0.962	0.905	0.905	0.994	0.981	0.99	0.984	0.978	0.976	1.018	1.019	1.015	1.002	1.029
Master Protein	P33175	Kinesin heavy chain isoform 5A OS=Mus musculus GN=Kif5a PE=1 SV=3	Kif5a	16572	ENSMUSG00000074657	High	FALSE	47	531	28	0	292.451	2097.06	49.4645	10.522	10	cellular component movement;metabolic process;transport	cytoplasm;cytoskeleton;membrane	catalytic activity;motor activity;nucleotide binding;protein binding	Pf00225, Pf04111, Pf04156, Pf12128	0.957	0.963	0.938	0.881	0.987	1.003	0.945	0.985	1.019	1.009	0.987	0.951	0.982	0.959	0.984	0.967	0.818	0.825	0.972	0.957	0.973	0.949	0.971	0.937	1.024	1.047	1.003	0.978	1.006
Master Protein	H7BX46	Rho GTPase-activating protein 39 OS=Mus musculus GN=Arhgap39 PE=1 SV=1	Arhgap39	223666	ENSMUSG00000033697	High	FALSE	48	437	48	0	292.403	1588.27	54.3599	10.428	15	regulation of biological process;response to stimulus	cytoskeleton;nucleus	protein binding	Pf00620, Pf00784	1.031	1.042	0.949	0.928	1.085	1.083	0.927	0.965	0.984	0.997	0.912	0.918	1.009	1.03	1.041	1.043	0.969	1.016	1.004	1.009	0.926	0.918	0.938	0.929	0.986	1.007	0.999	1.02	1.023
Master Protein	Q3UH60	Disco-interacting protein 2 homolog B OS=Mus musculus GN=Dip2b PE=1 SV=1	Dip2b	239667	ENSMUSG00000023026	High	FALSE	47	390	8	0	292.259	1470.11	39.4536	6.499	15	metabolic process	cytoplasm;membrane;nucleus	catalytic activity;protein binding	Pf00501, Pf06464	0.974	0.98	0.934	0.94	0.936	0.954	0.887	0.911	1.05	1.052	0.946	0.968	0.948	0.97	0.97	0.986	0.867	0.872	1.092	1.072	0.918	0.943	0.945	0.948	0.979	1.014	1.043	1.033	1.005
Master Protein	Q6NZL0	Protein SOGA3 OS=Mus musculus GN=Soga3 PE=2 SV=2	6330407J23Rik; Soga3	67412	ENSMUSG00000038916	High	FALSE	43	696	38	0	291.241	2522.19	36.8254	12.895	10	metabolic process;regulation of biological process	membrane		Pf04111, Pf10174, Pf10186, Pf11180, Pf11365	1.005	0.998	0.951	0.924	1.016	1.017	0.943	0.918	1.02	1.001	0.988	0.982	0.986	0.987	1.021	1.019	0.942	0.914	1.036	1.015	0.938	0.936	0.956	0.925	0.985	1	1.045	1.025	1.016
Master Protein	O35250	Exocyst complex component 7 OS=Mus musculus GN=Exoc7 PE=1 SV=2	Exoc7	53413	ENSMUSG00000020792	High	FALSE	41	484	41	0	291.071	1895.62	63.7016	31.442	11	cell organization and biogenesis;regulation of biological process;transport	cytoplasm;cytosol;membrane	protein binding	Pf03081	1.025	1.028	0.924	0.927	1.034	1.011	0.916	0.913	1.018	1.011	0.949	0.931	1.025	1.011	1.038	1.048	0.941	0.932	1.029	1.029	0.937	0.916	0.934	0.911	1.014	0.998	1.028	1.024	1.036
Master Protein	H7BX15	Latrophilin-1 OS=Mus musculus GN=Lphn1 PE=4 SV=1	Lphn1; Adgrl1	330814	ENSMUSG00000013033	High	FALSE	37	359	36	0	290.925	1515.68	34.8742	6.529	8	regulation of biological process;response to stimulus;transport	cytosol;membrane	protein binding;receptor activity;signal transducer activity	Pf00002, Pf01825, Pf02140, Pf02191, Pf02354, Pf02793, Pf12003	0.979	1.029	1.048	1.002	1.045	1.013	0.922	0.894	0.987	0.988	1.013	0.963	0.983	1.034	0.971	1.021	0.921	0.916	0.982	1.033	1.032	1.006	0.984	0.962	1.019	1.009	1.033	1.063	1.084
Master Protein	P01012	Ovalbumin OS=Gallus gallus GN=SERPINB14 PE=1 SV=2	OVAL; SERPINB14	396058	ENSGALG00000012869	High	FALSE	20	1981	20	0	290.821	7059.47	65.8031	1622.78	2	regulation of biological process	cytosol;extracellular;organelle lumen;vacuole	enzyme regulator activity;metal ion binding	Pf00079	1	1	1	1	1	1	1	1	1	1	1	1	1	1	1	1	1	1	1	1	1	1	1	1	1	1	1	1	1
Master Protein	Q3U0V1	Far upstream element-binding protein 2 OS=Mus musculus GN=Khsrp PE=1 SV=2	Khsrp	16549	ENSMUSG00000007670	High	FALSE	39	594	34	0	290.575	2358.55	52.2727	42.067	17	metabolic process;regulation of biological process;transport	cytoplasm;cytosol;membrane;nucleus	DNA binding;RNA binding	Pf00013, Pf07650, Pf09005, Pf13014	1.013	1.01	0.949	0.933	0.926	0.971	0.921	0.916	1.021	0.996	1.007	1.004	0.968	0.969	1.011	1.007	0.932	0.917	1.05	1.042	0.969	0.97	0.979	0.981	0.914	0.959	1.022	1.027	0.979
Master Protein	P14152	Malate dehydrogenase, cytoplasmic OS=Mus musculus GN=Mdh1 PE=1 SV=3	Mdh1	17449	ENSMUSG00000020321	High	FALSE	33	3796	33	0	290.46	13983.9	91.3174	1220.68	11	metabolic process;regulation of biological process	cytoplasm;cytosol;mitochondrion	catalytic activity;nucleotide binding	Pf00056, Pf02866	0.959	0.954	0.913	0.897	0.941	0.938	0.941	0.937	1.017	1.021	0.963	0.951	0.908	0.913	0.978	0.973	0.867	0.855	1.001	1.003	0.932	0.924	0.946	0.93	1.02	1.012	1.036	1.037	1.027
Master Protein	B2RXT5	Glucose-6-phosphate isomerase OS=Mus musculus GN=Gpi1 PE=2 SV=1	Gpi1	14751		High	FALSE	26	2175	2	0	289.477	7820.87	60.4651	435.516	7	metabolic process;regulation of biological process	cytoplasm;cytosol;extracellular;membrane	catalytic activity;protein binding	Pf00342	1.191	1.115	1.807	1.692	1.371	1.273	1.22	1.101	0.836	0.826	1.223	1.187	1.5	1.39	0.819	0.813	0.62	0.641	1.23	1.178	0.563	0.57	0.557	0.576	0.576	0.631	0.802	0.835	1.286
Master Protein	Q5FWJ5	Hnrpk protein OS=Mus musculus GN=Hnrnpk PE=2 SV=1	Hnrnpk	15387	ENSMUSG00000021546	High	FALSE	30	1555	1	0	288.886	5667.76	65.9483	157.489	13	cellular homeostasis;defense response;metabolic process;regulation of biological process;response to stimulus	cytoplasm;cytosol;membrane;mitochondrion;nucleus;spliceosomal complex	DNA binding;protein binding;RNA binding	Pf00013, Pf08067, Pf13014, Pf13083		0.23	1.188	1.927	0.465		1.241	1.368		0.276	1.286	1.665		0.182		0.177	1.056	1.224		0.31	1.358	2.06	1.352	2.292	0.459			0.46	0.691
Master Protein	Q3V0Z8	Putative uncharacterized protein (Fragment) OS=Mus musculus GN=Ddx5 PE=2 SV=1	Ddx5	13207		High	FALSE	40	719	30	0	288.802	2533.29	47.2464	105.247	11	metabolic process;regulation of biological process;response to stimulus	membrane;nucleus;spliceosomal complex	catalytic activity;nucleotide binding;protein binding;RNA binding	Pf00270, Pf00271, Pf08061	0.969	0.967	1	1.004	0.928	0.931	0.963	0.958	0.976	0.974	0.997	1.007	0.939	0.949	0.989	0.973	0.99	0.983	0.998	1.004	0.974	0.982	0.983	0.996	0.865	0.879	0.973	0.98	0.932
Master Protein	Q3UIZ0	Putative uncharacterized protein OS=Mus musculus GN=Gak PE=2 SV=1	Gak	231580		High	FALSE	45	463	41	0	288.684	1738.42	39.6169	8.389	5	cell differentiation;cell organization and biogenesis;metabolic process;regulation of biological process;transport	cytoplasm;Golgi;membrane	catalytic activity;nucleotide binding;protein binding	Pf00069, Pf00226, Pf07714, Pf10409	1.035	1.025	0.969	0.954	1.025	1.016	0.941	0.932	1.045	1.032	0.96	0.953	0.986	1.006	1.041	1.029	0.95	0.954	1.029	1.01	0.944	0.95	0.933	0.922	0.989	0.99	1.034	1.038	1.029
Master Protein	P70232-2	Isoform 2 of Neural cell adhesion molecule L1-like protein OS=Mus musculus GN=Chl1	Chl1	12661	ENSMUSG00000030077	High	FALSE	39	432	1	0	288.557	1607.36	47.4783	8.667	6	cell differentiation;cell organization and biogenesis;cellular component movement;development;regulation of biological process;response to stimulus	extracellular;membrane	protein binding	Pf00041, Pf00047, Pf07679, Pf07686, Pf13882, Pf13895, Pf13927	0.505		0.827			0.602	0.879	1.302	0.534		0.84		0.431		0.545		0.96	1.18	0.542		0.799		0.827			0.57	0.514
Master Protein	Q8CJ19	Protein-methionine sulfoxide oxidase MICAL3 OS=Mus musculus GN=Mical3 PE=2 SV=2	Mical3	194401		High	FALSE	61	335	58	0	288.314	1212.31	33.718	2.709	6	cell organization and biogenesis;metabolic process;transport	cytoplasm;cytoskeleton;membrane;nucleus	catalytic activity;metal ion binding;nucleotide binding;protein binding	Pf00307, Pf00412, Pf00890, Pf01262, Pf01266, Pf01494, Pf01946, Pf03486, Pf07992, Pf11971, Pf12130, Pf13450	1.005	1.001	0.942	0.922	0.989	1.004	0.913	0.918	1.025	1.011	0.952	0.966	0.97	1.003	0.964	0.977	0.932	0.906	1.12	1.075	0.952	0.953	0.946	0.95	1	1.025	1.062	1.043	1.026
Master Protein	Q5SS83	Flotillin 2, isoform CRA_a OS=Mus musculus GN=Flot2 PE=4 SV=1	Flot2	14252	ENSMUSG00000061981	High	FALSE	29	661	1	0	288.295	2698.07	67.2897	74.646	11	cell organization and biogenesis;regulation of biological process	cytoskeleton;endosome;membrane	protein binding	Pf01145			0.796	1.134	0.899		1.165	0.933			0.849	0.987					1.051	0.892			0.823	1.111	0.893	1.063	0.955				0.965
Master Protein	Q3TPZ5	Dynactin 2 OS=Mus musculus GN=Dctn2 PE=2 SV=1	Dctn2	69654	ENSMUSG00000025410	High	FALSE	28	1012	28	0	287.991	4386.1	74.6269	180.66	10	cell organization and biogenesis;cell proliferation;metabolic process;transport	chromosome;cytoplasm;cytoskeleton;membrane	catalytic activity;motor activity;protein binding	Pf04912	0.993	1.001	0.946	0.928	1.01	1.001	0.907	0.937	1.031	1.024	0.972	0.966	0.974	0.986	0.991	0.992	0.877	0.879	1.045	1.047	0.952	0.948	0.962	0.948	0.993	0.986	1.031	1.026	1.018
Master Protein	E9QM99	Dedicator of cytokinesis protein 10 OS=Mus musculus GN=Dock10 PE=1 SV=1	Dock10	210293	ENSMUSG00000038608	High	FALSE	54	298	53	0	287.644	1069.32	28.6694	2.644	1	regulation of biological process;response to stimulus	membrane	protein binding	Pf00169, Pf06920, Pf11878, Pf14429	0.961	0.929	0.892	0.864	0.976	0.955	0.918	0.931	0.926	0.904	0.972	0.973	0.965	0.931	0.991	0.966	0.965	0.987	0.898	0.865	0.89	0.898	0.954	0.972	0.985	0.974	0.969	0.959	0.994
Master Protein	Q9DB05	Alpha-soluble NSF attachment protein OS=Mus musculus GN=Napa PE=1 SV=1	Napa	108124	ENSMUSG00000006024	High	FALSE	24	886	20	0	287.625	3626.54	76.9492	718.686	7	cell communication;cell differentiation;cell organization and biogenesis;regulation of biological process;transport	membrane	protein binding	Pf14938	0.915	0.932	0.984	1.001	0.888	0.862	0.947	0.969	0.947	0.941	1.018	1.033	0.918	0.932	0.926	0.935	0.965	0.978	0.941	0.941	1.001	1.015	1.012	1.034	0.888	0.868	0.965	0.961	0.958
Master Protein	Q9EQZ6-3	Isoform 3 of Rap guanine nucleotide exchange factor 4 OS=Mus musculus GN=Rapgef4	Rapgef4	56508	ENSMUSG00000049044	High	FALSE	44	491	42	0	287.558	1794.93	55.287	11.368	2	regulation of biological process;response to stimulus;transport	cytoplasm;cytosol;membrane	nucleotide binding;protein binding	Pf00027, Pf00610, Pf00617, Pf00618, Pf00788	1.038	1.048	0.949	0.955	1.01	1.006	0.923	0.935	1.042	1.037	0.927	0.941	1.003	1.019	1.034	1.054	0.953	0.984	1.017	1.027	0.906	0.938	0.9	0.914	1.006	1.015	1.044	1.047	1.024
Master Protein	Q9EQF6	Dihydropyrimidinase-related protein 5 OS=Mus musculus GN=Dpysl5 PE=1 SV=1	Dpysl5	65254	ENSMUSG00000029168	High	FALSE	30	693	30	0	287.542	2658.69	67.5532	86.333	5	cell differentiation;cellular component movement;metabolic process	cytoplasm	catalytic activity;protein binding	Pf01979, Pf13147, Pf13594	0.995	1.016	0.968	0.951	0.925	0.925	1.061	1.06	1.17	1.169	1.1	1.085	0.953	0.993	1.055	1.066	0.927	0.913	1.156	1.161	1.108	1.09	1.045	1.032	1.02	1.039	1.025	1.033	0.962
Master Protein	P27612	Phospholipase A-2-activating protein OS=Mus musculus GN=Plaa PE=1 SV=4	Plaa	18786	ENSMUSG00000028577	High	FALSE	36	433	36	0	287.425	1670.46	55.1637	16.378	4	defense response;regulation of biological process;response to stimulus		enzyme regulator activity;protein binding	Pf00400, Pf08324, Pf09070	0.976	0.939	0.91	0.914	0.985	0.966	0.929	0.988	0.985	0.959	0.983	1.012	0.968	0.926	0.979	0.946	0.884	0.926	0.977	0.953	0.968	0.989	0.927	0.965	0.984	0.956	1	0.977	1.018
Master Protein	Q9JMA1	Ubiquitin carboxyl-terminal hydrolase 14 OS=Mus musculus GN=Usp14 PE=1 SV=3	Usp14	59025	ENSMUSG00000047879	High	FALSE	31	408	31	0	287.395	1654.78	60.4462	123.961	18	cell communication;metabolic process;regulation of biological process	cell surface;cytoplasm;membrane;proteasome	catalytic activity;enzyme regulator activity;protein binding	Pf00443, Pf13423	0.948	0.944	0.982	0.971	0.985	0.97	0.996	1.002	0.973	0.989	0.998	0.997	0.936	0.918	0.96	0.935	0.961	0.945	1.004	1.014	0.991	0.981	1.015	1.005	0.994	0.978	1.005	1.014	1.001
Master Protein	Q6PGN3-3	Isoform 3 of Serine/threonine-protein kinase DCLK2 OS=Mus musculus GN=Dclk2	Dclk2	70762		High	FALSE	37	479	34	0	287.051	1956.99	57.7173	17.906	3	cell organization and biogenesis;metabolic process;regulation of biological process;response to stimulus	cytoplasm;cytoskeleton	catalytic activity;nucleotide binding	Pf00069, Pf03607, Pf07714, Pf14531	1.028	1.036	1.013	0.979	1.017	1.015	0.931	0.958	1.006	1.005	0.982	0.943	1.025	1.033	1.042	1.034	0.942	0.96	0.972	0.967	0.997	0.967	0.978	0.944	0.976	0.977	1.021	1.011	0.999
Master Protein	Q3TF87	Putative uncharacterized protein OS=Mus musculus GN=Dars PE=2 SV=1	Dars	226414		High	FALSE	37	693	37	0	286.96	2620.53	73.4531	61.355	1	metabolic process	cytoplasm;membrane	catalytic activity;nucleotide binding;RNA binding	Pf00152, Pf01336	0.969	0.923	0.923	0.92	0.951	0.953	0.931	0.933	0.994	0.937	0.956	0.957	0.953	0.898	0.984	0.928	0.891	0.883	0.985	0.934	0.952	0.95	0.929	0.922	0.92	0.948	1.003	0.954	0.958
Master Protein	Q62417	Sorbin and SH3 domain-containing protein 1 OS=Mus musculus GN=Sorbs1 PE=1 SV=2	Sorbs1	20411		High	FALSE	42	540	16	0	286.941	2067.08	35.2713	5.105	19	cell organization and biogenesis;regulation of biological process;response to stimulus;transport	cytoplasm;cytoskeleton;cytosol;membrane;nucleus	protein binding	Pf00018, Pf02208, Pf07653, Pf14604	0.987	0.996	0.874	0.876	0.915	0.931	0.899	0.916	1.031	1.005	0.949	0.948	0.962	0.966	0.97	0.965	0.845	0.847	1	0.984	0.926	0.925	0.911	0.916	0.981	0.999	1.058	1.029	0.998
Master Protein	Q99LC3	NADH dehydrogenase [ubiquinone] 1 alpha subcomplex subunit 10, mitochondrial OS=Mus musculus GN=Ndufa10 PE=1 SV=1	Ndufa10	67273	ENSMUSG00000026260	High	FALSE	29	846	29	0	286.695	3404.47	79.4366	463.159	1	metabolic process;response to stimulus;transport	mitochondrion;organelle lumen	catalytic activity	Pf01712, Pf02223	0.903	0.918	0.976	0.944	0.969	0.975	1.066	1.017	0.965	0.965	1.055	1.03	0.878	0.882	0.914	0.927	1.009	0.953	0.951	0.959	0.999	0.981	1.005	0.983	1.057	1.058	1.005	1.023	1.056
Master Protein	Q9EPU0	Regulator of nonsense transcripts 1 OS=Mus musculus GN=Upf1 PE=1 SV=2	Upf1	19704	ENSMUSG00000058301	High	FALSE	44	396	44	0	286.242	1525.03	44.0391	11.041	8	cell organization and biogenesis;cellular homeostasis;metabolic process;regulation of biological process;response to stimulus	chromosome;cytoplasm;nucleus;spliceosomal complex	catalytic activity;DNA binding;metal ion binding;nucleotide binding;RNA binding	Pf04851, Pf09416, Pf13086, Pf13087, Pf13245, Pf13604	1.011	0.997	0.94	0.948	0.948	1.051	0.967	0.963	1.024	1.006	0.967	0.961	0.983	0.986	0.991	0.992	0.929	0.925	1.05	1.026	0.957	0.965	0.944	0.947	0.954	0.979	1.049	1.035	1.015
Master Protein	Q6ZQ18	Protein EFR3 homolog B OS=Mus musculus GN=Efr3b PE=2 SV=2	Efr3b	668212	ENSMUSG00000020658	High	FALSE	37	372	35	0	285.97	1473.33	52.754	20.899	12	metabolic process	cytoplasm;cytosol;membrane			1.009	0.979	0.958	0.944	0.978	0.966	0.94	0.931	1.012	0.991	0.975	0.95	1.002	0.997	1.014	0.973	0.919	0.923	0.972	0.931	0.973	0.95	0.947	0.927	0.995	0.971	1.016	0.993	1.031
Master Protein	Q3TQX5	Putative uncharacterized protein OS=Mus musculus GN=Ddx3x PE=2 SV=1	Ddx3x	13205	ENSMUSG00000000787	High	FALSE	39	672	38	0	285.955	2513.98	59.8187	42.94	X	cell death;cell organization and biogenesis;defense response;metabolic process;regulation of biological process;response to stimulus	cytoplasm;membrane;mitochondrion;nucleus	catalytic activity;DNA binding;nucleotide binding;protein binding;RNA binding	Pf00270, Pf00271, Pf04851	1.001	0.995	1.005	0.947	0.975	0.939	0.93	0.967	1.038	1.027	0.995	0.998	1.001	0.999	0.99	0.982	0.913	0.911	1.016	1.006	0.99	0.987	0.968	0.973	0.967	0.938	1.018	1.006	0.989
Master Protein	Q68FL4	Putative adenosylhomocysteinase 3 OS=Mus musculus GN=Ahcyl2 PE=1 SV=1	Ahcyl2	74340	ENSMUSG00000029772	High	FALSE	30	1065	1	0	285.818	3815.11	47.3083	76.426	6	metabolic process;transport	cytoplasm;cytosol;endoplasmic reticulum	catalytic activity;nucleotide binding	Pf00670, Pf01262, Pf02254, Pf02826, Pf05221	0.858	0.788	0.968	0.946	0.913	0.889	1.002	1.028	0.859	0.816	1.06	1.046	0.79	0.767	0.822	0.769	0.936	0.952	0.855	0.804	1.051	1.037	1.059	1.044	0.912	0.925	0.887	0.84	0.945
Master Protein	Q91YQ5	Dolichyl-diphosphooligosaccharide--protein glycosyltransferase subunit 1 OS=Mus musculus GN=Rpn1 PE=1 SV=1	Rpn1	103963	ENSMUSG00000030062	High	FALSE	40	650	40	0	285.705	2445.82	70.3947	49.97	6	metabolic process	endoplasmic reticulum;membrane	catalytic activity;RNA binding	Pf04597	0.955	0.98	0.924	0.916	0.944	0.948	0.951	0.939	1.004	1.031	0.986	0.986	0.936	0.968	0.977	0.972	0.908	0.883	0.991	1.019	0.98	0.972	0.94	0.943	0.96	0.973	0.993	1.008	0.977
Master Protein	Q8C2E7	WASH complex subunit strumpellin OS=Mus musculus GN=Kiaa0196 PE=2 SV=2	E430025E21Rik	223593	ENSMUSG00000022350	High	FALSE	50	319	50	0	285.608	1282.17	47.6273	6.667	15	cell organization and biogenesis;transport	cytoplasm;cytosol;endoplasmic reticulum;endosome		Pf10266	0.984	0.991	0.892	0.901	0.938	0.96	0.866	0.897	0.988	0.995	0.93	0.926	0.986	0.987	0.983	0.995	0.83	0.855	0.982	0.977	0.908	0.914	0.91	0.901	0.922	0.973	0.988	0.978	0.931
[truncated: 9,051 more rows]
[truncated: 123 more columns]
