# Supplementary material for: Molecular and functional signatures in a novel Alzheimer’s disease mouse model assessed by quantitative proteomics
Source: Mol Neurodegener. 2018 Jan 16;13:2. doi: 10.1186/s13024-017-0234-4 (PMC5771139; doi:10.1186/s13024-017-0234-4)
Supplement: Supplementary file 7 — Canonical pathways enriched by IPA analysis. (XLSX 18 kb) [file 13024_2017_234_MOESM7_ESM.xlsx]

## Sheet: IPA_comparison_final_grouped
Category	Canonical Pathway	4Mon APP/PS1	7Mon APP/PS1	10Mon APP/PS1	4Mon Tau	7Mon Tau	10Mon Tau	4Mon APT	7Mon APT	10Mon APT	-log(P value)
Nervous system signaling	Neuregulin Signaling	-0.447214	-0.447214	-0.447214	-0.447214	-1.34164	2.23607	-0.447214	-0.447214	1.34164	1.5904
	Amyloid Processing	1.34164	1.34164	1.34164	-0.447214	-0.447214	2.23607	2.23607	2.23607	2.23607	4.70594
	GNRH Signaling	1.29099	-2.32379	-1.29099	-0.774597	-3.35659	0.774597	1.29099	-2.32379	-1.80739	2.29423
	CREB Signaling in Neurons	-0.229416	-2.06474	-0.229416	-1.14708	-3.90007	1.14708	1.14708	-2.06474	-1.60591	4.82237
	Synaptic Long Term Potentiation	0.229416	-1.14708	0.229416	-1.60591	-3.44124	1.14708	0.688247	-1.14708	-0.688247	4.90519
	Synaptic Long Term Depression	0	-0.942809	0.471405	-1.41421	-3.77124	0.471405	0.471405	-0.942809	0	2.90843
	Ephrin Receptor Signaling	0.942809	-0.942809	-0.471405	-0.942809	-1.88562	-0.471405	0.942809	-0.942809	0	3.89244
	Ephrin B Signaling	0.333333	-0.333333	-1	-1	-1	0.333333	0.333333	-1	-1	5.59879
	Regulation of Actin-based Motility by Rho	1.73205	0.57735	0	-0.57735	-0.57735	0	1.73205	0.57735	0	3.00875
	Melatonin Signaling	1.26491	0	0.632456	-0.632456	-2.52982	-0.632456	1.89737	0	-0.632456	2.27532
	Agrin Interactions at Neuromuscular Junction	1.34164	-0.447214	-1.34164	-0.447214	-0.447214	-2.23607	1.34164	-0.447214	-1.34164	2.36975
	Dopamine-DARPP32 Feedback in cAMP Signaling	0.774597	0.258199	0.774597	0.258199	-2.32379	-0.258199	1.80739	0.258199	-0.774597	1.40829
	CDK5 Signaling	0	-1.89737	-1.26491	0	-1.89737	1.26491	0.632456	-0.632456	-0.632456	2.04853
	Neuropathic Pain Signaling In Dorsal Horn Neurons	1	-1.5	1	-1.5	-3.5	0.5	2	-1	-1.5	3.17351
Immune response signaling	Leukocyte Extravasation Signaling	2.44949	2.85774	2.85774	0	-0.408248	2.04124	2.04124	2.85774	2.85774	4.7674
	Antioxidant Action of Vitamin C	-2.52982	-1.26491	-3.16228	1.26491	2.52982	0	-3.16228	-1.26491	-1.89737	2.84754
	B Cell Receptor Signaling	-1.29099	-0.774597	-0.774597	0.258199	-0.774597	-0.258199	-0.258199	-0.774597	-0.774597	1.57384
	Coagulation System	0	-0.816497	0.816497	0	-2.44949	0.816497	-0.816497	0.816497	0.816497	1.85825
	Complement System	1.34164	2.23607	2.23607	0.447214	-0.447214	2.23607	1.34164	2.23607	2.23607	2.63016
	PI3K Signaling in B Lymphocytes	0.688247	0.688247	1.60591	-1.14708	-2.9824	1.14708	1.60591	0.688247	0.688247	4.47554
	CXCR4 Signaling	1.94145	-0.27735	0.27735	-0.27735	-2.49615	-0.27735	1.38675	-0.27735	0.27735	2.60327
	TREM1 Signaling	3	2.33333	3	-0.333333	-2.33333	2.33333	3	2.33333	3	1.76938
	Fc Gamma Receptor-mediated Phagocytosis in Macrophages	2.32379	2.32379	1.80739	0.774597	-0.258199	0.258199	2.84019	2.32379	1.29099	3.74631
	fMLP Signaling in Neutrophils	0.301511	0.301511	0.904534	1.50756	-2.11058	0.904534	0.904534	0.301511	0.301511	2.10367
	Role of NFAT in Regulation of the Immune Response	0.27735	-0.27735	0.83205	0.27735	-3.05085	0.27735	0.83205	-0.27735	0.27735	2.25998
	IL-8 Signaling	1.41421	1.88562	1.88562	-0.471405	-1.88562	0.471405	1.88562	1.88562	1.88562	2.85117
	NRF2-mediated Oxidative Stress Response	2.3094	0.57735	1.1547	-0.57735	-0.57735	1.73205	2.3094	1.1547	1.73205	2.69951
Cell cycle / Apoptosis related signaling	Integrin Signaling	2.41404	2.04265	1.29987	0.185695	-1.67126	1.67126	2.78543	2.04265	2.04265	5.83796
	Wnt/Ca+ pathway	1.88982	1.13389	1.88982	-1.13389	-2.64575	-0.377964	2.64575	1.13389	0.377964	1.35415
	Sperm Motility	2.49615	0.27735	1.94145	-0.27735	-3.05085	0.27735	3.05085	0.27735	-0.27735	1.76749
	Apoptosis Signaling	1.89737	1.26491	1.26491	-0.632456	0.632456	1.26491	1.26491	1.26491	0.632456	1.52915
	Aryl Hydrocarbon Receptor Signaling	-2.23607	-0.447214	-2.23607	1.34164	0.447214	-0.447214	-2.23607	-0.447214	-1.34164	2.01793
	Actin Cytoskeleton Signaling	2.35339	1.1767	0.784465	-0.392232	-1.1767	0.392232	1.96116	1.56893	1.1767	4.61627
	Remodeling of Epithelial Adherens Junctions	1.88982	1.13389	1.13389	-1.13389	-0.377964	1.13389	1.13389	1.13389	1.13389	4.8908
	Regulation of Cellular Mechanics by Calpain Protease	0.816497	0.816497	0.816497	0	-0.816497	2.44949	0.816497	0.816497	1.63299	2.40963
	Chemokine Signaling	0.333333	-1	0.333333	-0.333333	-2.33333	1.66667	0.333333	-1	-1	1.88832
Disease / Cancer related signaling	IL-1 Signaling	0	-1.41421	-1.41421	0.707107	-2.12132	-1.41421	0	-1.41421	-1.41421	2.30993
	LPS/IL-1 Mediated Inhibition of RXR Function	-2.82843	-2.82843	-2.82843	-1.41421	1.41421	-0.707107	-2.12132	-2.82843	-2.82843	3.24826
	LXR/RXR Activation	-1.21268	1.69775	2.18282	2.66789	-0.242536	2.66789	-1.21268	2.18282	2.18282	5.9786
	PPAR/RXR Alpha Activation	-0.534522	1.60357	0	0.534522	1.06904	0.534522	-0.534522	2.13809	1.60357	4.41746
	Acute Phase Response Signaling	-1.50756	0.301511	1.50756	0.904534	-2.7136	2.11058	-1.50756	1.50756	2.11058	1.72317
	Role of NFAT in Cardiac Hypertrophy	1.29099	-0.774597	0.774597	0.258199	-3.35659	1.29099	1.29099	-0.774597	-0.774597	1.64553
	Cardiac Hypertrophy Signaling	1	-1	0	-1	-3.5	0.5	1.5	-1	-1	1.90777
	Estrogen-Dependent Breast Cancer Signaling	-0.447214	-1.34164	-0.447214	-0.447214	-2.23607	0.447214	0.447214	-1.34164	0.447214	1.52249
Intracellular signaling	Signaling by Rho Family GTPases	2.78543	0.928477	0.557086	-1.29987	-1.67126	-0.185695	3.15682	0.928477	-0.185695	6.90397
	RhoA Signaling	1.52753	-0.218218	-0.218218	-1.52753	-1.09109	0.218218	1.96396	0.218218	-1.09109	6.72693
	RhoGDI Signaling	-2.06474	-1.14708	-0.229416	-0.229416	0.229416	-0.229416	-1.60591	-1.14708	-0.229416	5.46849
	G Alpha-i Signaling	-1.88982	-0.377964	-0.377964	-1.13389	0.377964	-0.377964	-1.13389	-0.377964	-0.377964	2.49918
	G Alpha-q Signaling	1.06904	1.06904	2.13809	0	-2.13809	0.534522	1.60357	1.06904	1.06904	2.04375
	G Beta Gamma Signaling	0.258199	-1.80739	-1.80739	-0.774597	-3.35659	-1.29099	0.258199	-1.29099	-1.29099	3.97557
	G Alpha-s Signaling	0	-0.707107	-1.41421	0.707107	-1.41421	-0.707107	0	-1.41421	-1.41421	1.38244
	Alpha-Adrenergic Signaling	-1.41421	0	0.707107	0.707107	-1.41421	2.82843	-0.707107	0	0.707107	2.51851
	Actin Nucleation by ARP-WASP Complex	0.632456	0.632456	0	-1.26491	-0.632456	0.632456	0	0.632456	0.632456	3.17914
	Aldosterone Signaling in Epithelial Cells	2.12132	0.707107	1.41421	-0.707107	-2.82843	1.41421	2.12132	0.707107	0	2.2471
	Thrombin Signaling	2.35702	1.41421	2.35702	-0.942809	-2.82843	0.471405	2.35702	1.41421	0.942809	3.3115
	Tec Kinase Signaling	2.7136	1.50756	1.50756	-0.301511	-1.50756	-0.301511	2.7136	1.50756	1.50756	2.19231
	Phospholipase C Signaling	1.06904	1.60357	1.60357	0.534522	-2.13809	0.534522	1.60357	1.60357	1.60357	2.38056
	Androgen Signaling	0.447214	-1.34164	-0.447214	1.34164	-1.34164	-1.34164	1.34164	-1.34164	-1.34164	2.48361
	Protein Kinase A Signaling	0.928477	0.185695	0.185695	0.928477	-1.29987	0.557086	1.29987	-0.185695	-1.29987	3.70368
	Calcium Signaling	0.301511	-1.50756	-0.301511	-0.904534	-2.11058	0.301511	0.904534	-1.50756	-1.50756	1.50166
	P2Y Purigenic Receptor Signaling Pathway	0.83205	-0.83205	-0.27735	-0.27735	-3.60555	-0.27735	1.38675	-0.83205	-0.83205	2.48608
