# Supplementary material for: Molecular and functional signatures in a novel Alzheimer’s disease mouse model assessed by quantitative proteomics
Source: Mol Neurodegener. 2018 Jan 16;13:2. doi: 10.1186/s13024-017-0234-4 (PMC5771139; doi:10.1186/s13024-017-0234-4)
Supplement: Supplementary file 9 — GO analysis results in ADLPAPT mice. (XLSX 41 kb) [file 13024_2017_234_MOESM9_ESM.xlsx]

## Sheet: APT_DOWN (Cluster 2)
Category	Term	Count	%	PValue	Genes	Fold Enrichment	Bonferroni	Benjamini	FDR
GOTERM_BP_FAT	GO:0007269~neurotransmitter secretion	6	4.31655	5.02e-06	Q8BG39, O88935, P47708, P63011, Q8R1B5, Q14BI2	23.3471	0.00319987	0.00319987	0.00748139
	GO:0006836~neurotransmitter transport	7	5.03597	2.09e-05	Q8BG39, O88935, P47708, P63011, P31650, Q8R1B5, Q14BI2	12.2572	0.0132766	0.0066605	0.0311954
	GO:0001505~regulation of neurotransmitter levels	6	4.31655	7.46e-05	Q8BG39, O88935, P47708, P63011, Q8R1B5, Q14BI2	13.5564	0.0464786	0.0157393	0.111039
	GO:0016192~vesicle-mediated transport	13	9.35252	0.000105	Q921Q7, Q8BG39, Q3TJ95, Q5SWR1, Q9DCR2, P47708, Q61411, Q543Y7, Q8BMI3, Q9D0I4, Q5DQR4, P63011, Q8R1B5	3.90788	0.0648668	0.0166268	0.156436
	GO:0031644~regulation of neurological system process	7	5.03597	0.000146	P97772, P97300, Q61411, Q9JIA1, P63011, Q8R1B5, Q14BI2	8.67768	0.0890098	0.0184719	0.217381
	GO:0016079~synaptic vesicle exocytosis	4	2.8777	0.000216	Q8BG39, P47708, P63011, Q8R1B5	32.9606	0.128904	0.022738	0.321633
	GO:0003001~generation of a signal involved in cell-cell signaling	6	4.31655	0.000315	Q8BG39, O88935, P47708, P63011, Q8R1B5, Q14BI2	10.0059	0.182044	0.0282986	0.467988
	GO:0050804~regulation of synaptic transmission	6	4.31655	0.000703	P97300, Q61411, Q9JIA1, P63011, Q8R1B5, Q14BI2	8.40495	0.361428	0.0545225	1.04156
	GO:0051969~regulation of transmission of nerve impulse	6	4.31655	0.000955	P97300, Q61411, Q9JIA1, P63011, Q8R1B5, Q14BI2	7.85509	0.456279	0.0654612	1.41231
	GO:0048489~synaptic vesicle transport	4	2.8777	0.00109297	Q8BG39, P47708, P63011, Q8R1B5	19.3217	0.502268	0.0673911	1.61549
	GO:0032940~secretion by cell	7	5.03597	0.00203078	Q8BG39, O88935, P47708, Q5DQR4, P63011, Q8R1B5, Q14BI2	5.27192	0.726637	0.11122	2.98221
	GO:0008104~protein localization	14	10.0719	0.00239199	P29595, Q8BG39, Q3TJ95, Q9WV98, Q5SWR1, Q9DCR2, P47708, Q9Z0P4, Q6ZQ33, Q8BMI3, Q9D0I4, Q5DQR4, P63011, P46460	2.60446	0.783013	0.119554	3.50388
	GO:0044057~regulation of system process	7	5.03597	0.00299097	P97772, P97300, Q61411, Q9JIA1, P63011, Q8R1B5, Q14BI2	4.87849	0.852082	0.136713	4.36318
	GO:0046903~secretion	7	5.03597	0.00475591	Q8BG39, O88935, P47708, Q5DQR4, P63011, Q8R1B5, Q14BI2	4.437	0.952237	0.195272	6.85384
	GO:0019226~transmission of nerve impulse	7	5.03597	0.00529691	Q8BG39, O88935, P47708, P04370, P63011, Q8R1B5, Q14BI2	4.33884	0.966238	0.202197	7.6051
	GO:0015031~protein transport	12	8.63309	0.00611175	Q8BG39, Q3TJ95, Q9WV98, Q5SWR1, Q9DCR2, P47708, Q6ZQ33, Q9D0I4, Q8BMI3, Q5DQR4, P63011, P46460	2.58217	0.979985	0.216868	8.72594
	GO:0045184~establishment of protein localization	12	8.63309	0.00646264	Q8BG39, Q3TJ95, Q9WV98, Q5SWR1, Q9DCR2, P47708, Q6ZQ33, Q9D0I4, Q8BMI3, Q5DQR4, P63011, P46460	2.56248	0.984022	0.215984	9.20469
	GO:0006887~exocytosis	5	3.59712	0.00763525	Q8BG39, P47708, Q5DQR4, P63011, Q8R1B5	6.36739	0.992478	0.237891	10.7876
	GO:0007268~synaptic transmission	6	4.31655	0.00854341	Q8BG39, O88935, P47708, P63011, Q8R1B5, Q14BI2	4.72188	0.995806	0.250322	11.9959
GOTERM_MF_FAT	GO:0008092~cytoskeletal protein binding	13	9.35252	5.14e-05	Q6PER3, P43407, Q3U1N0, O88935, P47708, Q9WV92, Q61553, Q6ZQ33, Q9QYB8, Q641P0, Q543Y7, Q543N3, Q7TSJ2	4.21471	0.0119632	0.0119632	0.066099
	GO:0005516~calmodulin binding	6	4.31655	0.00153308	Q8R071, P06837, Q01065, Q9QYB8, Q8C078, Q7TSJ2	7.06433	0.301637	0.164319	1.95307
	GO:0005096~GTPase activator activity	7	5.03597	0.00294882	Q921Q7, Q9Z2H2, Q9Z268, Q91VZ6, P01831, Q5SSM3, A2ALS5	4.89352	0.498947	0.205743	3.72535
	GO:0005525~GTP binding	9	6.47482	0.00460016	O70443, P28661, Q61411, Q91Z61, Q9Z2Q6, Q5PR73, P63011, P61226, Q9R1T4	3.41243	0.660038	0.236414	5.75521
	GO:0030695~GTPase regulator activity	9	6.47482	0.00516755	Q921Q7, Q9Z2H2, P47708, Q9Z268, Q91VZ6, P01831, Q8BPN8, Q5SSM3, A2ALS5	3.34626	0.7025	0.215311	6.44351
	GO:0019001~guanyl nucleotide binding	9	6.47482	0.00533914	O70443, P28661, Q61411, Q91Z61, Q9Z2Q6, Q5PR73, P63011, P61226, Q9R1T4	3.32782	0.714269	0.18843	6.65074
	GO:0032561~guanyl ribonucleotide binding	9	6.47482	0.00533914	O70443, P28661, Q61411, Q91Z61, Q9Z2Q6, Q5PR73, P63011, P61226, Q9R1T4	3.32782	0.714269	0.18843	6.65074
	GO:0003779~actin binding	8	5.7554	0.00539144	Q3U1N0, O88935, P47708, Q9WV92, Q61553, Q9QYB8, Q641P0, Q543N3	3.7284	0.717764	0.165327	6.71383
	GO:0051015~actin filament binding	4	2.8777	0.00560641	Q3U1N0, P47708, Q61553, Q543N3	10.9569	0.731684	0.151639	6.9727
	GO:0060589~nucleoside-triphosphatase regulator activity	9	6.47482	0.00569539	Q921Q7, Q9Z2H2, P47708, Q9Z268, Q91VZ6, P01831, Q8BPN8, Q5SSM3, A2ALS5	3.29155	0.737244	0.138003	7.07965
	GO:0031267~small GTPase binding	4	2.8777	0.00938252	B1GX81, P47708, Q8BMI3, Q8BPN8	9.09981	0.889846	0.197953	11.4133
GOTERM_CC_FAT	GO:0009898~internal side of plasma membrane	13	9.35252	1.06e-06	Q3TJ95, P06837, Q5SWR1, Q9DCR2, Q61411, Q9QYB8, P04370, Q91Z61, Q91VZ6, Q5PR73, P63011, P61226, Q9JMF3	6.15634	0.000188	0.000188	0.00130805
	GO:0005886~plasma membrane	43	30.9353	1.23e-06	O70443, P97300, P97772, P06837, Q9Z2H2, Q9WV92, P47708, P04370, Q61411, Q5DQR4, P63011, P31650, Q8R1B5, P54754, Q3U1N0, Q5SWR1, Q9JIA1, P01831, Q91XV3, Q5PR73, Q91VZ6, P61226, Q9JMF3, Q64444, Q3TJ95, Q9DCR2, Q9Z0P4, Q543N3, Q91Z61, Q80UG2, O08842, Q8BLK3, Q8BG39, Q9D658, O88935, Q9QYB8, Q8BIZ1, Q67BT3, Q9Z2Q6, Q8BPN8, P16390, Q6NS52, Q14BI2	2.0111	0.000218	0.000109	0.001511
	GO:0045202~synapse	13	9.35252	3.21e-06	P97772, Q8BG39, P97300, P06837, O88935, P47708, Q8BIZ1, Q9JIA1, Q9Z2Q6, Q8BPN8, P63011, Q8R1B5, Q14BI2	5.53878	0.000568	0.000189	0.00394112
	GO:0044459~plasma membrane part	29	20.8633	7.85e-06	O70443, P06837, Q9Z2H2, P47708, Q9WV92, Q61411, P04370, P31650, P63011, Q8R1B5, P54754, Q3U1N0, Q5SWR1, Q9JIA1, P01831, Q91VZ6, Q5PR73, P61226, Q9JMF3, Q3TJ95, Q9DCR2, Q543N3, Q91Z61, Q8BG39, O88935, Q9QYB8, Q8BIZ1, Q8BPN8, P16390	2.41364	0.0013881	0.000347	0.00963897
	GO:0044456~synapse part	10	7.19424	2.3e-05	P97772, Q8BG39, P97300, O88935, P47708, Q8BIZ1, Q9Z2Q6, Q8BPN8, P63011, Q14BI2	6.41099	0.00406147	0.000814	0.028238
	GO:0030135~coated vesicle	8	5.7554	3.23e-05	Q8BG39, Q3TJ95, O88935, P47708, Q543Y7, Q9Z2Q6, Q8BPN8, P63011	8.76858	0.00570324	0.000953	0.039683
	GO:0030136~clathrin-coated vesicle	7	5.03597	0.000108	Q8BG39, Q3TJ95, O88935, P47708, Q9Z2Q6, Q8BPN8, P63011	9.14799	0.0188896	0.00272062	0.132251
	GO:0031225~anchored to membrane	9	6.47482	0.000129	O70443, Q64444, Q9Z0P4, Q61411, Q91XV3, P01831, Q8BLK3, O08842, Q8R1B5	5.90926	0.0225912	0.00285221	0.158444
	GO:0008021~synaptic vesicle	6	4.31655	0.000133	Q8BG39, O88935, P47708, Q9Z2Q6, Q8BPN8, P63011	11.9923	0.0232216	0.0026072	0.162914
	GO:0043005~neuron projection	8	5.7554	0.00203635	P97772, P06837, Q9EQF6, P04370, Q8BIZ1, Q91XV3, P01831, Q14BI2	4.43798	0.302882	0.035437	2.47269
	GO:0019898~extrinsic to membrane	11	7.91367	0.00222189	O70443, Q9JM96, Q9Z2H2, Q9WV92, Q69ZP3, Q6ZQ33, Q8BMI3, Q5DQR4, Q8BPN8, Q8R4S0, Q9JMF3	3.16746	0.325451	0.035159	2.69517
	GO:0005856~cytoskeleton	18	12.9496	0.00273897	Q921Q7, P97772, Q9JM96, Q9WV92, P47708, P28661, Q543N3, B2RRE3, Q80U49, Q9D1E6, Q6PER3, Q3U1N0, Q641P0, Q9QYB8, Q8BIZ1, Q9Z2Q6, Q7TSJ2, Q9R1T4	2.18042	0.384587	0.0396478	3.31275
	GO:0016023~cytoplasmic membrane-bounded vesicle	10	7.19424	0.00312281	Q3U1N0, Q8BG39, Q3TJ95, O88935, P47708, Q543Y7, Q80Y52, Q9Z2Q6, Q8BPN8, P63011	3.28292	0.425125	0.0416908	3.76886
	GO:0031988~membrane-bounded vesicle	10	7.19424	0.00343496	Q3U1N0, Q8BG39, Q3TJ95, O88935, P47708, Q543Y7, Q80Y52, Q9Z2Q6, Q8BPN8, P63011	3.23602	0.456124	0.0425698	4.13832
	GO:0031410~cytoplasmic vesicle	11	7.91367	0.00376802	Q3U1N0, Q8BG39, Q3TJ95, O88935, Q9DCR2, P47708, Q543Y7, Q80Y52, Q9Z2Q6, Q8BPN8, P63011	2.943	0.487369	0.043569	4.5311
	GO:0031982~vesicle	11	7.91367	0.00438155	Q3U1N0, Q8BG39, Q3TJ95, O88935, Q9DCR2, P47708, Q543Y7, Q80Y52, Q9Z2Q6, Q8BPN8, P63011	2.88062	0.540326	0.0474164	5.25076
	GO:0032156~septin cytoskeleton	3	2.15827	0.00450343	P28661, Q9Z2Q6, Q9R1T4	29.1242	0.55018	0.0459074	5.39313
	GO:0031105~septin complex	3	2.15827	0.00450343	P28661, Q9Z2Q6, Q9R1T4	29.1242	0.55018	0.0459074	5.39313
	GO:0030054~cell junction	10	7.19424	0.00709963	Q8BG39, P06837, O88935, P47708, Q9WV92, Q543N3, Q8BIZ1, Q9JIA1, Q8BPN8, Q8R1B5	2.89177	0.716663	0.0676641	8.3795
	GO:0048475~coated membrane	4	2.8777	0.00862089	Q3TJ95, Q5SWR1, Q9DCR2, Q8BMI3	9.37331	0.784008	0.0774914	10.0889
	GO:0030117~membrane coat	4	2.8777	0.00862089	Q3TJ95, Q5SWR1, Q9DCR2, Q8BMI3	9.37331	0.784008	0.0774914	10.0889
	GO:0042995~cell projection	11	7.91367	0.00883291	P97772, P06837, Q61553, P28661, Q9EQF6, P04370, Q641P0, Q8BIZ1, Q91XV3, P01831, Q14BI2	2.60008	0.792032	0.075515	10.3248

## Sheet: APT_UP (Cluster 5)
Category	Term	Count	%	PValue	Genes	Fold Enrichment	Bonferroni	Benjamini	FDR
GOTERM_BP_FAT	GO:0055114~oxidation reduction	50	10.8696	1.48e-11	Q8K009, Q9QYF1, P54071, Q99L04, Q9EQ20, P47791, Q6A0D0, Q8BMS1, O88455, Q2TPA8, Q9CXR1, Q3UNZ8, P37040, Q3TG52, P50544, O70252, Q99MZ7, Q8R0Y6, Q9CVF5, O88736, Q07417, Q8BSY0, Q99LB2, Q8C338, P45377, P19096, Q3TJ71, Q9WU79, P35700, O70503, Q9EQ06, Q64669, O08807, Q99LC5, Q3UAG2, Q00612, P11352, P00375, Q9DCN2, Q9CQ62, Q6P5I3, Q9Z0R9, Q61425, Q8R086, Q9R0H0, Q99L13, Q8BVI4, Q8VE30, O55102, Q9CY64	2.94756	2.85e-08	2.85e-08	2.54e-08
	GO:0016042~lipid catabolic process	18	3.91304	4.28e-08	Q91WC9, P51432, Q6A0D0, Q8BMS1, P11152, Q9QXE0, Q9R0H0, Q8BGZ6, Q8K3R3, Q99JY0, Q3TXR9, Q6GTX3, P29416, Q3TCN2, Q8CIH5, Q5F1Z8, Q60963, Q3UEE7, Q8VBX5	5.32144	8.23e-05	4.11e-05	7.32e-05
	GO:0044242~cellular lipid catabolic process	11	2.3913	1.14e-06	Q3TXR9, P51432, P29416, Q8BMS1, Q8CIH5, P11152, Q9QXE0, Q5F1Z8, Q8BGZ6, Q9R0H0, Q99JY0	7.78155	0.00218549	0.000729	0.00194805
	GO:0007155~cell adhesion	34	7.3913	5.29e-06	B2RTL6, O35114, B2RRE8, Q8C6F4, P40240, Q0VBD0, P16045, Q99JH7, Q8BM06, Q8VDD5, P43406, B2RSY3, P11835, Q8CIB5, P12023, A2APM2, P29788, P09055, P29533, Q9EPL2, P26039, Q62417, Q9EPC1, Q3U311, P97318, Q61739, Q64727, O35474, P13597, Q8VCC9, Q9CS84, Q8K1B8, Q810U4, P26231	2.40092	0.0101161	0.00253867	0.00905272
	GO:0022610~biological adhesion	34	7.3913	5.49e-06	B2RTL6, O35114, B2RRE8, Q8C6F4, P40240, Q0VBD0, P16045, Q99JH7, Q8BM06, Q8VDD5, P43406, B2RSY3, P11835, Q8CIB5, P12023, A2APM2, P29788, P09055, P29533, Q9EPL2, P26039, Q62417, Q9EPC1, Q3U311, P97318, Q61739, Q64727, O35474, P13597, Q8VCC9, Q9CS84, Q8K1B8, Q810U4, P26231	2.39665	0.0104896	0.00210677	0.00938873
	GO:0051186~cofactor metabolic process	17	3.69565	1.46e-05	Q8K009, P54071, Q9Z2I8, Q8R0Y6, P47791, Q8CC86, Q99L20, Q99L13, P32020, Q3UAG2, Q8C338, Q00612, Q3V117, O70252, Q64471, Q8VBX5, Q9CY64	3.70032	0.0276159	0.00465651	0.0249317
	GO:0006672~ceramide metabolic process	8	1.73913	2.68e-05	Q3TXR9, Q0VBD0, Q69ZN1, Q924Z4, A2VCP3, P29416, Q5F1Z8, Q8BGZ6	8.80337	0.0501732	0.0073267	0.045823
	GO:0046519~sphingoid metabolic process	8	1.73913	3.88e-05	Q3TXR9, Q0VBD0, Q69ZN1, Q924Z4, A2VCP3, P29416, Q5F1Z8, Q8BGZ6	8.34003	0.0718198	0.00927291	0.0663384
	GO:0019725~cellular homeostasis	23	5	5.8e-05	Q61482, Q07076, Q9EPL2, P70441, Q6A0D0, Q6ZQ49, P47791, P08003, P35700, P40240, Q3TXR9, P27773, Q3TJL8, O08807, Q6GTX3, A2VCP3, P29416, Q62351, Q3UY00, P12023, P09103, Q3UEE7, Q3UYI9, Q8VBX5	2.65641	0.105435	0.0123035	0.0991564
	GO:0030031~cell projection assembly	10	2.17391	6.14e-05	Q8K0T2, P70335, Q8BH43, Q3UJ44, A2VCP3, Q05144, Q6A0D0, Q61739, Q64727, Q3U111	5.65931	0.111271	0.011727	0.104978
	GO:0006979~response to oxidative stress	11	2.3913	6.41e-05	Q64669, Q920R0, Q9D964, Q6GTX3, Q6A0D0, Q549A5, Q00612, Q8CC86, Q8C338, P11352, P35700, Q3UEE7	5.00881	0.115933	0.0111396	0.109656
	GO:0006631~fatty acid metabolic process	16	3.47826	6.47e-05	Q9CZW4, Q99MZ7, Q9Z0R9, Q61425, Q8BMS1, Q8VCW8, Q9QXE0, Q9R0H0, P34914, Q07417, Q99JY0, Q9QUJ7, P50544, Q3UDA8, P19096, P97742	3.4448	0.116917	0.0103078	0.110647
	GO:0006732~coenzyme metabolic process	14	3.04348	6.53e-05	Q8K009, P54071, Q9Z2I8, Q8R0Y6, P47791, Q8CC86, Q99L20, Q99L13, P32020, Q3UAG2, Q8C338, Q00612, Q3V117, Q64471	3.87841	0.117972	0.00960979	0.11171
	GO:0051187~cofactor catabolic process	7	1.52174	0.000127	Q8K009, P54071, Q9Z2I8, Q8R0Y6, Q8C338, O70252, Q9CY64	8.66582	0.216242	0.0172534	0.216714
	GO:0016192~vesicle-mediated transport	27	5.86957	0.000129	Q8CG29, Q5KU39, Q3U9U5, Q3TBZ6, P70280, Q3UIA2, P13020, Q571D6, Q8BIJ7, Q8C6F4, Q8K3R3, Q920R0, P43406, Q62351, P12023, Q8VBX5, Q3TXC4, Q3U311, Q9D1D4, Q60770, P08101, P41233, Q80XK7, Q8BH43, A2VCP3, O70439, P70452	2.2953	0.219379	0.0163755	0.220277
	GO:0030029~actin filament-based process	15	3.26087	0.000147	P70335, P26039, Q62417, Q9QY06, Q05144, Q3UIA2, P13020, Q571D6, Q3UL48, Q3U6N7, Q8BH43, Q8VDD5, O70200, Q9DAW9, P09055	3.37629	0.24557	0.0174579	0.250592
	GO:0006665~sphingolipid metabolic process	9	1.95652	0.000153	Q3TXR9, Q0VBD0, Q69ZN1, Q924Z4, A9CLV6, A2VCP3, P29416, Q5F1Z8, Q8BGZ6	5.75059	0.255419	0.0171994	0.262263
	GO:0006952~defense response	26	5.65217	0.000175	Q8CG29, P01899, Q9D8Y7, Q60766, P08101, P35700, Q9EPB4, P14106, P42227, Q3UCJ0, P34914, Q6Q899, Q9Z1Q5, Q920R0, Q3TM31, Q61730, Q3U0U7, A2VCP3, Q99LD8, P11835, B2RXW7, P01027, P08905, A2APM2, P19973, Q60963	2.29909	0.285472	0.0185008	0.298843
	GO:0009611~response to wounding	22	4.78261	0.000191	Q7TMQ1, O88428, P56564, Q9EPB4, P14106, Q3UCJ0, P42227, Q3U6N7, Q8C6F4, P34914, P48036, Q3TM31, P10605, Q9D964, Q3U0U7, A2VCP3, P11835, B2RXW7, P11352, P01027, A2APM2, Q60963	2.51162	0.307004	0.0191165	0.326002
	GO:0006643~membrane lipid metabolic process	9	1.95652	0.000192	Q3TXR9, Q0VBD0, Q69ZN1, Q924Z4, A9CLV6, A2VCP3, P29416, Q5F1Z8, Q8BGZ6	5.57088	0.309007	0.0183115	0.328571
	GO:0006695~cholesterol biosynthetic process	6	1.30435	0.000227	Q9DCN2, Q3UWQ9, Q5M8R9, O88455, O88736, Q8VE30	10.3344	0.353814	0.020579	0.388051
	GO:0030036~actin cytoskeleton organization	14	3.04348	0.000276	P70335, P26039, Q62417, Q05144, Q3UIA2, P13020, Q571D6, Q3UL48, Q3U6N7, Q8BH43, Q8VDD5, O70200, Q9DAW9, P09055	3.36129	0.411982	0.0238473	0.471681
	GO:0019377~glycolipid catabolic process	4	0.869565	0.000299	Q3TXR9, P29416, Q5F1Z8, Q8BGZ6	26.4101	0.436911	0.0246611	0.510062
	GO:0008203~cholesterol metabolic process	9	1.95652	0.00036	Q9DCN2, Q3UWQ9, Q5M8R9, Q6GTX3, Q06EZ3, O88455, O88736, P41233, Q8VE30, Q3UEE7	5.09338	0.499342	0.0284148	0.614109
	GO:0045087~innate immune response	11	2.3913	0.000361	Q6Q899, Q9D8Y7, Q3TM31, Q60766, Q61730, Q3U0U7, B2RXW7, P01027, P35700, P14106, Q3UCJ0	4.07259	0.500745	0.0274031	0.616592
	GO:0002443~leukocyte mediated immunity	10	2.17391	0.000395	P13597, Q8CG29, Q9ES52, B2RXW7, P01027, P70280, P35700, P08101, P14106, Q3UCJ0	4.45114	0.531866	0.0287704	0.673531
	GO:0006694~steroid biosynthetic process	9	1.95652	0.000397	Q9DCN2, Q3UWQ9, Q5M8R9, O88455, O88736, Q6P9T6, Q8VE30, Q9EQ06, O70503	5.02164	0.533695	0.0278607	0.676993
	GO:0016044~membrane organization	18	3.91304	0.000539	Q80W54, Q3TXC4, Q3TBZ6, Q3U311, P70280, P08101, Q571D6, P41233, Q8BIJ7, P40240, Q8BH43, P43406, A2VCP3, Q62351, P12023, Q810U4, Q8C3J5, Q8VBX5	2.62159	0.645179	0.0363287	0.91833
	GO:0030155~regulation of cell adhesion	10	2.17391	0.000592	P13597, Q8CG29, Q3TXC4, Q8BLY1, Q9ER58, P97318, P29788, Q61739, O35474, O70503	4.21438	0.679614	0.038489	1.00835
	GO:0045785~positive regulation of cell adhesion	7	1.52174	0.000676	Q3TXC4, Q8BLY1, Q9ER58, P29788, Q61739, O35474, O70503	6.44898	0.727274	0.0423851	1.15021
	GO:0016125~sterol metabolic process	9	1.95652	0.000689	Q9DCN2, Q3UWQ9, Q5M8R9, Q6GTX3, Q06EZ3, O88455, O88736, P41233, Q8VE30, Q3UEE7	4.63034	0.734089	0.0418288	1.17248
	GO:0042592~homeostatic process	29	6.30435	0.000829	P55088, Q6A0D0, Q6ZQ49, P47791, P35700, P42227, P40240, O08807, Q6GTX3, Q9D024, P29416, Q00612, Q62351, P11352, P49710, P12023, Q3UEE7, Q3UYI9, P09103, Q8VBX5, Q61482, Q9EPL2, Q07076, P70441, P08003, Q3TXR9, P27773, Q3TJL8, A2VCP3, Q3UY00	1.96719	0.797071	0.0486189	1.41005
	GO:0016126~sterol biosynthetic process	6	1.30435	0.000833	Q9DCN2, Q3UWQ9, Q5M8R9, O88455, O88736, Q8VE30	7.92303	0.79831	0.0473577	1.41542
	GO:0006575~cellular amino acid derivative metabolic process	12	2.6087	0.000873	Q6P8J2, Q08642, Q9D964, P47791, Q3TG52, Q00612, Q8C338, Q99L20, P56564, Q64471, P09103, Q3TF14	3.3715	0.813359	0.0481708	1.48347
	GO:0045454~cell redox homeostasis	8	1.73913	0.000901	P27773, Q3TJL8, O08807, Q6A0D0, P47791, P08003, P35700, P09103	5.11163	0.823321	0.0483199	1.53158
	GO:0010324~membrane invagination	14	3.04348	0.000955	Q3TXC4, Q3TBZ6, Q3U311, P08101, P70280, Q571D6, P41233, Q8BIJ7, Q8BH43, P43406, A2VCP3, Q62351, P12023, Q8VBX5	2.95007	0.840719	0.04975	1.62242
	GO:0006897~endocytosis	14	3.04348	0.000955	Q3TXC4, Q3TBZ6, Q3U311, P08101, P70280, Q571D6, P41233, Q8BIJ7, Q8BH43, P43406, A2VCP3, Q62351, P12023, Q8VBX5	2.95007	0.840719	0.04975	1.62242
	GO:0001573~ganglioside metabolic process	4	0.869565	0.00118601	Q3TXR9, Q0VBD0, P29416, Q5F1Z8	17.6067	0.897805	0.0597835	2.01038
	GO:0030705~cytoskeleton-dependent intracellular transport	6	1.30435	0.00130372	Q8BH43, Q8VDD5, Q8CD76, Q9QY06, Q61768, P12023	7.20276	0.918519	0.0638541	2.20782
	GO:0006909~phagocytosis	7	1.52174	0.00136602	Q3TXC4, A2VCP3, P43406, P70280, P08101, P41233, Q571D6	5.65931	0.927725	0.0651471	2.31216
	GO:0007033~vacuole organization	6	1.30435	0.00149741	Q3TXR9, Q3ZAQ4, P24638, Q3TIR0, Q3UC89, P29416, Q8VBX5	6.99091	0.943875	0.0694733	2.53189
	GO:0050885~neuromuscular process controlling balance	6	1.30435	0.00149741	Q3TXR9, Q61482, P29416, P56564, P12023, Q5F1Z8	6.99091	0.943875	0.0694733	2.53189
	GO:0006887~exocytosis	10	2.17391	0.00182078	Q8CG29, A2VCP3, Q9D1D4, Q60770, P70280, Q3UIA2, Q80XK7, P70452, Q8C6F4, Q8K3R3	3.60138	0.969885	0.0818846	3.07066
	GO:0006689~ganglioside catabolic process	3	0.652174	0.00186344	Q3TXR9, P29416, Q5F1Z8	39.6152	0.97226	0.081813	3.14154
	GO:0006955~immune response	24	5.21739	0.00189606	Q8CG29, P01899, Q3TXC4, Q9D8Y7, Q3U9U5, Q60766, P35700, P70280, P08101, P14106, Q3UCJ0, Q3U6N7, P13597, Q6Q899, Q3TM31, Q9Z0E6, Q9ES52, Q9EQH2, Q61730, Q3U0U7, B2RXW7, P01027, Q8CIH5, P29788	2.01861	0.973949	0.0813317	3.1957
	GO:0009991~response to extracellular stimulus	11	2.3913	0.00195486	Q3ZAQ4, Q9Z1Q5, Q9D964, Q3TIR0, A2VCP3, Q99LD8, Q3UC89, Q8R086, Q61739, Q3UUH0, Q07417, Q64435	3.27644	0.976738	0.0819242	3.29324
	GO:0006664~glycolipid metabolic process	5	1.08696	0.00201443	Q3TXR9, Q0VBD0, P29416, Q5F1Z8, Q8BGZ6	9.00345	0.979259	0.0825207	3.39198
	GO:0008610~lipid biosynthetic process	17	3.69565	0.00237772	Q9DCN2, Q5M8R9, Q99MZ7, Q9Z0R9, O88455, O88736, Q6P9T6, O70503, Q9EQ06, Q3TXR9, Q3UWQ9, A9CLV6, Q924Z4, A2VCP3, Q3V117, P19096, Q8VE30	2.36301	0.989698	0.094679	3.99205
	GO:0008202~steroid metabolic process	12	2.6087	0.00253632	Q9DCN2, Q3UWQ9, Q5M8R9, Q6GTX3, Q06EZ3, O88455, O88736, P41233, Q6P9T6, Q8VE30, Q3UEE7, Q9EQ06, O70503	2.95268	0.992411	0.0986406	4.25292
	GO:0055074~calcium ion homeostasis	9	1.95652	0.00269505	Q3TXR9, Q9EPL2, Q07076, Q6GTX3, A2VCP3, Q6ZQ49, Q9D024, Q3UY00, P12023, Q3UEE7	3.75302	0.994411	0.102426	4.51332
	GO:0006749~glutathione metabolic process	5	1.08696	0.00281262	P47791, Q00612, Q8C338, Q99L20, Q64471	8.25316	0.995544	0.104595	4.70579
	GO:0002449~lymphocyte mediated immunity	8	1.73913	0.0029712	P13597, Q9ES52, B2RXW7, P01027, P35700, P08101, P14106, Q3UCJ0	4.17002	0.996717	0.108084	4.9648
	GO:0046466~membrane lipid catabolic process	4	0.869565	0.00374681	Q3TXR9, P29416, Q5F1Z8, Q8BGZ6	12.1893	0.999264	0.131918	6.22209
	GO:0006509~membrane protein ectodomain proteolysis	4	0.869565	0.00374681	Q6ZQF2, Q9EQH2, Q8VDD5, A2VCP3	12.1893	0.999264	0.131918	6.22209
	GO:0033619~membrane protein proteolysis	4	0.869565	0.00374681	Q6ZQF2, Q9EQH2, Q8VDD5, A2VCP3	12.1893	0.999264	0.131918	6.22209
	GO:0030149~sphingolipid catabolic process	4	0.869565	0.00374681	Q3TXR9, P29416, Q5F1Z8, Q8BGZ6	12.1893	0.999264	0.131918	6.22209
	GO:0007010~cytoskeleton organization	18	3.91304	0.00375903	P70335, P26039, Q62417, Q05144, Q9DCD6, Q3UIA2, P13020, Q571D6, Q3UL48, Q3U6N7, Q8BH43, Q8VDD5, O70200, P19973, Q9DAW9, P09055, Q8C3J5, A2A5Y6	2.18734	0.999282	0.129947	6.24178
	GO:0055066~di-, tri-valent inorganic cation homeostasis	11	2.3913	0.00385282	Q3TXR9, Q61482, Q9EPL2, Q07076, Q6GTX3, A2VCP3, Q6ZQ49, Q9D024, Q62351, Q3UY00, P12023, Q3UEE7	2.9847	0.999401	0.130632	6.39272
	GO:0044271~nitrogen compound biosynthetic process	17	3.69565	0.00417739	Q3ULZ3, Q08642, Q9WU79, Q6ZQ49, P54822, P55264, Q8CC86, P56564, Q9R1Z7, P16460, Q9CWS0, Q00612, Q8BVI4, Q3UBP0, O08739, Q3UUH0, P00375	2.22999	0.99968	0.138427	6.9133
	GO:0046395~carboxylic acid catabolic process	8	1.73913	0.00424866	Q8C0M9, Q9WU79, Q99LD8, Q8BMS1, Q9QXE0, Q9R0H0, Q3TF14, Q99JY0	3.91261	0.999721	0.138248	7.02724
	GO:0016054~organic acid catabolic process	8	1.73913	0.00424866	Q8C0M9, Q9WU79, Q99LD8, Q8BMS1, Q9QXE0, Q9R0H0, Q3TF14, Q99JY0	3.91261	0.999721	0.138248	7.02724
	GO:0009064~glutamine family amino acid metabolic process	6	1.30435	0.00430801	P16460, Q8C0M9, Q9WU79, Q99LD8, P56564, Q3UUH0	5.5277	0.999751	0.137721	7.12203
	GO:0010811~positive regulation of cell-substrate adhesion	5	1.08696	0.00437804	Q8BLY1, Q9ER58, P29788, O35474, O70503	7.33614	0.999782	0.137525	7.23376
	GO:0002252~immune effector process	10	2.17391	0.00455594	P13597, Q8CG29, Q9ES52, B2RXW7, P01027, P70280, P35700, P08101, P14106, Q3UCJ0	3.14406	0.999846	0.140427	7.51702
	GO:0008652~cellular amino acid biosynthetic process	6	1.30435	0.0047621	Q3ULZ3, P16460, Q9WU79, P56564, Q3UUH0, P00375	5.40207	0.999896	0.144015	7.84424
	GO:0019226~transmission of nerve impulse	14	3.04348	0.00481379	Q3TXR9, Q920R0, Q9EPL2, A2VCP3, Q6ZQ49, P29416, Q9CS84, P12023, Q810U4, P70452, Q3UYI9, Q541Z2, P40240, Q8VBX5	2.45404	0.999906	0.14322	7.92612
	GO:0008104~protein localization	32	6.95652	0.00484834	Q91W86, Q3U5F9, Q5KU39, Q3U9U5, P51150, Q01853, Q9DCD6, Q3TBZ6, P70280, Q8BIJ7, Q8C6F4, Q8R307, Q920R0, Q8VDD5, Q6GTX3, Q3TJ43, Q3UEE7, Q6ZQ51, Q8VBX5, Q3ZAQ4, A2AVJ7, Q8C788, P26039, Q9D1D4, Q60770, Q80XK7, Q3U111, B2RUK2, Q3TJN6, Q4FK79, Q810U4, O70439, P70452	1.68351	0.999912	0.141985	7.98081
	GO:0030003~cellular cation homeostasis	11	2.3913	0.00511777	Q3TXR9, Q61482, Q9EPL2, Q07076, Q6GTX3, A2VCP3, Q6ZQ49, Q62351, Q3UY00, P12023, Q3UEE7, Q8VBX5	2.86689	0.999948	0.147053	8.40624
	GO:0055065~metal ion homeostasis	9	1.95652	0.00527541	Q3TXR9, Q9EPL2, Q07076, Q6GTX3, A2VCP3, Q6ZQ49, Q9D024, Q3UY00, P12023, Q3UEE7	3.36355	0.999962	0.149021	8.65429
	GO:0009109~coenzyme catabolic process	5	1.08696	0.00569593	Q8K009, P54071, Q9Z2I8, Q8R0Y6, Q8C338	6.8302	0.999983	0.157638	9.3129
	GO:0051017~actin filament bundle formation	4	0.869565	0.00574266	Q62417, O70200, Q3UL48, Q3U6N7	10.564	0.999984	0.156584	9.3858
	GO:0019439~aromatic compound catabolic process	4	0.869565	0.00574266	Q8K009, Q9D379, Q8R0Y6, P34914	10.564	0.999984	0.156584	9.3858
	GO:0009084~glutamine family amino acid biosynthetic process	4	0.869565	0.00574266	P16460, Q9WU79, P56564, Q3UUH0	10.564	0.999984	0.156584	9.3858
	GO:0006911~phagocytosis, engulfment	4	0.869565	0.00574266	P70280, P08101, P41233, Q571D6	10.564	0.999984	0.156584	9.3858
	GO:0032060~bleb formation	3	0.652174	0.00600657	P70335, A2VCP3, Q6A0D0	23.7691	0.999991	0.160917	9.79654
	GO:0046479~glycosphingolipid catabolic process	3	0.652174	0.00600657	Q3TXR9, P29416, Q5F1Z8	23.7691	0.999991	0.160917	9.79654
	GO:0006873~cellular ion homeostasis	15	3.26087	0.00636764	Q61482, Q07076, Q9EPL2, P70441, Q6ZQ49, P40240, Q3TXR9, Q6GTX3, A2VCP3, P29416, Q62351, Q3UY00, P12023, Q3UYI9, Q3UEE7, Q8VBX5	2.27673	0.999995	0.16744	10.3557
	GO:0030005~cellular di-, tri-valent inorganic cation homeostasis	10	2.17391	0.00678383	Q3TXR9, Q61482, Q9EPL2, Q07076, Q6GTX3, A2VCP3, Q6ZQ49, Q62351, Q3UY00, P12023, Q3UEE7	2.95636	0.999998	0.17502	10.9961
	GO:0055080~cation homeostasis	12	2.6087	0.00693351	Q61482, Q9EPL2, Q07076, Q6ZQ49, Q3TXR9, Q6GTX3, A2VCP3, Q9D024, Q62351, P12023, Q3UY00, Q3UEE7, Q8VBX5	2.5836	0.999998	0.176182	11.2253
	GO:0007163~establishment or maintenance of cell polarity	5	1.08696	0.00725473	O55222, Q8VDD5, Q3UL48, P26231, Q8C3J5	6.38954	0.999999	0.181204	11.7155
	GO:0050801~ion homeostasis	16	3.47826	0.00746147	Q61482, Q07076, Q9EPL2, P70441, Q6ZQ49, P40240, Q3TXR9, Q6GTX3, A2VCP3, P29416, Q9D024, Q62351, Q3UY00, P12023, Q3UYI9, Q3UEE7, Q8VBX5	2.16329	0.999999	0.183511	12.0296
	GO:0032940~secretion by cell	12	2.6087	0.00749821	Q8CG29, A2VCP3, Q9D1D4, Q9CS84, Q60770, P70280, Q3UIA2, Q80XK7, P70452, Q8C6F4, Q8K3R3, Q8VBX5	2.55582	0.999999	0.182018	12.0853
	GO:0006720~isoprenoid metabolic process	6	1.30435	0.00755172	Q9QYF1, Q6P5I3, Q3UWQ9, Q5M8R9, Q99LB2, Q58EU7	4.85084	1	0.180927	12.1664
	GO:0019748~secondary metabolic process	7	1.52174	0.00770494	Q9QYF1, Q6P5I3, Q3UAG2, Q99LB2, Q00612, Q58EU7, Q99L13	4.01893	1	0.182002	12.3981
	GO:0006874~cellular calcium ion homeostasis	8	1.73913	0.00799888	Q3TXR9, Q9EPL2, Q07076, Q6GTX3, A2VCP3, Q6ZQ49, Q3UY00, P12023, Q3UEE7	3.48265	1	0.186011	12.8412
	GO:0055082~cellular chemical homeostasis	15	3.26087	0.00805544	Q61482, Q07076, Q9EPL2, P70441, Q6ZQ49, P40240, Q3TXR9, Q6GTX3, A2VCP3, P29416, Q62351, Q3UY00, P12023, Q3UYI9, Q3UEE7, Q8VBX5	2.21727	1	0.18498	12.9262
	GO:0007160~cell-matrix adhesion	6	1.30435	0.00822191	Q0VBD0, Q62417, P11835, P29788, Q61739, P09055	4.75382	1	0.186229	13.1759
	GO:0006081~cellular aldehyde metabolic process	4	0.869565	0.0082691	P54071, Q6P5I3, Q99LB2, Q8C338	9.32121	1	0.185032	13.2466
	GO:0031667~response to nutrient levels	9	1.95652	0.00852829	Q3ZAQ4, Q9Z1Q5, Q9D964, Q3TIR0, Q99LD8, Q3UC89, Q8R086, Q3UUH0, Q07417, Q64435	3.10032	1	0.188098	13.6338
	GO:0010033~response to organic substance	23	5	0.00904293	Q6P5I3, Q9D379, Q62417, P56564, Q60770, Q03963, Q3TW11, P42227, Q3U646, Q64435, Q07417, P48036, Q497Z6, Q9Z1Q5, Q3TM31, P24638, Q9D964, Q6GTX3, Q99LD8, A2VCP3, P49710, Q8CIH5, Q3UUH0, Q3UEE7	1.80425	1	0.196071	14.3977
	GO:0005996~monosaccharide metabolic process	12	2.6087	0.00915251	Q80UL3, O09159, O08528, Q7TSV4, Q3UAG2, Q00612, Q3TSZ4, P97742, P05063, Q99L13, Q64435	2.48891	1	0.196015	14.5596
	GO:0006790~sulfur metabolic process	8	1.73913	0.00949345	O88428, P47791, Q00612, Q8C338, Q9ER58, Q99L20, Q64471, Q3TF14	3.3715	1	0.200349	15.0613
	GO:0030100~regulation of endocytosis	6	1.30435	0.00968385	B2RRE8, P01027, P08101, Q8BIJ7, Q8BT06, Q8VBX5	4.57098	1	0.201754	15.3403
GOTERM_MF_FAT	GO:0048037~cofactor binding	26	5.65217	1.66e-09	Q3ULZ3, P54071, Q69ZN1, Q4VWZ5, O88986, P47791, Q8BMS1, Q64669, P37040, Q3UAG2, Q99LC5, P50544, Q3TG75, P00375, Q61425, Q9CVF5, Q9QXE0, Q6P9T6, Q8R086, Q9R0H0, Q07417, Q99L13, Q9WUR2, Q8C338, P19096, Q3TJ71	4.30622	1.01e-06	1.01e-06	2.46e-06
	GO:0050662~coenzyme binding	21	4.56522	9.15e-09	P54071, Q4VWZ5, Q61425, P47791, Q9CVF5, Q8BMS1, Q9QXE0, Q9R0H0, Q8R086, Q6P9T6, Q99L13, Q07417, Q9WUR2, Q64669, P37040, Q3UAG2, Q99LC5, P50544, Q8C338, Q3TJ71, P00375	4.91282	5.56e-06	2.78e-06	1.35e-05
	GO:0005509~calcium ion binding	52	11.3043	2.47e-08	P07356, Q91WC9, O35350, O35639, O88456, P42227, Q8K3R3, Q3UHJ2, P48036, Q8BM06, O08529, Q5DTL5, Q9R0N5, Q9ER58, Q3TM70, Q8CIH5, P50543, Q8BH79, Q3TYC4, Q07076, Q9EPL2, Q3V0K9, Q3UDK4, Q8BFR4, Q61739, Q3U6N7, O35474, P97352, Q9Z329, Q545I9, O35887, Q9CS84, Q91V77, O70200, B2RTL6, Q08642, P13020, Q5SUC3, Q3UDU1, Q99JH7, Q8BLY1, P43406, Q62288, Q9D024, Q9JLF6, Q3TVE3, P51432, Q7TMN7, Q3TW11, P40142,…	2.31716	1.5e-05	5.01e-06	3.66e-05
	GO:0008289~lipid binding	30	6.52174	4.51e-08	P07356, Q4VWZ5, Q01853, O35639, Q9QY06, Q8BMS1, P11152, Q8BIJ7, Q99J78, P48036, Q6GTX3, P32020, P51910, Q3UEE7, P70335, Q3TXC4, Q3TYC4, Q07076, Q8C788, Q7TMN7, P97318, Q58EU7, Q3UDK4, Q6P9T6, Q07417, Q9WUR2, Q80UU9, Q9Z329, Q3TJN6, O55022, Q3UFS5	3.25487	2.74e-05	6.85e-06	6.67e-05
	GO:0008092~cytoskeletal protein binding	30	6.52174	2.05e-06	Q8CG29, P07356, Q5KU39, Q3UJ44, Q9QY06, Q9DCD6, P13020, Q8R307, Q8VDD5, Q61768, P19973, Q9DAW9, A2A5Y6, P26039, Q3V0K9, Q9EPC1, Q3UL48, Q64727, Q3U6N7, Q3U5S6, Q3U111, Q8BH43, Q80X90, Q91Z25, Q3UY00, O70200, Q810U4, Q5SYD0, P26041, P26231	2.71239	0.00124556	0.000249	0.00303299
	GO:0005544~calcium-dependent phospholipid binding	7	1.52174	3.07e-05	P48036, P07356, Q3TYC4, Q07076, O35639, Q7TMN7, Q3UDK4	10.9174	0.0185027	0.00310782	0.0454387
	GO:0004197~cysteine-type endopeptidase activity	10	2.17391	4.06e-05	P10605, O08529, Q3TIF1, O35350, O89017, O88456, Q9EPB4, Q8R016, Q3UD32, Q545I6	5.94143	0.0243904	0.00352132	0.0600731
	GO:0003779~actin binding	21	4.56522	9.18e-05	Q8CG29, Q3UJ44, P26039, Q3V0K9, Q9QY06, Q9EPC1, P13020, Q3UL48, Q64727, Q3U6N7, Q3U111, Q8R307, Q8BH43, Q8VDD5, Q80X90, Q91Z25, O70200, P19973, Q5SYD0, Q9DAW9, P26231	2.72934	0.0543	0.00695444	0.135773
	GO:0000062~acyl-CoA binding	5	1.08696	0.000207	Q9WUR2, Q4VWZ5, Q8BMS1, Q6P9T6, Q07417	15.5962	0.118225	0.0138826	0.305718
	GO:0005539~glycosaminoglycan binding	12	2.6087	0.000228	Q3U311, P11152, Q3TWH7, Q99MQ5, O70503, Q497Z6, Q6GTX3, Q8K295, Q9ER58, P12023, A2APM2, P29788, Q3UEE7	3.9401	0.129436	0.0137658	0.336758
	GO:0008201~heparin binding	10	2.17391	0.000354	Q497Z6, Q6GTX3, Q8K295, Q3U311, P11152, P12023, P29788, Q3UEE7, Q3TWH7, Q99MQ5, O70503	4.50976	0.193475	0.0193575	0.521898
	GO:0016628~oxidoreductase activity, acting on the CH-CH group of donors, NAD or NADP as acceptor	5	1.08696	0.000536	Q9CQ62, Q99MZ7, O88455, P19096, Q9CY64	12.477	0.27797	0.0267757	0.789449
	GO:0001871~pattern binding	12	2.6087	0.00062	Q3U311, P11152, Q3TWH7, Q99MQ5, O70503, Q497Z6, Q6GTX3, Q8K295, Q9ER58, P12023, A2APM2, P29788, Q3UEE7	3.50915	0.313938	0.0285676	0.912742
	GO:0030247~polysaccharide binding	12	2.6087	0.00062	Q3U311, P11152, Q3TWH7, Q99MQ5, O70503, Q497Z6, Q6GTX3, Q8K295, Q9ER58, P12023, A2APM2, P29788, Q3UEE7	3.50915	0.313938	0.0285676	0.912742
	GO:0016864~intramolecular oxidoreductase activity, transposing S-S bonds	4	0.869565	0.00095	P27773, Q3TJL8, P08003, P09103	18.7155	0.439027	0.0404508	1.39695
	GO:0003756~protein disulfide isomerase activity	4	0.869565	0.00095	P27773, Q3TJL8, P08003, P09103	18.7155	0.439027	0.0404508	1.39695
	GO:0005543~phospholipid binding	11	2.3913	0.00128776	P48036, P07356, Q3TYC4, Q07076, Q8C788, Q9Z329, O35639, Q3TJN6, Q7TMN7, P97318, Q3UDK4	3.46001	0.543178	0.0508902	1.88854
	GO:0016862~intramolecular oxidoreductase activity, interconverting keto- and enol-groups	4	0.869565	0.00139745	P27773, Q3TJL8, P08003, P09103	16.636	0.57269	0.051753	2.04786
	GO:0046983~protein dimerization activity	20	4.34783	0.00194562	Q3TVE3, Q6P5I3, Q9D1A2, Q99K70, Q9EPB4, Q9R1Z7, P51791, P14106, P42227, Q8BGZ6, Q3TXR9, Q920R0, Q8VDD5, Q8C165, P29416, P11835, Q00612, Q3UY00, Q0P635, Q9QYE9	2.20182	0.693975	0.0672818	2.84042
	GO:0005504~fatty acid binding	5	1.08696	0.00206946	Q9WUR2, Q4VWZ5, Q8BMS1, Q6P9T6, Q07417	8.91214	0.716214	0.0675821	3.01865
	GO:0016813~hydrolase activity, acting on carbon-nitrogen (but not peptide) bonds, in linear amidines	4	0.869565	0.00344861	Q9CWS0, Q08642, Q9D964, Q99LD8	12.477	0.87759	0.104655	4.98296
	GO:0016645~oxidoreductase activity, acting on the CH-NH group of donors	5	1.08696	0.00402235	Q8K009, Q8R0Y6, Q9WU79, Q8BVI4, P00375	7.4862	0.913752	0.115317	5.78915
	GO:0042802~identical protein binding	17	3.69565	0.00487368	Q3TVE3, Q6P5I3, Q9EPB4, Q9R1Z7, P14106, Q8BGZ6, P42208, Q3U6N7, Q3TXR9, Q920R0, Q8VDD5, Q00612, P07091, Q3UY00, Q91V77, Q0P635, Q9QYE9	2.19423	0.948719	0.131901	6.97365
	GO:0033293~monocarboxylic acid binding	5	1.08696	0.00535201	Q9WUR2, Q4VWZ5, Q8BMS1, Q6P9T6, Q07417	6.93166	0.961717	0.137834	7.63306
	GO:0042803~protein homodimerization activity	13	2.82609	0.00560716	Q3TVE3, Q6P5I3, Q9EPB4, Q9R1Z7, P14106, Q8BGZ6, Q3TXR9, Q920R0, Q8VDD5, Q00612, Q3UY00, Q0P635, Q9QYE9	2.52126	0.967247	0.138122	7.98302
	GO:0004563~beta-N-acetylhexosaminidase activity	3	0.652174	0.00671003	Q3TXR9, P29416, Q5F1Z8	22.4586	0.983318	0.156808	9.48154
	GO:0000036~acyl carrier activity	3	0.652174	0.00671003	Q8K009, Q8R0Y6, P19096	22.4586	0.983318	0.156808	9.48154
	GO:0016646~oxidoreductase activity, acting on the CH-NH group of donors, NAD or NADP as acceptor	4	0.869565	0.00672208	Q8K009, Q8R0Y6, Q8BVI4, P00375	9.9816	0.983441	0.151286	9.49777
	GO:0031406~carboxylic acid binding	8	1.73913	0.00748434	Q8K009, Q9WUR2, Q4VWZ5, Q8BMS1, P56564, P19096, Q6P9T6, Q07417	3.52292	0.989617	0.161111	10.52
	GO:0050839~cell adhesion molecule binding	4	0.869565	0.00811199	P11835, B2RRE8, Q3UL48, P26231	9.35775	0.992932	0.167577	11.3536
	GO:0016408~C-acyltransferase activity	4	0.869565	0.00811199	O88986, P32020, Q8BMS1, Q99JY0	9.35775	0.992932	0.167577	11.3536
	GO:0015929~hexosaminidase activity	4	0.869565	0.00811199	Q3TXR9, O54752, P29416, Q5F1Z8	9.35775	0.992932	0.167577	11.3536
	GO:0051015~actin filament binding	6	1.30435	0.00952152	Q8VDD5, Q9QY06, O70200, Q3UL48, Q3U6N7, P26231	4.58339	0.997023	0.187585	13.1993
GOTERM_CC_FAT	GO:0005764~lysosome	36	7.82609	1.48e-19	Q91W86, O09159, Q8C5K0, P51150, Q6A0D0, O35114, Q9DCD6, P12265, P70280, Q9JHS3, Q8R307, P29416, Q6ZQ51, Q8VBX5, Q9DC13, Q8K2I4, Q3TIF1, P31996, O89017, Q9CQW2, Q80XK7, Q8BFR4, Q8BGZ6, Q3U646, Q8VEH3, Q3TXR9, P10605, P24638, Q3TIR0, Q3UC89, Q8VE96, Q3TWL2, Q3TCN2, Q5F1Z8, Q3UD32, Q8BT06, Q545I6	6.87201	4.21e-17	4.21e-17	1.96e-16
	GO:0000323~lytic vacuole	36	7.82609	1.78e-19	Q91W86, O09159, Q8C5K0, P51150, Q6A0D0, O35114, Q9DCD6, P12265, P70280, Q9JHS3, Q8R307, P29416, Q6ZQ51, Q8VBX5, Q9DC13, Q8K2I4, Q3TIF1, P31996, O89017, Q9CQW2, Q80XK7, Q8BFR4, Q8BGZ6, Q3U646, Q8VEH3, Q3TXR9, P10605, P24638, Q3TIR0, Q3UC89, Q8VE96, Q3TWL2, Q3TCN2, Q5F1Z8, Q3UD32, Q8BT06, Q545I6	6.83362	5.09e-17	2.54e-17	2.37e-16
	GO:0005773~vacuole	38	8.26087	2.28e-19	Q91W86, O09159, Q60766, P51150, Q8C5K0, Q6A0D0, O35114, Q9DCD6, P12265, P70280, Q9JHS3, Q8R307, P29416, Q6ZQ51, Q8VBX5, Q3ZAQ4, Q9DC13, Q8K2I4, Q3TIF1, P31996, O89017, Q9CQW2, Q80XK7, Q8BGZ6, Q8BFR4, Q3U646, Q8VEH3, Q3TXR9, P10605, P24638, Q3TIR0, Q3UC89, Q8VE96, Q3TWL2, Q3TCN2, Q5F1Z8, Q3UD32, Q8BT06, Q545I6	6.32928	6.49e-17	2.16e-17	3.02e-16
	GO:0042470~melanosome	23	5	2.46e-15	P07356, Q3UJ44, Q9DC13, P51150, P08003, Q9D1D4, P35700, Q3US35, Q3UDK4, Q5SUC3, Q3TF14, P27773, Q3TJL8, Q6ZQF2, Q3TW51, P10605, Q3TIR0, Q3UC89, Q62351, O35887, P19096, P09103, P97298, P09055	9.19412	6.96e-13	1.74e-13	3.24e-12
	GO:0048770~pigment granule	23	5	2.46e-15	P07356, Q3UJ44, Q9DC13, P51150, P08003, Q9D1D4, P35700, Q3US35, Q3UDK4, Q5SUC3, Q3TF14, P27773, Q3TJL8, Q6ZQF2, Q3TW51, P10605, Q3TIR0, Q3UC89, Q62351, O35887, P19096, P09103, P97298, P09055	9.19412	6.96e-13	1.74e-13	3.24e-12
	GO:0005768~endosome	31	6.73913	6.12e-11	Q91W86, P07356, Q5KU39, A2A7F6, Q8C5K0, P51150, P70280, P51791, Q8BIJ7, Q9JHS3, Q8R307, Q920R0, Q3TM31, Q9DBG5, Q9R0N5, Q62351, Q3TM70, Q6ZQ51, Q9DC13, Q9CRA5, P31996, O89017, Q8K273, Q9CQW2, Q80XK7, Q8VEH3, Q8BH43, Q3TWL2, O70439, Q8BT06, P56818	4.17987	1.74e-08	3.49e-09	8.11e-08
	GO:0000267~cell fraction	47	10.2174	1.6e-09	Q80W54, Q91VK4, O89051, P07356, Q9D379, Q9CZW4, Q8C5K0, Q922Q8, Q01853, Q6ZQ49, P12265, Q3UIA2, Q8R016, P42208, Q3UHJ2, Q64435, Q920R0, P37040, P11835, Q9D024, P12023, O70252, P09103, P09055, Q8VBX5, Q9DCN2, Q07076, P51432, Q9Z0R9, Q05144, Q06EZ3, Q9D1D4, Q3U311, Q497Z6, Q9Z1Q5, Q6ZQF2, P10605, P03995, P24638, Q9Z329, A2VCP3, Q9QUJ7, Q9CS84, O55022, P97742, Q9CY64, P56818	2.67949	4.55e-07	7.58e-08	2.12e-06
	GO:0031988~membrane-bounded vesicle	38	8.26087	2.15e-09	Q3UJ44, P07356, Q60766, P51150, Q8C5K0, Q9Z0S9, Q3TBZ6, B2RRE8, P70280, P35700, P51791, Q5SUC3, Q3TF14, Q8R420, Q9R0N5, Q62351, P97298, P09103, P09055, Q8VBX5, Q9DC13, Q3TYC4, P08003, Q9D1D4, Q3US35, Q3UDK4, P47867, P97822, Q3TXR9, P27773, Q3TJL8, Q9CQC8, Q6ZQF2, P10605, Q3TW51, Q3TIR0, Q3UC89, O35887, P19096	3.07422	6.13e-07	8.75e-08	2.85e-06
	GO:0031982~vesicle	43	9.34783	2.16e-09	Q3UJ44, P07356, Q60766, P51150, Q8C5K0, Q9Z0S9, Q3TBZ6, B2RRE8, P51791, P70280, P35700, Q5SUC3, Q3TF14, Q8R420, Q9R0N5, Q8CD76, Q62351, P12023, P97298, P09103, P09055, Q8VBX5, Q3ZAQ4, Q9DC13, Q3TYC4, Q07076, P08003, Q9D1D4, Q3US35, Q3UDK4, P47867, P97822, Q3TXR9, P27773, Q3TJL8, Q9CQC8, Q6ZQF2, P10605, Q3TW51, Q3TIR0, Q3UC89, O35887, P19096, P56818	2.81515	6.16e-07	7.7e-08	2.87e-06
	GO:0005739~mitochondrion	78	16.9565	2.25e-09	Q8K009, P54071, Q99L04, Q9EQ20, Q9CZW4, Q6A0D0, P47791, Q8BMS1, Q9R1Z7, Q2TPA8, O08528, Q3UNZ8, P32020, Q3TG52, P50544, P49710, P55096, Q9Z2I8, Q99MZ7, Q8R0Y6, P54822, Q8K449, Q8VCW8, Q07417, Q9WUR2, Q9CWS0, P10605, Q3TIR0, Q99LB2, P52196, Q8C338, Q3UDA8, P19096, Q5F1Z8, Q925N0, Q53YU5, O88986, Q4VWZ5, Q9WU79, Q9CXD6, P35700, Q8BSE0, P17156, Q64435, Q9D3P8, P16460, Q8C483, O08807, Q99LC5, P11352,…	2.00477	6.42e-07	7.13e-08	2.99e-06
	GO:0031410~cytoplasmic vesicle	42	9.13043	3.69e-09	Q3UJ44, P07356, Q60766, P51150, Q8C5K0, Q9Z0S9, Q3TBZ6, B2RRE8, P51791, P70280, P35700, Q5SUC3, Q3TF14, Q8R420, Q9R0N5, Q8CD76, Q62351, P12023, P97298, P09103, P09055, Q8VBX5, Q3ZAQ4, Q9DC13, Q3TYC4, P08003, Q9D1D4, Q3US35, Q3UDK4, P47867, P97822, Q3TXR9, P27773, Q3TJL8, Q9CQC8, Q6ZQF2, P10605, Q3TW51, Q3TIR0, Q3UC89, O35887, P19096, P56818	2.80923	1.05e-06	1.05e-07	4.9e-06
	GO:0016023~cytoplasmic membrane-bounded vesicle	37	8.04348	5.07e-09	Q3UJ44, P07356, Q60766, P51150, Q8C5K0, Q9Z0S9, Q3TBZ6, B2RRE8, P70280, P35700, Q5SUC3, Q3TF14, Q8R420, Q9R0N5, Q62351, P97298, P09103, P09055, Q8VBX5, Q9DC13, Q3TYC4, P08003, Q9D1D4, Q3US35, Q3UDK4, P47867, P97822, Q3TXR9, P27773, Q3TJL8, Q9CQC8, Q6ZQF2, P10605, Q3TW51, Q3TIR0, Q3UC89, O35887, P19096	3.0367	1.45e-06	1.31e-07	6.73e-06
	GO:0005626~insoluble fraction	42	9.13043	1.13e-08	Q80W54, Q91VK4, O89051, P07356, Q9CZW4, Q9D379, Q8C5K0, Q922Q8, Q01853, Q6ZQ49, P12265, Q3UIA2, P42208, Q3UHJ2, Q64435, Q920R0, P37040, P11835, Q9D024, P12023, O70252, P09103, P09055, Q8VBX5, Q07076, P51432, Q9Z0R9, Q05144, Q06EZ3, Q9D1D4, Q3U311, Q9Z1Q5, Q6ZQF2, P03995, P24638, Q9Z329, A2VCP3, Q9QUJ7, Q9CS84, O55022, P97742, P56818	2.70282	3.21e-06	2.67e-07	1.49e-05
	GO:0005770~late endosome	12	2.6087	3.86e-08	Q9JHS3, Q5KU39, Q9DC13, P51150, Q8C5K0, O89017, Q9CQW2, P70280, P51791, Q8BIJ7, Q8VEH3, Q8BT06	9.2668	1.1e-05	8.45e-07	5.11e-05
	GO:0005624~membrane fraction	39	8.47826	1.19e-07	Q91VK4, Q80W54, O89051, P07356, Q9CZW4, Q9D379, Q8C5K0, Q922Q8, Q01853, Q6ZQ49, P12265, P42208, Q3UHJ2, Q64435, Q920R0, P37040, P11835, Q9D024, P12023, O70252, P09103, P09055, Q8VBX5, Q9Z0R9, Q05144, Q06EZ3, Q3U311, Q9D1D4, Q9Z1Q5, Q6ZQF2, P03995, P24638, Q9Z329, A2VCP3, Q9QUJ7, Q9CS84, O55022, P97742, P56818	2.59834	3.39e-05	2.42e-06	0.000158
	GO:0005783~endoplasmic reticulum	52	11.3043	4.97e-07	Q9QYF1, Q80W54, Q69ZN1, Q60766, Q3U9U5, Q9D379, Q9CZW4, Q922Q8, O88455, P12265, P70280, Q8K3R3, P37040, Q9DBS1, O70252, A2AVJ7, Q8BFZ9, Q9EPL2, Q06EZ3, O88736, Q8VEH5, Q8BSY0, P27773, Q3TJL8, Q9EQH2, Q8BYU6, Q924Z4, A9CLV6, Q9Z329, Q8K295, O35887, O55022, Q91V77, P56818, Q01853, Q9DCD6, Q5SUC3, Q64435, O70503, Q99JH7, Q3TM31, Q9D024, P09103, Q9DCN2, Q9Z0R9, P08003, Q8K273, Q6ZQF2, A2RS96, Q9QUJ7,…	2.10844	0.000142	9.44e-06	0.000659
	GO:0042598~vesicular fraction	19	4.13043	6.71e-06	Q9D379, Q9CZW4, Q922Q8, Q01853, Q6ZQ49, Q06EZ3, Q9D1D4, P12265, Q64435, Q3UHJ2, Q920R0, P37040, Q9Z329, Q9QUJ7, Q9D024, O70252, O55022, P97742, P09103	3.54718	0.00190963	0.000119	0.00889185
	GO:0015629~actin cytoskeleton	20	4.34783	9.6e-06	Q8CG29, Q91W86, P07356, P26039, Q62417, Q9QY06, Q9DCD6, Q3UL48, Q64727, Q3U6N7, P42208, Q8R307, Q8VDD5, Q80X90, Q8CIB5, Q91Z25, Q8K1B8, O70200, Q5SYD0, P26231	3.31495	0.00273354	0.000161	0.0127333
	GO:0009898~internal side of plasma membrane	24	5.21739	1.28e-05	Q9Z0U1, Q91W86, O55222, Q9DCN2, Q8C788, P26039, Q9EPC1, Q80XK7, Q6P9T6, Q3UL48, Q64727, Q9DAS9, Q3U111, Q9JHS3, Q8R307, Q9Z0E6, Q9DBG5, B2RSY3, Q5F1Z8, P19973, Q3UKC8, P26041, P26231, A2A5Y6	2.84139	0.00365434	0.000203	0.01703
	GO:0005829~cytosol	36	7.82609	1.32e-05	Q3UJS6, Q9D1A2, Q01853, Q6A0D0, P13020, Q9EPB4, Q8BIJ7, P34914, Q3TF14, P70195, Q920R0, Q8VDD5, Q8CD76, Q3TG52, A6H663, A2A5Y6, Q8VBX5, Q5SVP3, Q7TMQ1, Q9DCN2, Q07076, P97371, Q62417, P51432, Q8CC86, P55264, Q60770, Q8R086, Q3U6N7, Q3UIT9, Q9CQC8, Q9Z1Q5, Q99LD8, Q8C338, O55102	2.22808	0.00374328	0.000197	0.0174452
	GO:0005792~microsome	18	3.91304	1.65e-05	Q9D379, Q9CZW4, Q922Q8, Q01853, Q6ZQ49, Q06EZ3, Q9D1D4, P12265, Q64435, Q3UHJ2, P37040, Q9Z329, Q9QUJ7, Q9D024, O70252, O55022, P97742, P09103	3.47505	0.00469386	0.000235	0.0218853
	GO:0031252~cell leading edge	13	2.82609	0.000108	P26039, Q9EPC1, B2RRE8, Q9JKF1, P13020, Q3U6N7, Q3U111, Q8BH43, Q920R0, Q3TFD9, Q8VDD5, Q3TWV0, O70200, P26231	3.94391	0.0301912	0.00145876	0.142514
	GO:0005884~actin filament	7	1.52174	0.000201	Q8CG29, Q8R307, Q91W86, Q8CIB5, O70200, Q3UL48, Q3U6N7	7.92826	0.0555514	0.00259454	0.265533
	GO:0001726~ruffle	8	1.73913	0.000405	Q8BH43, Q920R0, Q8VDD5, P26039, B2RRE8, O70200, Q3U6N7, Q3U111	5.78353	0.10901	0.00500579	0.535516
	GO:0044437~vacuolar part	7	1.52174	0.000484	Q60766, Q8C5K0, P24638, Q9CQW2, Q3TCN2, P70280, Q8VEH3	6.79565	0.128967	0.00573664	0.640282
	GO:0045177~apical part of cell	13	2.82609	0.000658	P70441, O89017, Q7TMN7, Q60770, P70280, P51791, Q3UDK4, Q3UL48, Q3U111, P10605, P12023, Q5F1Z8, P26041	3.24792	0.171155	0.00748079	0.869501
	GO:0005886~plasma membrane	112	24.3478	0.00103462	Q9Z0U1, P01899, P55088, Q8C5K0, O35350, P47791, O88456, Q3UIA2, Q571D6, P40240, Q3UHJ2, Q8R307, Q9Z0E6, O08529, Q9R0N5, Q62351, A2A5Y6, Q7TMQ1, Q3TYC4, Q61482, Q9EPL2, Q07076, P70441, P31996, Q9EPC1, O88736, Q9DAS9, Q61739, Q64727, Q3U111, P13597, B2RUK2, A9CLV6, Q61730, Q8K295, O70200, P28230, Q91W86, Q6ZQ49, Q9DCD6, Q3TBZ6, P51791, Q64435, Q8R420, Q9JHS3, Q99JH7, Q9DBG5, Q9ES52, Q6GTX3, P43406,…	1.30955	0.255484	0.0112828	1.36309
	GO:0005769~early endosome	8	1.73913	0.00106884	Q8R307, Q8BH43, Q91W86, P07356, Q5KU39, Q920R0, Q8K273, P51791	4.94229	0.262715	0.0112247	1.40786
	GO:0005912~adherens junction	11	2.3913	0.00109495	Q9JLF6, O55222, Q8VDD5, P26039, Q62417, Q80X90, Q9EPC1, Q8CIB5, Q61739, Q64727, P26231	3.52605	0.268188	0.0110892	1.44203
	GO:0031090~organelle membrane	40	8.69565	0.00149636	P54071, Q99L04, Q60766, Q3U9U5, Q9CZW4, O88986, Q8C5K0, Q9WU79, Q8BMS1, Q9DCD6, Q3TBZ6, P70280, P51791, Q64435, Q3TM31, Q99JH7, P50544, Q9QYE9, P55096, A2AVJ7, Q9DCN2, Q8BFZ9, Q9EPL2, Q9WTP6, Q61425, Q9CQW2, Q9D1D4, Q9R0H0, Q8VEH3, Q99JY0, Q8BSY0, Q9D964, A9CLV6, P52196, Q9QUJ7, Q4FK79, Q3UDA8, P97742, Q8BT06, Q925N0	1.68001	0.347395	0.0146089	1.96585
	GO:0044459~plasma membrane part	69	15	0.00161883	Q9Z0U1, O55222, P07356, P01899, P55088, P47791, Q3UIA2, Q3UHJ2, Q8R307, Q0VBD0, Q9Z0E6, Q8VDD5, Q9R0N5, B2RSY3, A2APM2, A2A5Y6, Q7TMQ1, Q9DC13, Q3TYC4, Q9EPL2, P26039, P70441, Q9EPC1, Q60770, Q3UDK4, Q80XK7, Q9DAS9, Q64727, Q61739, Q3U6N7, Q99MQ5, Q3U111, Q3TJH1, P13597, P10605, B2RUK2, Q80X90, Q99PT1, Q5F1Z8, O70200, P26041, P28230, Q91W86, Q9Z0S9, P51791, Q3UCJ0, Q64435, Q9JHS3, Q9DBG5, Q6GTX3,…	1.4357	0.369815	0.0152735	2.12516
	GO:0045335~phagocytic vesicle	4	0.869565	0.0018465	Q60766, P51150, Q8C5K0, P70280	15.1014	0.409472	0.016848	2.42066
	GO:0005913~cell-cell adherens junction	6	1.30435	0.00191972	Q9JLF6, Q8VDD5, Q62417, Q61739, Q64727, P26231	6.57644	0.42169	0.0169683	2.51551
	GO:0016323~basolateral plasma membrane	12	2.6087	0.0029289	O55222, B2RUK2, P26039, Q62417, Q80X90, Q9EPC1, Q8CIB5, A2APM2, P70452, Q61739, Q64727, P26041	2.89177	0.566543	0.025014	3.81432
	GO:0030055~cell-substrate junction	8	1.73913	0.00311615	O55222, B2RUK2, P26039, Q62417, Q80X90, Q9EPC1, Q8CIB5, Q64727	4.11858	0.589134	0.0258222	4.05353
	GO:0070161~anchoring junction	11	2.3913	0.00332843	Q9JLF6, O55222, Q8VDD5, P26039, Q62417, Q80X90, Q9EPC1, Q8CIB5, Q61739, Q64727, P26231	3.03871	0.61333	0.0267829	4.32407
	GO:0005777~peroxisome	10	2.17391	0.00346729	Q9WUR2, Q9CZW4, Q99MZ7, P32020, Q99LB2, Q9QUJ7, Q9QXE0, Q9R0H0, P34914, P55096	3.26714	0.628384	0.0271225	4.50066
	GO:0042579~microbody	10	2.17391	0.00346729	Q9WUR2, Q9CZW4, Q99MZ7, P32020, Q99LB2, Q9QUJ7, Q9QXE0, Q9R0H0, P34914, P55096	3.26714	0.628384	0.0271225	4.50066
	GO:0001725~stress fiber	5	1.08696	0.004154	P07356, Q8VDD5, Q62417, Q80X90, Q8CIB5	7.38658	0.694668	0.0315551	5.3695
	GO:0032432~actin filament bundle	5	1.08696	0.00487114	P07356, Q8VDD5, Q62417, Q80X90, Q8CIB5	7.0788	0.75134	0.0359603	6.26904
	GO:0042641~actomyosin	5	1.08696	0.00750843	P07356, Q8VDD5, Q62417, Q80X90, Q8CIB5	6.29227	0.88328	0.0535871	9.50955
	GO:0001931~uropod	3	0.652174	0.00810099	Q8VDD5, Q3UL48, P26041	20.387	0.901548	0.0563072	10.2232
	GO:0031254~trailing edge	3	0.652174	0.00810099	Q8VDD5, Q3UL48, P26041	20.387	0.901548	0.0563072	10.2232
	GO:0030139~endocytic vesicle	5	1.08696	0.00856094	Q60766, P51150, Q8C5K0, B2RRE8, P70280	6.06755	0.913738	0.0580143	10.7736
	GO:0005774~vacuolar membrane	5	1.08696	0.00856094	Q60766, Q8C5K0, Q9CQW2, P70280, Q8VEH3	6.06755	0.913738	0.0580143	10.7736
	GO:0008305~integrin complex	5	1.08696	0.00856094	Q0VBD0, P43406, P11835, Q61739, P09055	6.06755	0.913738	0.0580143	10.7736
	GO:0005924~cell-substrate adherens junction	7	1.52174	0.00875762	O55222, P26039, Q62417, Q80X90, Q9EPC1, Q8CIB5, Q64727	3.89914	0.918481	0.057942	11.008
